# Supplementary material
Source: PubMed Central journal article supplement (PMC3861725)
Supplement: supp_M113.029595_mcp.M113.029595-1.pdf [file supp_M113.029595_mcp.M113.029595-1.pdf]

Supplementary Information for

**“6-Thioguanine Induces Mitochondrial Dysfunction and Oxidative DNA Damage in Acute Lymphoblastic Leukemia Cells”**

by

Fan Zhang, Lijuan Fu, and Yinsheng Wang

*Mol. Cell. Proteomics*, 2013

**Table of Contents:**

| Contents                                                                                                                                                                                                                                                                                                                                                                                                                                                                                                                                                     | Pages   |
|--------------------------------------------------------------------------------------------------------------------------------------------------------------------------------------------------------------------------------------------------------------------------------------------------------------------------------------------------------------------------------------------------------------------------------------------------------------------------------------------------------------------------------------------------------------|---------|
| <b>Table S1.</b> A list of all quantified proteins and their expression ratios in <sup>S</sup> G-treated cells versus control untreated cells.                                                                                                                                                                                                                                                                                                                                                                                                               | 2-186   |
| <b>Table S2.</b> A list of proteins which could be quantified in at least two sets of SILAC labeling experiments (at least one set from forward labeling and another set from reverse labeling) and whose expressions were changed significantly upon <sup>S</sup> G treatment.                                                                                                                                                                                                                                                                              | 187-189 |
| <b>Table S3.</b> Pathways perturbed by <sup>S</sup> G treatment, as identified by IPA.                                                                                                                                                                                                                                                                                                                                                                                                                                                                       | 190-191 |
| <b>Figure S1.</b> Example mass spectra showing the incorporation of heavy labeled K and R. Shown are the ESI-MS of two trypsin-miscleaved peptides which carry two arginines or two lysines; IGEEEIQKPEEK and DILLRPELEELR are derived from splicing factor 3a (SAP114) and NADH-cytochrome b5 reductase (CYB5R3), respectively. The ions of <i>m/z</i> 751.4 and <i>m/z</i> 718.9 refer to the putative incompletely labeled peptides (i.e., with a single R or K being heavily labeled), which are present at similar abundance levels as the noise peaks. | 192     |
| <b>Figure S2.</b> Flow cytometry results for control CEM cells, and CEM cells that were treated for 24 hrs with 3 μM <sup>S</sup> G and 500 μM allopurinol, alone or in combination. In (a), no MitoTracker Deep Red was added, whereas MitoTracker Deep Red was added in (b).                                                                                                                                                                                                                                                                               | 193     |
| <b>Figure S3.</b> Western blot for monitoring the expression levels of ectopically expressed Myc-Miro1 in HEK293T cells upon treatment with 3 μM <sup>S</sup> G (a). β-actin serves as the loading control. Shown in (b) are the quantification data, which represent the mean and S. D. of results from three independent drug treatment and Western blot experiments.                                                                                                                                                                                      | 194     |
| <b>Figures S4-S5.</b> Representative selected-ion chromatograms from the LC-MS/MS quantification of <i>R</i> -cdA and <i>S</i> -cdA.                                                                                                                                                                                                                                                                                                                                                                                                                         | 195-196 |
| <b>Figures S6-S9.</b> Calibration curves for the quantifications of cdA and cdG.                                                                                                                                                                                                                                                                                                                                                                                                                                                                             | 197-198 |

**Table S1.** A list of all quantified proteins and their expression ratios in <sup>S</sup>G-treated cells versus control untreated cells. Displayed are the Maxquant-derived normalized ratios of light/heavy (“L/H”)-labeled proteins (UniProt Protein ID, Protein Name, and Gene Name are shown) obtained from two forward (labeled as “F1” and “F2”) and one reverse (labeled as “R”) SILAC labeling experiments. The “L/H” ratios obtained from forward SILAC experiments represent the protein expression ratios in <sup>S</sup>G-treated versus untreated cells. For convenient comparison, the Maxquant-derived normalized ratios of heavy/light (“H/L”)-labeled proteins obtained from reverse SILAC labeling experiment are also listed; these ratios represent the protein expression ratios in <sup>S</sup>G-treated versus untreated cells. The mean [“Mean (T/U)”] and standard deviation (“S.D.”) of protein expression ratios in <sup>S</sup>G-treated versus untreated cells derived from at least two sets (including one reverse labeling) of SILAC labeling experiments are also listed, where those proteins with a “NA” under the “S.D.” column designate that they were quantified in only one set of SILAC labeling experiment. Shown also are the number of peptides identified for each protein (“Pep. No.”) and percent sequence coverage (“%Seq. Cov.”) for each quantified protein.

| UniProt ID | Protein_Name                                    | Gene Name      | F1 (L/H) | F2 (L/H) | R1 (H/L) | R1 (L/H) | Mean (T/U) | S.D. | Pep. No. | %Seq. Cov. | PEP       |
|------------|-------------------------------------------------|----------------|----------|----------|----------|----------|------------|------|----------|------------|-----------|
| P61626     | 1,4-beta-N-acetylmuramidase C                   | LYZ            |          |          | 0.03     | 33.33    | 0.03       |      | 2        | 27         | 1.61E-80  |
| P31025     | Lipocalin-1                                     | LCN1           |          |          | 0.04     | 25.00    | 0.04       |      | 5        | 27         | 1.14E-30  |
| Q02383     | Semenogelin II                                  | SEMG2          |          |          | 0.05     | 20.00    | 0.05       |      | 3        | 7.6        | 1.07E-13  |
| P05109     | Calgranulin-A                                   | CAGA           |          |          | 0.08     | 12.50    | 0.08       |      | 2        | 24         | 5.17E-15  |
| Q6N092     | Putative uncharacterized protein DKFZp686K18196 | DKFZp686K18196 |          |          | 0.08     | 12.50    | 0.08       |      | 2        | 5          | 1.87E-02  |
| A2NYV2     | Light chain Fab                                 | CyAT1          |          |          | 0.08     | 12.50    | 0.08       |      | 3        | 15         | 1.07E-08  |
| P01833     | Hepatocellular carcinoma-associated protein TB6 | PIGR           |          |          | 0.11     | 9.09     | 0.11       |      | 3        | 6.4        | 3.62E-156 |
| Q9P275     | Deubiquitinating enzyme 36                      | KIAA1453       |          |          | 0.13     | 7.69     | 0.13       |      | 3        | 3.8        | 3.96E-03  |
| P41134-1   | Class B basic helix-loop-helix protein 24       | BHLHB24        | 0.14     |          |          |          | 0.14       |      | 2        | 19         | 2.74E-13  |
| Q13422     | Ikaros family zinc finger protein 3             | IKZF3          |          |          | 0.15     | 6.67     | 0.15       |      | 3        | 7.5        | 4.16E-06  |
| P69905     | Alpha-globin                                    | HBA1           |          |          | 0.15     | 6.67     | 0.15       |      | 3        | 28         | 9.69E-13  |
| P02788     | Lactoferrin                                     | LTF            |          |          | 0.18     | 5.56     | 0.18       |      | 9        | 17         | 2.81E-251 |
| Q96Q83-1   | Alkylated DNA repair protein alkB homolog 3     | ABH3           |          |          | 0.21     | 4.76     | 0.21       |      | 2        | 9.1        | 4.83E-06  |
| Q8WXE9-1   | Stoned B                                        | STN2           |          |          | 0.22     | 4.55     | 0.22       |      | 2        | 2.4        | 2.27E-04  |
| B4DYZ3     | Uncharacterized protein C8orf45                 | C8orf45        |          |          | 0.23     | 4.35     | 0.23       |      | 2        | 2.9        | 1.39E-03  |

| UniProt ID | Protein_Name                                                              | Gene Name | F1 (L/H) | F2 (L/H) | R1 (H/L) | R1 (L/H) | Mean (T/U) | S.D. | Pep. No. | %Seq. Cov. | PEP      |
|------------|---------------------------------------------------------------------------|-----------|----------|----------|----------|----------|------------|------|----------|------------|----------|
| P11532     | Dystrophin                                                                | DMD       |          |          | 0.23     | 4.35     | 0.23       |      | 2        | 0.6        | 1.13E-02 |
| Q53172     | Putative uncharacterized protein                                          | IGKC      |          |          | 0.24     | 4.17     | 0.24       |      | 3        | 23         | 2.83E-82 |
| P12883     | Myosin heavy chain 7                                                      | MYH7      |          |          | 0.30     | 3.33     | 0.30       |      | 5        | 3.3        | 2.07E-14 |
| P09382     | 14 kDa laminin-binding protein                                            | LGALS1    | 0.32     |          | 0.30     | 3.33     | 0.31       | 0.01 | 3        | 24         | 1.00E-25 |
| P02545-1   | 70 kDa lamin                                                              | LMNA      |          | 0.32     |          |          | 0.32       |      | 5        | 7.2        | 8.34E-14 |
| Q6UXB8-1   | Cysteine-rich secretory protein 9                                         | CRISP9    |          | 0.41     | 0.30     | 3.33     | 0.36       | 0.08 | 3        | 8.4        | 1.13E-41 |
| Q8WXG9-1   | G-protein coupled receptor 98                                             | GPR98     | 0.24     | 0.33     | 0.52     | 1.92     | 0.36       | 0.14 | 2        | 0.7        | 5.22E-02 |
| B4DN86     | cDNA FLJ56047, highly similar to A kinase anchor protein 1, mitochondrial | AKAP1     |          |          | 0.40     | 2.50     | 0.40       |      | 2        | 5          | 1.34E-74 |
| Q5H9S7     | DDB1- and CUL4-associated factor 8                                        | DCAF8     |          |          | 0.40     | 2.50     | 0.40       |      | 2        | 2.5        | 7.57E-04 |
| Q6ZN13     | cDNA FLJ16525 fis, clone OCBBF2005433, weakly similar to N-CHIMAERIN      | ARHGAP9   |          | 0.41     |          |          | 0.41       |      | 2        | 2.3        | 1.32E-03 |
| O60443     | Inversely correlated with estrogen receptor expression 1                  | DFNA5     |          |          | 0.43     | 2.33     | 0.43       |      | 2        | 4.6        | 4.17E-05 |
| Q8WVM0     | Dimethyladenosine transferase 2, mitochondrial                            | NS5ATP5   |          |          | 0.43     | 2.33     | 0.43       |      | 2        | 6.6        | 1.47E-05 |
| Q8NB37-2   | Parkinson disease 7 domain-containing protein 1                           | PDDC1     | 0.32     | 0.54     | 0.44     | 2.27     | 0.43       | 0.11 | 2        | 14         | 3.13E-14 |
| Q99707     | 5-methyltetrahydrofolate--homocysteine methyltransferase                  | MTR       | 0.38     | 0.46     | 0.48     | 2.08     | 0.44       | 0.05 | 3        | 2.9        | 2.51E-13 |
| Q9Y2C4-1   | Endonuclease G-like 1                                                     | ENDOGL1   |          |          | 0.44     | 2.27     | 0.44       |      | 2        | 7.6        | 1.45E-08 |
| P11802     | Cell division protein kinase 4                                            | CDK4      |          |          | 0.44     | 2.27     | 0.44       |      | 3        | 12         | 4.27E-05 |
| Q9UJY4     | ADP-ribosylation factor-binding protein GGA2                              | GGA2      |          |          | 0.44     | 2.27     | 0.44       |      | 3        | 9          | 5.59E-05 |
| O14776     | Nuclear transcription factor, X box-binding protein 1                     | NFX1      |          |          | 0.45     | 2.22     | 0.45       |      | 2        | 2.5        | 1.66E-03 |
| Q14197     | Digestion substraction 1                                                  | DS1       |          | 0.45     |          |          | 0.45       |      | 2        | 8.9        | 3.68E-18 |
| P10606     | Cytochrome c oxidase polypeptide Vb                                       | COX5B     | 0.39     | 0.51     | 0.46     | 2.17     | 0.45       | 0.06 | 3        | 23         | 1.84E-05 |
| P63313     | Thymosin beta-10                                                          | PTMB10    | 0.39     | 0.52     |          |          | 0.46       | 0.09 | 3        | 32         | 8.54E-05 |
| Q16342     | Programmed cell                                                           | PDCD2     |          |          | 0.46     | 2.17     | 0.46       |      | 3        | 9.3        | 1.90E-21 |

| UniProt ID | Protein_Name                                                                    | Gene Name | F1 (L/H) | F2 (L/H) | R1 (H/L) | R1 (L/H) | Mean (T/U) | S.D. | Pep. No. | %Seq. Cov. | PEP       |
|------------|---------------------------------------------------------------------------------|-----------|----------|----------|----------|----------|------------|------|----------|------------|-----------|
|            | death protein 2                                                                 |           |          |          |          |          |            |      |          |            |           |
| Q8NEY8     | Gastric cancer antigen Ga50                                                     | HSPC206   |          |          | 0.46     | 2.17     | 0.46       |      | 3        | 6.2        | 3.54E-05  |
| Q9NU22     | MIDAS-containing protein                                                        | KIAA0301  |          |          | 0.46     | 2.17     | 0.46       |      | 4        | 1.5        | 3.75E-09  |
| A6NMH8     | Putative uncharacterized protein CD81                                           | CD81      | 0.13     |          | 0.82     | 1.22     | 0.48       | 0.49 | 2        | 16         | 1.11E-19  |
| Q9H8H0     | Nucleolar protein 11                                                            | L14       |          |          | 0.48     | 2.08     | 0.48       |      | 2        | 4          | 8.92E-09  |
| P49821-1   | Complex I-51kD                                                                  | NDUFV1    |          | 0.48     |          |          | 0.48       |      | 2        | 3.9        | 2.28E-04  |
| O60488-1   | Long-chain acyl-CoA synthetase 4                                                | ACS4      |          | 0.48     |          |          | 0.48       |      | 2        | 4.1        | 1.57E-14  |
| Q9H8V3-2   | Epithelial cell-transforming sequence 2 oncogene                                | ECT2      | 0.57     | 0.32     | 0.56     | 1.79     | 0.48       | 0.14 | 2        | 2.2        | 2.29E-27  |
| B7Z6C0     | cDNA FLJ56946, highly similar to Cysteine-rich protein 2                        | CRIP2     | 0.31     | 0.40     | 0.76     | 1.32     | 0.49       | 0.24 | 2        | 17         | 7.60E-33  |
| Q9Y618-1   | CTG repeat protein 26                                                           | CTG26     |          |          | 0.49     | 2.04     | 0.49       |      | 3        | 2.1        | 8.00E-08  |
| Q99490-1   | Arf-GAP with GTPase, ANK repeat and PH domain-containing protein 2              | AGAP2     |          | 0.49     |          |          | 0.49       |      | 2        | 1.4        | 1.37E-03  |
| O75794     | Cell division cycle protein 123 homolog                                         | C10orf7   | 0.64     |          | 0.37     | 2.70     | 0.51       | 0.19 | 3        | 9.5        | 6.31E-23  |
| P08590     | Cardiac myosin light chain 1                                                    | MYL3      | 0.52     | 0.50     | 0.51     | 1.96     | 0.51       | 0.01 | 2        | 14         | 1.52E-77  |
| P00403     | Cytochrome c oxidase polypeptide II                                             | MT-CO2    | 0.56     |          | 0.46     | 2.17     | 0.51       | 0.07 | 3        | 30         | 9.46E-27  |
| P49427     | Ubiquitin-conjugating enzyme E2 R1                                              | CDC34     |          |          | 0.51     | 1.96     | 0.51       |      | 2        | 11         | 3.82E-04  |
| O95343     | Homeobox protein SIX3                                                           | SIX3      |          |          | 0.51     | 1.96     | 0.51       |      | 2        | 9.3        | 2.10E-27  |
| Q6PFW2     | Rho guanine nucleotide exchange factor (GEF) 11                                 | ARHGEF11  |          | 0.51     |          |          | 0.51       |      | 2        | 1.2        | 7.01E-03  |
| B4DNS2     | cDNA FLJ51602, highly similar to Interferon-induced guanylate-binding protein 1 | GBP1      | 0.51     |          |          |          | 0.51       |      | 2        | 7.6        | 3.83E-03  |
| P14927     | Complex III subunit 7                                                           | UQBP      | 0.51     |          |          |          | 0.51       |      | 4        | 41         | 1.05E-32  |
| O75879     | Cytochrome oxidase assembly factor PET112 homolog                               | HSPC199   | 0.42     |          | 0.62     | 1.61     | 0.52       | 0.14 | 2        | 4.7        | 8.02E-09  |
| O43566-5   | Regulator of G-protein signaling 14                                             | RGS14     |          | 0.52     |          |          | 0.52       |      | 2        | 3.7        | 7.92E-05  |
| O95865     | Dimethylargininase-2                                                            | DDAH      | 0.47     | 0.45     | 0.65     | 1.54     | 0.52       | 0.11 | 9        | 43         | 6.37E-120 |
| P42575-1   | Caspase-2                                                                       | CASP2     | 0.48     |          | 0.57     | 1.75     | 0.53       | 0.06 | 6        | 21         | 1.66E-24  |

| UniProt ID | Protein_Name                                                     | Gene Name | F1 (L/H) | F2 (L/H) | R1 (H/L) | R1 (L/H) | Mean (T/U) | S.D. | Pep. No. | %Seq. Cov. | PEP      |
|------------|------------------------------------------------------------------|-----------|----------|----------|----------|----------|------------|------|----------|------------|----------|
| Q9NUV9     | GTPase IMAP family member 4                                      | GIMAP4    | 0.50     | 0.54     | 0.54     | 1.85     | 0.53       | 0.02 | 8        | 23         | 6.25E-33 |
| Q01970     | 1-phosphatidylinositol-4,5-bisphosphate phosphodiesterase beta-3 | PLCB3     | 0.94     |          | 0.12     | 8.33     | 0.53       | 0.58 | 4        | 4.6        | 2.60E-22 |
| B4DSL6     | cDNA FLJ57190, highly similar to Actin-binding protein anillin   | ANLN      |          |          | 0.53     | 1.89     | 0.53       |      | 2        | 3.8        | 8.42E-07 |
| P82094-2   | Androgen receptor coactivator 160 kDa protein                    | ARA160    | 0.53     |          |          |          | 0.53       |      | 3        | 4.3        | 5.49E-18 |
| O75155-1   | Cullin-associated and neddylation-dissociated protein 2          | CAND2     | 0.68     |          | 0.39     | 2.56     | 0.54       | 0.21 | 9        | 11         | 6.16E-54 |
| P09669     | Cytochrome c oxidase polypeptide VIc                             | COX6C     |          | 0.57     | 0.51     | 1.96     | 0.54       | 0.04 | 3        | 21         | 1.47E-05 |
| Q9UJX4     | Anaphase-promoting complex subunit 5                             | ANAPC5    |          |          | 0.54     | 1.85     | 0.54       |      | 2        | 4.8        | 2.90E-38 |
| Q9ULI4     | Kinesin-like protein KIF26A                                      | KIAA1236  |          |          | 0.54     | 1.85     | 0.54       |      | 2        | 1.1        | 3.27E-02 |
| B4DWF2     | cDNA FLJ55795, highly similar to Zinc finger protein Helios      | hCG_14830 |          | 0.54     |          |          | 0.54       |      | 3        | 7.7        | 3.06E-04 |
| Q86UY6-1   | N-acetyltransferase 11                                           | NAA40     | 0.81     |          | 0.28     | 3.57     | 0.55       | 0.37 | 2        | 12         | 1.28E-39 |
| Q15154-1   | Pericentriolar material 1 protein                                | PCM1      | 0.42     | 0.66     | 0.57     | 1.75     | 0.55       | 0.12 | 12       | 5.9        | 6.63E-57 |
| O95229     | ZW10 interactor                                                  | ZWINT     | 0.51     | 0.59     |          |          | 0.55       | 0.06 | 3        | 12         | 2.37E-47 |
| P12829     | Myosin light chain 1, embryonic muscle/atrial isoform            | MLC1      | 0.55     |          |          |          | 0.55       |      | 2        | 15         | 8.64E-07 |
| O43683     | Mitotic checkpoint serine/threonine-protein kinase BUB1          | BUB1      |          | 0.68     | 0.44     | 2.27     | 0.56       | 0.17 | 3        | 5.1        | 3.64E-09 |
| P50748     | Kinetochore-associated protein 1                                 | KIAA0166  |          |          | 0.56     | 1.79     | 0.56       |      | 2        | 1.1        | 5.04E-02 |
| Q14699     | Cell migration-inducing gene 2 protein                           | KIAA0084  |          |          | 0.57     | 1.75     | 0.57       |      | 4        | 8.1        | 8.94E-24 |
| Q13190-1   | Syntaxin-5                                                       | STX5      | 0.56     | 0.51     | 0.66     | 1.52     | 0.58       | 0.08 | 3        | 8.2        | 3.86E-06 |
| O60684     | Importin subunit alpha-7                                         | IPOA7     |          |          | 0.58     | 1.72     | 0.58       |      | 4        | 11         | 1.47E-76 |
| O95864     | Delta(6) fatty acid desaturase                                   | FADS2     |          |          | 0.58     | 1.72     | 0.58       |      | 5        | 13         | 1.41E-12 |
| Q9UNY4-1   | Lodestar homolog                                                 | TTF2      |          |          | 0.58     | 1.72     | 0.58       |      | 9        | 11         | 2.60E-52 |
| Q9Y4H4     | Activator of G-protein signaling 4                               | AGS4      | 0.58     |          |          |          | 0.58       |      | 2        | 15         | 7.44E-04 |
| Q9BYD      | 39S ribosomal protein                                            | MRPL1     |          | 0.58     |          |          | 0.58       |      | 2        | 13         | 1.82E-06 |

| UniProt ID | Protein_Name                                                      | Gene Name        | F1 (L/H) | F2 (L/H) | R1 (H/L) | R1 (L/H) | Mean (T/U) | S.D. | Pep. No. | %Seq. Cov. | PEP      |
|------------|-------------------------------------------------------------------|------------------|----------|----------|----------|----------|------------|------|----------|------------|----------|
| 1          | L13, mitochondrial                                                | 3                |          |          |          |          |            |      |          |            |          |
| P61586     | Mitochondrial Rho GTPase 1                                        | RHOT1            |          | 0.54     | 0.62     | 1.61     | 0.58       | 0.06 | 3        | 4.3        | 5.32E-17 |
| Q06945     | Transcription factor SOX-4                                        | SOX4             | 0.67     | 0.49     |          |          | 0.58       | 0.13 | 2        | 12         | 8.57E-03 |
| P37268     | Farnesyl-diphosphate farnesyltransferase                          | FDFT1            | 0.53     | 0.64     | 0.58     | 1.72     | 0.58       | 0.06 | 5        | 15         | 2.96E-75 |
| Q9NPI6     | mRNA-decapping enzyme 1A                                          | DCP1A            |          |          | 0.59     | 1.69     | 0.59       |      | 2        | 5.3        | 9.06E-18 |
| O95486-1   | Protein transport protein Sec24A                                  | SEC24A           |          |          | 0.59     | 1.69     | 0.59       |      | 2        | 2.6        | 4.12E-32 |
| Q2M389     | WASH complex subunit 7                                            | KIAA1033         |          |          | 0.59     | 1.69     | 0.59       |      | 4        | 5.7        | 1.51E-08 |
| Q15058     | Kinesin-like protein KIF14                                        | KIAA0042         |          | 0.59     |          |          | 0.59       |      | 2        | 1.3        | 2.97E-06 |
| O75448     | Activator-recruited cofactor 100 kDa component                    | ARC100           | 0.59     |          |          |          | 0.59       |      | 2        | 2.8        | 6.68E-14 |
| Q9Y2D5-4   | AKAP-KL                                                           | AKAP2            |          | 0.59     |          |          | 0.59       |      | 3        | 2.9        | 2.31E-17 |
| Q14191     | DNA helicase, RecQ-like type 3                                    | RECQ3            | 0.63     |          | 0.55     | 1.82     | 0.59       | 0.06 | 2        | 1.5        | 3.90E-06 |
| A6NED2     | RCC1 domain-containing protein 1                                  | RCCD1            | 0.58     | 0.68     | 0.52     | 1.92     | 0.59       | 0.08 | 3        | 12         | 1.81E-24 |
| O95299     | NADH dehydrogenase ubiquinone 1 alpha subcomplex                  | NDUF A10         | 0.58     |          | 0.61     | 1.64     | 0.60       | 0.02 | 3        | 13         | 1.62E-39 |
| P30281     | G1/S-specific cyclin-D3                                           | CCND3            |          | 0.61     | 0.58     | 1.72     | 0.60       | 0.02 | 2        | 5.5        | 1.39E-03 |
| Q5TCU8     | Tropomyosin 2 (Beta)                                              | RP11-112J3.4-005 | 0.53     | 0.66     |          |          | 0.60       | 0.09 | 13       | 27         | 8.73E-62 |
| Q8ND24     | RING finger protein 214                                           | RNF214           |          |          | 0.60     | 1.67     | 0.60       |      | 2        | 5.8        | 4.83E-22 |
| Q15024     | Exosome complex exonuclease RRP42                                 | EXOSC7           | 0.60     |          |          |          | 0.60       |      | 3        | 13         | 1.18E-70 |
| P63218     | Guanine nucleotide-binding protein G(I)/G(S)/G(O) subunit gamma-5 | GNG5             |          | 0.55     | 0.65     | 1.54     | 0.60       | 0.07 | 3        | 27         | 6.35E-04 |
| Q6RFH5-1   | NOP seven-associated protein 1                                    | NSA1             |          | 0.71     | 0.50     | 2.00     | 0.61       | 0.15 | 3        | 9.4        | 1.97E-20 |
| P84101     | Gastric cancer-related protein VRG107                             | FAM2C            | 0.49     | 0.72     |          |          | 0.61       | 0.16 | 3        | 32         | 1.14E-06 |
| C9JG49     | Protein tyrosine phosphatase, non-receptor type 6, isoform CRA_b  | hCG_25941        | 0.61     | 0.59     | 0.62     | 1.61     | 0.61       | 0.02 | 31       | 62         | 0.00E+00 |
| O60566-3   | MAD3/BUB1-related protein kinase                                  | BUB1B            | 0.55     | 0.69     | 0.59     | 1.69     | 0.61       | 0.07 | 4        | 5.2        | 5.97E-46 |
| Q8WVT3     | Tetratricopeptide repeat protein 15                               | CGI-87           |          | 0.61     |          |          | 0.61       |      | 2        | 2.9        | 8.42E-04 |
| Q5T653     | 39S ribosomal protein                                             | CGI-22           |          | 0.61     |          |          | 0.61       |      | 2        | 7.2        | 1.59E-10 |

| UniProt ID | Protein_Name                                                   | Gene Name        | F1 (L/H) | F2 (L/H) | R1 (H/L) | R1 (L/H) | Mean (T/U) | S.D. | Pep. No. | %Seq. Cov. | PEP      |
|------------|----------------------------------------------------------------|------------------|----------|----------|----------|----------|------------|------|----------|------------|----------|
|            | L2, mitochondrial                                              |                  |          |          |          |          |            |      |          |            |          |
| P50749     | Ras association domain-containing protein 2                    | KIAA0168         |          | 0.61     |          |          | 0.61       |      | 2        | 5.5        | 3.34E-03 |
| Q9UKU7     | Activator-recruited cofactor 42 kDa component                  | ACAD8            |          | 0.61     |          |          | 0.61       |      | 2        | 5.8        | 1.84E-11 |
| P47985     | Complex III subunit 5                                          | UQCRFS1          | 0.61     |          |          |          | 0.61       |      | 9        | 34         | 3.15E-90 |
| Q9ULT8     | E3 ligase for inhibin receptor                                 | HECTD1           | 0.51     | 0.60     | 0.73     | 1.37     | 0.61       | 0.11 | 5        | 2.9        | 2.20E-47 |
| B4DGI9     | cDNA FLJ52589, highly similar to Transcription factor 12       | BHLHB20          | 0.63     | 0.71     | 0.51     | 1.96     | 0.62       | 0.10 | 8        | 20         | 2.07E-90 |
| Q9BZL1     | Ubiquitin-like protein 5                                       | UBL5             | 0.64     | 0.60     |          |          | 0.62       | 0.03 | 3        | 29         | 4.25E-05 |
| Q96A35     | 39S ribosomal protein L24, mitochondrial                       | MRPL24           | 0.62     |          |          |          | 0.62       |      | 2        | 9.3        | 3.32E-08 |
| Q13303-1   | K(+) channel subunit beta-2                                    | KCNA2B           | 0.62     |          |          |          | 0.62       |      | 8        | 38         | 2.18E-55 |
| P56962     | Syntaxin-17                                                    | STX17            | 0.63     | 0.65     | 0.59     | 1.69     | 0.62       | 0.03 | 2        | 11         | 3.45E-42 |
| P51159-1   | GTP-binding protein Ram                                        | RAB27            | 0.67     | 0.54     | 0.66     | 1.52     | 0.62       | 0.07 | 5        | 24         | 1.43E-13 |
| Q5T7F6     | Novel protein                                                  | RP1-153P14.2-002 | 0.61     | 0.64     |          |          | 0.63       | 0.02 | 2        | 7.6        | 1.54E-06 |
| P08670     | Vimentin                                                       | VIM              | 0.54     | 0.54     | 0.80     | 1.25     | 0.63       | 0.15 | 51       | 88         | 0.00E+00 |
| Q10471     | Polypeptide GalNAc transferase 2                               | GALNT2           |          |          | 0.63     | 1.59     | 0.63       |      | 5        | 13         | 8.60E-64 |
| O43678     | NADH dehydrogenase [ubiquinone] 1 alpha subcomplex subunit 2   | NDUFA2           | 0.63     |          |          |          | 0.63       |      | 2        | 31         | 1.74E-04 |
| P22695     | Complex III subunit 2                                          | UQCR2            | 0.47     | 0.47     | 0.96     | 1.04     | 0.63       | 0.28 | 7        | 15         | 4.73E-97 |
| Q96EB1-1   | Elongator complex protein 4                                    | C11orf19         | 0.68     | 0.55     | 0.68     | 1.47     | 0.64       | 0.08 | 4        | 12         | 7.59E-12 |
| Q53H12-1   | Acylglycerol kinase, mitochondrial                             | AGK              | 0.58     | 0.70     |          |          | 0.64       | 0.08 | 3        | 8.1        | 5.85E-08 |
| Q14145     | Cytosolic inhibitor of Nrf2                                    | INRF2            |          |          | 0.64     | 1.56     | 0.64       |      | 2        | 3.4        | 9.76E-06 |
| Q9H814     | Phosphorylated adapter RNA export protein                      | PHAX             |          |          | 0.64     | 1.56     | 0.64       |      | 3        | 10         | 1.59E-14 |
| Q9NZJ0-1   | DDB1- and CUL4-associated factor 2                             | CDT2             |          | 0.64     |          |          | 0.64       |      | 2        | 3          | 2.18E-04 |
| B4E358     | cDNA FLJ54828, highly similar to Src substrate cortactin       | CTTN             |          | 0.64     |          |          | 0.64       |      | 2        | 2.8        | 6.53E-03 |
| P0C7P4     | Putative cytochrome b-c1 complex subunit Rieske-like protein 1 | UQCRFSL1         |          | 0.64     |          |          | 0.64       |      | 3        | 8.8        | 5.35E-04 |
| O00483     | Complex I-MLRQ                                                 | NDUFA4           | 0.64     |          |          |          | 0.64       |      | 4        | 47         | 3.88E-09 |

| UniProt ID | Protein_Name                                                    | Gene Name        | F1 (L/H) | F2 (L/H) | R1 (H/L) | R1 (L/H) | Mean (T/U) | S.D. | Pep. No. | %Seq. Cov. | PEP       |
|------------|-----------------------------------------------------------------|------------------|----------|----------|----------|----------|------------|------|----------|------------|-----------|
| Q8NDI1-1   | EH domain-binding protein 1                                     | EHBP1            | 0.49     | 0.72     | 0.72     | 1.39     | 0.64       | 0.13 | 3        | 3.8        | 5.26E-50  |
| Q96EL3     | 39S ribosomal protein L53, mitochondrial                        | MRPL53           | 0.59     | 0.70     |          |          | 0.65       | 0.08 | 3        | 41         | 9.17E-15  |
| Q9UIC8-2   | Leucine carboxyl methyltransferase 1                            | CGI-68           | 0.57     | 0.72     |          |          | 0.65       | 0.11 | 5        | 13         | 9.89E-07  |
| Q9UPP1-1   | Histone lysine demethylase PHF8                                 | KIAA1111         | 0.73     | 0.56     |          |          | 0.65       | 0.12 | 2        | 2.7        | 8.84E-16  |
| P31930     | Complex III subunit 1                                           | UQCR1            | 0.52     | 0.52     | 0.90     | 1.11     | 0.65       | 0.22 | 11       | 29         | 7.83E-69  |
| P46108-1   | Adapter molecule crk                                            | CRK              | 0.82     | 0.87     | 0.25     | 4.00     | 0.65       | 0.34 | 5        | 29         | 1.47E-136 |
| Q9NP61     | ADP-ribosylation factor GTPase-activating protein 3             | ARFGAP1          | 0.77     | 0.57     | 0.61     | 1.64     | 0.65       | 0.11 | 2        | 4.8        | 4.11E-07  |
| Q96RT1-1   | Densin-180-like protein                                         | ERBB2IP          | 0.65     |          | 0.65     | 1.54     | 0.65       | 0.00 | 3        | 3.9        | 6.35E-16  |
| B7Z6Z4     | cDNA FLJ56329, highly similar to Myosin light polypeptide 6     | MYL6             | 0.62     | 0.65     | 0.68     | 1.47     | 0.65       | 0.03 | 7        | 30         | 1.78E-142 |
| O94830     | DDHD domain-containing protein 2                                | DDHD2            | 0.51     | 0.72     | 0.72     | 1.39     | 0.65       | 0.12 | 3        | 5.2        | 1.34E-11  |
| Q14CJ1     | Amino-terminal enhancer of split                                | AES              | 0.75     |          | 0.55     | 1.82     | 0.65       | 0.14 | 3        | 14         | 1.39E-22  |
| Q9ULW3     | Activator of basal transcription 1                              | ABT1             |          |          | 0.65     | 1.54     | 0.65       |      | 2        | 8.1        | 1.08E-02  |
| Q86UV5     | Deubiquitinating enzyme 48                                      | USP31            |          |          | 0.65     | 1.54     | 0.65       |      | 2        | 3.9        | 3.61E-08  |
| Q5U676     | B3GAT3 protein                                                  | B3GAT3           |          |          | 0.65     | 1.54     | 0.65       |      | 2        | 11         | 7.71E-08  |
| Q9BTA9     | Coiled-coil domain-containing protein 21                        | CCDC21           |          |          | 0.65     | 1.54     | 0.65       |      | 2        | 5.8        | 9.00E-05  |
| B7Z477     | cDNA FLJ55335, highly similar to Tyrosine-protein kinase-like 7 | CCK4             |          | 0.65     |          |          | 0.65       |      | 2        | 2.1        | 1.10E-02  |
| Q9H0U6     | 39S ribosomal protein L18, mitochondrial                        | HSPC071          | 0.65     |          |          |          | 0.65       |      | 3        | 18         | 4.34E-06  |
| P00167     | Cytochrome b5                                                   | CYB5             | 0.65     |          |          |          | 0.65       |      | 2        | 16         | 2.01E-04  |
| Q9BQS8-1   | FYVE and coiled-coil domain-containing protein 1                | FYCO1            | 0.67     |          | 0.65     | 1.54     | 0.66       | 0.01 | 3        | 3          | 1.83E-29  |
| Q9Y448     | Putative TRAF4-associated factor 1                              | C15orf23         | 0.66     | 0.64     | 0.68     | 1.47     | 0.66       | 0.02 | 3        | 11         | 3.84E-32  |
| Q9BXK1     | Basic transcription element-binding protein 4                   | BTEB4            | 0.69     | 0.79     | 0.50     | 2.00     | 0.66       | 0.15 | 3        | 31         | 1.86E-139 |
| A2A305     | Ubiquitin associated protein 2                                  | RP11-176F3.6-005 | 0.79     | 0.69     | 0.50     | 2.00     | 0.66       | 0.15 | 5        | 12         | 2.47E-54  |
| Q71RC2-4   | La ribonucleoprotein domain family                              | LARP4            | 0.78     |          | 0.54     | 1.85     | 0.66       | 0.17 | 4        | 7.5        | 7.42E-27  |



| UniProt ID | Protein_Name                                                                      | Gene Name   | F1 (L/H) | F2 (L/H) | R1 (H/L) | R1 (L/H) | Mean (T/U) | S.D. | Pep. No. | %Seq. Cov. | PEP       |
|------------|-----------------------------------------------------------------------------------|-------------|----------|----------|----------|----------|------------|------|----------|------------|-----------|
|            | member 4                                                                          |             |          |          |          |          |            |      |          |            |           |
| Q4G148-1   | Glucoside xylosyltransferase 1                                                    | GLT8D3      |          |          | 0.66     | 1.52     | 0.66       |      | 2        | 5.7        | 1.14E-02  |
| O75330-3   | Hyaluronan mediated motility receptor                                             | HMMR        |          |          | 0.66     | 1.52     | 0.66       |      | 2        | 4.1        | 6.20E-05  |
| Q5FBY4     | Interferon regulatory factor 3 nirs variant 1                                     | IRF3        |          |          | 0.66     | 1.52     | 0.66       |      | 2        | 6.9        | 1.67E-02  |
| B4DGV1     | cDNA FLJ61589                                                                     | HISPPD1     |          |          | 0.66     | 1.52     | 0.66       |      | 3        | 3.8        | 8.58E-40  |
| Q8IWZ3-4   | Ankyrin repeat and KH domain-containing protein 1                                 | ANKHD1      |          |          | 0.66     | 1.52     | 0.66       |      | 9        | 4.8        | 5.07E-77  |
| Q96DF8     | DiGeorge syndrome critical region 13                                              | DGCR13      |          | 0.66     |          |          | 0.66       |      | 2        | 4.2        | 9.68E-03  |
| P08648     | CD49 antigen-like family member E                                                 | FNRA        |          | 0.66     |          |          | 0.66       |      | 2        | 3.1        | 1.00E-19  |
| P08134     | Rho cDNA clone 9                                                                  | ARH9        | 0.66     |          |          |          | 0.66       |      | 9        | 68         | 4.76E-134 |
| P13051-1   | Uracil-DNA glycosylase                                                            | DGU         |          | 0.69     | 0.65     | 1.54     | 0.67       | 0.03 | 4        | 21         | 5.74E-12  |
| O75146     | Huntingtin-interacting protein 12                                                 | HIP12       | 0.71     |          | 0.63     | 1.59     | 0.67       | 0.06 | 3        | 3.5        | 3.02E-41  |
| Q9Y3P9-1   | GAP and centrosome-associated protein                                             | HSPC094     |          | 0.62     | 0.72     | 1.39     | 0.67       | 0.07 | 4        | 4          | 7.38E-10  |
| P04818     | Thymidylate synthase                                                              | OK/SW-cl.29 | 0.63     | 0.70     | 0.68     | 1.47     | 0.67       | 0.04 | 11       | 51         | 1.96E-167 |
| Q9UJU2-1   | Lymphoid enhancer-binding factor 1                                                | LEF1        | 0.71     | 0.62     | 0.68     | 1.47     | 0.67       | 0.05 | 6        | 18         | 8.34E-20  |
| O15294-1   | O-GlcNAc transferase subunit p110                                                 | OGT         |          | 0.56     | 0.78     | 1.28     | 0.67       | 0.16 | 4        | 5.1        | 1.72E-42  |
| Q9Y5J7     | Mitochondrial import inner membrane translocase subunit Tim9                      | TIM9        |          |          | 0.67     | 1.49     | 0.67       |      | 2        | 26         | 1.21E-06  |
| O60783     | 28S ribosomal protein S14, mitochondrial                                          | MRPS14      |          | 0.67     |          |          | 0.67       |      | 2        | 22         | 6.67E-15  |
| Q53GG0     | Epithelial protein lost in neoplasm beta variant                                  | LIMA1       | 0.67     | 0.68     |          |          | 0.68       | 0.01 | 16       | 28         | 9.61E-149 |
| Q8WXH0-2   | Nesprin-2                                                                         | KIAA1011    | 0.69     |          | 0.66     | 1.52     | 0.68       | 0.02 | 13       | 3          | 7.39E-92  |
| B5BTZ7     | Serine/threonine-protein phosphatase 2A 56 kDa regulatory subunit epsilon isoform | PPP2R5E     | 0.7      | 0.7      | 0.63     | 1.59     | 0.68       | 0.04 | 6        | 16         | 2.15E-18  |
| Q9Y320-1   | Cell proliferation-inducing gene 26 protein                                       | CGI-31      | 0.98     | 1.02     | 0.03     | 33.33    | 0.68       | 0.56 | 4        | 21         | 4.86E-08  |
| Q96R06     | Astrin                                                                            | SPAG5       | 0.66     | 0.67     | 0.71     | 1.41     | 0.68       | 0.03 | 7        | 9.1        | 3.47E-111 |
| P42345     | FK506-binding protein 12-rapamycin complex-associated                             | FRAP        |          |          | 0.68     | 1.47     | 0.68       |      | 4        | 2.2        | 1.89E-20  |

| UniProt ID | Protein_Name                                                          | Gene Name | F1 (L/H) | F2 (L/H) | R1 (H/L) | R1 (L/H) | Mean (T/U) | S.D. | Pep. No. | %Seq. Cov. | PEP       |
|------------|-----------------------------------------------------------------------|-----------|----------|----------|----------|----------|------------|------|----------|------------|-----------|
|            | protein 1                                                             |           |          |          |          |          |            |      |          |            |           |
| Q658Y4     | Protein FAM91A1                                                       | FAM91A1   | 0.68     |          |          |          | 0.68       |      | 2        | 2.9        | 1.67E-15  |
| P17026     | Zinc finger protein 22                                                | KOX15     | 0.69     | 0.68     |          |          | 0.69       | 0.01 | 5        | 29         | 9.24E-10  |
| A8MXL3     | Putative uncharacterized protein ARFGAP2                              | ARFGAP2   |          | 0.66     | 0.71     | 1.41     | 0.69       | 0.04 | 4        | 10         | 7.22E-136 |
| P51965     | UbcH6                                                                 | UBCH6     |          | 0.88     | 0.49     | 2.04     | 0.69       | 0.28 | 3        | 16         | 3.02E-07  |
| Q00613-1   | Heat shock factor protein 1                                           | HSF1      | 0.92     |          | 0.45     | 2.22     | 0.69       | 0.33 | 2        | 8.1        | 4.64E-49  |
| G5IU07     | Putative uncharacterized protein DIAPH3                               | DIAPH3    |          |          | 0.69     | 1.45     | 0.69       |      | 2        | 3          | 3.96E-22  |
| Q8NEM2     | SHC SH2 domain-binding protein 1                                      | SHCBP1    |          |          | 0.69     | 1.45     | 0.69       |      | 3        | 4.5        | 1.69E-21  |
| B7Z3U7     | cDNA FLJ56007, highly similar to Cip1-interacting zinc finger protein | CIZ1      |          |          | 0.69     | 1.45     | 0.69       |      | 5        | 8.2        | 3.17E-26  |
| Q8NG31-1   | ALL1-fused gene from chromosome 15q14 protein                         | CASC5     | 0.69     |          |          |          | 0.69       |      | 2        | 1.1        | 9.52E-09  |
| Q9HBI0-1   | Gamma-parvin                                                          | PARVG     |          | 0.69     |          |          | 0.69       |      | 3        | 8.8        | 2.20E-07  |
| Q8WVK2     | Nucleic acid-binding protein RY-1                                     | SNRNP27   | 0.69     |          |          |          | 0.69       |      | 3        | 18         | 1.51E-63  |
| Q5EBM0-1   | UMP-CMP kinase 2, mitochondrial                                       | CMPK2     |          | 0.69     |          |          | 0.69       |      | 3        | 7.1        | 3.49E-14  |
| Q9P219-1   | Coiled-coil domain-containing protein 88C                             | CCDC88C   |          | 0.69     |          |          | 0.69       |      | 3        | 1.5        | 1.11E-03  |
| Q06787-1   | Fragile X mental retardation 1 protein                                | FMR1      | 0.64     | 0.72     | 0.72     | 1.39     | 0.69       | 0.05 | 3        | 5.2        | 9.44E-06  |
| Q96PK2     | Microtubule-actin cross-linking factor 1, isoform 4                   | ACF7      | 0.42     |          | 0.97     | 1.03     | 0.70       | 0.39 | 44       | 11         | 0.00E+00  |
| P27448-1   | Cdc25C-associated protein kinase 1                                    | CTAK1     |          | 0.63     | 0.76     | 1.32     | 0.70       | 0.09 | 2        | 4.5        | 5.50E-36  |
| Q9BW83-1   | Putative GTP-binding protein RAY-like                                 | RABL4     | 0.72     | 0.69     | 0.69     | 1.45     | 0.70       | 0.02 | 7        | 40         | 1.89E-110 |
| Q12849     | G-rich sequence factor 1                                              | GRSF1     | 0.71     | 0.82     | 0.57     | 1.75     | 0.70       | 0.13 | 6        | 22         | 4.20E-69  |
| Q8TEM1-1   | Nuclear envelope pore membrane protein POM 210                        | KIAA0906  | 0.70     |          | 0.70     | 1.43     | 0.70       | 0.00 | 15       | 10         | 2.71E-64  |
| O94915-1   | ALL1-fused gene from chromosome 4p12 protein                          | AF4P12    | 0.67     |          | 0.73     | 1.37     | 0.70       | 0.04 | 4        | 2.3        | 6.04E-34  |
| B1AKR6     | Dynein, light chain, roadblock-type 1                                 | DYNLRB1   | 0.92     |          | 0.48     | 2.08     | 0.70       | 0.31 | 2        | 19         | 1.12E-12  |
| Q8N6R0     | Methyltransferase-like protein 13                                     | CGI-01    |          |          | 0.70     | 1.43     | 0.70       |      | 2        | 3.4        | 1.71E-44  |
| Q9UHR      | SAP30-binding                                                         | HCNGP     |          |          | 0.70     | 1.43     | 0.70       |      | 2        | 7.5        | 2.09E-30  |

| UniProt ID | Protein_Name                                                                                                                                                    | Gene Name | F1 (L/H) | F2 (L/H) | R1 (H/L) | R1 (L/H) | Mean (T/U) | S.D. | Pep. No. | %Seq. Cov. | PEP       |
|------------|-----------------------------------------------------------------------------------------------------------------------------------------------------------------|-----------|----------|----------|----------|----------|------------|------|----------|------------|-----------|
| 5-1        | protein                                                                                                                                                         |           |          |          |          |          |            |      |          |            |           |
| Q7Z442     | PC1-like 1 protein                                                                                                                                              | PKD1L1    |          |          | 0.70     | 1.43     | 0.70       |      | 2        | 0.5        | 5.52E-02  |
| A6ND70     | Putative uncharacterized protein SSBP2                                                                                                                          | SSBP2     |          | 0.70     |          |          | 0.70       |      | 2        | 6.2        | 5.96E-04  |
| B4DYY7     | cDNA FLJ56809, highly similar to REST corepressor 3                                                                                                             | KIAA1343  |          | 0.70     |          |          | 0.70       |      | 2        | 3.8        | 8.19E-06  |
| Q9HAF1-3   | Chromatin modification-related protein MEAF6                                                                                                                    | C1orf149  | 0.70     |          |          |          | 0.70       |      | 3        | 18         | 6.96E-23  |
| B7Z5W8     | cDNA FLJ55034, highly similar to Dihydrolipoyllysine-residue succinyltransferase component of 2-oxoglutarate dehydrogenase complex, mitochondrial (EC 2.3.1.61) | DLST      | 0.70     |          |          |          | 0.70       |      | 7        | 22         | 2.89E-24  |
| Q9UDY4     | DnaJ homolog subfamily B member 4                                                                                                                               | DNAJB4    | 0.74     | 0.74     | 0.63     | 1.59     | 0.70       | 0.06 | 6        | 21         | 1.15E-59  |
| Q9NRZ9-1   | Lymphoid-specific helicase                                                                                                                                      | HELLS     | 0.62     | 0.59     | 0.90     | 1.11     | 0.70       | 0.17 | 9        | 11         | 2.52E-22  |
| Q2NKX8     | ATP-dependent helicase ERCC6-like                                                                                                                               | ERCC6L    | 0.71     | 1.07     | 0.33     | 3.03     | 0.70       | 0.37 | 3        | 4.1        | 9.30E-21  |
| Q5MIZ7-1   | Serine/threonine-protein phosphatase 4 regulatory subunit 3B                                                                                                    | KIAA1387  | 0.68     |          | 0.73     | 1.37     | 0.71       | 0.04 | 4        | 6.6        | 4.40E-12  |
| O60234     | Glia maturation factor gamma                                                                                                                                    | GMFG      | 0.74     | 0.67     |          |          | 0.71       | 0.05 | 4        | 47         | 5.95E-67  |
| Q03252     | Lamin-B2                                                                                                                                                        | LMN2      | 0.69     | 0.70     | 0.73     | 1.37     | 0.71       | 0.02 | 29       | 45         | 2.47E-223 |
| Q9Y5V3-2   | MAGE tumor antigen CCF                                                                                                                                          | MAGED1    | 0.76     | 0.73     | 0.63     | 1.59     | 0.71       | 0.07 | 5        | 11         | 1.35E-97  |
| O43736     | Integral membrane protein 2A                                                                                                                                    | ITM2A     | 0.69     | 0.55     | 0.88     | 1.14     | 0.71       | 0.17 | 2        | 7.6        | 2.77E-04  |
| Q15022     | Chromatin precipitated E2F target 9 protein                                                                                                                     | CHET9     |          | 0.72     | 0.70     | 1.43     | 0.71       | 0.01 | 5        | 9.1        | 3.40E-26  |
| P61073-2   | C-X-C chemokine receptor type 4                                                                                                                                 | CXCR4     | 0.74     | 0.74     | 0.65     | 1.54     | 0.71       | 0.05 | 3        | 8.7        | 9.83E-171 |
| P23610     | CpG island protein                                                                                                                                              | F8A       |          |          | 0.71     | 1.41     | 0.71       |      | 2        | 11         | 4.57E-07  |
| Q9NUW8     | Tyrosyl-DNA phosphodiesterase 1                                                                                                                                 | TDP1      |          |          | 0.71     | 1.41     | 0.71       |      | 4        | 8.6        | 7.18E-17  |
| Q92731     | similar to protein expressed in prostate, ovary, testis, and placenta 2 isoform 2                                                                               | POTEI     |          |          | 0.71     | 1.41     | 0.71       |      | 9        | 9.5        | 5.32E-34  |
| Q9UIF9-1   | Bromodomain adjacent to zinc finger domain protein 2A                                                                                                           | BAZ2A     | 0.71     |          |          |          | 0.71       |      | 3        | 1.8        | 1.01E-03  |

| UniProt ID | Protein_Name                                                            | Gene Name | F1 (L/H) | F2 (L/H) | R1 (H/L) | R1 (L/H) | Mean (T/U) | S.D. | Pep. No. | %Seq. Cov. | PEP       |
|------------|-------------------------------------------------------------------------|-----------|----------|----------|----------|----------|------------|------|----------|------------|-----------|
| B4DRS6     | cDNA FLJ58980, highly similar to Sideroflexin-3                         | hCG_24661 | 0.71     |          |          |          | 0.71       |      | 3        | 13         | 5.96E-50  |
| Q96G61     | Diadenosine 5,5-P1,P6-hexaphosphate hydrolase 3-beta                    | APS1      | 0.71     |          |          |          | 0.71       |      | 4        | 26         | 1.54E-08  |
| Q12840     | Kinesin heavy chain isoform 5A                                          | KIF5A     | 0.71     |          |          |          | 0.71       |      | 10       | 12         | 5.07E-123 |
| Q9UHB7-1   | AF4/FMR2 family member 4                                                | AF5Q31    | 0.71     | 0.72     |          |          | 0.72       | 0.01 | 3        | 3.4        | 6.04E-17  |
| Q9UBU8-1   | MORF-related gene 15 protein                                            | FWP006    | 0.71     | 0.72     |          |          | 0.72       | 0.01 | 5        | 19         | 1.45E-44  |
| O60880-1   | Duncan disease SH2-protein                                              | DSHP      | 0.73     | 0.70     |          |          | 0.72       | 0.02 | 4        | 33         | 2.03E-18  |
| P57076     | Uncharacterized protein C21orf59                                        | C21orf48  | 0.90     |          | 0.53     | 1.89     | 0.72       | 0.26 | 2        | 15         | 1.92E-12  |
| Q14CA3     | TRIP12 protein                                                          | TRIP12    | 0.75     | 0.77     | 0.63     | 1.59     | 0.72       | 0.08 | 16       | 11         | 9.80E-181 |
| Q9UHB6-1   | Epithelial protein lost in neoplasm                                     | EPLIN     | 0.61     | 0.54     | 1.00     | 1.00     | 0.72       | 0.25 | 16       | 28         | 2.34E-159 |
| P07355-2   | Annexin A2                                                              | ANX2      | 0.46     | 0.51     | 1.18     | 0.85     | 0.72       | 0.40 | 24       | 67         | 0.00E+00  |
| P35453     | Homeobox protein Hox-4I                                                 | HOX4I     |          |          | 0.72     | 1.39     | 0.72       |      | 2        | 12         | 2.60E-17  |
| Q15691     | EB1 protein family member 3                                             | MAPRE3    |          |          | 0.72     | 1.39     | 0.72       |      | 3        | 8.5        | 3.48E-04  |
| A0PJ76     | NCAPD2 protein                                                          | NCAPD2    |          |          | 0.72     | 1.39     | 0.72       |      | 6        | 24         | 3.17E-171 |
| Q9H008     | Phospholysine phosphohistidine inorganic pyrophosphate phosphatase      | LHPP      | 0.72     |          |          |          | 0.72       |      | 2        | 19         | 2.99E-36  |
| Q8NDX6     | OriLyt TD-element-binding protein 7                                     | TB7       | 0.72     |          |          |          | 0.72       |      | 2        | 7.8        | 3.91E-08  |
| A8MU17     | Putative uncharacterized protein TRPT1                                  | TRPT1     |          | 0.72     |          |          | 0.72       |      | 2        | 7.5        | 7.53E-17  |
| Q53H82     | Beta-lactamase-like protein 2                                           | CGI-83    |          | 0.72     |          |          | 0.72       |      | 3        | 11         | 2.91E-08  |
| P32780     | Basic transcription factor 2 62 kDa subunit                             | BTF2      | 0.72     | 0.72     | 0.72     | 1.39     | 0.72       | 0.00 | 2        | 10         | 2.68E-07  |
| Q6KC79-1   | Delangin                                                                | IDN3      | 0.64     | 0.60     | 0.93     | 1.08     | 0.72       | 0.18 | 8        | 4.1        | 9.69E-33  |
| Q9UPN4-1   | 5-azacytidine-induced protein 1                                         | AZI1      |          | 0.82     | 0.63     | 1.59     | 0.73       | 0.13 | 10       | 12         | 1.17E-64  |
| Q8N543-1   | 2-oxoglutarate and iron-dependent oxygenase domain-containing protein 1 | KIAA1612  | 0.95     |          | 0.50     | 2.00     | 0.73       | 0.32 | 2        | 4.4        | 4.43E-78  |
| Q8TCG1-1   | Cancerous inhibitor of PP2A                                             | CIP2A     | 0.93     | 0.72     | 0.53     | 1.89     | 0.73       | 0.20 | 3        | 5.7        | 1.16E-67  |

| UniProt ID | Protein_Name                                                               | Gene Name | F1 (L/H) | F2 (L/H) | R1 (H/L) | R1 (L/H) | Mean (T/U) | S.D. | Pep. No. | %Seq. Cov. | PEP       |
|------------|----------------------------------------------------------------------------|-----------|----------|----------|----------|----------|------------|------|----------|------------|-----------|
| P01116-2   | c-Ki-ras                                                                   | KRAS      | 0.68     | 0.68     | 0.82     | 1.22     | 0.73       | 0.08 | 6        | 36         | 3.54E-75  |
| Q9BZX2-1   | Cytidine monophosphokinase 2                                               | UCK2      | 0.76     | 0.86     | 0.56     | 1.79     | 0.73       | 0.15 | 6        | 29         | 3.35E-32  |
| Q9NS87-1   | Kinesin-like protein 2                                                     | KIF15     | 0.85     | 0.79     | 0.54     | 1.85     | 0.73       | 0.16 | 8        | 7.7        | 2.32E-162 |
| Q5XKP0     | Protein P117                                                               | C19orf70  | 0.69     | 0.75     | 0.75     | 1.33     | 0.73       | 0.03 | 2        | 36         | 4.52E-06  |
| P42167-1   | Lamina-associated polypeptide 2, isoforms beta/gamma                       | LAP2      | 0.76     | 0.79     | 0.64     | 1.56     | 0.73       | 0.08 | 24       | 61         | 1.38E-274 |
| P51948     | CDK7/cyclin-H assembly factor                                              | CAP35     | 0.84     |          | 0.62     | 1.61     | 0.73       | 0.16 | 3        | 14         | 9.76E-33  |
| Q5VT06     | Centrosome-associated protein 350                                          | CAP350    |          |          | 0.73     | 1.37     | 0.73       |      | 2        | 0.6        | 2.38E-02  |
| Q6P179-1   | Endoplasmic reticulum aminopeptidase 2                                     | ERAP2     |          |          | 0.73     | 1.37     | 0.73       |      | 2        | 2.6        | 1.37E-06  |
| Q5T0F9-2   | Coiled-coil and C2 domain-containing protein 1B                            | CC2D1B    |          |          | 0.73     | 1.37     | 0.73       |      | 2        | 4.3        | 1.10E-02  |
| Q9UJW0     | Dynactin subunit 4                                                         | DCTN4     |          |          | 0.73     | 1.37     | 0.73       |      | 2        | 6.2        | 6.54E-04  |
| P56270     | Myc-associated zinc finger protein                                         | MAZ       |          |          | 0.73     | 1.37     | 0.73       |      | 3        | 9.1        | 3.38E-08  |
| Q8WVM7     | Cohesin subunit SA-1                                                       | SA1       |          |          | 0.73     | 1.37     | 0.73       |      | 4        | 2.4        | 1.13E-07  |
| Q8NEZ2-1   | ESCRT-I complex subunit VPS37A                                             | HCRP1     | 0.73     |          |          |          | 0.73       |      | 2        | 9.1        | 2.13E-46  |
| P07305     | Histone H1                                                                 | H1F0      | 0.73     |          |          |          | 0.73       |      | 2        | 12         | 4.35E-11  |
| Q5TZW1     | Src-like-adaptor                                                           | SLA       | 0.73     |          |          |          | 0.73       |      | 2        | 20         | 2.80E-03  |
| Q8N1F0     | Serine/threonine-protein phosphatase                                       | hCG_18332 |          | 0.73     |          |          | 0.73       |      | 3        | 6.1        | 1.39E-07  |
| Q96K21-1   | MLL partner containing FYVE domain                                         | MPFYVE    | 0.73     |          |          |          | 0.73       |      | 3        | 8.7        | 3.94E-04  |
| Q96DV4     | 39S ribosomal protein L38, mitochondrial                                   | HSPC262   | 0.73     |          |          |          | 0.73       |      | 3        | 6.1        | 2.68E-09  |
| Q12968-1   | NFATx                                                                      | NFAT4     | 0.73     |          |          |          | 0.73       |      | 4        | 5.1        | 3.56E-13  |
| Q92538     | Golgi-specific brefeldin A-resistance guanine nucleotide exchange factor 1 | GBF1      |          | 0.73     |          |          | 0.73       |      | 7        | 4.6        | 7.00E-67  |
| Q8WWI1-1   | F-box only protein 20                                                      | FBX20     | 0.65     | 0.60     | 0.95     | 1.05     | 0.73       | 0.19 | 5        | 5.8        | 1.30E-38  |
| Q5T1Z8     | Pumilio homolog 1 (Drosophila)                                             | hCG_19946 | 0.59     | 0.55     | 1.06     | 0.94     | 0.73       | 0.28 | 7        | 7.5        | 5.81E-32  |
| Q9HBM1     | Kinetochore protein Spc25                                                  | AD024     | 0.88     |          | 0.59     | 1.69     | 0.74       | 0.21 | 4        | 19         | 2.75E-06  |
| Q8N0X      | Spartin                                                                    | KIAA0     | 0.74     | 0.76     | 0.71     | 1.41     | 0.74       | 0.03 | 6        | 13         | 8.36E-91  |

| UniProt ID | Protein_Name                                                                        | Gene Name       | F1 (L/H) | F2 (L/H) | R1 (H/L) | R1 (L/H) | Mean (T/U) | S.D. | Pep. No. | %Seq. Cov. | PEP       |
|------------|-------------------------------------------------------------------------------------|-----------------|----------|----------|----------|----------|------------|------|----------|------------|-----------|
| 7          |                                                                                     | 610             |          |          |          |          |            |      |          |            |           |
| Q9NPD8     | Cell proliferation-inducing gene 50 protein                                         | HSPC150         | 0.80     | 0.65     | 0.76     | 1.32     | 0.74       | 0.08 | 3        | 17         | 9.08E-16  |
| Q9UPN9-1   | E3 ubiquitin-protein ligase TRIM33                                                  | KIAA1113        | 0.56     | 0.63     | 1.02     | 0.98     | 0.74       | 0.25 | 5        | 5.3        | 1.50E-39  |
| Q8IX01-1   | Arginine/serine-rich splicing factor 14                                             | KIAA0365        | 0.73     | 0.69     | 0.8      | 1.25     | 0.74       | 0.06 | 26       | 35         | 2.03E-148 |
| Q9NUQ3     | Gamma-taxilin                                                                       | CXorf15         | 0.58     | 0.92     | 0.72     | 1.39     | 0.74       | 0.17 | 4        | 9.1        | 1.21E-12  |
| B4DT73     | cDNA FLJ56409, highly similar to Serine/threonine-protein kinase Chk1 (EC 2.7.11.1) | CHEK1           | 0.78     | 0.89     | 0.55     | 1.82     | 0.74       | 0.17 | 2        | 4.9        | 3.02E-13  |
| O95379-1   | Head and neck tumor and metastasis-related protein                                  | TNFAIP8         | 0.73     | 0.75     |          |          | 0.74       | 0.01 | 3        | 28         | 3.56E-120 |
| O95801     | Tetratricopeptide repeat protein 4                                                  | My044           | 0.79     |          | 0.69     | 1.45     | 0.74       | 0.07 | 4        | 10         | 3.17E-10  |
| B1AJQ6     | Syntaxin 12                                                                         | RP3-426I6.4-002 | 0.64     | 0.84     |          |          | 0.74       | 0.14 | 3        | 14         | 1.17E-15  |
| Q9UQN3     | Charged multivesicular body protein 2b                                              | CGI-84          | 0.91     | 0.57     |          |          | 0.74       | 0.24 | 3        | 15         | 7.47E-12  |
| Q9NRG9     | Adracalin                                                                           | AAAS            |          |          | 0.74     | 1.35     | 0.74       |      | 2        | 5.7        | 1.30E-34  |
| Q12802-2   | AKAP-Lbc                                                                            | AKAP13          |          |          | 0.74     | 1.35     | 0.74       |      | 2        | 2.1        | 1.88E-02  |
| Q01167-1   | Cellular transcription factor ILF-1                                                 | FOXK2           |          |          | 0.74     | 1.35     | 0.74       |      | 3        | 8.9        | 1.14E-31  |
| Q9H6N6     | cDNA: FLJ22037 fis, clone HEP08868                                                  | MYH16           |          |          | 0.74     | 1.35     | 0.74       |      | 3        | 4          | 9.82E-08  |
| O60879-1   | Diaphanous-related formin-2                                                         | DIA             |          |          | 0.74     | 1.35     | 0.74       |      | 4        | 4.4        | 4.49E-24  |
| Q969P6     | DNA topoisomerase I, mitochondrial                                                  | TOP1MT          |          | 0.74     |          |          | 0.74       |      | 2        | 2.8        | 8.12E-08  |
| Q7Z7A4-1   | Modulator of Na,K-ATPase                                                            | PXK             | 0.74     |          |          |          | 0.74       |      | 2        | 4.8        | 1.57E-08  |
| Q99547     | M-phase phosphoprotein 6                                                            | MPHOSPH6        | 0.74     |          |          |          | 0.74       |      | 3        | 17         | 2.10E-03  |
| Q9Y5N6     | Origin recognition complex subunit 6                                                | ORC6            | 0.74     | 0.71     | 0.78     | 1.28     | 0.74       | 0.04 | 4        | 15         | 1.92E-15  |
| O14976     | Cyclin-G-associated kinase                                                          | GAK             | 0.79     | 0.91     | 0.53     | 1.89     | 0.74       | 0.19 | 4        | 6          | 1.94E-25  |
| Q659G1     | Ankyrin repeat and MYND domain-containing protein 2                                 | ANKMY2          | 0.66     | 0.83     |          |          | 0.75       | 0.12 | 2        | 4.8        | 2.07E-07  |
| Q15057     | Arf-GAP with coiled-coil, ANK repeat and PH domain-containing protein 2             | ACAP2           | 0.68     | 0.61     | 0.95     | 1.05     | 0.75       | 0.18 | 4        | 6.8        | 4.18E-57  |

| UniProt ID | Protein_Name                                                | Gene Name | F1 (L/H) | F2 (L/H) | R1 (H/L) | R1 (L/H) | Mean (T/U) | S.D. | Pep. No. | %Seq. Cov. | PEP       |
|------------|-------------------------------------------------------------|-----------|----------|----------|----------|----------|------------|------|----------|------------|-----------|
| Q9H9J2     | 39S ribosomal protein L44, mitochondrial                    | MRPL44    | 0.72     | 0.78     |          |          | 0.75       | 0.04 | 2        | 11         | 1.51E-20  |
| Q8N6T3-2   | ADP-ribosylation factor 1 GTPase-activating protein         | ARF1GAP   | 0.61     | 0.74     | 0.90     | 1.11     | 0.75       | 0.15 | 2        | 5.6        | 5.85E-13  |
| Q15738     | Sterol-4-alpha-carboxylate 3-dehydrogenase, decarboxylating | H105E3    | 1.17     |          | 0.33     | 3.03     | 0.75       | 0.59 | 5        | 17         | 5.33E-31  |
| Q96AX1     | Vacuolar protein sorting-associated protein 33A             | VPS33A    | 1.22     |          | 0.28     | 3.57     | 0.75       | 0.66 | 2        | 8.6        | 3.36E-11  |
| Q96I15-1   | Selenocysteine lyase                                        | SCLY      |          |          | 0.75     | 1.33     | 0.75       |      | 2        | 8.8        | 1.48E-11  |
| F4WIY2     | UPF0399 protein C6orf153                                    | C6orf153  |          |          | 0.75     | 1.33     | 0.75       |      | 2        | 3.9        | 9.15E-03  |
| O75363     | Amplified in breast cancer protein 1                        | ABC1      |          |          | 0.75     | 1.33     | 0.75       |      | 2        | 2.5        | 5.98E-15  |
| Q9UBW7     | Fused in myeloproliferative disorders protein               | FIM       |          | 0.75     |          |          | 0.75       |      | 2        | 1.5        | 2.19E-05  |
| C9J2A4     | Ewings sarcoma EWS-Fli1 (Type 1) oncogene                   | FLI1      |          | 0.75     |          |          | 0.75       |      | 2        | 6.1        | 5.82E-06  |
| P01112     | GTPase HRas                                                 | HRAS      | 0.75     |          |          |          | 0.75       |      | 4        | 33         | 6.24E-29  |
| P62834     | C21KG                                                       | KREV1     |          | 0.75     |          |          | 0.75       |      | 6        | 38         | 6.66E-79  |
| O60313-2   | Dynamamin-like 120 kDa protein, form S1                     | KIAA0567  | 0.86     | 0.87     | 0.53     | 1.89     | 0.75       | 0.19 | 4        | 4.8        | 5.50E-12  |
| Q59H50     | Integrin beta                                               | ITGB2     | 0.76     |          | 0.75     | 1.33     | 0.76       | 0.01 | 9        | 24         | 9.34E-153 |
| Q96MF7     | E3 SUMO-protein ligase NSE2                                 | C8orf36   | 0.78     |          | 0.73     | 1.37     | 0.76       | 0.04 | 2        | 14         | 7.17E-47  |
| Q9UBK9     | Androgen receptor trapped clone 27 protein                  | HSPC024   | 0.72     | 0.79     |          |          | 0.76       | 0.05 | 2        | 16         | 6.86E-24  |
| Q14444-1   | Caprin-1                                                    | CAPRI1    | 0.76     | 0.73     | 0.78     | 1.28     | 0.76       | 0.03 | 18       | 27         | 1.54E-256 |
| Q9UK76-2   | Androgen-regulated protein 2                                | ARM2      | 0.83     | 0.69     | 0.75     | 1.33     | 0.76       | 0.07 | 3        | 22         | 4.22E-40  |
| Q53QZ3     | ArhGAP15                                                    | ARHGAP15  | 0.59     | 0.70     | 0.98     | 1.02     | 0.76       | 0.20 | 5        | 13         | 4.11E-74  |
| O75179-1   | Ankyrin repeat domain-containing protein 17                 | ANKRD17   | 0.85     | 0.93     | 0.49     | 2.04     | 0.76       | 0.23 | 13       | 6.6        | 4.25E-115 |
| Q01826-2   | DNA-binding protein SATB1                                   | SATB1     | 0.58     | 0.60     | 1.09     | 0.92     | 0.76       | 0.29 | 13       | 26         | 8.17E-73  |
| Q96CX6     | Leucine-rich repeat-containing protein 58                   | LRRC58    | 0.82     |          | 0.70     | 1.43     | 0.76       | 0.08 | 4        | 16         | 2.98E-38  |
| P25311     | Zinc-alpha-2-glycoprotein                                   | AZGP1     |          |          | 0.76     | 1.32     | 0.76       |      | 2        | 11         | 4.44E-04  |
| Q9NVU0-1   | DNA-directed RNA polymerase III 80 kDa polypeptide          | KIAA1452  |          |          | 0.76     | 1.32     | 0.76       |      | 2        | 4.5        | 5.15E-03  |

| UniProt ID | Protein_Name                                                                                                             | Gene Name | F1 (L/H) | F2 (L/H) | R1 (H/L) | R1 (L/H) | Mean (T/U) | S.D. | Pep. No. | %Seq. Cov. | PEP       |
|------------|--------------------------------------------------------------------------------------------------------------------------|-----------|----------|----------|----------|----------|------------|------|----------|------------|-----------|
| Q8TEY7     | Deubiquitinating enzyme 1                                                                                                | USP1      |          |          | 0.76     | 1.32     | 0.76       |      | 2        | 3.6        | 5.11E-03  |
| Q14CB8-2   | Rho GTPase-activating protein 19                                                                                         | ARHGAP19  |          |          | 0.76     | 1.32     | 0.76       |      | 2        | 5.2        | 4.66E-05  |
| P49840     | Glycogen synthase kinase-3 alpha                                                                                         | GSK3A     |          |          | 0.76     | 1.32     | 0.76       |      | 3        | 10         | 1.05E-15  |
| O14981     | ATP-dependent helicase BTAFL                                                                                             | BTAFL     |          |          | 0.76     | 1.32     | 0.76       |      | 4        | 3.3        | 5.69E-21  |
| P35520-2   | Beta-thionase                                                                                                            | CBS       |          |          | 0.76     | 1.32     | 0.76       |      | 4        | 8.1        | 1.14E-80  |
| Q96L92-1   | Sorting nexin-27                                                                                                         | KIAA0488  |          |          | 0.76     | 1.32     | 0.76       |      | 4        | 13         | 3.43E-06  |
| Q9BYC9     | 39S ribosomal protein L20, mitochondrial                                                                                 | MRPL20    |          | 0.76     |          |          | 0.76       |      | 2        | 13         | 1.41E-11  |
| Q9NVX0-1   | Centrosomal protein of 27 kDa                                                                                            | C15orf25  | 0.76     |          |          |          | 0.76       |      | 2        | 11         | 1.48E-04  |
| O75496     | Geminin                                                                                                                  | GMNN      |          | 0.76     |          |          | 0.76       |      | 2        | 9.1        | 3.22E-03  |
| A8MST8     | Putative uncharacterized protein NKIRAS2                                                                                 | NKIRAS2   | 0.76     |          |          |          | 0.76       |      | 2        | 9.6        | 1.01E-04  |
| A6NCK0     | Putative uncharacterized protein NAE1                                                                                    | NAE1      |          | 0.76     |          |          | 0.76       |      | 7        | 14         | 2.35E-100 |
| Q96RP9-2   | Elongation factor G 1, mitochondrial                                                                                     | EFG       | 0.71     | 0.78     | 0.79     | 1.27     | 0.76       | 0.04 | 2        | 5.6        | 1.35E-07  |
| Q15398-2   | Discs large homolog 7                                                                                                    | DLG7      | 0.85     | 0.69     | 0.74     | 1.35     | 0.76       | 0.08 | 7        | 12         | 9.38E-19  |
| Q9NVN8     | Guanine nucleotide-binding protein-like 3-like protein                                                                   | GNL3L     | 0.88     | 0.84     | 0.56     | 1.79     | 0.76       | 0.17 | 5        | 9.8        | 2.72E-20  |
| P78332     | Lung cancer antigen NY-LU-12                                                                                             | DEF3      | 0.70     | 0.77     | 0.82     | 1.22     | 0.76       | 0.06 | 4        | 4.5        | 1.98E-29  |
| P60520     | GABA(A) receptor-associated protein-like 2                                                                               | FLC3A     | 0.94     | 0.74     | 0.61     | 1.64     | 0.76       | 0.17 | 7        | 56         | 2.82E-66  |
| P23921     | Ribonucleoside-diphosphate reductase large subunit                                                                       | RR1       | 0.87     | 0.93     | 0.49     | 2.04     | 0.76       | 0.24 | 13       | 23         | 2.04E-115 |
| Q96A49     | Synapse-associated protein 1                                                                                             | PRO313    | 0.76     |          | 0.77     | 1.30     | 0.77       | 0.01 | 2        | 8.2        | 1.41E-52  |
| Q6ZNE4     | cDNA FLJ16180 fis, clone BRHIP3000240, highly similar to Homo sapiens potassium channel beta 2 subunit (HKvbeta2.2) mRNA | KCNAB2    |          | 0.62     | 0.91     | 1.10     | 0.77       | 0.21 | 5        | 19         | 6.16E-11  |
| Q96EH3     | Uncharacterized protein C7orf30                                                                                          | C7orf30   | 0.97     |          | 0.56     | 1.79     | 0.77       | 0.29 | 2        | 24         | 4.02E-14  |
| B3KSP9     | cDNA FLJ36765 fis, clone 3NB691000191                                                                                    | AARSD1    |          | 0.55     | 0.98     | 1.02     | 0.77       | 0.30 | 3        | 7.7        | 9.53E-72  |
| Q9Y5L4     | Mitochondrial import inner membrane                                                                                      | TIM13B    | 1.04     |          | 0.49     | 2.04     | 0.77       | 0.39 | 3        | 39         | 2.49E-29  |



| UniProt ID | Protein_Name                                                                                                         | Gene Name  | F1 (L/H) | F2 (L/H) | R1 (H/L) | R1 (L/H) | Mean (T/U) | S.D. | Pep. No. | %Seq. Cov. | PEP       |
|------------|----------------------------------------------------------------------------------------------------------------------|------------|----------|----------|----------|----------|------------|------|----------|------------|-----------|
|            | translocase subunit Tim13                                                                                            |            |          |          |          |          |            |      |          |            |           |
| Q9UPN3-2   | 620 kDa actin-binding protein                                                                                        | ABP620     | 0.71     | 0.63     | 0.97     | 1.03     | 0.77       | 0.18 | 46       | 13         | 0.00E+00  |
| Q9NZD2     | Glycolipid transfer protein                                                                                          | GLTP       | 0.76     | 0.78     |          |          | 0.77       | 0.01 | 2        | 10         | 2.48E-34  |
| O95249     | 28 kDa cis-Golgi SNARE p28                                                                                           | GOSR1      | 0.80     | 0.77     | 0.74     | 1.35     | 0.77       | 0.03 | 2        | 10         | 3.30E-11  |
| Q8TAE8     | CKII beta-associating protein                                                                                        | GADD45GIP1 | 0.80     |          | 0.74     | 1.35     | 0.77       | 0.04 | 5        | 33         | 3.74E-23  |
| P07205     | Phosphoglycerate kinase 2                                                                                            | PGK2       | 0.74     | 0.80     |          |          | 0.77       | 0.04 | 9        | 18         | 4.52E-88  |
| Q8TDP1     | ribonuclease H2 subunit B isoform 2                                                                                  | RNASEH2B   | 0.85     |          | 0.69     | 1.45     | 0.77       | 0.11 | 10       | 45         | 1.50E-41  |
| Q9Y6W5     | Protein WAVE-2                                                                                                       | WASF2      | 0.86     | 0.68     |          |          | 0.77       | 0.13 | 5        | 16         | 2.70E-34  |
| P05423     | DNA-directed RNA polymerase III subunit D                                                                            | BN51       | 0.69     | 0.93     | 0.69     | 1.45     | 0.77       | 0.14 | 2        | 4.8        | 1.59E-03  |
| B2R8P1     | cDNA, FLJ93994, highly similar to Homo sapiens phosphate cytidyltransferase 1, choline, alpha isoform (PCYT1A), mRNA | PCYT1A     | 0.87     |          | 0.67     | 1.49     | 0.77       | 0.14 | 4        | 15         | 5.70E-55  |
| Q86U44-1   | Methyltransferase-like protein 3                                                                                     | METTL3     | 0.71     | 1.11     | 0.49     | 2.04     | 0.77       | 0.31 | 3        | 8.4        | 2.50E-08  |
| P55039     | Developmentally-regulated GTP-binding protein 2                                                                      | DRG2       | 1.15     | 0.31     | 0.85     | 1.18     | 0.77       | 0.43 | 5        | 16         | 1.26E-77  |
| P48651     | Phosphatidylserine synthase 1                                                                                        | KIAA0024   |          |          | 0.77     | 1.30     | 0.77       |      | 2        | 5.1        | 6.62E-07  |
| P07996     | Thrombospondin-1                                                                                                     | THBS1      |          |          | 0.77     | 1.30     | 0.77       |      | 2        | 2          | 4.12E-03  |
| O75962     | PTPRF-interacting protein                                                                                            | TRIO       |          |          | 0.77     | 1.30     | 0.77       |      | 3        | 1.5        | 2.62E-11  |
| Q96A08     | Histone H2B type 1-A                                                                                                 | HIST1H2BA  |          |          | 0.77     | 1.30     | 0.77       |      | 7        | 47         | 2.34E-35  |
| Q13033-1   | Cell cycle autoantigen SG2NA                                                                                         | GS2NA      |          | 0.77     |          |          | 0.77       |      | 2        | 1.9        | 3.00E-02  |
| Q96CB9-1   | NOL1/NOP2/Sun domain family member 4                                                                                 | NSUN4      |          | 0.77     |          |          | 0.77       |      | 2        | 5.7        | 1.70E-10  |
| Q13588     | GRB2-related adapter protein                                                                                         | GRAP       |          | 0.77     |          |          | 0.77       |      | 3        | 9.7        | 6.20E-03  |
| Q9UP83-2   | 13S Golgi transport complex 90 kDa subunit                                                                           | COG5       |          | 0.77     |          |          | 0.77       |      | 3        | 3.6        | 2.88E-07  |
| P20671     | Histone H2A type 1-D                                                                                                 | H2AFG      |          | 0.77     |          |          | 0.77       |      | 7        | 32         | 1.14E-108 |
| Q14318-1   | 38 kDa FK506-binding protein                                                                                         | FKBP38     | 0.74     | 0.74     | 0.84     | 1.19     | 0.77       | 0.06 | 9        | 22         | 2.97E-77  |
| Q9UEE9-1   | Bucentaur                                                                                                            | BCNT       | 0.70     | 0.72     | 0.90     | 1.11     | 0.77       | 0.11 | 4        | 18         | 5.14E-26  |

| UniProt ID | Protein_Name                                                                                 | Gene Name | F1 (L/H) | F2 (L/H) | R1 (H/L) | R1 (L/H) | Mean (T/U) | S.D. | Pep. No. | %Seq. Cov. | PEP       |
|------------|----------------------------------------------------------------------------------------------|-----------|----------|----------|----------|----------|------------|------|----------|------------|-----------|
| Q9BV38     | WD repeat-containing protein 18                                                              | WDR18     | 0.70     |          | 0.85     | 1.18     | 0.78       | 0.11 | 2        | 4.2        | 3.40E-04  |
| Q14331     | FSHD region gene 1 protein                                                                   | FRG1      | 1.17     |          | 0.38     | 2.63     | 0.78       | 0.56 | 2        | 9.7        | 3.47E-14  |
| Q68EM7-1   | Rho GTPase-activating protein 17                                                             | ARHGAP17  | 0.80     |          | 0.75     | 1.33     | 0.78       | 0.04 | 3        | 5.4        | 4.78E-05  |
| Q2TAM5     | Nuclear factor NF-kappa-B p65 subunit                                                        | RELA      | 0.66     |          | 0.89     | 1.12     | 0.78       | 0.16 | 3        | 9          | 1.86E-06  |
| Q9UQR1     | Transcription factor ZBP-89                                                                  | ZBP89     |          | 0.64     | 0.91     | 1.10     | 0.78       | 0.19 | 2        | 3.8        | 4.53E-13  |
| Q96BY6-1   | Dedicator of cytokinesis protein 10                                                          | DOCK10    | 0.60     | 0.85     | 0.88     | 1.14     | 0.78       | 0.15 | 7        | 5          | 6.07E-50  |
| P11274-1   | Breakpoint cluster region protein                                                            | BCR       | 0.49     | 0.88     | 0.96     | 1.04     | 0.78       | 0.25 | 4        | 5.8        | 1.40E-33  |
| Q99622     | Protein C10                                                                                  | C10       | 0.57     | 0.49     | 1.27     | 0.79     | 0.78       | 0.43 | 5        | 58         | 5.13E-79  |
| P52732     | Kinesin-like protein 1                                                                       | EG5       | 0.76     | 0.79     | 0.79     | 1.27     | 0.78       | 0.02 | 26       | 34         | 5.63E-257 |
| Q9UJU6-1   | Cervical mucin-associated protein                                                            | CMAP      | 0.76     | 0.81     | 0.77     | 1.30     | 0.78       | 0.03 | 10       | 29         | 2.03E-138 |
| Q53GI2     | Testis expressed sequence 264 variant                                                        | TEX264    | 0.79     | 0.81     | 0.74     | 1.35     | 0.78       | 0.04 | 5        | 17         | 1.06E-18  |
| Q99590-1   | CTD-associated SR protein 11                                                                 | CASP11    | 0.67     | 0.85     | 0.82     | 1.22     | 0.78       | 0.10 | 7        | 5.5        | 7.35E-65  |
| O00221     | I-kappa-B-epsilon                                                                            | IKBE      | 0.72     | 0.70     | 0.92     | 1.09     | 0.78       | 0.12 | 2        | 8          | 7.43E-07  |
| Q9Y4R8     | Protein clk-2 homolog                                                                        | KIAA0683  | 0.59     | 1.12     | 0.63     | 1.59     | 0.78       | 0.30 | 5        | 9.6        | 3.67E-47  |
| Q92854     | A8                                                                                           | CD100     | 0.43     |          | 1.13     | 0.88     | 0.78       | 0.49 | 2        | 3.5        | 1.41E-18  |
| Q9NUQ8-1   | ATP-binding cassette sub-family F member 3                                                   | ABCF3     |          | 0.85     | 0.71     | 1.41     | 0.78       | 0.10 | 5        | 7.3        | 1.83E-20  |
| Q9H1A4     | Anaphase-promoting complex subunit 1                                                         | ANAPC1    |          | 1.01     | 0.55     | 1.82     | 0.78       | 0.33 | 3        | 2.5        | 3.61E-21  |
| Q96FZ7     | Charged multivesicular body protein 6                                                        | CHMP6     |          | 1.03     | 0.53     | 1.89     | 0.78       | 0.35 | 3        | 14         | 5.32E-27  |
| A8MWR0     | cDNA FLJ58961, highly similar to APAF1-interacting protein                                   | APIP      |          |          | 0.78     | 1.28     | 0.78       |      | 2        | 10         | 6.10E-06  |
| A8K6A2     | cDNA FLJ77317, highly similar to Homo sapiens retinoblastoma binding protein 7 (RBBP7), mRNA | RBBP7     |          |          | 0.78     | 1.28     | 0.78       |      | 10       | 27         | 5.27E-102 |
| Q16594     | RNA polymerase II TBP-associated factor subunit G                                            | TAF2G     | 0.78     |          |          |          | 0.78       |      | 2        | 11         | 2.41E-10  |
| Q9UL26     | Ras-related protein Rab-22A                                                                  | RAB22     | 0.78     |          |          |          | 0.78       |      | 2        | 16         | 1.61E-05  |
| O75616-1   | Conserved ERA-like GTPase                                                                    | ERAL1     |          | 0.78     |          |          | 0.78       |      | 2        | 4.3        | 2.45E-04  |

| UniProt ID | Protein_Name                                                                                                                    | Gene Name | F1 (L/H) | F2 (L/H) | R1 (H/L) | R1 (L/H) | Mean (T/U) | S.D. | Pep. No. | %Seq. Cov. | PEP       |
|------------|---------------------------------------------------------------------------------------------------------------------------------|-----------|----------|----------|----------|----------|------------|------|----------|------------|-----------|
| P83436     | Component of oligomeric Golgi complex 7                                                                                         | COG7      |          | 0.78     |          |          | 0.78       |      | 2        | 2.5        | 1.77E-08  |
| B4DQP1     | cDNA FLJ58045, highly similar to NADH dehydrogenase (ubiquinone) 1 alpha subcomplex subunit 13 (EC 1.6.5.3)                     | NDUF A13  |          | 0.78     |          |          | 0.78       |      | 2        | 8.8        | 2.28E-03  |
| Q9H9B1-3   | Euchromatic histone-lysine N-methyltransferase 1                                                                                | EHMT1     | 0.78     |          |          |          | 0.78       |      | 2        | 2.2        | 4.42E-03  |
| Q9Y3P8     | SHP2-interacting transmembrane adapter protein                                                                                  | SIT       | 0.71     | 0.88     | 0.76     | 1.32     | 0.78       | 0.09 | 3        | 26         | 1.52E-65  |
| Q7Z7F5     | Excision repair cross-complementing rodent repair deficiency, complementation group 1 (Includes overlapping antisense sequence) | ERCC1     | 0.70     | 0.95     | 0.70     | 1.43     | 0.78       | 0.14 | 2        | 9          | 1.62E-05  |
| Q14008-3   | Colonic and hepatic tumor over-expressed gene protein                                                                           | CKAP5     | 0.78     | 0.77     | 0.80     | 1.25     | 0.78       | 0.02 | 40       | 26         | 3.40E-246 |
| Q9NRS6-1   | Sorting nexin-15                                                                                                                | SNX15     | 0.68     | 0.99     | 0.68     | 1.47     | 0.78       | 0.18 | 2        | 6.4        | 1.60E-04  |
| Q15628     | TNFRSF1A-associated via death domain                                                                                            | TRAD D    | 0.71     | 1.00     | 0.64     | 1.56     | 0.78       | 0.19 | 2        | 8.3        | 1.84E-03  |
| Q5T6F2     | Ubiquitin-associated protein 2                                                                                                  | KIAA1491  | 0.76     | 1.00     | 0.59     | 1.69     | 0.78       | 0.21 | 6        | 10         | 2.06E-54  |
| P15923-1   | Class B basic helix-loop-helix protein 21                                                                                       | BHLHB21   | 0.46     | 0.45     | 1.44     | 0.69     | 0.78       | 0.57 | 7        | 17         | 4.21E-64  |
| O14965     | Aurora kinase A                                                                                                                 | AIK       |          | 0.88     | 0.69     | 1.45     | 0.79       | 0.13 | 2        | 7.4        | 1.30E-31  |
| Q8IW19-1   | MAX dimerization protein 5                                                                                                      | KIAA0518  | 0.90     |          | 0.67     | 1.49     | 0.79       | 0.16 | 3        | 1.5        | 2.29E-05  |
| Q14157-2   | Protein NICE-4                                                                                                                  | KIAA0144  | 0.74     | 0.76     | 0.86     | 1.16     | 0.79       | 0.06 | 16       | 23         | 1.15E-296 |
| P49815-1   | Tuberin                                                                                                                         | TSC2      | 0.69     | 0.81     | 0.86     | 1.16     | 0.79       | 0.09 | 3        | 2.7        | 2.09E-31  |
| B8ZWD6     | Diazepam binding inhibitor, splice form 1G                                                                                      | DBI       | 0.83     | 0.87     | 0.66     | 1.52     | 0.79       | 0.11 | 2        | 18         | 1.10E-15  |
| Q9HB21     | Pleckstrin homology domain-containing family A member 1                                                                         | PLEKH A1  | 0.68     | 0.68     | 1.00     | 1.00     | 0.79       | 0.18 | 4        | 14         | 2.22E-27  |
| Q13084     | 39S ribosomal protein L28, mitochondrial                                                                                        | MAAT1     | 0.78     |          | 0.80     | 1.25     | 0.79       | 0.01 | 3        | 22         | 3.33E-125 |
| Q8NFU3-1   | Thiosulfate sulfurtransferase/rhodanese-like domain-containing protein 1                                                        | KAT       | 0.80     | 0.78     |          |          | 0.79       | 0.01 | 2        | 12         | 1.58E-05  |
| O43432     | eIF-4-gamma II                                                                                                                  | EIF4G3    | 0.77     | 0.75     | 0.85     | 1.18     | 0.79       | 0.05 | 14       | 9.8        | 8.81E-50  |

| UniProt ID | Protein_Name                                                  | Gene Name     | F1 (L/H) | F2 (L/H) | R1 (H/L) | R1 (L/H) | Mean (T/U) | S.D. | Pep. No. | %Seq. Cov. | PEP       |
|------------|---------------------------------------------------------------|---------------|----------|----------|----------|----------|------------|------|----------|------------|-----------|
| -1         |                                                               |               |          |          |          |          |            |      |          |            |           |
| P51398     | 28S ribosomal protein S29, mitochondrial                      | DAP3          | 0.83     | 0.71     | 0.83     | 1.20     | 0.79       | 0.07 | 5        | 21         | 4.28E-52  |
| Q9NXX6-1   | Non-structural maintenance of chromosomes element 4 homolog A | C10orf86      | 0.74     |          | 0.84     | 1.19     | 0.79       | 0.07 | 3        | 12         | 2.63E-29  |
| P31689     | DnaJ homolog subfamily A member 1                             | DNAJ2         | 0.82     | 0.85     | 0.70     | 1.43     | 0.79       | 0.08 | 14       | 46         | 1.39E-131 |
| P20700     | Lamin-B1                                                      | LMN1          | 0.82     | 0.86     | 0.69     | 1.45     | 0.79       | 0.09 | 39       | 61         | 0.00E+00  |
| Q9H0H5     | Male germ cell RacGap                                         | KIAA1478      | 0.77     | 0.89     | 0.71     | 1.41     | 0.79       | 0.09 | 6        | 14         | 5.08E-64  |
| P02786     | p90                                                           | TFRC          | 0.80     | 0.93     | 0.64     | 1.56     | 0.79       | 0.15 | 15       | 26         | 3.27E-201 |
| C9JYA1     | Putative uncharacterized protein NUPL2                        | NUPL2         | 0.68     |          | 0.90     | 1.11     | 0.79       | 0.16 | 2        | 5.5        | 2.42E-09  |
| O14920     | I-kappa-B kinase 2                                            | IKBKB         |          | 0.90     | 0.68     | 1.47     | 0.79       | 0.16 | 3        | 4.1        | 5.02E-08  |
| P15812-1   | R2G1                                                          | CD1E          | 0.69     | 0.99     | 0.69     | 1.45     | 0.79       | 0.17 | 3        | 12         | 1.09E-08  |
| Q9H384     | Nuclear localized protein 1                                   | FKSG26        | 0.98     |          | 0.60     | 1.67     | 0.79       | 0.27 | 3        | 8.6        | 1.44E-15  |
| Q13094     | Lymphocyte cytosolic protein 2                                | LCP2          | 0.61     | 0.63     | 1.13     | 0.88     | 0.79       | 0.29 | 8        | 17         | 3.79E-73  |
| P56524     | Histone deacetylase 4                                         | HDAC4         | 0.71     | 1.15     | 0.51     | 1.96     | 0.79       | 0.33 | 13       | 22         | 1.03E-72  |
| Q5W0V3-1   | Protein FAM160B1                                              | FAM160B1      | 0.52     | 0.57     | 1.28     | 0.78     | 0.79       | 0.43 | 4        | 7.1        | 3.24E-31  |
| O95155-1   | Homozygously deleted in neuroblastoma 1                       | HDNB1         |          |          | 0.79     | 1.27     | 0.79       |      | 2        | 2.5        | 9.29E-32  |
| O15381-1   | Nuclear valosin-containing protein-like                       | NVL           |          |          | 0.79     | 1.27     | 0.79       |      | 2        | 3.9        | 6.63E-12  |
| Q9UN36-1   | Protein NDRG2                                                 | KIAA1248      |          |          | 0.79     | 1.27     | 0.79       |      | 2        | 7.8        | 9.74E-05  |
| Q5VU11     | Ribonuclease P (30kD) (RPP30)                                 | RP11-320F15.1 |          |          | 0.79     | 1.27     | 0.79       |      | 2        | 11         | 2.10E-60  |
| Q13439-3   | 256 kDa golgin                                                | GOLGA4        |          |          | 0.79     | 1.27     | 0.79       |      | 2        | 0.7        | 1.86E-02  |
| Q13107-1   | Deubiquitinating enzyme 4                                     | UNP           |          |          | 0.79     | 1.27     | 0.79       |      | 3        | 5.9        | 1.03E-13  |
| P35610     | Acyl-coenzyme A:cholesterol acyltransferase 1                 | ACACT         |          |          | 0.79     | 1.27     | 0.79       |      | 3        | 6.9        | 1.63E-07  |
| O75449-1   | Katanin p60 ATPase-containing subunit A1                      | KATNA1        |          |          | 0.79     | 1.27     | 0.79       |      | 4        | 10         | 5.58E-25  |
| Q96KG9-1   | Coated vesicle-associated kinase of 90 kDa                    | CVAK90        |          |          | 0.79     | 1.27     | 0.79       |      | 4        | 9.9        | 2.44E-14  |
| Q8TBF4     | U11/U12 small nuclear ribonucleoprotein 31 kDa protein        | ZCRB1         |          |          | 0.79     | 1.27     | 0.79       |      | 5        | 36         | 4.57E-47  |
| B5M45      | Solute carrier family 4                                       | SLC4A         |          |          | 0.79     | 1.27     | 0.79       |      | 5        | 5.2        | 2.62E-44  |

| UniProt ID | Protein_Name                                                                                                        | Gene Name | F1 (L/H) | F2 (L/H) | R1 (H/L) | R1 (L/H) | Mean (T/U) | S.D. | Pep. No. | %Seq. Cov. | PEP       |
|------------|---------------------------------------------------------------------------------------------------------------------|-----------|----------|----------|----------|----------|------------|------|----------|------------|-----------|
| 1          | sodium bicarbonate cotransporter member 7                                                                           | 7         |          |          |          |          |            |      |          |            |           |
| Q8NHG8     | E3 ubiquitin-protein ligase ZNRF2                                                                                   | RNF202    |          |          | 0.79     | 1.27     | 0.79       |      | 6        | 55         | 5.47E-123 |
| Q8WUA2     | Cyclophilin-like protein PPIL4                                                                                      | PPIL4     |          |          | 0.79     | 1.27     | 0.79       |      | 6        | 19         | 6.76E-92  |
| Q96PE3-1   | Inositol polyphosphate 4-phosphatase type I                                                                         | INPP4A    |          |          | 0.79     | 1.27     | 0.79       |      | 6        | 8.8        | 4.67E-24  |
| Q9UGP4     | LIM domain-containing protein 1                                                                                     | LIMD1     | 0.79     |          |          |          | 0.79       |      | 2        | 3.8        | 2.25E-21  |
| Q8IZ21-2   | Phosphatase and actin regulator 4                                                                                   | PHACTR4   | 0.79     |          |          |          | 0.79       |      | 2        | 3.1        | 4.09E-03  |
| B4DRT5     | Serine/threonine-protein phosphatase                                                                                | CALNA3    | 0.79     |          |          |          | 0.79       |      | 2        | 4.2        | 6.46E-03  |
| Q96K17     | Basic transcription factor 3-like 4                                                                                 | BTF3L4    | 0.79     |          |          |          | 0.79       |      | 4        | 40         | 4.41E-28  |
| Q9NRG7-2   | Epimerase family protein SDR39U1                                                                                    | C14orf124 | 0.79     |          |          |          | 0.79       |      | 6        | 32         | 1.36E-46  |
| Q8N1K8     | cDNA FLJ40556 fis, clone THYMU2002583, highly similar to DYNAMIN 2                                                  | DYNAMIN 2 | 0.79     |          |          |          | 0.79       |      | 22       | 32         | 1.82E-190 |
| Q9Y6A5     | Transforming acidic coiled-coil-containing protein 3                                                                | ERIC1     | 0.84     | 0.80     | 0.74     | 1.35     | 0.79       | 0.05 | 12       | 22         | 1.11E-137 |
| P07919     | Complex III subunit 6                                                                                               | UQCRII    | 0.74     | 0.77     | 0.87     | 1.15     | 0.79       | 0.07 | 4        | 39         | 9.35E-137 |
| Q8WUI4-8   | Histone deacetylase 7                                                                                               | HDAC7     | 0.69     | 0.88     | 0.81     | 1.23     | 0.79       | 0.10 | 2        | 3          | 2.08E-03  |
| A8KAH5     | cDNA FLJ32696 fis, clone TESTI2000358                                                                               | IST1      | 0.76     | 0.70     | 0.92     | 1.09     | 0.79       | 0.11 | 3        | 8.4        | 1.82E-06  |
| O00161-1   | Synaptosomal-associated protein 23                                                                                  | SNAP23    | 0.64     | 0.76     | 0.98     | 1.02     | 0.79       | 0.17 | 7        | 45         | 1.46E-162 |
| Q9H4I3-1   | Protein TTG2                                                                                                        | PP2447    | 0.84     | 0.98     | 0.56     | 1.79     | 0.79       | 0.21 | 3        | 12         | 3.38E-28  |
| O15111     | Conserved helix-loop-helix ubiquitous kinase                                                                        | CHUK      | 0.82     | 0.77     |          |          | 0.80       | 0.04 | 3        | 4.4        | 7.83E-05  |
| A8K5U9     | cDNA FLJ75056, highly similar to Homo sapiens phosphatidylinositol binding clathrin assembly protein (PICALM), mRNA | PICALM    | 0.60     |          | 0.99     | 1.01     | 0.80       | 0.28 | 3        | 7.1        | 1.19E-92  |
| Q9Y6I3     | FH1/FH2 domain-containing protein 1                                                                                 | FHOD1     | 1.01     |          | 0.58     | 1.72     | 0.80       | 0.30 | 2        | 2.6        | 2.44E-24  |
| B0QZ40     | COMM domain containing 6                                                                                            | COMM6     | 0.79     | 0.80     |          |          | 0.80       | 0.01 | 2        | 20         | 1.09E-03  |
| Q86Y56-1   | HEAT repeat-containing protein 2                                                                                    | HEATR2    | 0.91     | 1.01     | 0.47     | 2.13     | 0.80       | 0.29 | 6        | 8.3        | 4.15E-25  |

| UniProt ID | Protein_Name                                   | Gene Name | F1 (L/H) | F2 (L/H) | R1 (H/L) | R1 (L/H) | Mean (T/U) | S.D. | Pep. No. | %Seq. Cov. | PEP       |
|------------|------------------------------------------------|-----------|----------|----------|----------|----------|------------|------|----------|------------|-----------|
| O14777     | Highly expressed in cancer protein             | HEC       | 0.77     | 0.81     | 0.81     | 1.23     | 0.80       | 0.02 | 6        | 9          | 1.61E-13  |
| Q16531     | Damage-specific DNA-binding protein 1          | DDB1      | 0.75     | 0.81     | 0.83     | 1.20     | 0.80       | 0.04 | 26       | 30         | 3.97E-156 |
| Q15003     | Barren homolog protein 1                       | BRRN      | 0.81     | 0.77     | 0.82     | 1.22     | 0.80       | 0.03 | 14       | 25         | 1.30E-93  |
| Q99661-1   | Kinesin-like protein 6                         | KIF2C     | 0.76     | 0.79     | 0.85     | 1.18     | 0.80       | 0.05 | 16       | 26         | 7.22E-188 |
| Q9P270     | SLAIN motif-containing protein 2               | KIAA1458  | 0.63     | 0.79     | 0.98     | 1.02     | 0.80       | 0.18 | 4        | 12         | 3.03E-55  |
| Q9Y296     | Hematopoietic stem/progenitor cell protein 172 | CGI-104   | 0.98     | 1.06     | 0.36     | 2.78     | 0.80       | 0.38 | 4        | 19         | 1.11E-21  |
| Q9BXY0     | NNP78                                          | MAK16     | 1.13     |          | 0.47     | 2.13     | 0.80       | 0.47 | 3        | 15         | 3.91E-23  |
| O43924     | Protein p17                                    | PDE6D     |          |          | 0.80     | 1.25     | 0.80       |      | 2        | 21         | 1.51E-11  |
| O75665     | Oral-facial-digital syndrome 1 protein         | CXorf5    |          |          | 0.80     | 1.25     | 0.80       |      | 2        | 1.3        | 3.31E-02  |
| B4DGS4     | cDNA FLJ56073, highly similar to Lipin-1       | KIAA0188  |          |          | 0.80     | 1.25     | 0.80       |      | 2        | 4.7        | 3.15E-04  |
| Q6PCB5-1   | Round spermatid basic protein 1-like protein   | RSBN1L    |          |          | 0.80     | 1.25     | 0.80       |      | 2        | 6.3        | 1.29E-24  |
| Q86US8-1   | EST1-like protein A                            | C17orf31  |          |          | 0.80     | 1.25     | 0.80       |      | 3        | 4          | 7.67E-27  |
| Q5VST6-1   | Abhydrolase domain-containing protein FAM108B1 | C9orf77   |          |          | 0.80     | 1.25     | 0.80       |      | 4        | 17         | 2.14E-14  |
| Q9H0B6     | Kinesin light chain 2                          | KLC2      |          |          | 0.80     | 1.25     | 0.80       |      | 16       | 29         | 1.14E-154 |
| Q8WXE1-1   | ATM and Rad3-related-interacting protein       | AGS1      |          | 0.80     |          |          | 0.80       |      | 2        | 2.7        | 1.45E-03  |
| Q6PJ69     | Tripartite motif-containing protein 65         | TRIM65    | 0.80     |          |          |          | 0.80       |      | 2        | 7.2        | 2.89E-04  |
| Q7Z7F1     | Inhibitor of kappaB kinase gamma               | IKBKG     |          | 0.80     |          |          | 0.80       |      | 2        | 4.7        | 4.93E-12  |
| Q02252     | Aldehyde dehydrogenase family 6 member A1      | ALDH6A1   |          | 0.80     |          |          | 0.80       |      | 3        | 7.3        | 8.48E-04  |
| P16402     | Histone H1.3                                   | H1F3      |          | 0.80     |          |          | 0.80       |      | 12       | 33         | 4.75E-136 |
| Q9UI08-2   | Ena/vasodilator-stimulated phosphoprotein-like | EVL       | 0.75     | 0.82     | 0.84     | 1.19     | 0.80       | 0.05 | 9        | 24         | 8.53E-113 |
| P11388-4   | DNA topoisomerase 2-alpha                      | TOP2      | 0.77     | 0.84     | 0.80     | 1.25     | 0.80       | 0.04 | 58       | 38         | 0.00E+00  |
| P57740     | 107 kDa nucleoporin                            | NUP107    | 0.84     | 0.76     | 0.81     | 1.23     | 0.80       | 0.04 | 14       | 20         | 1.65E-114 |
| A7E244     | TBC1 domain family, member 10A                 | TBC1D10A  | 0.76     | 0.76     | 0.89     | 1.12     | 0.80       | 0.08 | 3        | 10         | 8.30E-06  |
| O95239-1   | Chromokinesin-A                                | KIF4      | 0.75     | 0.76     | 0.90     | 1.11     | 0.80       | 0.08 | 11       | 10         | 5.30E-65  |

| UniProt ID | Protein_Name                                                  | Gene Name | F1 (L/H) | F2 (L/H) | R1 (H/L) | R1 (L/H) | Mean (T/U) | S.D. | Pep. No. | %Seq. Cov. | PEP       |
|------------|---------------------------------------------------------------|-----------|----------|----------|----------|----------|------------|------|----------|------------|-----------|
| Q92575     | Erasin                                                        | KIAA0242  | 0.83     | 0.67     | 0.91     | 1.10     | 0.80       | 0.12 | 4        | 8.7        | 1.39E-07  |
| B5MDZ2     | Putative uncharacterized protein THOC7                        | THOC7     | 0.77     | 0.65     | 0.99     | 1.01     | 0.80       | 0.17 | 7        | 29         | 4.17E-30  |
| Q96JY6-1   | PDZ and LIM domain protein 2                                  | PDLIM2    | 0.59     | 0.89     | 0.93     | 1.08     | 0.80       | 0.19 | 4        | 12         | 2.50E-13  |
| Q92896-2   | CFR-1                                                         | CFR1      | 0.53     | 0.63     | 1.25     | 0.80     | 0.80       | 0.39 | 24       | 25         | 3.73E-185 |
| P19404     | NADH dehydrogenase [ubiquinone] flavoprotein 2, mitochondrial | NDUFV2    | 0.78     |          | 0.83     | 1.20     | 0.81       | 0.04 | 4        | 28         | 6.39E-23  |
| Q7Z618-1   | UPF0461 protein C5orf24                                       | C5orf24   | 0.84     | 0.77     |          |          | 0.81       | 0.05 | 2        | 13         | 8.44E-39  |
| Q6P996-1   | Pyridoxal-dependent decarboxylase domain-containing protein 1 | KIAA0251  |          | 1.03     | 0.58     | 1.72     | 0.81       | 0.32 | 2        | 4.1        | 1.12E-04  |
| Q9Y5K8     | Vacuolar proton pump subunit D                                | ATP6M     | 0.80     | 0.86     | 0.76     | 1.32     | 0.81       | 0.05 | 7        | 26         | 3.31E-66  |
| P49006     | Macrophage myristoylated alanine-rich C kinase substrate      | MARCKSL1  | 0.76     | 0.91     | 0.75     | 1.33     | 0.81       | 0.09 | 2        | 14         | 7.98E-14  |
| P26358-1   | CXXC-type zinc finger protein 9                               | AIM       | 0.85     | 0.89     | 0.68     | 1.47     | 0.81       | 0.11 | 39       | 26         | 2.77E-198 |
| Q969M7-2   | NEDD8 carrier protein UBE2F                                   | NCE2      | 0.94     | 0.74     | 0.74     | 1.35     | 0.81       | 0.12 | 2        | 5.2        | 2.98E-05  |
| Q96K76-1   | Deubiquitinating enzyme 47                                    | USP47     | 0.96     | 0.75     | 0.71     | 1.41     | 0.81       | 0.13 | 7        | 6          | 4.53E-49  |
| P13612     | CD49 antigen-like family member D                             | CD49D     | 0.66     | 1.00     | 0.76     | 1.32     | 0.81       | 0.17 | 5        | 6.1        | 4.31E-14  |
| A4D218     | MAD1 mitotic arrest deficient-like 1 (Yeast)                  | MAD1L1    | 0.68     | 0.71     | 1.03     | 0.97     | 0.81       | 0.19 | 9        | 15         | 1.53E-19  |
| P49642     | DNA primase 49 kDa subunit                                    | PRIM1     | 0.96     | 1.07     | 0.39     | 2.56     | 0.81       | 0.37 | 3        | 9          | 8.52E-22  |
| P25098     | Beta-adrenergic receptor kinase 1                             | ADRBK1    | 0.74     | 0.75     | 0.94     | 1.06     | 0.81       | 0.11 | 8        | 10         | 2.18E-20  |
| A6NJ42     | Mitotic checkpoint protein BUB3                               | BUB3      | 0.73     | 0.97     | 0.73     | 1.37     | 0.81       | 0.14 | 17       | 56         | 1.26E-185 |
| Q8IUR7-6   | Armadillo repeat-containing protein 8                         | ARMC8     | 0.72     | 0.72     | 0.99     | 1.01     | 0.81       | 0.16 | 2        | 5.5        | 2.53E-02  |
| Q9BR61     | Acyl-CoA-binding domain-containing protein 6                  | ACBD6     | 0.73     | 1.00     | 0.70     | 1.43     | 0.81       | 0.17 | 2        | 9.2        | 3.92E-14  |
| Q9BYT8     | Angiotensin-binding protein                                   | AGTBP     | 0.81     | 0.81     |          |          | 0.81       | 0.00 | 2        | 3.3        | 5.01E-06  |
| P35612-1   | Beta-adducin                                                  | ADD2      |          | 0.82     | 0.80     | 1.25     | 0.81       | 0.01 | 3        | 4          | 8.56E-21  |
| Q9P0P0     | E3 ubiquitin-protein ligase RNF181                            | HSPC238   | 0.85     | 0.79     | 0.79     | 1.27     | 0.81       | 0.03 | 3        | 22         | 2.01E-04  |
| Q96AT      | Ribulose-5-phosphate-                                         | HUSSY     | 0.79     | 0.72     | 0.92     | 1.09     | 0.81       | 0.10 | 3        | 15         | 1.74E-113 |

| UniProt ID | Protein_Name                                                                                               | Gene Name | F1 (L/H) | F2 (L/H) | R1 (H/L) | R1 (L/H) | Mean (T/U) | S.D. | Pep. No. | %Seq. Cov. | PEP      |
|------------|------------------------------------------------------------------------------------------------------------|-----------|----------|----------|----------|----------|------------|------|----------|------------|----------|
| 9-1        | 3-epimerase                                                                                                | -17       |          |          |          |          |            |      |          |            |          |
| Q8WTW3     | Component of oligomeric Golgi complex 1                                                                    | COG1      | 0.93     | 0.75     | 0.75     | 1.33     | 0.81       | 0.10 | 4        | 7.7        | 1.74E-24 |
| P52948-5   | 96 kDa nucleoporin                                                                                         | ADAR2     | 0.70     | 0.81     | 0.92     | 1.09     | 0.81       | 0.11 | 15       | 9.9        | 1.83E-57 |
| O00170     | AH receptor-interacting protein                                                                            | AIP       | 0.71     | 1.11     | 0.61     | 1.64     | 0.81       | 0.26 | 25       | 60         | 0.00E+00 |
| Q9UGJ1     | Gamma-ring complex protein 76 kDa                                                                          | 76P       |          |          | 0.81     | 1.23     | 0.81       |      | 2        | 2.5        | 9.94E-03 |
| O43439-1   | ETO homologous on chromosome 20                                                                            | CBFA2 T2  |          |          | 0.81     | 1.23     | 0.81       |      | 2        | 5.8        | 1.26E-06 |
| Q96G28-2   | Coiled-coil domain-containing protein 104                                                                  | CCDC104   |          |          | 0.81     | 1.23     | 0.81       |      | 3        | 12         | 3.19E-11 |
| Q15155     | Nodal modulator 1                                                                                          | NOMO1     |          |          | 0.81     | 1.23     | 0.81       |      | 8        | 8.9        | 8.55E-57 |
| O95625     | Zinc finger and BTB domain-containing protein 11                                                           | ZBTB11    | 0.81     |          |          |          | 0.81       |      | 2        | 3.3        | 3.82E-52 |
| P20248     | Cyclin-A2                                                                                                  | CCN1      |          | 0.81     |          |          | 0.81       |      | 2        | 4.4        | 9.20E-03 |
| Q9NQE9     | Histidine triad nucleotide-binding protein 3                                                               | HINT3     |          | 0.81     |          |          | 0.81       |      | 2        | 11         | 2.72E-20 |
| A0MZ66-3   | Shootin-1                                                                                                  | KIAA1598  |          | 0.81     |          |          | 0.81       |      | 2        | 3.7        | 2.17E-06 |
| P46100-4   | ATP-dependent helicase ATRX                                                                                | ATRX      | 0.81     |          |          |          | 0.81       |      | 2        | 0.9        | 5.62E-03 |
| B7Z3B7     | ATPase, H <sup>+</sup> transporting, lysosomal V0 subunit a1, isoform CRA_a                                | ATP6V0A1  | 0.81     |          |          |          | 0.81       |      | 2        | 2.4        | 8.94E-03 |
| O75243     | U6 snRNA-associated Sm-like protein LSM7                                                                   | LSM7      | 0.81     |          |          |          | 0.81       |      | 2        | 23         | 1.11E-03 |
| Q9Y608-1   | Leucine-rich repeat flightless-interacting protein 2                                                       | LRRFIP2   |          | 0.81     |          |          | 0.81       |      | 3        | 4.7        | 3.67E-42 |
| P12532-2   | Acidic-type mitochondrial creatine kinase                                                                  | CKMT      |          | 0.81     |          |          | 0.81       |      | 3        | 5.1        | 1.43E-02 |
| C9JHT3     | HZGJ                                                                                                       | HZGJ      |          | 0.81     |          |          | 0.81       |      | 4        | 4.7        | 7.15E-08 |
| B3KUB7     | cDNA FLJ39535 fis, clone PUAEN2005502, highly similar to Goodpasture antigen-binding protein (EC 2.7.11.9) | COL4A3BP  |          | 0.81     |          |          | 0.81       |      | 4        | 5.1        | 1.16E-04 |
| O95758-4   | Regulator of differentiation 1                                                                             | ROD1      |          | 0.81     |          |          | 0.81       |      | 4        | 6.5        | 2.81E-13 |
| Q567Q0     | cDNA FLJ75025, highly similar to Homo sapiens peptidylprolyl                                               | PPIA      |          | 0.81     |          |          | 0.81       |      | 9        | 52         | 9.76E-71 |



| UniProt ID | Protein_Name                                                   | Gene Name | F1 (L/H) | F2 (L/H) | R1 (H/L) | R1 (L/H) | Mean (T/U) | S.D. | Pep. No. | %Seq. Cov. | PEP       |
|------------|----------------------------------------------------------------|-----------|----------|----------|----------|----------|------------|------|----------|------------|-----------|
|            | isomerase A (cyclophilin A) (PPIA), transcript variant 2, mRNA |           |          |          |          |          |            |      |          |            |           |
| Q13043-1   | Mammalian STE20-like protein kinase 1                          | MST1      | 0.76     | 0.81     | 0.87     | 1.15     | 0.81       | 0.06 | 3        | 8.8        | 2.37E-42  |
| Q9NWY4     | UPF0609 protein C4orf27                                        | C4orf27   | 0.90     | 0.82     | 0.72     | 1.39     | 0.81       | 0.09 | 9        | 33         | 1.07E-54  |
| Q14746     | Component of oligomeric Golgi complex 2                        | COG2      | 0.73     | 0.75     | 0.96     | 1.04     | 0.81       | 0.13 | 2        | 5.6        | 4.04E-05  |
| P06400     | p105-Rb                                                        | RB1       | 0.69     | 0.79     | 0.96     | 1.04     | 0.81       | 0.14 | 18       | 24         | 2.32E-138 |
| Q14761     | CD45-associated protein                                        | LPAP      | 0.67     | 0.76     | 1.01     | 0.99     | 0.81       | 0.18 | 5        | 25         | 1.34E-17  |
| O14745     | Ezrin-radixin-moesin-binding phosphoprotein 50                 | NHERF     | 0.66     | 0.68     | 1.10     | 0.91     | 0.81       | 0.25 | 11       | 36         | 1.46E-111 |
| Q8IYS1     | Aminoacylase-1-like protein 2                                  | ACY1L2    | 0.53     | 0.59     | 1.32     | 0.76     | 0.81       | 0.44 | 4        | 16         | 5.40E-16  |
| P55011-1   | Basolateral Na-K-Cl symporter                                  | NKCC1     | 0.96     |          | 0.67     | 1.49     | 0.82       | 0.21 | 5        | 8.6        | 1.05E-11  |
| Q14161-1   | ARF GTPase-activating protein GIT2                             | GIT2      | 0.84     | 0.77     | 0.84     | 1.19     | 0.82       | 0.04 | 5        | 9.9        | 1.41E-42  |
| Q9H0D6-1   | 5-3 exoribonuclease 2                                          | XRN2      | 0.81     | 0.80     | 0.84     | 1.19     | 0.82       | 0.02 | 19       | 22         | 1.35E-143 |
| C9JP52     | Putative uncharacterized protein TBC1D5                        | TBC1D5    | 0.78     | 0.86     | 0.81     | 1.23     | 0.82       | 0.04 | 4        | 7          | 8.25E-12  |
| O95721     | Soluble 29 kDa NSF attachment protein                          | SNAP29    | 0.83     | 0.88     | 0.74     | 1.35     | 0.82       | 0.07 | 7        | 35         | 5.02E-51  |
| Q8WUM0     | 133 kDa nucleoporin                                            | NUP133    | 0.77     | 0.93     | 0.75     | 1.33     | 0.82       | 0.10 | 10       | 15         | 1.47E-128 |
| Q8WUD1     | Ras-related protein Rab-2B                                     | RAB2B     | 0.93     | 0.99     | 0.53     | 1.89     | 0.82       | 0.25 | 9        | 53         | 5.63E-163 |
| B4DUT8     | cDNA FLJ52765, highly similar to Calponin-2                    | CNN2      | 0.49     | 0.52     | 1.44     | 0.69     | 0.82       | 0.54 | 11       | 44         | 1.13E-179 |
| Q13432-1   | Protein unc-119 homolog A                                      | RG4       |          | 0.82     | 0.82     | 1.22     | 0.82       | 0.00 | 3        | 18         | 2.02E-05  |
| A6NEV4     | Putative uncharacterized protein SYNRG                         | SYNRG     | 0.82     |          | 0.82     | 1.22     | 0.82       | 0.00 | 3        | 3.8        | 5.51E-06  |
| Q14181     | DNA polymerase alpha 70 kDa subunit                            | POLA2     | 0.80     | 0.81     | 0.85     | 1.18     | 0.82       | 0.03 | 2        | 6.4        | 3.23E-17  |
| P36873-2   | Protein phosphatase 1C catalytic subunit                       | PPP1C_C   | 0.78     | 0.89     | 0.79     | 1.27     | 0.82       | 0.06 | 17       | 60         | 0.00E+00  |
| O15511-1   | Actin-related protein 2/3 complex subunit 5                    | ARC16     | 0.75     | 0.72     | 0.99     | 1.01     | 0.82       | 0.15 | 3        | 40         | 1.67E-33  |
| Q86VS8     | Protein Hook homolog 3                                         | HOOK3     | 0.65     | 0.74     | 1.07     | 0.93     | 0.82       | 0.22 | 6        | 12         | 1.91E-76  |
| A8MVU0     | cDNA FLJ58628, highly similar to                               | LPXN      | 0.60     | 0.73     | 1.13     | 0.88     | 0.82       | 0.28 | 7        | 28         | 8.17E-79  |

| UniProt ID | Protein_Name                                                                                                          | Gene Name | F1 (L/H) | F2 (L/H) | R1 (H/L) | R1 (L/H) | Mean (T/U) | S.D. | Pep. No. | %Seq. Cov. | PEP       |
|------------|-----------------------------------------------------------------------------------------------------------------------|-----------|----------|----------|----------|----------|------------|------|----------|------------|-----------|
|            | Leupaxin                                                                                                              |           |          |          |          |          |            |      |          |            |           |
| A8K024     | cDNA FLJ78091, highly similar to Homo sapiens ubiquitin-like, containing PHD and RING finger domains, 1 (UHRF1), mRNA | UHRF1     | 0.64     | 0.65     | 1.17     | 0.85     | 0.82       | 0.30 | 12       | 17         | 6.07E-103 |
| Q8NCA5     | Protein FAM98A                                                                                                        | FAM98A    |          |          | 0.82     | 1.22     | 0.82       |      | 2        | 5.4        | 2.04E-08  |
| Q9HCM7     | AUTS2-like protein                                                                                                    | AUTS2L    |          |          | 0.82     | 1.22     | 0.82       |      | 2        | 1.6        | 3.02E-02  |
| C9J8D9     | 12KDa protein                                                                                                         | ZC3H15    |          |          | 0.82     | 1.22     | 0.82       |      | 2        | 23         | 7.82E-42  |
| A6NGQ6     | Putative uncharacterized protein C10orf32                                                                             | C10orf32  | 0.82     |          |          |          | 0.82       |      | 2        | 22         | 1.18E-05  |
| Q8NFD5-3   | AT-rich interactive domain-containing protein 1B                                                                      | ARID1B    | 0.82     |          |          |          | 0.82       |      | 2        | 2.2        | 1.45E-09  |
| Q9Y4F3-1   | Limkain-b1                                                                                                            | KIAA0430  | 0.82     |          |          |          | 0.82       |      | 2        | 0.9        | 1.26E-02  |
| O95630     | Associated molecule with the SH3 domain of STAM                                                                       | AMSH      |          | 0.82     |          |          | 0.82       |      | 3        | 5.4        | 1.42E-02  |
| P18065     | Insulin-like growth factor-binding protein 2                                                                          | BP2       |          | 0.82     |          |          | 0.82       |      | 3        | 10         | 6.19E-17  |
| Q8IVH4     | Methylmalonic aciduria type A protein, mitochondrial                                                                  | MMAA      | 0.81     | 0.83     |          |          | 0.82       | 0.01 | 2        | 5          | 6.13E-05  |
| P09693     | T-cell receptor T3 gamma chain                                                                                        | CD3G      | 0.79     |          | 0.85     | 1.18     | 0.82       | 0.04 | 4        | 24         | 9.87E-42  |
| P54278-1   | DNA mismatch repair protein PMS2                                                                                      | PMS2      |          | 0.85     | 0.79     | 1.27     | 0.82       | 0.04 | 6        | 11         | 1.19E-48  |
| O95619     | Glioma-amplified sequence 41                                                                                          | GAS41     |          | 0.75     | 0.89     | 1.12     | 0.82       | 0.10 | 2        | 11         | 7.35E-07  |
| Q8NBL1     | CAP10-like 46 kDa protein                                                                                             | C3orf9    |          | 0.75     | 0.89     | 1.12     | 0.82       | 0.10 | 3        | 8.4        | 9.02E-15  |
| Q14160-3   | Protein LAP4                                                                                                          | CRIB1     |          | 0.93     | 0.71     | 1.41     | 0.82       | 0.16 | 5        | 4          | 2.07E-18  |
| Q86UK7-1   | Zinc finger protein 598                                                                                               | ZNF598    | 0.78     | 0.93     | 0.76     | 1.32     | 0.82       | 0.09 | 9        | 12         | 4.65E-93  |
| P14635     | G2/mitotic-specific cyclin-B1                                                                                         | CCNB      | 0.86     | 0.90     | 0.71     | 1.41     | 0.82       | 0.10 | 6        | 16         | 3.32E-87  |
| Q8WX93-1   | Palladin                                                                                                              | CGI-151   | 0.73     | 1.01     | 0.73     | 1.37     | 0.82       | 0.16 | 3        | 3.8        | 6.56E-11  |
| Q9Y314     | eNOS-interacting protein                                                                                              | CGI-25    | 0.82     | 0.66     | 0.99     | 1.01     | 0.82       | 0.17 | 8        | 43         | 1.43E-43  |
| P40763-1   | Acute-phase response factor                                                                                           | APRF      | 0.71     | 0.72     | 1.04     | 0.96     | 0.82       | 0.19 | 3        | 6.8        | 1.30E-19  |
| P62851     | 40S ribosomal protein S25                                                                                             | RPS25     | 0.94     | 0.95     | 0.58     | 1.72     | 0.82       | 0.21 | 6        | 36         | 1.10E-31  |

| UniProt ID | Protein_Name                                                             | Gene Name | F1 (L/H) | F2 (L/H) | R1 (H/L) | R1 (L/H) | Mean (T/U) | S.D. | Pep. No. | %Seq. Cov. | PEP       |
|------------|--------------------------------------------------------------------------|-----------|----------|----------|----------|----------|------------|------|----------|------------|-----------|
| Q86YS6     | Ras-related protein Rab-41                                               | RAB41     | 0.78     | 0.79     | 0.90     | 1.11     | 0.82       | 0.07 | 4        | 30         | 9.09E-60  |
| B4DRA4     | cDNA FLJ58610                                                            | C12orf43  | 0.82     |          | 0.83     | 1.20     | 0.83       | 0.01 | 2        | 9.9        | 4.47E-15  |
| P40306     | Low molecular mass protein 10                                            | LMP10     | 0.83     |          | 0.82     | 1.22     | 0.83       | 0.01 | 3        | 15         | 1.15E-28  |
| Q96KP1     | Exocyst complex component 2                                              | EXOC2     | 0.86     |          | 0.79     | 1.27     | 0.83       | 0.05 | 3        | 4.9        | 6.34E-21  |
| B4E2C5     | Similar to Elongation factor 1-alpha 1                                   | EEF1A1    |          | 0.87     | 0.78     | 1.28     | 0.83       | 0.06 | 13       | 24         | 4.53E-42  |
| P68366     | Alpha-tubulin 1                                                          | TUBA1     | 0.77     | 0.88     |          |          | 0.83       | 0.08 | 23       | 54         | 0.00E+00  |
| O96005-2   | Cleft lip and palate transmembrane protein 1                             | CLPTM1    | 0.89     |          | 0.76     | 1.32     | 0.83       | 0.09 | 2        | 3.6        | 3.65E-06  |
| Q8WWW0-1   | New ras effector 1                                                       | NORE1     | 0.74     |          | 0.91     | 1.10     | 0.83       | 0.12 | 3        | 12         | 2.80E-07  |
| Q69YN2-1   | CWF19-like protein 1                                                     | CWF19L1   |          | 0.92     | 0.73     | 1.37     | 0.83       | 0.13 | 3        | 7.6        | 4.00E-17  |
| Q6PGP7     | Tetratricopeptide repeat protein 37                                      | KIAA0372  | 0.96     |          | 0.69     | 1.45     | 0.83       | 0.19 | 3        | 3.3        | 1.96E-26  |
| Q9NY61     | Apoptosis-antagonizing transcription factor                              | AATF      | 1.02     |          | 0.63     | 1.59     | 0.83       | 0.28 | 4        | 14         | 4.58E-38  |
| Q9Y375     | Complex I intermediate-associated protein 30, mitochondrial              | CGI-65    |          | 0.56     | 1.09     | 0.92     | 0.83       | 0.37 | 2        | 5.5        | 7.09E-04  |
| Q15019-2   | Neural precursor cell expressed developmentally down-regulated protein 5 | DIFF6     | 0.81     | 0.82     | 0.85     | 1.18     | 0.83       | 0.02 | 12       | 46         | 9.25E-243 |
| Q8NFC6     | Biorientation of chromosomes in cell division protein 1-like             | BOD1L     | 0.87     | 0.82     | 0.79     | 1.27     | 0.83       | 0.04 | 7        | 3.6        | 3.37E-23  |
| Q7L2H7     | Eukaryotic translation initiation factor 3 subunit M                     | EIF3M     | 0.91     | 0.78     | 0.79     | 1.27     | 0.83       | 0.07 | 11       | 39         | 8.44E-147 |
| Q86WB0-1   | Nuclear-interacting partner of ALK                                       | HSPC216   | 0.77     | 0.79     | 0.92     | 1.09     | 0.83       | 0.08 | 3        | 10         | 6.78E-18  |
| P09496-1   | Clathrin light chain A                                                   | CLTA      | 0.71     | 0.81     | 0.96     | 1.04     | 0.83       | 0.13 | 8        | 28         | 1.54E-77  |
| P20963-3   | T-cell receptor T3 zeta chain                                            | CD247     | 0.69     | 0.97     | 0.82     | 1.22     | 0.83       | 0.14 | 3        | 29         | 4.75E-12  |
| A8MTR8     | Kinesin-like protein 5                                                   | KIF23     | 0.94     | 0.87     | 0.67     | 1.49     | 0.83       | 0.14 | 5        | 7.4        | 3.70E-47  |
| Q9NWZ3     | Interleukin-1 receptor-associated kinase 4                               | IRAK4     | 0.80     | 0.70     | 0.98     | 1.02     | 0.83       | 0.14 | 2        | 5.9        | 3.73E-19  |
| Q14320     | Protein FAM50A                                                           | DXS9928E  | 0.71     | 0.77     | 1.00     | 1.00     | 0.83       | 0.15 | 4        | 17         | 2.75E-20  |
| Q3V6T2-1   | Akt phosphorylation enhancer                                             | CCDC88A   | 0.62     | 0.89     | 0.97     | 1.03     | 0.83       | 0.18 | 3        | 1.7        | 3.09E-21  |
| Q9NRL      | ATP-dependent                                                            | ACF1      | 1.17     | 0.86     | 0.45     | 2.22     | 0.83       | 0.36 | 6        | 5.9        | 1.28E-34  |

| UniProt ID | Protein_Name                                                          | Gene Name        | F1 (L/H) | F2 (L/H) | R1 (H/L) | R1 (L/H) | Mean (T/U) | S.D. | Pep. No. | %Seq. Cov. | PEP       |
|------------|-----------------------------------------------------------------------|------------------|----------|----------|----------|----------|------------|------|----------|------------|-----------|
| 2-1        | chromatin-remodeling protein                                          |                  |          |          |          |          |            |      |          |            |           |
| P49643-1   | DNA primase 58 kDa subunit                                            | PRIM2            | 0.97     |          | 0.69     | 1.45     | 0.83       | 0.20 | 5        | 13         | 7.79E-10  |
| Q9NWX8     | Gem-associated protein 8                                              | FAM51A1          | 1.14     |          | 0.52     | 1.92     | 0.83       | 0.44 | 2        | 8.7        | 1.46E-05  |
| Q49A26     | 3-hydroxyisobutyrate dehydrogenase-like protein                       | GLYR1            |          |          | 0.83     | 1.20     | 0.83       |      | 2        | 3.8        | 5.13E-03  |
| Q15526-1   | Surfeit locus protein 1                                               | SURF1            |          |          | 0.83     | 1.20     | 0.83       |      | 2        | 6          | 2.10E-04  |
| O43822     | C21orf2 protein                                                       | C21orf2          |          |          | 0.83     | 1.20     | 0.83       |      | 2        | 7.2        | 2.57E-08  |
| O60504-1   | SH3-containing adapter molecule 1                                     | SCAM1            |          |          | 0.83     | 1.20     | 0.83       |      | 5        | 12         | 2.05E-14  |
| A2BCW2     | MHC class I antigen C                                                 | HLA-C            |          |          | 0.83     | 1.20     | 0.83       |      | 7        | 23         | 3.35E-74  |
| Q9BZL4-1   | Protein phosphatase 1 myosin-binding subunit of 85 kDa                | LENG3            | 0.83     |          |          |          | 0.83       |      | 2        | 3.2        | 3.04E-05  |
| O75191     | Xylulose kinase                                                       | XYLB             | 0.83     |          |          |          | 0.83       |      | 2        | 6.7        | 8.48E-05  |
| Q9Y3A4     | Gastric cancer antigen Zg14                                           | CGI-96           | 0.83     |          |          |          | 0.83       |      | 2        | 13         | 6.77E-19  |
| Q6ZSZ5-1   | 114 kDa Rho-specific guanine nucleotide exchange factor               | ARHG EF18        |          | 0.83     |          |          | 0.83       |      | 2        | 1.9        | 1.76E-02  |
| Q86TI2-2   | Dipeptidyl peptidase 9                                                | DPP9             |          | 0.83     |          |          | 0.83       |      | 2        | 2.2        | 2.10E-03  |
| Q02224-1   | Centromere protein E                                                  | CENPE            | 0.83     |          |          |          | 0.83       |      | 3        | 1.6        | 2.30E-04  |
| Q9BZV1-1   | UBX domain-containing protein 1                                       | UBXD1            | 0.83     |          |          |          | 0.83       |      | 4        | 18         | 9.62E-91  |
| Q8N0Z6     | Tetratricopeptide repeat protein 5                                    | TTC5             | 0.83     |          |          |          | 0.83       |      | 8        | 26         | 4.14E-25  |
| B7ZC38     | SH3-domain GRB2-like endophilin B2                                    | RP11-167N5.3-011 | 0.83     |          |          |          | 0.83       |      | 11       | 40         | 4.38E-59  |
| A6NL76     | Putative uncharacterized protein ACTA1                                | ACTA1            | 0.83     |          |          |          | 0.83       |      | 27       | 46         | 0.00E+00  |
| O94855-2   | Protein transport protein Sec24D                                      | KIAA0755         | 0.80     |          | 0.86     | 1.16     | 0.83       | 0.04 | 3        | 4.2        | 1.15E-10  |
| B4DKQ0     | cDNA FLJ51236, highly similar to SH3 protein expressed in lymphocytes | CXorf9           | 0.79     |          | 0.87     | 1.15     | 0.83       | 0.06 | 3        | 13         | 1.40E-14  |
| Q68DF1     | Putative uncharacterized protein DKFZp779B0247                        | DKFZp779B0247    | 0.83     | 0.90     | 0.76     | 1.32     | 0.83       | 0.07 | 19       | 27         | 8.48E-120 |
| O75717     | Acidic nucleoplasmic DNA-binding protein 1                            | AND1             | 0.86     | 0.91     | 0.72     | 1.39     | 0.83       | 0.10 | 16       | 19         | 4.06E-209 |

| UniProt ID | Protein_Name                                                  | Gene Name | F1 (L/H) | F2 (L/H) | R1 (H/L) | R1 (L/H) | Mean (T/U) | S.D. | Pep. No. | %Seq. Cov. | PEP       |
|------------|---------------------------------------------------------------|-----------|----------|----------|----------|----------|------------|------|----------|------------|-----------|
| B2R7N7     | c-Jun N-terminal kinase kinase 1                              | JNKK1     | 0.76     |          | 0.90     | 1.11     | 0.83       | 0.10 | 6        | 19         | 1.10E-24  |
| Q12830-1   | Bromodomain and PHD finger-containing transcription factor    | BPTF      | 0.90     |          | 0.76     | 1.32     | 0.83       | 0.10 | 3        | 1.8        | 1.20E-22  |
| Q9Y5J1     | U3 small nucleolar RNA-associated protein 18 homolog          | CDABP0061 | 0.93     | 0.92     | 0.64     | 1.56     | 0.83       | 0.16 | 9        | 23         | 3.72E-41  |
| Q9Y4K1     | Absent in melanoma 1 protein                                  | AIM1      | 0.65     | 0.80     | 1.04     | 0.96     | 0.83       | 0.20 | 20       | 17         | 1.42E-164 |
| Q6Y7W6-1   | GRB10-interacting GYF protein 2                               | GIGYF2    | 0.75     | 0.84     | 0.91     | 1.10     | 0.83       | 0.08 | 20       | 21         | 2.56E-193 |
| P20674     | Cytochrome c oxidase polypeptide Va                           | COX5A     | 0.86     | 0.90     | 0.74     | 1.35     | 0.83       | 0.08 | 7        | 42         | 6.38E-32  |
| Q5H9R7-5   | SAPS domain family member 3                                   | C11orf23  | 0.77     | 0.76     | 0.97     | 1.03     | 0.83       | 0.12 | 4        | 7.3        | 1.22E-11  |
| Q7LBC6-1   | JmjC domain-containing histone demethylation protein 2B       | C5orf7    | 0.70     | 0.94     | 0.86     | 1.16     | 0.83       | 0.12 | 5        | 3.7        | 6.61E-36  |
| P04921-1   | Glycoconnectin                                                | GLPC      | 0.73     | 0.80     | 0.97     | 1.03     | 0.83       | 0.12 | 2        | 24         | 7.38E-30  |
| A6NN80     | Annexin A6, isoform CRA_c                                     | ANXA6     | 0.91     | 0.90     | 0.69     | 1.45     | 0.83       | 0.12 | 37       | 65         | 0.00E+00  |
| Q14677-1   | Clathrin interactor 1                                         | CLINT1    | 0.83     | 0.69     | 0.98     | 1.02     | 0.83       | 0.15 | 9        | 19         | 2.48E-116 |
| P40692     | DNA mismatch repair protein Mlh1                              | COCA2     | 0.81     | 0.99     | 0.70     | 1.43     | 0.83       | 0.15 | 8        | 11         | 5.46E-15  |
| Q6NYC1-3   | Bifunctional arginine demethylase and lysyl-hydroxylase JMJD6 | JMJD6     | 1.02     | 0.74     | 0.74     | 1.35     | 0.83       | 0.16 | 2        | 8.2        | 7.72E-52  |
| B4DYX9     | cDNA FLJ56180, highly similar to Negative elongation factor E | NELFE     | 0.97     | 0.88     | 0.65     | 1.54     | 0.83       | 0.17 | 5        | 15         | 2.32E-47  |
| O95251     | Histone acetyltransferase binding to ORC1                     | HBO1      | 0.65     | 0.82     | 1.03     | 0.97     | 0.83       | 0.19 | 4        | 8.8        | 2.95E-19  |
| P29966     | Myristoylated alanine-rich C-kinase substrate                 | MACS      | 0.84     | 0.83     |          |          | 0.84       | 0.01 | 2        | 7.8        | 6.28E-06  |
| P08574     | Complex III subunit 4                                         | CYC1      | 0.89     |          | 0.78     | 1.28     | 0.84       | 0.08 | 6        | 25         | 7.44E-100 |
| C9J6Z3     | cDNA FLJ77867                                                 | RBM21     | 0.96     |          | 0.71     | 1.41     | 0.84       | 0.18 | 6        | 13         | 7.45E-71  |
| Q8IY17-1   | Neuropathy target esterase                                    | NTE       | 1.14     |          | 0.53     | 1.89     | 0.84       | 0.43 | 5        | 7.2        | 8.06E-15  |
| O15400-1   | Syntaxin-7                                                    | STX7      | 0.84     | 0.85     | 0.82     | 1.22     | 0.84       | 0.02 | 3        | 15         | 1.14E-43  |
| Q9UID3-1   | Another new gene 2 protein                                    | ANG2      | 0.93     | 0.86     | 0.72     | 1.39     | 0.84       | 0.11 | 5        | 9.3        | 8.75E-53  |
| Q6VY07-2   | Phosphofurin acidic cluster sorting protein 1                 | KIAA1175  | 0.73     | 0.81     | 0.97     | 1.03     | 0.84       | 0.12 | 2        | 2.9        | 3.93E-38  |
| P61106     | Ras-related protein Rab-14                                    | RAB14     | 0.90     | 0.69     | 0.92     | 1.09     | 0.84       | 0.13 | 13       | 69         | 9.60E-222 |

| UniProt ID | Protein_Name                                                                                           | Gene Name | F1 (L/H) | F2 (L/H) | R1 (H/L) | R1 (L/H) | Mean (T/U) | S.D. | Pep. No. | %Seq. Cov. | PEP       |
|------------|--------------------------------------------------------------------------------------------------------|-----------|----------|----------|----------|----------|------------|------|----------|------------|-----------|
| Q96ST2-1   | IWS1-like protein                                                                                      | IWS1      | 0.73     | 0.78     | 1.00     | 1.00     | 0.84       | 0.14 | 6        | 8.3        | 1.44E-114 |
| B2RTR1     | CLASP2 protein                                                                                         | CLASP2    | 0.7      | 0.82     | 0.99     | 1.01     | 0.84       | 0.15 | 15       | 13         | 1.42E-186 |
| B3KRV2     | cDNA FLJ34950 fis, clone NT2RP7017284, highly similar to Casein kinase I isoform epsilon (EC 2.7.11.1) | CSNK1E    | 0.80     | 0.70     | 1.01     | 0.99     | 0.84       | 0.16 | 3        | 10         | 1.49E-13  |
| P01850     | T-cell receptor beta-1 chain C region                                                                  | TRBC1     | 0.87     | 1.03     | 0.61     | 1.64     | 0.84       | 0.21 | 3        | 18         | 5.05E-31  |
| Q9NP72     | Ras-related protein Rab-18                                                                             | RAB18     | 0.86     | 0.78     | 0.87     | 1.15     | 0.84       | 0.05 | 8        | 48         | 3.61E-189 |
| A8MSH7     | Putative uncharacterized protein CUL4A                                                                 | CUL4A     | 0.80     | 0.79     | 0.92     | 1.09     | 0.84       | 0.07 | 18       | 24         | 1.11E-116 |
| Q99700-1   | Ataxin-2                                                                                               | ATX2      | 0.74     | 0.92     | 0.85     | 1.18     | 0.84       | 0.09 | 7        | 11         | 2.64E-31  |
| Q92995     | Deubiquitinating enzyme 13                                                                             | ISOT3     | 0.87     | 0.98     | 0.66     | 1.52     | 0.84       | 0.16 | 3        | 7.2        | 5.71E-09  |
| P55212-1   | Apoptotic protease Mch-2                                                                               | CASP6     | 0.63     | 0.75     | 1.14     | 0.88     | 0.84       | 0.27 | 4        | 15         | 8.14E-21  |
| P63220     | 40S ribosomal protein S21                                                                              | RPS21     | 0.86     | 0.86     | 0.80     | 1.25     | 0.84       | 0.03 | 6        | 59         | 4.84E-90  |
| Q13177     | C-t-PAK2                                                                                               | PAK2      | 0.85     | 0.80     | 0.87     | 1.15     | 0.84       | 0.04 | 16       | 48         | 6.67E-117 |
| O43264     | Centromere/kinetochore protein zw10 homolog                                                            | ZW10      | 0.83     | 0.80     | 0.89     | 1.12     | 0.84       | 0.05 | 5        | 9.6        | 2.09E-157 |
| Q9NZ43-1   | Putative MAPK-activating protein PM26                                                                  | MDS032    | 0.76     | 0.82     | 0.94     | 1.06     | 0.84       | 0.09 | 4        | 16         | 1.40E-12  |
| B4DZF2     | cDNA FLJ59571, highly similar to Eukaryotic translation initiation factor 4gamma 2                     | DAP5      | 0.85     | 0.93     | 0.74     | 1.35     | 0.84       | 0.10 | 29       | 32         | 1.13E-241 |
| Q01813     | 6-phosphofructokinase, liver type                                                                      | PFKL      | 0.92     | 0.87     | 0.73     | 1.37     | 0.84       | 0.10 | 4        | 8.3        | 5.10E-41  |
| Q9H8Y8-2   | Golgi phosphoprotein 6                                                                                 | GOLPH6    | 0.84     | 0.74     | 0.94     | 1.06     | 0.84       | 0.10 | 5        | 16         | 6.06E-44  |
| Q7Z5L9-1   | Interferon regulatory factor 2-binding protein 2                                                       | IRF2BP2   | 0.76     | 0.79     | 0.97     | 1.03     | 0.84       | 0.11 | 11       | 29         | 6.25E-127 |
| Q96F15-2   | GTPase IMAP family member 5                                                                            | GIMAP5    | 0.76     | 0.77     | 0.99     | 1.01     | 0.84       | 0.13 | 4        | 16         | 3.05E-76  |
| Q7Z6I6-1   | Rho GTPase-activating protein 30                                                                       | ARHGAP30  | 0.64     | 0.80     | 1.08     | 0.93     | 0.84       | 0.22 | 6        | 9.2        | 1.01E-68  |
| P40855-1   | 33 kDa housekeeping protein                                                                            | HK33      | 0.94     | 1.10     | 0.48     | 2.08     | 0.84       | 0.32 | 2        | 10         | 2.46E-12  |
| O75791     | Adapter protein GRID                                                                                   | GADS      | 0.48     | 0.47     | 1.57     | 0.64     | 0.84       | 0.63 | 15       | 43         | 3.56E-66  |
| Q8NEJ9     | EIF4E-binding protein                                                                                  | C14orf1   |          |          | 0.84     | 1.19     | 0.84       |      | 2        | 7.6        | 1.03E-41  |

| UniProt ID | Protein_Name                                                                                                    | Gene Name | F1 (L/H) | F2 (L/H) | R1 (H/L) | R1 (L/H) | Mean (T/U) | S.D. | Pep. No. | %Seq. Cov. | PEP       |
|------------|-----------------------------------------------------------------------------------------------------------------|-----------|----------|----------|----------|----------|------------|------|----------|------------|-----------|
| -1         |                                                                                                                 | 20        |          |          |          |          |            |      |          |            |           |
| Q96T58     | Msx2-interacting protein                                                                                        | KIAA0929  |          |          | 0.84     | 1.19     | 0.84       |      | 2        | 0.7        | 2.69E-05  |
| P54707-2   | Non-gastric H(+)/K(+) ATPase subunit alpha                                                                      | ATP12A    |          |          | 0.84     | 1.19     | 0.84       |      | 3        | 2.8        | 2.00E-03  |
| Q9Y2X9     | GC-box-binding zinc finger protein 1                                                                            | GZP1      |          |          | 0.84     | 1.19     | 0.84       |      | 3        | 6.1        | 2.03E-19  |
| Q9UBU8     | Mortality factor 4 like 1                                                                                       | MORF4L1   |          |          | 0.84     | 1.19     | 0.84       |      | 6        | 21         | 1.07E-33  |
| P36954     | DNA-directed RNA polymerase II subunit I                                                                        | POLR2I    |          | 0.84     |          |          | 0.84       |      | 2        | 19         | 9.73E-58  |
| Q9UJK0     | UPF0293 protein C16orf42                                                                                        | C16orf42  |          | 0.84     |          |          | 0.84       |      | 2        | 8.3        | 3.26E-66  |
| Q9H082     | Ras-related protein Rab-33B                                                                                     | RAB33B    |          | 0.84     |          |          | 0.84       |      | 2        | 9.6        | 4.52E-04  |
| Q96HR3     | Mediator complex subunit 30                                                                                     | MED30     | 0.84     |          |          |          | 0.84       |      | 2        | 12         | 6.25E-05  |
| P14621     | Acylphosphatase, muscle type isozyme                                                                            | ACYP      |          | 0.84     |          |          | 0.84       |      | 2        | 17         | 4.21E-09  |
| Q9H0E3-2   | 130 kDa Sin3-associated polypeptide                                                                             | SAP130    |          | 0.84     |          |          | 0.84       |      | 3        | 4          | 2.50E-06  |
| Q12792-2   | Protein A6                                                                                                      | PTK9      | 0.84     |          |          |          | 0.84       |      | 3        | 5.5        | 6.01E-06  |
| B4DH95     | cDNA FLJ50958, highly similar to Homo sapiens GTPase, IMAP family member 6 (GIMAP6), transcript variant 1, mRNA | FLJ00102  |          | 0.84     |          |          | 0.84       |      | 3        | 8.6        | 1.08E-08  |
| B4DYV5     | cDNA FLJ53484, highly similar to Homo sapiens ubiquitin protein ligase E3 component n-recognin 4 (UBR4), mRNA   | UBR4      |          | 0.84     |          |          | 0.84       |      | 3        | 3.5        | 8.75E-07  |
| Q09472     | E1A-associated protein p300                                                                                     | EP300     | 0.84     |          |          |          | 0.84       |      | 4        | 1.7        | 3.36E-05  |
| Q9UIQ6-1   | Insulin-regulated membrane aminopeptidase                                                                       | LNPEP     | 0.84     |          |          |          | 0.84       |      | 4        | 4          | 1.70E-36  |
| O14618     | Copper chaperone for superoxide dismutase                                                                       | CCS       | 0.84     |          |          |          | 0.84       |      | 5        | 23         | 1.21E-26  |
| P83916     | Chromobox protein homolog 1                                                                                     | CBX       |          | 0.84     |          |          | 0.84       |      | 6        | 24         | 3.38E-64  |
| P30464     | HLA class I histocompatibility antigen, B-15 alpha chain                                                        | HLAB15    | 0.84     |          |          |          | 0.84       |      | 6        | 23         | 5.06E-122 |
| Q9NRW1     | Ras-related protein Rab-6B                                                                                      | RAB6B     | 0.78     | 0.90     |          |          | 0.84       | 0.08 | 7        | 37         | 2.47E-77  |

| UniProt ID | Protein_Name                                                                   | Gene Name | F1 (L/H) | F2 (L/H) | R1 (H/L) | R1 (L/H) | Mean (T/U) | S.D. | Pep. No. | %Seq. Cov. | PEP       |
|------------|--------------------------------------------------------------------------------|-----------|----------|----------|----------|----------|------------|------|----------|------------|-----------|
| B4DN27     | cDNA FLJ57057, highly similar to Small subunit processome component 20 homolog | DRIM      | 1.08     |          | 0.60     | 1.67     | 0.84       | 0.34 | 8        | 4.2        | 3.86E-21  |
| Q96S55-1   | ATPase WRNIP1                                                                  | WHIP      |          | 1.31     | 0.37     | 2.70     | 0.84       | 0.66 | 6        | 8.9        | 7.26E-15  |
| Q9GZT3     | SRA stem-loop-interacting RNA-binding protein, mitochondrial                   | C14orf156 | 0.80     | 0.91     | 0.82     | 1.22     | 0.84       | 0.06 | 6        | 54         | 2.50E-57  |
| Q9NXF7     | DDB1- and CUL4-associated factor 16                                            | C4orf30   | 0.95     | 0.79     | 0.79     | 1.27     | 0.84       | 0.09 | 3        | 27         | 2.57E-06  |
| Q9HC07     | Transmembrane protein 165                                                      | TMEM165   | 0.98     | 0.77     | 0.78     | 1.28     | 0.84       | 0.12 | 2        | 11         | 7.70E-08  |
| Q6FIF0-1   | AN1-type zinc finger protein 6                                                 | AWP1      | 0.72     | 0.72     | 1.09     | 0.92     | 0.84       | 0.21 | 3        | 24         | 8.52E-07  |
| Q9BSJ8-2   | Extended synaptotagmin-1                                                       | ESYT1     | 0.75     | 0.69     | 1.09     | 0.92     | 0.84       | 0.22 | 25       | 33         | 0.00E+00  |
| B4DX20     | cDNA FLJ60932, highly similar to T-complex protein 1 subunit zeta-2            | CCT6B     | 0.86     |          | 0.83     | 1.20     | 0.85       | 0.02 | 6        | 12         | 5.34E-24  |
| Q8NC56     | LEM domain-containing protein 2                                                | LEMD2     | 0.83     | 0.86     |          |          | 0.85       | 0.02 | 3        | 8.5        | 1.21E-06  |
| Q9NSI2-1   | Uncharacterized protein C21orf70                                               | C21orf70  | 0.90     |          | 0.79     | 1.27     | 0.85       | 0.08 | 4        | 20         | 1.01E-39  |
| B4DJL6     | cDNA FLJ55475                                                                  | C15orf44  | 0.77     |          | 0.92     | 1.09     | 0.85       | 0.11 | 2        | 3.8        | 6.55E-04  |
| Q13153-2   | Alpha-PAK                                                                      | PAK1      |          | 0.68     | 1.01     | 0.99     | 0.85       | 0.23 | 4        | 9.6        | 9.67E-67  |
| Q96PZ0     | Pseudouridylate synthase 7 homolog                                             | KIAA1897  | 1.13     |          | 0.56     | 1.79     | 0.85       | 0.40 | 4        | 13         | 9.82E-15  |
| P30519     | Heme oxygenase 2                                                               | HMOX2     | 0.83     | 0.80     | 0.91     | 1.10     | 0.85       | 0.06 | 8        | 34         | 2.15E-102 |
| Q4V328-1   | GRIP1-associated protein 1                                                     | GRIP1     | 0.79     | 0.93     | 0.82     | 1.22     | 0.85       | 0.07 | 9        | 15         | 1.55E-55  |
| B5MBX9     | Putative uncharacterized protein ZC3H14                                        | ZC3H14    | 0.92     | 0.90     | 0.72     | 1.39     | 0.85       | 0.11 | 10       | 19         | 7.11E-87  |
| O75976     | Carboxypeptidase D                                                             | CPD       | 0.98     | 0.87     | 0.69     | 1.45     | 0.85       | 0.15 | 4        | 3.6        | 1.24E-82  |
| P53384-1   | Cytosolic Fe-S cluster assembly factor NUBP1                                   | NBP       | 0.69     | 0.71     | 1.14     | 0.88     | 0.85       | 0.25 | 2        | 6.2        | 1.77E-10  |
| P35611-3   | Alpha-adducin                                                                  | ADD1      | 0.63     | 0.62     | 1.29     | 0.78     | 0.85       | 0.38 | 15       | 28         | 4.51E-131 |
| Q9BZD4     | Cell division cycle-associated protein 1                                       | CDCA1     | 0.89     | 0.80     | 0.86     | 1.16     | 0.85       | 0.05 | 2        | 4.5        | 4.13E-23  |
| Q9NP81     | Serine--tRNA ligase                                                            | SARS2     | 0.82     | 0.92     | 0.81     | 1.23     | 0.85       | 0.06 | 7        | 18         | 1.36E-91  |
| Q9NV M6    | DnaJ homolog subfamily C member 17                                             | DNAJC17   | 0.89     | 0.88     | 0.78     | 1.28     | 0.85       | 0.06 | 5        | 18         | 8.96E-41  |



| UniProt ID | Protein_Name                                                                       | Gene Name    | F1 (L/H) | F2 (L/H) | R1 (H/L) | R1 (L/H) | Mean (T/U) | S.D. | Pep. No. | %Seq. Cov. | PEP       |
|------------|------------------------------------------------------------------------------------|--------------|----------|----------|----------|----------|------------|------|----------|------------|-----------|
| O76003     | Glutaredoxin-3                                                                     | GLRX3        | 0.80     | 0.80     | 0.95     | 1.05     | 0.85       | 0.09 | 13       | 40         | 1.02E-68  |
| Q07866-4   | Kinesin light chain 1                                                              | KLC          | 0.77     | 0.82     | 0.96     | 1.04     | 0.85       | 0.10 | 24       | 39         | 8.53E-185 |
| Q27J81-1   | HBEBP2-binding protein C                                                           | C14orf151    | 0.84     | 0.96     | 0.75     | 1.33     | 0.85       | 0.11 | 8        | 11         | 1.06E-96  |
| Q7Z4H3-1   | HD domain-containing protein 2                                                     | C6orf74      | 0.80     | 0.75     | 1.00     | 1.00     | 0.85       | 0.13 | 6        | 38         | 1.39E-28  |
| O95071     | E3 ubiquitin-protein ligase UBR5                                                   | EDD          | 0.89     | 0.96     | 0.70     | 1.43     | 0.85       | 0.13 | 8        | 5          | 8.47E-33  |
| Q6PID6     | Osmosis-responsive factor                                                          | TTC33        | 1.01     | 0.76     | 0.78     | 1.28     | 0.85       | 0.14 | 5        | 31         | 2.79E-28  |
| P62070     | Ras-like protein TC21                                                              | RRAS2        | 0.75     | 0.95     |          |          | 0.85       | 0.14 | 5        | 29         | 1.51E-25  |
| Q9Y3B7     | 39S ribosomal protein L11, mitochondrial                                           | CGI-113      | 0.96     | 0.74     |          |          | 0.85       | 0.16 | 5        | 37         | 1.32E-52  |
| Q9UK61-1   | CTCL tumor antigen se89-1                                                          | C3orf63      | 0.74     | 0.96     |          |          | 0.85       | 0.16 | 5        | 3.2        | 6.61E-07  |
| Q13610     | Keratinocyte protein IEF SSP 9502                                                  | PWP1         | 0.76     | 0.76     | 1.03     | 0.97     | 0.85       | 0.16 | 5        | 14         | 5.03E-10  |
| P31153     | Methionine adenosyltransferase 2                                                   | AMS2         | 0.94     | 0.95     | 0.66     | 1.52     | 0.85       | 0.16 | 10       | 24         | 7.17E-91  |
| Q8WUX9     | Charged multivesicular body protein 7                                              | CHMP7        | 0.74     | 0.76     | 1.05     | 0.95     | 0.85       | 0.17 | 4        | 12         | 2.90E-42  |
| P08754     | G(i) alpha-3                                                                       | GNAI3        | 0.98     |          | 0.72     | 1.39     | 0.85       | 0.18 | 11       | 44         | 5.71E-62  |
| Q9Y2P8     | RNA 3-terminal phosphate cyclase-like protein                                      | HSPC338      | 0.85     | 1.05     | 0.65     | 1.54     | 0.85       | 0.20 | 3        | 8.3        | 4.10E-31  |
| Q16222-1   | AGX-1                                                                              | SPAG2        | 0.65     | 0.84     | 1.06     | 0.94     | 0.85       | 0.21 | 8        | 21         | 6.97E-58  |
| Q92974-2   | Guanine nucleotide exchange factor H1                                              | ARHG EF2     | 0.63     | 0.62     | 1.30     | 0.77     | 0.85       | 0.39 | 30       | 31         | 2.76E-272 |
| B4DTS2     | cDNA FLJ60070, highly similar to Serine/threonine-protein kinase D2 (EC 2.7.11.13) | HSPC187      |          |          | 0.85     | 1.18     | 0.85       |      | 2        | 3.5        | 5.18E-08  |
| O95159     | Zinc finger protein MCG4                                                           | ZFPL1        |          |          | 0.85     | 1.18     | 0.85       |      | 2        | 5.5        | 1.94E-02  |
| Q9UFV9     | Putative uncharacterized protein DKFZp434J046                                      | DKFZp434J046 |          |          | 0.85     | 1.18     | 0.85       |      | 2        | 2.6        | 2.09E-09  |
| Q86VV8     | Rotatin                                                                            | RTTN         |          |          | 0.85     | 1.18     | 0.85       |      | 3        | 1.7        | 8.90E-05  |
| Q16773-1   | Cysteine-S-conjugate beta-lyase                                                    | CCBL1        | 0.85     |          |          |          | 0.85       |      | 2        | 7.8        | 6.77E-04  |
| Q9H9P8-1   | L-2-hydroxyglutarate dehydrogenase, mitochondrial                                  | C14orf160    |          | 0.85     |          |          | 0.85       |      | 2        | 4.3        | 1.37E-03  |
| Q4KWH8-1   | 1-phosphatidylinositol-4,5-bisphosphate                                            | KIAA1069     | 0.85     |          |          |          | 0.85       |      | 2        | 0.8        | 1.67E-02  |

| UniProt ID | Protein_Name                                                                 | Gene Name             | F1 (L/H) | F2 (L/H) | R1 (H/L) | R1 (L/H) | Mean (T/U) | S.D. | Pep. No. | %Seq. Cov. | PEP      |
|------------|------------------------------------------------------------------------------|-----------------------|----------|----------|----------|----------|------------|------|----------|------------|----------|
|            | phosphodiesterase eta-1                                                      |                       |          |          |          |          |            |      |          |            |          |
| P61018-2   | Ras-related protein Rab-4B                                                   | PP1596                | 0.85     |          |          |          | 0.85       |      | 2        | 16         | 1.65E-52 |
| Q14527-1   | DNA-binding protein/plasminogen activator inhibitor 1 regulator              | HIP116 A              | 0.85     |          |          |          | 0.85       |      | 2        | 3.6        | 1.39E-12 |
| P61129     | Zinc finger CCCH domain-containing protein 6                                 | KIAA2035              | 0.85     |          |          |          | 0.85       |      | 2        | 3.8        | 5.06E-05 |
| Q5Y190     | Anchor protein                                                               | RESDA1                | 0.85     |          |          |          | 0.85       |      | 2        | 0.5        | 1.13E-03 |
| Q96EY5-1   | CIN85/CD2AP family-binding protein                                           | CFBP                  | 0.85     |          |          |          | 0.85       |      | 2        | 13         | 1.18E-30 |
| P10746     | Hydroxymethylbilane hydrolyase [cyclizing]                                   | UROS                  | 0.85     |          |          |          | 0.85       |      | 2        | 13         | 3.98E-09 |
| Q14257     | Calcium-binding protein ERC-55                                               | ERC55                 | 0.85     |          |          |          | 0.85       |      | 2        | 11         | 4.48E-42 |
| Q5UCC4-3   | Hematopoietic signal peptide-containing membrane domain-containing protein 1 | C19orf63              | 0.85     |          |          |          | 0.85       |      | 2        | 8.9        | 1.44E-77 |
| Q99828     | Calcium- and integrin-binding protein                                        | CIB                   | 0.85     |          |          |          | 0.85       |      | 3        | 20         | 4.03E-21 |
| Q9BVL4     | Selenoprotein O                                                              | SELO                  | 0.85     |          |          |          | 0.85       |      | 3        | 8.7        | 3.67E-41 |
| Q9Y3L3-1   | SH3 domain-binding protein 1                                                 | SH3BP1                |          | 0.85     |          |          | 0.85       |      | 3        | 3.9        | 1.69E-03 |
| Q6YP21-1   | Cysteine-S-conjugate beta-lyase 2                                            | CCBL2                 |          | 0.85     |          |          | 0.85       |      | 3        | 8.6        | 9.94E-24 |
| Q96Q89-2   | Cancer/testis antigen 90                                                     | KIF20B                |          | 0.85     |          |          | 0.85       |      | 3        | 1.8        | 3.25E-02 |
| O00459     | Phosphatidylinositol 3-kinase 85 kDa regulatory subunit beta                 | PIK3R2                | 0.85     |          |          |          | 0.85       |      | 4        | 8.2        | 1.44E-11 |
| Q9UNP9-1   | Cyclophilin E                                                                | CYP33                 | 0.85     |          |          |          | 0.85       |      | 9        | 34         | 2.23E-51 |
| Q96B97-1   | Cbl-interacting protein of 85 kDa                                            | CIN85                 | 0.85     |          |          |          | 0.85       |      | 11       | 27         | 5.01E-57 |
| Q4LE64     | NUMA1 variant protein                                                        | NUMA1 variant protein | 0.85     |          |          |          | 0.85       |      | 83       | 46         | 0.00E+00 |
| O60828-1   | 38 kDa nuclear protein containing a WW domain                                | JM26                  | 1.06     | 0.83     | 0.66     | 1.52     | 0.85       | 0.20 | 4        | 36         | 3.07E-28 |
| Q9BZF1-1   | Oxysterol-binding protein-related protein 8                                  | KIAA1451              | 0.72     | 0.89     | 0.95     | 1.05     | 0.85       | 0.12 | 9        | 16         | 2.60E-62 |
| Q8ND56-2   | Protein FAM61A                                                               | C19orf13              | 0.64     | 0.78     | 1.14     | 0.88     | 0.85       | 0.26 | 3        | 7.8        | 1.55E-08 |
| O00571     | ATP-dependent RNA                                                            | DBX                   | 0.85     | 0.83     | 0.88     | 1.14     | 0.85       | 0.03 | 27       | 44         | 0.00E+00 |

| UniProt ID | Protein_Name                                                                     | Gene Name     | F1 (L/H) | F2 (L/H) | R1 (H/L) | R1 (L/H) | Mean (T/U) | S.D. | Pep. No. | %Seq. Cov. | PEP      |
|------------|----------------------------------------------------------------------------------|---------------|----------|----------|----------|----------|------------|------|----------|------------|----------|
|            | helicase DDX3X                                                                   |               |          |          |          |          |            |      |          |            |          |
| B4DXJ1     | cDNA FLJ56334, highly similar to SEC13-related protein                           | D3S1231E      | 0.91     | 0.87     | 0.78     | 1.28     | 0.85       | 0.07 | 6        | 23         | 1.98E-55 |
| Q9Y4C8     | Probable RNA-binding protein 19                                                  | KIAA0682      | 0.80     | 0.94     | 0.82     | 1.22     | 0.85       | 0.08 | 6        | 7.6        | 1.19E-85 |
| Q9NP11-2   | 75 kDa bromodomain protein                                                       | BP75          | 0.73     | 0.91     | 0.92     | 1.09     | 0.85       | 0.11 | 4        | 9.4        | 1.22E-73 |
| Q8TB72-1   | Pumilio homolog 2                                                                | KIAA0235      | 0.72     | 0.92     | 0.92     | 1.09     | 0.85       | 0.12 | 6        | 6.3        | 1.23E-32 |
| P19387     | DNA-directed RNA polymerase II 33 kDa polypeptide                                | A-152E5.7     | 1.07     | 0.78     | 0.71     | 1.41     | 0.85       | 0.19 | 8        | 42         | 6.07E-79 |
| Q2I5I4     | Four and a half LIM-domain protein 2                                             | FHL2          | 0.56     | 0.70     | 1.30     | 0.77     | 0.85       | 0.39 | 5        | 15         | 9.62E-21 |
| Q6IQ49-1   | UPF0667 protein C1orf55                                                          | C1orf55       |          | 0.86     | 0.85     | 1.18     | 0.86       | 0.01 | 3        | 6.7        | 5.65E-13 |
| P40818     | Deubiquitinating enzyme 8                                                        | KIAA0055      |          | 0.86     | 0.85     | 1.18     | 0.86       | 0.01 | 7        | 9.2        | 1.74E-39 |
| O95671-1   | N-acetylserotonin O-methyltransferase-like protein                               | ASMTL         | 0.85     | 0.86     |          |          | 0.86       | 0.01 | 2        | 5.6        | 2.42E-23 |
| Q6UWE0-1   | E3 ubiquitin-protein ligase LRSAM1                                               | LRSAM1        |          | 0.84     | 0.87     | 1.15     | 0.86       | 0.02 | 3        | 5.4        | 1.11E-03 |
| Q9P1Y6-1   | PHD and RING finger domain-containing protein 1                                  | KIAA1542      |          | 0.81     | 0.90     | 1.11     | 0.86       | 0.06 | 4        | 5          | 3.78E-11 |
| P57679     | Ellis-van Creveld syndrome protein                                               | EVC           | 0.91     | 0.80     |          |          | 0.86       | 0.08 | 2        | 2.6        | 7.37E-03 |
| B4DZ73     | cDNA FLJ59791, highly similar to Importin-11                                     | IPO11         | 0.92     |          | 0.79     | 1.27     | 0.86       | 0.09 | 5        | 9.3        | 2.78E-45 |
| O15234     | Cancer susceptibility candidate gene 3 protein                                   | CASC3         | 0.97     |          | 0.74     | 1.35     | 0.86       | 0.16 | 3        | 5.4        | 2.94E-10 |
| Q9Y6Y8-1   | SEC23-interacting protein                                                        | MSTP053       | 0.76     | 0.91     | 0.90     | 1.11     | 0.86       | 0.08 | 5        | 6.1        | 1.18E-17 |
| Q92556-1   | Engulfment and cell motility protein 1                                           | ELMO1         | 0.96     | 0.94     | 0.67     | 1.49     | 0.86       | 0.16 | 10       | 19         | 3.35E-59 |
| A4D212     | DKFZP586J0619 protein                                                            | DKFZP586J0619 | 1.04     | 0.94     | 0.59     | 1.69     | 0.86       | 0.24 | 6        | 3.4        | 2.12E-38 |
| Q8IXQ3     | Uncharacterized protein C9orf40                                                  | C9orf40       | 0.99     | 1.02     | 0.56     | 1.79     | 0.86       | 0.26 | 4        | 42         | 4.12E-17 |
| Q96T51-1   | FYVE-finger protein EIP1                                                         | RABIP4        | 0.93     | 0.81     | 0.83     | 1.20     | 0.86       | 0.06 | 5        | 11         | 7.81E-27 |
| Q96NB3     | Coiled-coil domain-containing protein 16                                         | CCDC16        | 0.91     | 0.94     | 0.72     | 1.39     | 0.86       | 0.12 | 5        | 18         | 6.69E-75 |
| Q96MX4     | cDNA FLJ31747 fis, clone NT2RI2007377, highly similar to RNA-BINDING PROTEIN EWS | EWSR1         | 0.79     | 0.78     | 1.00     | 1.00     | 0.86       | 0.12 | 6        | 15         | 9.64E-93 |

| UniProt ID | Protein_Name                                                                                       | Gene Name   | F1 (L/H) | F2 (L/H) | R1 (H/L) | R1 (L/H) | Mean (T/U) | S.D. | Pep. No. | %Seq. Cov. | PEP       |
|------------|----------------------------------------------------------------------------------------------------|-------------|----------|----------|----------|----------|------------|------|----------|------------|-----------|
| Q7Z2W4-1   | Zinc finger antiviral protein                                                                      | PRO1677     | 0.78     | 0.77     | 1.02     | 0.98     | 0.86       | 0.14 | 14       | 22         | 3.70E-265 |
| B3KNU0     | cDNA FLJ30470 fis, clone BRAWH1000040, highly similar to Rap1 GTPase-GDP dissociation stimulator 1 | RAP1GDS1    | 0.75     | 0.71     | 1.11     | 0.90     | 0.86       | 0.22 | 22       | 53         | 0.00E+00  |
| Q9BRD0-1   | BUD13 homolog                                                                                      | BUD13       | 0.67     | 0.79     | 1.11     | 0.90     | 0.86       | 0.23 | 2        | 3.2        | 1.29E-05  |
| Q9Y4W2-1   | Protein LAS1 homolog                                                                               | LAS1L       | 0.92     | 1.09     | 0.56     | 1.79     | 0.86       | 0.27 | 4        | 9.5        | 1.09E-14  |
| Q86Z22     | Putative uncharacterized protein                                                                   | P1725       | 0.61     | 0.62     | 1.34     | 0.75     | 0.86       | 0.42 | 5        | 26         | 2.00E-103 |
| P05107     | Cell surface adhesion glycoproteins LFA-1/CR3/p150,95 subunit beta                                 | CD18        | 0.86     | 0.87     | 0.85     | 1.18     | 0.86       | 0.01 | 16       | 24         | 1.39E-171 |
| Q13885     | Tubulin beta-2A chain                                                                              | TUBB2       | 0.83     | 0.89     | 0.86     | 1.16     | 0.86       | 0.03 | 21       | 54         | 0.00E+00  |
| Q9NSY1-1   | BMP-2-inducible protein kinase                                                                     | BIKE        | 0.83     |          | 0.89     | 1.12     | 0.86       | 0.04 | 4        | 6.3        | 4.66E-34  |
| P52294     | Importin subunit alpha-1                                                                           | KPNA1       | 0.88     | 0.90     | 0.80     | 1.25     | 0.86       | 0.05 | 5        | 11         | 1.58E-31  |
| Q8NF64-1   | PIAS-like protein Zimp7                                                                            | HRIHF B2007 | 0.82     |          | 0.90     | 1.11     | 0.86       | 0.06 | 2        | 4.5        | 2.55E-26  |
| Q86SZ2-1   | Trafficking protein particle complex subunit 6B                                                    | TRAPP C6B   |          | 0.82     | 0.90     | 1.11     | 0.86       | 0.06 | 2        | 11         | 1.50E-04  |
| P09972     | Brain-type aldolase                                                                                | ALDC        | 0.83     | 0.82     | 0.93     | 1.08     | 0.86       | 0.06 | 12       | 27         | 1.76E-236 |
| Q96SI9-1   | Spermatid perinuclear RNA-binding protein                                                          | SPNR        | 0.81     | 0.84     | 0.93     | 1.08     | 0.86       | 0.06 | 14       | 23         | 2.60E-100 |
| Q95819-3   | HPK/GCK-like kinase HGK                                                                            | HGK         | 0.85     | 0.78     | 0.95     | 1.05     | 0.86       | 0.09 | 16       | 13         | 1.12E-178 |
| Q86W50-1   | Methyltransferase 10 domain-containing protein                                                     | METT10D     | 0.81     | 1.00     | 0.77     | 1.30     | 0.86       | 0.12 | 4        | 7.5        | 1.44E-15  |
| Q96G25-2   | Activator-recruited cofactor 32 kDa component                                                      | MED8        | 0.95     |          | 0.77     | 1.30     | 0.86       | 0.13 | 5        | 24         | 1.06E-24  |
| Q5VIR6-1   | Vacuolar protein sorting-associated protein 53 homolog                                             | PP13624     | 0.75     |          | 0.97     | 1.03     | 0.86       | 0.16 | 3        | 7.5        | 2.79E-23  |
| P07766     | T-cell surface antigen T3/Leu-4 epsilon chain                                                      | CD3E        | 1.02     | 0.87     | 0.69     | 1.45     | 0.86       | 0.17 | 5        | 36         | 1.66E-82  |
| Q15542-1   | Transcription initiation factor TFIID 100 kDa subunit                                              | TAF2D       |          |          | 0.86     | 1.16     | 0.86       |      | 2        | 2.8        | 6.19E-07  |
| Q8N3P4     | Vacuolar protein sorting-associated protein 8 homolog                                              | KIAA0804    |          |          | 0.86     | 1.16     | 0.86       |      | 2        | 1.5        | 1.32E-04  |

| UniProt ID | Protein_Name                                                                       | Gene Name | F1 (L/H) | F2 (L/H) | R1 (H/L) | R1 (L/H) | Mean (T/U) | S.D. | Pep. No. | %Seq. Cov. | PEP       |
|------------|------------------------------------------------------------------------------------|-----------|----------|----------|----------|----------|------------|------|----------|------------|-----------|
| O43716     | GatC-like protein                                                                  | 15E1.2    | 0.86     |          |          |          | 0.86       |      | 2        | 21         | 5.92E-03  |
| Q9H967     | WD repeat-containing protein 76                                                    | WDR76     |          | 0.86     |          |          | 0.86       |      | 2        | 4.2        | 2.10E-02  |
| O76054     | Alpha-tocopherol-associated protein                                                | C22orf6   | 0.86     |          |          |          | 0.86       |      | 2        | 9.9        | 1.70E-04  |
| Q9H081     | Protein MIS12 homolog                                                              | MIS12     | 0.86     |          |          |          | 0.86       |      | 2        | 9.3        | 8.26E-08  |
| Q9BVS5     | Potential tRNA (adenine-N(1)-methyltransferase catalytic subunit TRMT61B           | TRMT61B   | 0.86     |          |          |          | 0.86       |      | 2        | 5          | 1.62E-02  |
| B4DH58     | cDNA FLJ56344, highly similar to Implantation-associated protein                   | IAG2      | 0.86     |          |          |          | 0.86       |      | 2        | 5.2        | 1.69E-03  |
| Q86U28     | HESB-like domain-containing protein 1                                              | HBLD1     | 0.86     |          |          |          | 0.86       |      | 2        | 13         | 2.96E-15  |
| Q76I76-1   | Protein phosphatase Slingshot homolog 2                                            | KIAA1725  | 0.86     |          |          |          | 0.86       |      | 2        | 3.9        | 2.05E-10  |
| B4DEF8     | cDNA FLJ61100, highly similar to 39S ribosomal protein L45, mitochondrial          | MRPL45    | 0.86     |          |          |          | 0.86       |      | 2        | 13         | 1.85E-07  |
| A8MW D6    | Putative uncharacterized protein MRPS36                                            | MRPS36    | 0.86     |          |          |          | 0.86       |      | 2        | 27         | 5.25E-05  |
| B4DFT0     | cDNA FLJ50476, weakly similar to Serine/threonine-protein kinase ULK1 (EC2.7.11.1) | ULK3      | 0.86     |          |          |          | 0.86       |      | 2        | 5.8        | 1.08E-02  |
| Q15773     | Myelodysplasia-myeloid leukemia factor 2                                           | MLF2      |          | 0.86     |          |          | 0.86       |      | 3        | 13         | 1.76E-06  |
| Q86VR2     | Protein FAM134C                                                                    | FAM134C   | 0.86     |          |          |          | 0.86       |      | 3        | 10         | 7.89E-31  |
| Q9HBL8     | NmrA-like family domain-containing protein 1                                       | HSCARG    | 0.86     |          |          |          | 0.86       |      | 3        | 12         | 2.25E-64  |
| Q4LE39-1   | 180 kDa Sin3-associated polypeptide                                                | ARID4B    |          | 0.86     |          |          | 0.86       |      | 4        | 3          | 1.23E-30  |
| Q13085-4   | ACC-alpha                                                                          | ACAC      | 0.86     |          |          |          | 0.86       |      | 5        | 3          | 4.67E-20  |
| P31321     | cAMP-dependent protein kinase type I-beta regulatory subunit                       | PRKAR1B   | 0.86     |          |          |          | 0.86       |      | 6        | 15         | 7.56E-05  |
| Q16644     | Chromosome 3p kinase                                                               | MAPK3     | 1.04     |          | 0.68     | 1.47     | 0.86       | 0.25 | 4        | 13         | 1.20E-10  |
| Q0P5N8     | TMSB4X protein                                                                     | TMSB4X    | 0.77     | 0.86     | 0.96     | 1.04     | 0.86       | 0.10 | 6        | 36         | 5.14E-39  |
| Q9Y5X3     | Sorting nexin-5                                                                    | SNX5      | 0.76     | 0.96     | 0.87     | 1.15     | 0.86       | 0.10 | 10       | 32         | 9.48E-120 |
| Q9P000     | COMM domain-                                                                       | COMM      | 0.74     | 0.86     | 0.99     | 1.01     | 0.86       | 0.13 | 8        | 57         | 7.04E-65  |

| UniProt ID | Protein_Name                                                                                                  | Gene Name   | F1 (L/H) | F2 (L/H) | R1 (H/L) | R1 (L/H) | Mean (T/U) | S.D. | Pep. No. | %Seq. Cov. | PEP       |
|------------|---------------------------------------------------------------------------------------------------------------|-------------|----------|----------|----------|----------|------------|------|----------|------------|-----------|
|            | containing protein 9                                                                                          | D9          |          |          |          |          |            |      |          |            |           |
| Q15067-1   | Palmitoyl-CoA oxidase                                                                                         | ACOX        | 0.81     | 0.76     | 1.02     | 0.98     | 0.86       | 0.14 | 8        | 18         | 2.36E-93  |
| Q5SRE5-1   | Nucleoporin NUP188 homolog                                                                                    | KIAA0169    | 0.78     | 1.14     | 0.67     | 1.49     | 0.86       | 0.25 | 5        | 4.2        | 5.77E-135 |
| P35221-2   | Alpha E-catenin                                                                                               | CTNNA1      | 0.73     | 0.69     | 1.17     | 0.85     | 0.86       | 0.27 | 5        | 6.7        | 2.18E-105 |
| O00499-1   | Amphiphysin II                                                                                                | AMPHL       | 0.61     | 0.43     | 1.55     | 0.65     | 0.86       | 0.60 | 3        | 8.3        | 2.89E-24  |
| O00182-1   | Ecalectin                                                                                                     | LGALS9      | 0.93     | 0.77     | 0.89     | 1.12     | 0.86       | 0.08 | 5        | 16         | 1.58E-63  |
| O43164-1   | E3 ubiquitin-protein ligase Praja-2                                                                           | KIAA0438    | 0.68     | 0.98     | 0.93     | 1.08     | 0.86       | 0.16 | 4        | 8.6        | 8.58E-100 |
| Q99471     | C-Myc-binding protein Mm-1                                                                                    | MM1         | 0.85     | 0.88     |          |          | 0.87       | 0.02 | 4        | 25         | 1.75E-171 |
| Q14807     | Kinesin-like DNA-binding protein                                                                              | KID         |          | 0.91     | 0.82     | 1.22     | 0.87       | 0.06 | 4        | 9.6        | 3.97E-74  |
| Q8WYP5-2   | Embryonic large molecule derived from yolk sac                                                                | AHCTF1      | 0.92     |          | 0.81     | 1.23     | 0.87       | 0.08 | 15       | 9.5        | 7.59E-65  |
| B3KSH1     | cDNA FLJ36192 fis, clone TESTI2027450, highly similar to Eukaryotic translation initiation factor 3 subunit 5 | hCG_1784554 | 0.88     | 0.94     | 0.78     | 1.28     | 0.87       | 0.08 | 8        | 29         | 6.51E-169 |
| Q86TU7-1   | SET domain-containing protein 3                                                                               | C14orf154   | 0.87     | 0.95     | 0.78     | 1.28     | 0.87       | 0.09 | 9        | 18         | 3.34E-110 |
| Q96KR1     | M-phase phosphoprotein homolog                                                                                | ZFR         | 1.01     | 0.83     | 0.76     | 1.32     | 0.87       | 0.13 | 13       | 20         | 1.25E-206 |
| O00151     | C-terminal LIM domain protein 1                                                                               | CLIM1       | 0.70     | 0.68     | 1.22     | 0.82     | 0.87       | 0.31 | 16       | 66         | 8.90E-136 |
| Q9H6Z4-1   | Ran-binding protein 3                                                                                         | RANBP3      | 0.59     | 0.69     | 1.32     | 0.76     | 0.87       | 0.40 | 7        | 15         | 1.56E-39  |
| Q8N1F7     | 93 kDa nucleoporin                                                                                            | KIAA0095    | 0.83     | 0.88     | 0.89     | 1.12     | 0.87       | 0.03 | 25       | 38         | 1.17E-254 |
| Q6DD88-1   | Atlastin-3                                                                                                    | ATL3        | 0.91     | 0.82     | 0.87     | 1.15     | 0.87       | 0.05 | 18       | 51         | 4.57E-281 |
| Q13765     | Alpha-NAC                                                                                                     | HSD48       | 0.81     | 0.94     | 0.85     | 1.18     | 0.87       | 0.07 | 5        | 7.6        | 8.17E-279 |
| Q9NRA8-1   | Eukaryotic translation initiation factor 4E nuclear import factor 1                                           | EIF4ENIF1   | 1.01     | 0.77     | 0.82     | 1.22     | 0.87       | 0.13 | 6        | 11         | 4.46E-25  |
| P60468     | Protein transport protein Sec61 subunit beta                                                                  | SEC61B      | 1.05     | 0.88     | 0.67     | 1.49     | 0.87       | 0.19 | 3        | 38         | 3.85E-08  |
| Q14011     | A18 hnRNP                                                                                                     | A18HNRNP    | 1.05     | 0.94     | 0.61     | 1.64     | 0.87       | 0.23 | 4        | 33         | 3.03E-131 |
| P27701     | C33 antigen                                                                                                   | CD82        | 0.69     | 0.62     | 1.29     | 0.78     | 0.87       | 0.37 | 2        | 7.1        | 1.44E-30  |
| B7Z2T0     | cDNA FLJ59513, highly similar to Sodium/potassium-                                                            | ATP1A3      | 1.16     |          | 0.58     | 1.72     | 0.87       | 0.41 | 17       | 18         | 6.37E-252 |

| UniProt ID | Protein_Name                                                             | Gene Name | F1 (L/H) | F2 (L/H) | R1 (H/L) | R1 (L/H) | Mean (T/U) | S.D. | Pep. No. | %Seq. Cov. | PEP       |
|------------|--------------------------------------------------------------------------|-----------|----------|----------|----------|----------|------------|------|----------|------------|-----------|
|            | transporting ATPase alpha-3 chain (EC 3.6.3.9)                           |           |          |          |          |          |            |      |          |            |           |
| O60870     | Binding to curved DNA                                                    | BTCD      |          | 0.86     | 0.88     | 1.14     | 0.87       | 0.01 | 3        | 8.1        | 2.68E-11  |
| Q8NDX1-1   | Exchange factor for ADP-ribosylation factor guanine nucleotide factor 6B | EFA6B     | 0.89     | 0.85     |          |          | 0.87       | 0.03 | 3        | 5.4        | 3.52E-25  |
| P60228     | Eukaryotic translation initiation factor 3 subunit 6                     | EIF3E     | 0.90     | 0.87     | 0.84     | 1.19     | 0.87       | 0.03 | 14       | 38         | 4.16E-65  |
| P82932     | 28S ribosomal protein S6, mitochondrial                                  | C21orf101 | 0.82     | 0.92     |          |          | 0.87       | 0.07 | 2        | 16         | 2.67E-03  |
| Q15397     | HBV XAg-transactivated protein 5                                         | KIAA0020  | 0.94     | 0.92     | 0.75     | 1.33     | 0.87       | 0.10 | 5        | 10         | 6.67E-33  |
| Q14C86-6   | GTPase-activating protein and VPS9 domain-containing protein 1           | GAPEX5    | 0.83     | 0.99     | 0.79     | 1.27     | 0.87       | 0.11 | 6        | 6.1        | 2.07E-32  |
| O95453     | Deadenylating nuclease                                                   | DAN       |          | 0.95     | 0.79     | 1.27     | 0.87       | 0.11 | 4        | 6.7        | 1.35E-05  |
| Q14651     | Intestine-specific plastin                                               | PLS1      | 0.91     | 0.99     | 0.71     | 1.41     | 0.87       | 0.14 | 8        | 19         | 6.29E-84  |
| O00399     | Dynactin subunit 6                                                       | DCTN6     | 0.76     | 0.98     |          |          | 0.87       | 0.16 | 2        | 9.5        | 1.04E-04  |
| P07858     | APP secretase                                                            | CPSB      | 1.05     | 0.85     | 0.71     | 1.41     | 0.87       | 0.17 | 4        | 17         | 1.03E-07  |
| A2A2L5     | Chromosome 20 open reading frame 43                                      | C20orf43  | 0.99     | 0.95     | 0.67     | 1.49     | 0.87       | 0.17 | 5        | 19         | 6.29E-43  |
| Q9H6D7-1   | HAUS augmin-like complex subunit 4                                       | C14orf94  |          | 1.03     | 0.71     | 1.41     | 0.87       | 0.23 | 2        | 6.1        | 2.99E-05  |
| Q96EP5-1   | DAZ-associated protein 1                                                 | DAZAP1    | 0.71     | 0.76     | 1.14     | 0.88     | 0.87       | 0.24 | 5        | 19         | 8.53E-96  |
| Q9BYD3-1   | 39S ribosomal protein L4, mitochondrial                                  | CDABP0091 | 0.68     | 0.74     | 1.19     | 0.84     | 0.87       | 0.28 | 2        | 11         | 4.85E-102 |
| Q2M2I8     | Adaptor-associated kinase 1                                              | AAK1      | 0.14     | 0.76     | 1.71     | 0.58     | 0.87       | 0.79 | 4        | 9.1        | 5.79E-67  |
| Q9H981     | Actin-related protein 8                                                  | ACTR8     |          |          | 0.87     | 1.15     | 0.87       |      | 2        | 3.5        | 6.74E-04  |
| P53367-2   | ADP-ribosylation factor-interacting protein 1                            | ARFIP1    |          |          | 0.87     | 1.15     | 0.87       |      | 2        | 8.5        | 3.45E-35  |
| O43149     | Zinc finger ZZ-type and EF-hand domain-containing protein 1              | KIAA0399  |          |          | 0.87     | 1.15     | 0.87       |      | 2        | 1.3        | 5.16E-23  |
| Q9P2R3-1   | Ankyrin repeat and FYVE domain-containing protein 1                      | ANKFY1    |          |          | 0.87     | 1.15     | 0.87       |      | 4        | 3.8        | 1.56E-12  |
| Q12770-1   | Sterol regulatory element-binding protein cleavage-activating protein    | KIAA0199  | 0.87     |          |          |          | 0.87       |      | 2        | 1.7        | 3.14E-04  |
| Q9Y3D5     | 28S ribosomal protein S18-1, mitochondrial                               | CGI134    | 0.87     |          |          |          | 0.87       |      | 2        | 22         | 3.20E-65  |

| UniProt ID | Protein_Name                                                                          | Gene Name | F1 (L/H) | F2 (L/H) | R1 (H/L) | R1 (L/H) | Mean (T/U) | S.D. | Pep. No. | %Seq. Cov. | PEP       |
|------------|---------------------------------------------------------------------------------------|-----------|----------|----------|----------|----------|------------|------|----------|------------|-----------|
| Q7L2Z9     | Centromere protein Q                                                                  | C6orf139  | 0.87     |          |          |          | 0.87       |      | 2        | 10         | 7.24E-04  |
| Q9NRP2     | Uncharacterized protein C16orf61                                                      | C16orf61  | 0.87     |          |          |          | 0.87       |      | 2        | 25         | 3.81E-11  |
| O60645-1   | Exocyst complex component 3                                                           | EXOC3     |          | 0.87     |          |          | 0.87       |      | 2        | 2.6        | 4.19E-03  |
| Q8NHH9-1   | ADP-ribosylation factor-like protein 6-interacting protein 2                          | ARL6IP2   | 0.87     |          |          |          | 0.87       |      | 2        | 4.3        | 4.43E-03  |
| B5MDA0     | Putative uncharacterized protein WDR73                                                | WDR73     | 0.87     |          |          |          | 0.87       |      | 2        | 9.1        | 1.19E-04  |
| Q8IZD4     | mRNA-decapping enzyme 1B                                                              | DCP1B     | 0.87     |          |          |          | 0.87       |      | 2        | 4.9        | 3.77E-05  |
| Q9H2P9-5   | Diphthamide biosynthesis methyltransferase                                            | AD-018    | 0.87     |          |          |          | 0.87       |      | 2        | 8.4        | 1.15E-152 |
| A8MTZ7     | Uncharacterized protein C12orf71                                                      | C12orf71  | 0.87     |          |          |          | 0.87       |      | 2        | 13         | 8.19E-03  |
| B4DKM0     | cDNA FLJ51883, highly similar to Mitochondrial 39S ribosomal protein L3               | MRL3      | 0.87     |          |          |          | 0.87       |      | 2        | 12         | 1.62E-02  |
| B3KUL1     | cDNA FLJ40132 fis, clone TESTI2012155, highly similar to NUCLEOPORIN-LIKE PROTEIN RIP | AGFG1     |          | 0.87     |          |          | 0.87       |      | 2        | 5.8        | 7.66E-20  |
| Q96MW5     | Component of oligomeric Golgi complex 8                                               | COG8      | 0.87     |          |          |          | 0.87       |      | 3        | 8.5        | 9.27E-08  |
| P56385     | ATP synthase subunit e, mitochondrial                                                 | ATP5I     |          | 0.87     |          |          | 0.87       |      | 3        | 33         | 3.87E-05  |
| Q9Y5B8     | Nucleoside diphosphate kinase 7                                                       | NME7      |          | 0.87     |          |          | 0.87       |      | 3        | 10         | 8.02E-16  |
| Q13905-2   | CRK SH3-binding GNRP                                                                  | GRF2      | 0.87     |          |          |          | 0.87       |      | 3        | 6.1        | 1.10E-32  |
| Q66PJ3-2   | ADP-ribosylation factor-like protein 6-interacting protein 4                          | ARL6IP4   | 0.87     |          |          |          | 0.87       |      | 3        | 13         | 4.72E-16  |
| Q8TEW0-1   | Atypical PKC isotype-specific-interacting protein                                     | PAR3      | 0.87     |          |          |          | 0.87       |      | 4        | 4.5        | 5.35E-08  |
| B4DHL6     | cDNA FLJ60542, highly similar to Protein vav-3                                        | VAV3      |          | 0.87     |          |          | 0.87       |      | 4        | 5.8        | 1.58E-05  |
| Q9NQT8     | Kinesin-like protein GAKIN                                                            | GAKIN     | 0.87     |          |          |          | 0.87       |      | 5        | 4.2        | 6.36E-18  |
| Q9Y5U2-1   | Protein TSSC4                                                                         | TSSC4     | 0.87     |          |          |          | 0.87       |      | 5        | 17         | 2.85E-09  |
| Q9P260-1   | LisH domain and HEAT repeat-containing protein KIAA1468                               | KIAA1468  | 0.87     |          |          |          | 0.87       |      | 5        | 5.3        | 6.43E-73  |



| UniProt ID | Protein_Name                                                         | Gene Name        | F1 (L/H) | F2 (L/H) | R1 (H/L) | R1 (L/H) | Mean (T/U) | S.D. | Pep. No. | %Seq. Cov. | PEP       |
|------------|----------------------------------------------------------------------|------------------|----------|----------|----------|----------|------------|------|----------|------------|-----------|
| Q9P287-2   | BRCA2 and CDKN1A-interacting protein                                 | BCCIP            | 0.93     | 0.75     | 0.93     | 1.08     | 0.87       | 0.10 | 4        | 19         | 6.18E-44  |
| O00139-2   | Kinesin-2                                                            | KIF2             | 0.81     | 0.80     | 1.00     | 1.00     | 0.87       | 0.11 | 13       | 21         | 2.49E-79  |
| P12955     | Imidodipeptidase                                                     | PEPD             | 0.77     | 0.76     | 1.08     | 0.93     | 0.87       | 0.18 | 5        | 15         | 6.20E-39  |
| Q8N5A5-1   | G patch domain-containing protein 6                                  | GPATC6           | 0.75     | 0.78     | 1.08     | 0.93     | 0.87       | 0.18 | 5        | 12         | 3.36E-37  |
| C9JS35     | Putative uncharacterized protein UFD1L                               | UFD1L            | 0.86     | 0.87     | 0.89     | 1.12     | 0.87       | 0.02 | 7        | 29         | 4.92E-41  |
| P62857     | 40S ribosomal protein S28                                            | RPS28            | 0.88     | 0.89     | 0.85     | 1.18     | 0.87       | 0.02 | 5        | 57         | 1.85E-88  |
| P13984     | ATP-dependent helicase GTF2F2                                        | GTF2F2           | 0.85     | 0.84     | 0.93     | 1.08     | 0.87       | 0.05 | 8        | 33         | 1.30E-30  |
| Q5W0H4     | Tumor protein, translationally-controlled 1                          | RP11-290D2.1-004 | 0.83     | 0.86     | 0.93     | 1.08     | 0.87       | 0.05 | 10       | 79         | 1.36E-94  |
| Q9P2I0     | Cleavage and polyadenylation specificity factor 100 kDa subunit      | CPSF100          | 0.77     | 0.98     | 0.87     | 1.15     | 0.87       | 0.11 | 8        | 13         | 2.92E-69  |
| O14737     | Programmed cell death protein 5                                      | PDCD5            | 0.96     | 0.93     | 0.73     | 1.37     | 0.87       | 0.13 | 5        | 47         | 5.39E-161 |
| Q8TBC4     | NEDD8-activating enzyme E1 catalytic subunit                         | UBA3             | 0.85     | 0.76     | 1.01     | 0.99     | 0.87       | 0.13 | 7        | 24         | 1.04E-30  |
| O43663-1   | Protein regulator of cytokinesis 1                                   | PRC1             | 0.92     | 1.00     | 0.70     | 1.43     | 0.87       | 0.16 | 6        | 12         | 2.54E-10  |
| Q9Y679-1   | Ancient ubiquitous protein 1                                         | AUP1             | 0.98     | 0.96     | 0.68     | 1.47     | 0.87       | 0.17 | 3        | 10         | 1.04E-20  |
| Q9Y4B6-1   | DDB1- and CUL4-associated factor 1                                   | DCAF1            |          | 0.87     | 0.88     | 1.14     | 0.88       | 0.01 | 2        | 1.4        | 3.86E-07  |
| Q9NQP4     | Prefoldin subunit 4                                                  | PFD4             | 0.90     | 0.85     |          |          | 0.88       | 0.04 | 2        | 20         | 7.42E-73  |
| Q96RN5-1   | Activator-recruited cofactor 105 kDa component                       | ARC105           | 0.92     |          | 0.83     | 1.20     | 0.88       | 0.06 | 2        | 6.1        | 1.80E-78  |
| P61764-2   | N-Sec1                                                               | STXBP1           | 0.92     | 0.83     |          |          | 0.88       | 0.06 | 3        | 4.8        | 6.83E-05  |
| Q5T447-1   | HECT domain-containing protein 3                                     | HECTD3           | 0.82     |          | 0.93     | 1.08     | 0.88       | 0.08 | 3        | 5.3        | 3.42E-21  |
| Q9P107     | GEM-interacting protein                                              | GMIP             | 0.93     |          | 0.82     | 1.22     | 0.88       | 0.08 | 6        | 11         | 3.35E-81  |
| Q92733     | Papillary renal cell carcinoma translocation-associated gene protein | PRCC             |          | 0.94     | 0.81     | 1.23     | 0.88       | 0.09 | 3        | 9          | 8.92E-58  |
| P16333     | Cytoplasmic protein NCK1                                             | NCK              |          | 0.73     | 1.02     | 0.98     | 0.88       | 0.21 | 3        | 8.5        | 9.39E-06  |
| Q5VYK3     | Proteasome-associated protein ECM29                                  | ECM29            | 1.10     |          | 0.65     | 1.54     | 0.88       | 0.32 | 7        | 5.2        | 5.27E-35  |

| UniProt ID | Protein_Name                                                      | Gene Name | F1 (L/H) | F2 (L/H) | R1 (H/L) | R1 (L/H) | Mean (T/U) | S.D. | Pep. No. | %Seq. Cov. | PEP       |
|------------|-------------------------------------------------------------------|-----------|----------|----------|----------|----------|------------|------|----------|------------|-----------|
|            | homolog                                                           |           |          |          |          |          |            |      |          |            |           |
| Q9H4L5-1   | Oxysterol-binding protein-related protein 3                       | KIAA0704  |          | 0.63     | 1.12     | 0.89     | 0.88       | 0.35 | 3        | 3.8        | 1.65E-06  |
| Q13573     | Nuclear protein SkiP                                              | SKIIP     | 0.89     | 0.85     | 0.89     | 1.12     | 0.88       | 0.02 | 10       | 22         | 3.60E-59  |
| Q9C0C9     | Ubiquitin carrier protein O                                       | KIAA1734  | 0.89     | 0.89     | 0.85     | 1.18     | 0.88       | 0.02 | 12       | 15         | 1.72E-53  |
| P06239-3   | Lymphocyte cell-specific protein-tyrosine kinase                  | LCK       | 0.90     | 0.89     | 0.84     | 1.19     | 0.88       | 0.03 | 16       | 40         | 9.27E-210 |
| O95373     | Importin-7                                                        | IPO7      | 0.90     | 0.82     | 0.91     | 1.10     | 0.88       | 0.05 | 9        | 12         | 9.55E-78  |
| Q6NW29     | Protein FAM28A                                                    | FAM28A    | 0.88     | 0.93     | 0.82     | 1.22     | 0.88       | 0.06 | 3        | 15         | 1.32E-10  |
| P62081     | 40S ribosomal protein S7                                          | RPS7      | 0.89     | 0.93     | 0.81     | 1.23     | 0.88       | 0.06 | 13       | 71         | 4.22E-129 |
| Q53G62     | Mitochondrial ribosomal protein S28 variant                       | HSPC007   | 0.81     | 0.82     | 1.00     | 1.00     | 0.88       | 0.11 | 5        | 31         | 2.24E-61  |
| P49366-1   | Deoxyhypusine synthase                                            | DHPS      | 0.96     | 0.98     | 0.69     | 1.45     | 0.88       | 0.16 | 8        | 32         | 7.34E-126 |
| Q9Y371-1   | Bax-interacting factor 1                                          | CGI-61    | 0.72     | 0.83     | 1.08     | 0.93     | 0.88       | 0.18 | 9        | 30         | 9.32E-99  |
| Q15054     | DNA polymerase delta subunit 3                                    | KIAA0039  | 0.77     | 0.76     | 1.10     | 0.91     | 0.88       | 0.19 | 5        | 12         | 7.08E-32  |
| Q9UBV2-1   | Protein sel-1 homolog 1                                           | SEL1L     | 0.70     | 1.09     | 0.84     | 1.19     | 0.88       | 0.20 | 3        | 7.2        | 1.68E-20  |
| P11182     | Branched-chain alpha-keto acid dehydrogenase complex component E2 | BCATE2    |          | 0.82     | 0.94     | 1.06     | 0.88       | 0.08 | 2        | 4.8        | 9.16E-80  |
| P50851-1   | Beige-like protein                                                | BGL       |          | 0.82     | 0.94     | 1.06     | 0.88       | 0.08 | 3        | 1.6        | 8.44E-13  |
| A3KN83-1   | Monocyte protein 3                                                | MOP3      | 0.94     |          | 0.82     | 1.22     | 0.88       | 0.08 | 8        | 10         | 4.28E-55  |
| Q15361     | RNA polymerase I termination factor                               | TTF1      | 0.83     | 0.83     | 0.98     | 1.02     | 0.88       | 0.09 | 4        | 6.6        | 7.98E-24  |
| P09132     | Signal recognition particle 19 kDa protein                        | SRP19     | 0.98     | 0.88     | 0.78     | 1.28     | 0.88       | 0.10 | 4        | 29         | 7.83E-133 |
| Q13618-1   | Cullin-3                                                          | CUL3      | 0.91     | 0.97     | 0.76     | 1.32     | 0.88       | 0.11 | 7        | 12         | 5.88E-53  |
| P54709     | Sodium/potassium-dependent ATPase subunit beta-3                  | ATP1B3    | 0.90     | 0.98     | 0.76     | 1.32     | 0.88       | 0.11 | 2        | 6.8        | 1.64E-07  |
| Q9NZ63     | Hepatocellular carcinoma-associated antigen 59                    | C9orf78   | 0.82     | 0.75     | 1.07     | 0.93     | 0.88       | 0.17 | 6        | 18         | 1.12E-26  |
| P78347-1   | Bruton tyrosine kinase-associated protein 135                     | BAP135    | 0.78     | 0.73     | 1.13     | 0.88     | 0.88       | 0.22 | 17       | 23         | 2.31E-106 |
| Q9BUR4     | Telomerase Cajal body protein 1                                   | TCAB1     | 1.16     | 0.74     | 0.74     | 1.35     | 0.88       | 0.24 | 3        | 11         | 1.54E-45  |

| UniProt ID | Protein_Name                                                                                               | Gene Name | F1 (L/H) | F2 (L/H) | R1 (H/L) | R1 (L/H) | Mean (T/U) | S.D. | Pep. No. | %Seq. Cov. | PEP       |
|------------|------------------------------------------------------------------------------------------------------------|-----------|----------|----------|----------|----------|------------|------|----------|------------|-----------|
| Q13464     | Renal carcinoma antigen NY-REN-35                                                                          | ROCK1     | 0.72     | 0.76     | 1.16     | 0.86     | 0.88       | 0.24 | 14       | 12         | 1.21E-48  |
| Q14258     | E3 ubiquitin/ISG15 ligase TRIM25                                                                           | EFP       | 1.15     |          | 0.61     | 1.64     | 0.88       | 0.38 | 5        | 13         | 5.02E-167 |
| Q4VBZ6     | EEF1D protein                                                                                              | EEF1D     | 0.88     | 0.88     |          |          | 0.88       | 0.00 | 11       | 55         | 8.15E-259 |
| Q96QE3-1   | ATPase family AAA domain-containing protein 5                                                              | ATAD5     |          | 0.87     | 0.89     | 1.12     | 0.88       | 0.01 | 2        | 1.3        | 6.13E-41  |
| Q01518-1   | Adenylyl cyclase-associated protein 1                                                                      | CAP       | 0.86     | 0.87     | 0.91     | 1.10     | 0.88       | 0.03 | 28       | 64         | 0.00E+00  |
| P49459     | RAD6 homolog A                                                                                             | RAD6A     | 0.86     |          | 0.90     | 1.11     | 0.88       | 0.03 | 2        | 7.2        | 5.65E-18  |
| B7Z596     | cDNA FLJ55130, highly similar to Rattus norvegicus tropomyosin 1, alpha (Tpm1), transcript variant 8, mRNA | hCG_33495 | 0.92     |          | 0.84     | 1.19     | 0.88       | 0.06 | 9        | 24         | 8.71E-75  |
| O95989     | Diadenosine 5,5-P1,P6-hexaphosphate hydrolase 1                                                            | DIPP      | 0.83     | 0.93     |          |          | 0.88       | 0.07 | 4        | 25         | 1.74E-07  |
| O43491     | Band 4.1-like protein 2                                                                                    | EPB41L2   | 0.79     | 0.85     | 1.00     | 1.00     | 0.88       | 0.11 | 26       | 32         | 2.07E-175 |
| A8K0H3     | cDNA FLJ78093, highly similar to Homo sapiens ribosomal protein L29 (RPL29), mRNA                          | RPL29     | 1.02     | 0.74     | 0.88     | 1.14     | 0.88       | 0.14 | 3        | 20         | 4.23E-25  |
| Q9NV M9    | Cell cycle regulator Mat89Bb homolog                                                                       | C12orf11  |          | 0.98     | 0.78     | 1.28     | 0.88       | 0.14 | 3        | 4.4        | 2.15E-18  |
| P36507     | Dual specificity mitogen-activated protein kinase kinase 2                                                 | MAP2K2    | 0.77     | 0.81     | 1.06     | 0.94     | 0.88       | 0.16 | 15       | 52         | 3.16E-92  |
| Q15645-1   | Human papillomavirus type 16 E1 protein-binding protein                                                    | TRIP13    | 0.91     | 1.04     | 0.69     | 1.45     | 0.88       | 0.18 | 12       | 38         | 1.26E-123 |
| Q969G3-1   | BRG1-associated factor 57                                                                                  | BAF57     | 0.74     | 0.82     | 1.08     | 0.93     | 0.88       | 0.18 | 10       | 26         | 7.91E-54  |
| Q86U90     | Dopamine receptor-interacting protein 3                                                                    | DRIP3     | 1.08     | 0.98     | 0.58     | 1.72     | 0.88       | 0.26 | 9        | 46         | 4.25E-84  |
| Q9GZS1-1   | DNA-directed RNA polymerase I subunit E                                                                    | PAF53     |          | 1.07     | 0.69     | 1.45     | 0.88       | 0.27 | 5        | 11         | 1.19E-17  |
| Q02952-1   | A-kinase anchor protein 12                                                                                 | AKAP12    |          |          | 0.88     | 1.14     | 0.88       |      | 5        | 5.5        | 9.66E-57  |
| P51610-1   | C1 factor                                                                                                  | HCF1      |          |          | 0.88     | 1.14     | 0.88       |      | 27       | 21         | 4.30E-174 |
| P22415     | Class B basic helix-loop-helix protein 11                                                                  | BHLHB11   |          | 0.88     |          |          | 0.88       |      | 2        | 5.5        | 1.24E-03  |
| Q9Y467     | Sal-like protein 2                                                                                         | KIAA0360  | 0.88     |          |          |          | 0.88       |      | 2        | 2.9        | 1.89E-64  |
| Q9P0J7     | E3 ubiquitin-protein ligase KCMF1                                                                          | FIGC      | 0.88     |          |          |          | 0.88       |      | 2        | 8.1        | 4.53E-04  |
| B4DW       | cDNA FLJ55258,                                                                                             | APPD      |          | 0.88     |          |          | 0.88       |      | 2        | 6          | 5.48E-04  |

| UniProt ID | Protein_Name                                                                                  | Gene Name | F1 (L/H) | F2 (L/H) | R1 (H/L) | R1 (L/H) | Mean (T/U) | S.D. | Pep. No. | %Seq. Cov. | PEP       |
|------------|-----------------------------------------------------------------------------------------------|-----------|----------|----------|----------|----------|------------|------|----------|------------|-----------|
| N9         | highly similar to Homo sapiens pleckstrin homology domain containing, family F member 1, mRNA |           |          |          |          |          |            |      |          |            |           |
| P30260     | Anaphase-promoting complex subunit 3                                                          | ANAPC3    |          | 0.88     |          |          | 0.88       |      | 2        | 3.5        | 4.98E-04  |
| Q8N8N7-1   | 15-oxoprostaglandin 13-reductase                                                              | PTGR2     | 0.88     |          |          |          | 0.88       |      | 3        | 11         | 1.85E-30  |
| Q8WUW1-2   | Probable protein BRICK1                                                                       | C3orf10   | 0.88     |          |          |          | 0.88       |      | 3        | 31         | 4.07E-22  |
| Q7Z3U7-1   | Protein MON2 homolog                                                                          | KIAA1040  |          | 0.88     |          |          | 0.88       |      | 3        | 2.1        | 2.08E-47  |
| O75600     | 2-amino-3-ketobutyrate coenzyme A ligase, mitochondrial                                       | GCAT      | 0.88     |          |          |          | 0.88       |      | 3        | 13         | 1.47E-106 |
| A6NCE7     | Microtubule-associated proteins 1A/1B light chain 3 beta 2                                    | MAP1LC3B2 | 0.88     |          |          |          | 0.88       |      | 4        | 21         | 2.07E-07  |
| Q04206-1   | Nuclear factor NF-kappa-B p65 subunit                                                         | NFKB3     |          | 0.88     |          |          | 0.88       |      | 4        | 7.6        | 2.09E-15  |
| Q9Y2I7     | 1-phosphatidylinositol-3-phosphate 5-kinase                                                   | KIAA0981  | 0.88     |          |          |          | 0.88       |      | 4        | 2          | 1.56E-05  |
| Q92769-2   | Histone deacetylase 2                                                                         | HDAC2     | 0.88     |          |          |          | 0.88       |      | 5        | 11         | 2.53E-84  |
| P49590     | Histidine--tRNA ligase                                                                        | HARS2     | 0.88     |          |          |          | 0.88       |      | 6        | 16         | 3.34E-09  |
| A6NKH4     | Putative uncharacterized protein SNX1                                                         | hCG_33348 | 0.88     |          |          |          | 0.88       |      | 8        | 21         | 1.10E-40  |
| P46934-1   | Cell proliferation-inducing gene 53 protein                                                   | KIAA0093  | 0.88     |          |          |          | 0.88       |      | 10       | 12         | 1.93E-54  |
| Q6XZF7-1   | Dynamin-binding protein                                                                       | DNMBP     | 0.88     |          |          |          | 0.88       |      | 12       | 9.8        | 7.65E-22  |
| Q9NSK0-3   | Kinesin light chain 4                                                                         | KLC4      | 0.88     |          |          |          | 0.88       |      | 17       | 35         | 1.01E-267 |
| Q96J01     | hTREX45                                                                                       | THOC3     | 1.11     |          | 0.65     | 1.54     | 0.88       | 0.33 | 3        | 12         | 1.10E-05  |
| Q99613     | Eukaryotic translation initiation factor 3 subunit 8                                          | EIF3C     | 0.84     | 0.92     | 0.89     | 1.12     | 0.88       | 0.04 | 31       | 33         | 5.26E-298 |
| P63208-1   | Cyclin-A/CDK2-associated protein p19                                                          | EMC19     | 0.96     | 0.81     | 0.88     | 1.14     | 0.88       | 0.08 | 7        | 52         | 3.16E-77  |
| P15428     | 15-hydroxyprostaglandin dehydrogenase [NAD+]                                                  | HPGD      | 0.82     | 0.82     | 1.01     | 0.99     | 0.88       | 0.11 | 5        | 26         | 1.58E-31  |
| Q15021     | Chromosome condensation-related                                                               | CAPD2     | 1.00     | 0.92     | 0.73     | 1.37     | 0.88       | 0.14 | 28       | 29         | 0.00E+00  |

| UniProt ID | Protein_Name                                                  | Gene Name | F1 (L/H) | F2 (L/H) | R1 (H/L) | R1 (L/H) | Mean (T/U) | S.D. | Pep. No. | %Seq. Cov. | PEP       |
|------------|---------------------------------------------------------------|-----------|----------|----------|----------|----------|------------|------|----------|------------|-----------|
|            | SMC-associated protein 1                                      |           |          |          |          |          |            |      |          |            |           |
| Q9BRT8-1   | Cobalamin synthase W domain-containing protein 1              | CBWD1     | 0.68     | 0.97     | 1.00     | 1.00     | 0.88       | 0.18 | 3        | 11         | 6.74E-90  |
| Q86V81     | Ally of AML-1 and LEF-1                                       | ALY       | 0.89     | 0.63     | 1.13     | 0.88     | 0.88       | 0.25 | 8        | 45         | 1.45E-78  |
| Q9UBQ5     | eIF-3 p25                                                     | ARG134    | 0.92     | 0.97     | 0.76     | 1.32     | 0.88       | 0.11 | 6        | 33         | 4.68E-100 |
| Q8NI08-1   | 140 kDa estrogen receptor-associated protein                  | ERAP140   | 1.07     | 0.79     | 0.79     | 1.27     | 0.88       | 0.16 | 2        | 3.1        | 2.61E-05  |
| O60869-1   | Endothelial differentiation-related factor 1                  | EDF1      | 0.85     | 1.06     | 0.74     | 1.35     | 0.88       | 0.16 | 3        | 24         | 5.30E-25  |
| Q6JBY9-1   | CapZ-interacting protein                                      | CAPZ1P    | 0.77     | 0.77     | 1.11     | 0.90     | 0.88       | 0.20 | 10       | 31         | 5.86E-115 |
| P82675-1   | 28S ribosomal protein S5, mitochondrial                       | MRPS5     | 0.80     | 0.97     |          |          | 0.89       | 0.12 | 3        | 8.6        | 7.13E-20  |
| O60888-2   | Acetylcholinesterase-associated protein                       | ACHAP     | 1.03     |          | 0.74     | 1.35     | 0.89       | 0.21 | 3        | 30         | 1.31E-39  |
| O75592-1   | Myc-binding protein 2                                         | KIAA0916  | 0.69     |          | 1.08     | 0.93     | 0.89       | 0.28 | 2        | 0.6        | 3.47E-17  |
| P17706-1   | T-cell protein-tyrosine phosphatase                           | PTPN2     |          | 1.09     | 0.68     | 1.47     | 0.89       | 0.29 | 2        | 7.5        | 2.37E-04  |
| Q9NRX2     | 39S ribosomal protein L17, mitochondrial                      | LIP2      | 0.58     |          | 1.19     | 0.84     | 0.89       | 0.43 | 4        | 30         | 3.65E-27  |
| Q9BPX3     | Chromosome-associated protein G                               | CAPG      | 0.95     | 0.87     | 0.84     | 1.19     | 0.89       | 0.06 | 16       | 21         | 8.15E-198 |
| Q7Z4Q2-1   | HEAT repeat-containing protein 3                              | HEATR3    | 0.90     | 0.89     | 0.87     | 1.15     | 0.89       | 0.02 | 3        | 4          | 5.37E-05  |
| B7Z4C8     | cDNA FLJ57527, highly similar to 60S ribosomal protein L31    | RPL31     | 0.88     | 0.91     | 0.87     | 1.15     | 0.89       | 0.02 | 5        | 33         | 1.97E-48  |
| Q96H20-1   | ELL-associated protein of 30 kDa                              | EAP30     | 0.86     | 0.90     | 0.90     | 1.11     | 0.89       | 0.02 | 5        | 26         | 9.27E-52  |
| Q13148     | TAR DNA-binding protein 43                                    | TARDBP    | 0.89     | 0.91     | 0.86     | 1.16     | 0.89       | 0.03 | 13       | 45         | 0.00E+00  |
| Q3KQU3-1   | Arginine/proline-rich coiled-coil domain-containing protein 1 | KIAA1187  | 0.88     | 0.85     | 0.93     | 1.08     | 0.89       | 0.04 | 19       | 24         | 6.16E-113 |
| Q9HC36     | RNA methyltransferase-like protein 1                          | HC90      | 0.90     | 0.84     | 0.92     | 1.09     | 0.89       | 0.04 | 5        | 17         | 3.01E-13  |
| P49005     | DNA polymerase delta subunit 2                                | POLD2     | 0.91     | 0.81     | 0.94     | 1.06     | 0.89       | 0.07 | 6        | 14         | 1.41E-70  |
| P49916-1   | DNA ligase 3                                                  | LIG3      | 0.83     | 0.86     | 0.97     | 1.03     | 0.89       | 0.07 | 13       | 19         | 4.07E-126 |
| Q9UKX7     | 50 kDa nucleoporin                                            | NPAP60L   | 0.80     | 0.93     | 0.93     | 1.08     | 0.89       | 0.08 | 14       | 39         | 1.53E-186 |
| P53582     | Methionine aminopeptidase 1                                   | KIAA0094  | 0.82     | 0.86     | 0.98     | 1.02     | 0.89       | 0.08 | 9        | 38         | 2.38E-96  |

| UniProt ID | Protein_Name                                                                                     | Gene Name       | F1 (L/H) | F2 (L/H) | R1 (H/L) | R1 (L/H) | Mean (T/U) | S.D. | Pep. No. | %Seq. Cov. | PEP       |
|------------|--------------------------------------------------------------------------------------------------|-----------------|----------|----------|----------|----------|------------|------|----------|------------|-----------|
| B4DEE8     | cDNA FLJ56323, highly similar to Methylated-DNA--protein-cysteinemethyltransferase (EC 2.1.1.63) | MGMT            | 0.80     | 0.89     | 0.97     | 1.03     | 0.89       | 0.09 | 6        | 35         | 3.70E-129 |
| Q96QF2     | Ovarian/Breast septin epsilon                                                                    | Ov/Br septin    | 0.82     | 0.85     | 0.99     | 1.01     | 0.89       | 0.09 | 24       | 43         | 5.29E-153 |
| Q8TDX7     | Never in mitosis A-related kinase 7                                                              | NEK7            | 0.86     | 0.81     | 0.99     | 1.01     | 0.89       | 0.09 | 8        | 33         | 4.42E-37  |
| P20290-1   | RNA polymerase B transcription factor 3                                                          | BTF3            | 0.95     | 0.97     | 0.74     | 1.35     | 0.89       | 0.13 | 14       | 75         | 5.78E-162 |
| A7YIJ8     | Radixin isoform b                                                                                | hCG_39182       | 0.82     | 0.80     | 1.04     | 0.96     | 0.89       | 0.13 | 20       | 29         | 3.56E-111 |
| Q8IXH7-1   | Negative elongation factor C/D                                                                   | HSPC130         | 1.02     | 0.89     | 0.75     | 1.33     | 0.89       | 0.14 | 4        | 8.3        | 1.19E-17  |
| A0PJ72     | ABCF1 protein                                                                                    | ABCF1           | 0.74     | 0.89     | 1.03     | 0.97     | 0.89       | 0.15 | 5        | 11         | 3.27E-244 |
| O95551-2   | 5-tyrosyl-DNA phosphodiesterase                                                                  | AD-022          | 0.94     | 1.00     | 0.72     | 1.39     | 0.89       | 0.15 | 5        | 15         | 8.67E-15  |
| Q13451     | 51 kDa FK506-binding protein                                                                     | AIG6            | 0.80     | 0.79     | 1.07     | 0.93     | 0.89       | 0.16 | 5        | 13         | 2.36E-29  |
| P63172     | Dynein light chain Tctex-type 1                                                                  | DYNLT1          | 1.08     | 0.79     | 0.79     | 1.27     | 0.89       | 0.17 | 2        | 25         | 1.37E-69  |
| P22681     | Casitas B-lineage lymphoma proto-oncogene                                                        | CBL             | 0.79     | 0.78     | 1.09     | 0.92     | 0.89       | 0.18 | 10       | 14         | 4.13E-32  |
| P48449     | 2,3-epoxysqualene--lanosterol cyclase                                                            | LSS             | 1.03     | 0.95     | 0.68     | 1.47     | 0.89       | 0.18 | 6        | 9.4        | 3.94E-37  |
| O60496     | Docking protein 2                                                                                | DOK2            | 0.71     | 0.81     | 1.14     | 0.88     | 0.89       | 0.23 | 5        | 14         | 1.17E-43  |
| Q9Y4Z0     | Glycine-rich protein                                                                             | LSM4            | 1.04     | 1.08     | 0.54     | 1.85     | 0.89       | 0.30 | 4        | 19         | 9.62E-12  |
| O75380     | Complex I-13kD-A                                                                                 | NDUFS6          | 0.68     | 0.68     | 1.30     | 0.77     | 0.89       | 0.36 | 3        | 35         | 5.37E-06  |
| P16989-1   | Cold shock domain-containing protein A                                                           | CSDA            | 1.10     | 1.13     | 0.43     | 2.33     | 0.89       | 0.40 | 13       | 50         | 5.55E-223 |
| P16150     | Galactoglycoprotein                                                                              | CD43            | 0.55     | 0.78     | 1.33     | 0.75     | 0.89       | 0.40 | 2        | 4.5        | 5.28E-04  |
| Q9Y294     | Anti-silencing function protein 1 homolog A                                                      | ASF1A           | 1.24     | 1.24     | 0.18     | 5.56     | 0.89       | 0.61 | 6        | 48         | 2.49E-44  |
| B2REA7     | Ribosomal protein L36a                                                                           | RP1-164F3.1-004 |          | 0.96     | 0.82     | 1.22     | 0.89       | 0.10 | 6        | 37         | 1.57E-16  |
| P25398     | 40S ribosomal protein S12                                                                        | RPS12           | 0.91     | 0.90     | 0.86     | 1.16     | 0.89       | 0.03 | 9        | 61         | 5.12E-83  |
| B7Z3A4     | cDNA FLJ56906, highly similar to RNA-binding protein 16                                          | CCAP7           | 0.87     |          | 0.91     | 1.10     | 0.89       | 0.03 | 6        | 7.2        | 1.28E-32  |
| P11940-1   | Polyadenylate-binding protein 1                                                                  | PAB1            | 0.90     | 0.92     | 0.85     | 1.18     | 0.89       | 0.04 | 31       | 46         | 0.00E+00  |
| Q8NFH3     | Nucleoporin Nup43                                                                                | NUP43           | 0.86     |          | 0.92     | 1.09     | 0.89       | 0.04 | 3        | 14         | 1.81E-23  |

| UniProt ID | Protein_Name                                                                                                 | Gene Name | F1 (L/H) | F2 (L/H) | R1 (H/L) | R1 (L/H) | Mean (T/U) | S.D. | Pep. No. | %Seq. Cov. | PEP       |
|------------|--------------------------------------------------------------------------------------------------------------|-----------|----------|----------|----------|----------|------------|------|----------|------------|-----------|
| Q9NUQ9     | Protein FAM49B                                                                                               | BM-009    | 0.88     | 0.85     | 0.94     | 1.06     | 0.89       | 0.05 | 12       | 50         | 2.41E-210 |
| Q6IBW4-4   | Chromosome-associated protein H2                                                                             | CAPH2     | 0.93     |          | 0.85     | 1.18     | 0.89       | 0.06 | 3        | 9.1        | 2.61E-22  |
| O75348     | Vacuolar proton pump subunit G 1                                                                             | ATP6G     | 0.93     | 0.85     |          |          | 0.89       | 0.06 | 3        | 36         | 3.97E-106 |
| P35219     | Carbonic anhydrase VIII                                                                                      | CA8       | 0.93     | 0.85     |          |          | 0.89       | 0.06 | 3        | 19         | 5.61E-17  |
| B7Z1E5     | cDNA FLJ58752, highly similar to Homo sapiens RCD1 required for cell differentiation 1 homolog (RQCD1), mRNA | RCD1      | 0.89     | 0.82     | 0.96     | 1.04     | 0.89       | 0.07 | 2        | 8.8        | 6.21E-25  |
| Q9H6T3-1   | RNA polymerase II-associated protein 3                                                                       | RPAP3     | 0.97     | 0.87     | 0.83     | 1.20     | 0.89       | 0.07 | 7        | 13         | 5.96E-116 |
| P48729-2   | Casein kinase I isoform alpha                                                                                | CSNK1A1   | 0.94     | 0.95     | 0.78     | 1.28     | 0.89       | 0.10 | 3        | 11         | 1.49E-126 |
| P23258     | Gamma-1-tubulin                                                                                              | TUBG      | 0.93     | 0.78     | 0.96     | 1.04     | 0.89       | 0.10 | 10       | 35         | 3.50E-101 |
| Q15276-1   | Rab GTPase-binding effector protein 1                                                                        | RAB5EP    |          | 0.97     | 0.81     | 1.23     | 0.89       | 0.11 | 5        | 6.7        | 5.56E-55  |
| O75821     | eIF3 p42                                                                                                     | EIF3G     | 0.95     | 0.97     | 0.75     | 1.33     | 0.89       | 0.12 | 11       | 33         | 7.22E-96  |
| Q8WTT2     | Factor for adipocyte differentiation 24                                                                      | AD24      | 0.99     | 0.94     | 0.74     | 1.35     | 0.89       | 0.13 | 9        | 14         | 3.03E-119 |
| C9JXC1     | Putative uncharacterized protein RRM2                                                                        | RRM2      | 0.97     | 0.98     | 0.72     | 1.39     | 0.89       | 0.15 | 11       | 35         | 1.10E-188 |
| Q14738-1   | PP2A B subunit isoform B56-delta                                                                             | PPP2R5D   | 0.84     | 0.77     | 1.06     | 0.94     | 0.89       | 0.15 | 8        | 18         | 1.51E-187 |
| Q496C9     | D-tyrosyl-tRNA(Tyr) deacylase                                                                                | DTD1      | 1.00     |          | 0.78     | 1.28     | 0.89       | 0.16 | 2        | 7.7        | 6.40E-76  |
| Q13620-2   | Cullin-4B                                                                                                    | CUL4B     | 0.71     | 0.93     | 1.03     | 0.97     | 0.89       | 0.16 | 11       | 13         | 3.58E-84  |
| A8K1V0     | cDNA FLJ77529, highly similar to Homo sapiens R3H domain containing 1 (R3HDM1), mRNA                         | KIAA0029  | 0.67     | 1.01     | 0.99     | 1.01     | 0.89       | 0.19 | 2        | 2.4        | 9.74E-20  |
| P51114-1   | Fragile X mental retardation syndrome-related protein 1                                                      | FXR1      | 1.05     | 0.96     | 0.66     | 1.52     | 0.89       | 0.20 | 9        | 25         | 2.36E-94  |
| Q9BVI4     | NOC4-like protein                                                                                            | NOC4L     | 1.04     |          | 0.74     | 1.35     | 0.89       | 0.21 | 7        | 23         | 3.14E-83  |
| P08397-1   | Hydroxymethylbilane synthase                                                                                 | HMBS      | 1.05     |          | 0.73     | 1.37     | 0.89       | 0.23 | 5        | 22         | 6.63E-193 |
| B4DGM9     | cDNA FLJ56343, highly similar to Torsin A                                                                    | hCG_30595 | 0.72     |          | 1.06     | 0.94     | 0.89       | 0.24 | 3        | 10         | 3.40E-09  |
| A8MW61     | Putative uncharacterized protein PLRG1                                                                       | PLRG1     | 1.06     |          | 0.72     | 1.39     | 0.89       | 0.24 | 4        | 15         | 2.06E-10  |
| O60271     | Cancer/testis antigen 89                                                                                     | HLC6      | 0.56     | 0.94     | 1.17     | 0.85     | 0.89       | 0.31 | 9        | 9.9        | 1.71E-72  |

| UniProt ID | Protein_Name                                                   | Gene Name | F1 (L/H) | F2 (L/H) | R1 (H/L) | R1 (L/H) | Mean (T/U) | S.D. | Pep. No. | %Seq. Cov. | PEP       |
|------------|----------------------------------------------------------------|-----------|----------|----------|----------|----------|------------|------|----------|------------|-----------|
| -1         |                                                                |           |          |          |          |          |            |      |          |            |           |
| P67936-1   | TM30p1                                                         | TPM4      | 0.49     | 0.54     | 1.64     | 0.61     | 0.89       | 0.65 | 25       | 67         | 2.43E-245 |
| P06280     | Alpha-D-galactosidase A                                        | GLA       |          |          | 0.89     | 1.12     | 0.89       |      | 2        | 4.4        | 1.35E-22  |
| Q13371     | Phosducin-like protein                                         | PDCL      |          |          | 0.89     | 1.12     | 0.89       |      | 2        | 8.3        | 3.64E-15  |
| Q8BMH2     | Putative uncharacterized protein RNPEP                         | RNPEP     |          |          | 0.89     | 1.12     | 0.89       |      | 3        | 8.2        | 5.12E-31  |
| Q9BSC4     | Nucleolar protein 10                                           | NOL10     |          |          | 0.89     | 1.12     | 0.89       |      | 5        | 10         | 4.08E-08  |
| P56282     | DNA polymerase epsilon subunit 2                               | DPE2      | 0.89     |          |          |          | 0.89       |      | 2        | 7          | 6.88E-08  |
| Q9BXX5-1   | Bcl-2-like protein 13                                          | BCL2L13   | 0.89     |          |          |          | 0.89       |      | 2        | 5.2        | 1.83E-16  |
| Q96CN9     | Golgi coiled-coil protein 1                                    | GCC1      |          | 0.89     |          |          | 0.89       |      | 2        | 2.5        | 1.48E-03  |
| Q5TBT2     | 230 kDa bullous pemphigoid antigen                             | BPAG1     | 0.89     |          |          |          | 0.89       |      | 2        | 0.3        | 1.81E-02  |
| Q5JU85-2   | IQ motif and SEC7 domain-containing protein 2                  | IQSEC2    |          | 0.89     |          |          | 0.89       |      | 2        | 1.1        | 1.63E-02  |
| Q8N2M8-1   | Splicing factor, arginine/serine-rich 16                       | SFRS16    | 0.89     |          |          |          | 0.89       |      | 3        | 10         | 1.18E-23  |
| Q8TDH9-1   | Protein Muted homolog                                          | MUTE D    | 0.89     |          |          |          | 0.89       |      | 3        | 16         | 7.94E-07  |
| P0CB38     | Polyadenylate-binding protein 4-like                           | PABPC4L   |          | 0.89     |          |          | 0.89       |      | 3        | 4.9        | 2.29E-16  |
| Q02338     | 3-hydroxybutyrate dehydrogenase                                | BDH       | 0.89     |          |          |          | 0.89       |      | 4        | 14         | 2.47E-32  |
| Q96FV2     | Secernin-2                                                     | SCRN2     | 0.89     |          |          |          | 0.89       |      | 5        | 22         | 6.59E-26  |
| P50238     | Cysteine-rich heart protein                                    | CRIP      | 0.89     |          |          |          | 0.89       |      | 5        | 52         | 1.50E-19  |
| Q9BWU0     | Human lung cancer oncogene 3 protein                           | HLC3      | 0.87     | 0.87     | 0.94     | 1.06     | 0.89       | 0.04 | 9        | 17         | 3.51E-52  |
| Q92615     | La ribonucleoprotein domain family member 4B                   | KIAA0217  | 0.96     | 0.82     | 0.90     | 1.11     | 0.89       | 0.07 | 5        | 9.3        | 3.43E-82  |
| Q8WW12-1   | PEST proteolytic signal-containing nuclear protein             | PCNP      | 0.78     | 0.94     | 0.96     | 1.04     | 0.89       | 0.10 | 9        | 55         | 1.50E-67  |
| Q15052-1   | Alpha-Pix                                                      | ARHG EF6  | 0.88     | 0.79     | 1.01     | 0.99     | 0.89       | 0.11 | 7        | 13         | 2.19E-25  |
| Q6FI81-1   | Anamorsin                                                      | CIAPIN1   | 0.94     | 0.98     | 0.76     | 1.32     | 0.89       | 0.12 | 9        | 29         | 1.86E-44  |
| P53597     | Succinyl-CoA ligase [GDP-forming] subunit alpha, mitochondrial | SUCLG1    | 0.84     | 0.81     | 1.03     | 0.97     | 0.89       | 0.12 | 3        | 12         | 2.25E-28  |
| Q9NYZ3     | G2 and S phase-expressed protein 1                             | GTSE1     | 0.70     | 1.02     | 0.96     | 1.04     | 0.89       | 0.17 | 3        | 5.8        | 4.11E-15  |
| Q96LR5     | UbcH8                                                          | UBCH8     | 0.99     | 1.02     | 0.67     | 1.49     | 0.89       | 0.19 | 3        | 22         | 4.46E-82  |



| UniProt ID | Protein_Name                                                                | Gene Name | F1 (L/H) | F2 (L/H) | R1 (H/L) | R1 (L/H) | Mean (T/U) | S.D. | Pep. No. | %Seq. Cov. | PEP       |
|------------|-----------------------------------------------------------------------------|-----------|----------|----------|----------|----------|------------|------|----------|------------|-----------|
| Q8N335     | Glycerol-3-phosphate dehydrogenase 1-like protein                           | GPD1L     | 0.74     | 0.78     | 1.16     | 0.86     | 0.89       | 0.23 | 3        | 8.8        | 3.56E-20  |
| P33176     | Conventional kinesin heavy chain                                            | KIF5B     | 0.72     | 0.80     | 1.16     | 0.86     | 0.89       | 0.23 | 40       | 50         | 0.00E+00  |
| Q05D32-1   | CTD small phosphatase-like protein 2                                        | CTDSP L2  | 0.64     | 0.89     | 1.15     | 0.87     | 0.89       | 0.26 | 4        | 6.9        | 3.13E-61  |
| Q92734     | Protein TFG                                                                 | TFG       | 0.84     | 0.91     | 0.93     | 1.08     | 0.89       | 0.05 | 3        | 11         | 5.89E-33  |
| Q9GZS3     | Meiotic recombination REC14 protein homolog                                 | WDR61     | 0.98     | 0.87     | 0.83     | 1.20     | 0.89       | 0.08 | 8        | 40         | 1.98E-98  |
| P63173     | 60S ribosomal protein L38                                                   | RPL38     | 0.89     | 0.98     | 0.81     | 1.23     | 0.89       | 0.09 | 6        | 50         | 2.62E-50  |
| Q9GZT8-1   | Amyotrophic lateral sclerosis 2 chromosomal region candidate gene 1 protein | ALS2C R1  | 0.81     | 0.83     | 1.04     | 0.96     | 0.89       | 0.13 | 6        | 22         | 2.83E-49  |
| Q9Y2R9     | 28S ribosomal protein S7, mitochondrial                                     | MRPS7     | 0.71     | 0.85     | 1.12     | 0.89     | 0.89       | 0.21 | 6        | 30         | 1.31E-17  |
| P30626     | 22 kDa protein                                                              | SRI       | 1.11     | 0.90     | 0.67     | 1.49     | 0.89       | 0.22 | 7        | 43         | 1.27E-36  |
| Q9BXW9-1   | Fanconi anemia group D2 protein                                             | FACD      | 1.03     | 1.12     | 0.53     | 1.89     | 0.89       | 0.32 | 6        | 4.9        | 1.87E-60  |
| Q15417     | Calponin, acidic isoform                                                    | CNN3      |          | 0.87     | 0.92     | 1.09     | 0.90       | 0.04 | 3        | 12         | 6.83E-24  |
| Q14241     | Elongin 110 kDa subunit                                                     | MSTP0 59  | 0.93     |          | 0.86     | 1.16     | 0.90       | 0.05 | 5        | 6.9        | 3.57E-23  |
| Q9H2M9-1   | Rab3 GTPase-activating protein 150 kDa subunit                              | KIAA0 839 | 0.83     | 0.96     |          |          | 0.90       | 0.09 | 3        | 2.5        | 1.90E-10  |
| P22670     | Enhancer factor C                                                           | RFX1      | 1.15     | 0.64     |          |          | 0.90       | 0.36 | 2        | 2.9        | 7.69E-04  |
| Q8N8S7-1   | Protein enabled homolog                                                     | ENAH      | 0.60     |          | 1.19     | 0.84     | 0.90       | 0.42 | 2        | 4          | 7.67E-08  |
| Q96C90     | Phospholipase C-beta-3 neighbouring gene protein                            | PLCB3 N   | 1.20     |          | 0.59     | 1.69     | 0.90       | 0.43 | 2        | 19         | 5.34E-114 |
| Q86WR0     | Coiled-coil domain-containing protein 25                                    | CCDC2 5   | 0.89     | 0.91     | 0.89     | 1.12     | 0.90       | 0.01 | 4        | 20         | 1.96E-15  |
| Q9HC52     | Chromobox protein homolog 8                                                 | CBX8      | 0.91     | 0.85     | 0.93     | 1.08     | 0.90       | 0.04 | 2        | 5.9        | 7.21E-05  |
| Q05639     | Elongation factor 1-alpha 2                                                 | EEF1A 2   | 0.84     | 0.92     | 0.93     | 1.08     | 0.90       | 0.05 | 14       | 32         | 1.68E-134 |
| Q15648-1   | Activator-recruited cofactor 205 kDa component                              | ARC20 5   | 0.84     | 0.93     | 0.92     | 1.09     | 0.90       | 0.05 | 4        | 3.2        | 1.04E-22  |
| P42766     | 60S ribosomal protein L35                                                   | RPL35     | 0.92     | 0.95     | 0.82     | 1.22     | 0.90       | 0.07 | 6        | 30         | 1.26E-81  |
| Q8WU90     | DRG family-regulatory protein 1                                             | DFRP1     | 0.96     | 0.91     | 0.82     | 1.22     | 0.90       | 0.07 | 7        | 17         | 3.73E-43  |
| Q13951-2   | Core-binding factor subunit beta, isoform 2                                 | PEBP2b    | 0.87     | 0.84     | 0.98     | 1.02     | 0.90       | 0.07 | 7        | 41         | 4.33E-151 |
| Q14694     | Deubiquitinating                                                            | KIAA0     | 0.88     | 0.98     | 0.83     | 1.20     | 0.90       | 0.08 | 8        | 17         | 4.33E-52  |

| UniProt ID | Protein_Name                                                                                                  | Gene Name | F1 (L/H) | F2 (L/H) | R1 (H/L) | R1 (L/H) | Mean (T/U) | S.D. | Pep. No. | %Seq. Cov. | PEP       |
|------------|---------------------------------------------------------------------------------------------------------------|-----------|----------|----------|----------|----------|------------|------|----------|------------|-----------|
|            | enzyme 10                                                                                                     | 190       |          |          |          |          |            |      |          |            |           |
| P42704     | 130 kDa leucine-rich protein                                                                                  | LRP130    | 0.84     | 0.86     | 0.99     | 1.01     | 0.90       | 0.08 | 67       | 56         | 0.00E+00  |
| Q6UX04-1   | Antigen NY-CO-10                                                                                              | CWC27     | 0.99     | 0.86     | 0.84     | 1.19     | 0.90       | 0.08 | 4        | 14         | 6.62E-60  |
| Q9UN37     | Protein SKD2                                                                                                  | VPS4      | 1.00     | 0.92     | 0.77     | 1.30     | 0.90       | 0.12 | 6        | 16         | 1.27E-11  |
| P08708     | 40S ribosomal protein S17                                                                                     | RPS17     | 1.06     | 0.99     | 0.64     | 1.56     | 0.90       | 0.23 | 8        | 56         | 1.26E-171 |
| Q6NYC8-1   | Phostensin                                                                                                    | HKMT1098  | 0.85     | 0.67     | 1.17     | 0.85     | 0.90       | 0.25 | 12       | 24         | 3.87E-45  |
| Q6P1J9     | Cell division cycle protein 73 homolog                                                                        | C1orf28   | 0.92     | 0.97     | 0.80     | 1.25     | 0.90       | 0.09 | 14       | 28         | 1.81E-57  |
| Q15061     | WD repeat-containing protein 43                                                                               | KIAA0007  | 0.98     | 0.93     | 0.78     | 1.28     | 0.90       | 0.10 | 6        | 8          | 4.68E-12  |
| Q86U38     | Pumilio domain-containing protein C14orf21                                                                    | C14orf21  | 0.89     | 0.77     | 1.03     | 0.97     | 0.90       | 0.13 | 5        | 12         | 6.76E-131 |
| P15498     | Proto-oncogene vav                                                                                            | VAV       | 0.80     | 0.78     | 1.11     | 0.90     | 0.90       | 0.19 | 25       | 35         | 1.34E-246 |
| Q9Y3D9     | 28S ribosomal protein S23, mitochondrial                                                                      | CGI-138   | 0.82     | 0.76     | 1.11     | 0.90     | 0.90       | 0.19 | 8        | 50         | 6.52E-40  |
| Q9NQY0-1   | Bridging integrator 3                                                                                         | BIN3      |          | 0.95     | 0.85     | 1.18     | 0.90       | 0.07 | 2        | 8.7        | 2.65E-05  |
| P19525     | Eukaryotic translation initiation factor 2-alpha kinase 2                                                     | EIF2AK2   | 0.85     | 0.95     |          |          | 0.90       | 0.07 | 2        | 3.8        | 1.80E-27  |
| Q96Q11-1   | Mitochondrial tRNA nucleotidyl transferase, CCA-adding                                                        | CGI-47    | 0.82     | 0.96     | 0.92     | 1.09     | 0.90       | 0.07 | 3        | 5.8        | 4.99E-53  |
| Q13185     | Chromobox protein homolog 3                                                                                   | CBX3      | 0.92     | 0.96     | 0.82     | 1.22     | 0.90       | 0.07 | 14       | 65         | 0.00E+00  |
| Q53ET0     | CREB-regulated transcription coactivator 2                                                                    | CRTC2     |          | 0.82     | 0.98     | 1.02     | 0.90       | 0.11 | 4        | 9.7        | 1.07E-04  |
| O95817     | BAG family molecular chaperone regulator 3                                                                    | BAG3      |          | 0.82     | 0.98     | 1.02     | 0.90       | 0.11 | 6        | 16         | 1.25E-19  |
| B3KNP2     | cDNA FLJ30079 fis, clone BGGI12000544, highly similar to Snurportin-1 (RNA U transporter 1)                   | SNUPN     |          | 0.90     | 0.90     | 1.11     | 0.90       | 0.00 | 3        | 7.7        | 1.33E-06  |
| Q92520     | Protein FAM3C                                                                                                 | FAM3C     | 0.90     | 0.90     |          |          | 0.90       | 0.00 | 3        | 18         | 1.66E-29  |
| B3KS98     | cDNA FLJ35809 fis, clone TESTI2006016, highly similar to Eukaryotic translation initiation factor 3 subunit 3 | EIF3S3    | 0.88     | 0.89     | 0.93     | 1.08     | 0.90       | 0.03 | 14       | 48         | 3.00E-161 |
| P78318     | B-cell signal transduction molecule alpha 4                                                                   | IBP1      | 0.87     | 0.92     | 0.91     | 1.10     | 0.90       | 0.03 | 6        | 18         | 1.05E-47  |
| O00429     | Dnm1p/Vps1p-like                                                                                              | DLP1      | 0.88     | 0.92     |          |          | 0.90       | 0.03 | 25       | 46         | 0.00E+00  |

| UniProt ID | Protein_Name                                               | Gene Name | F1 (L/H) | F2 (L/H) | R1 (H/L) | R1 (L/H) | Mean (T/U) | S.D. | Pep. No. | %Seq. Cov. | PEP       |
|------------|------------------------------------------------------------|-----------|----------|----------|----------|----------|------------|------|----------|------------|-----------|
| -3         | protein                                                    |           |          |          |          |          |            |      |          |            |           |
| C9JKP3     | Putative uncharacterized protein YAF2                      | YAF2      | 0.83     | 0.92     | 0.95     | 1.05     | 0.90       | 0.06 | 3        | 23         | 2.00E-35  |
| Q9BWF3-1   | Lark homolog                                               | RBM4      | 0.86     | 0.85     | 0.99     | 1.01     | 0.90       | 0.08 | 18       | 60         | 1.19E-163 |
| Q9BQ39     | ATP-dependent RNA helicase DDX50                           | DDX50     | 0.86     | 0.84     | 1.00     | 1.00     | 0.90       | 0.09 | 14       | 22         | 2.11E-81  |
| P48147     | Post-proline cleaving enzyme                               | PEP       | 0.83     | 0.87     | 1.00     | 1.00     | 0.90       | 0.09 | 11       | 22         | 1.34E-175 |
| P18887     | DNA repair protein XRCC1                                   | XRCC1     | 0.82     | 0.87     | 1.01     | 0.99     | 0.90       | 0.10 | 11       | 22         | 8.53E-49  |
| Q9BW D1    | Acetyl-CoA acetyltransferase, cytosolic                    | ACAT2     | 0.92     | 0.79     | 0.99     | 1.01     | 0.90       | 0.10 | 13       | 47         | 1.75E-139 |
| P41240     | C-Src kinase                                               | CSK       | 0.83     | 0.85     | 1.02     | 0.98     | 0.90       | 0.10 | 12       | 32         | 6.94E-42  |
| Q6PJG6-1   | HEAT repeat-containing protein C7orf27                     | C7orf27   | 0.98     | 0.95     | 0.77     | 1.30     | 0.90       | 0.11 | 17       | 26         | 3.36E-216 |
| Q92888-3   | 115 kDa guanine nucleotide exchange factor                 | ARHG EF1  | 0.91     | 0.77     | 1.02     | 0.98     | 0.90       | 0.13 | 19       | 26         | 2.93E-104 |
| Q92576-1   | PHD finger protein 3                                       | KIAA0244  | 0.99     |          | 0.81     | 1.23     | 0.90       | 0.13 | 3        | 2.2        | 3.00E-27  |
| Q14919-2   | Dr1-associated corepressor                                 | DRAP1     | 0.99     | 0.81     |          |          | 0.90       | 0.13 | 3        | 15         | 1.98E-25  |
| O75694-1   | 155 kDa nucleoporin                                        | KIAA0791  | 1.05     | 0.86     | 0.79     | 1.27     | 0.90       | 0.13 | 11       | 11         | 2.77E-133 |
| Q5VT52-1   | Regulation of nuclear pre-mRNA domain-containing protein 2 | HSPC099   | 0.93     | 1.02     | 0.75     | 1.33     | 0.90       | 0.14 | 13       | 15         | 4.08E-101 |
| Q96EV2-1   | Proline-rich protein 8                                     | PRR8      | 0.80     | 0.80     | 1.10     | 0.91     | 0.90       | 0.17 | 4        | 5.5        | 3.80E-19  |
| P38117-1   | Electron transfer flavoprotein subunit beta                | ETFB      | 0.79     | 0.80     | 1.11     | 0.90     | 0.90       | 0.18 | 12       | 48         | 8.69E-130 |
| Q96A65     | Exocyst complex component 4                                | EXOC4     | 0.67     | 0.95     | 1.08     | 0.93     | 0.90       | 0.21 | 7        | 9.8        | 9.43E-123 |
| Q6PK04     | Coiled-coil domain-containing protein 137                  | CCDC137   | 0.70     | 0.86     | 1.14     | 0.88     | 0.90       | 0.22 | 3        | 12         | 1.91E-04  |
| Q01082-1   | Beta-II spectrin                                           | SPTB2     | 0.76     | 0.77     | 1.17     | 0.85     | 0.90       | 0.23 | ##       | 64         | 0.00E+00  |
| Q96BN8     | Protein FAM105B                                            | FAM105B   | 0.67     | 0.89     | 1.14     | 0.88     | 0.90       | 0.24 | 4        | 11         | 6.84E-11  |
| Q9BVW5     | TIMELESS-interacting protein                               | TIPIN     | 0.76     | 1.18     | 0.76     | 1.32     | 0.90       | 0.24 | 2        | 6.6        | 3.18E-22  |
| Q8TC07-1   | GTPase-activating protein RAB7                             | TBC1D15   | 0.74     | 0.75     | 1.21     | 0.83     | 0.90       | 0.27 | 5        | 7.9        | 1.54E-51  |
| O43156     | Uncharacterized protein KIAA0406                           | KIAA0406  | 1.09     |          | 0.71     | 1.41     | 0.90       | 0.27 | 4        | 6.5        | 3.25E-77  |
| C9JJ71     | Putative uncharacterized                                   | QTRTD1    | 1.10     |          | 0.70     | 1.43     | 0.90       | 0.28 | 3        | 13         | 3.12E-87  |

| UniProt ID | Protein_Name                                                                                 | Gene Name | F1 (L/H) | F2 (L/H) | R1 (H/L) | R1 (L/H) | Mean (T/U) | S.D. | Pep. No. | %Seq. Cov. | PEP       |
|------------|----------------------------------------------------------------------------------------------|-----------|----------|----------|----------|----------|------------|------|----------|------------|-----------|
|            | protein QTRTD1                                                                               |           |          |          |          |          |            |      |          |            |           |
| P09622     | Dihydrolipoamide dehydrogenase                                                               | DLD       | 0.74     | 0.68     | 1.28     | 0.78     | 0.90       | 0.33 | 11       | 26         | 2.09E-96  |
| O14964-1   | Hepatocyte growth factor-regulated tyrosine kinase substrate                                 | HGS       | 0.63     | 0.78     | 1.29     | 0.78     | 0.90       | 0.35 | 9        | 11         | 1.13E-39  |
| P04350     | Tubulin 5 beta                                                                               | TUBB4     | 0.72     | 0.63     | 1.35     | 0.74     | 0.90       | 0.39 | 24       | 74         | 0.00E+00  |
| Q13576-1   | Ras GTPase-activating-like protein IQGAP2                                                    | IQGAP2    | 0.68     | 0.65     | 1.37     | 0.73     | 0.90       | 0.41 | 37       | 34         | 8.87E-230 |
| B3KST9     | cDNA FLJ36938 fis, clone BRACE2005434, highly similar to Histone RNA hairpin-binding protein | SLBP      |          |          | 0.90     | 1.11     | 0.90       |      | 3        | 12         | 2.93E-09  |
| P51151     | Ras-related protein Rab-9A                                                                   | RAB9      | 0.90     |          |          |          | 0.90       |      | 2        | 10         | 3.17E-26  |
| Q7Z3D6-2   | UPF0317 protein C14orf159, mitochondrial                                                     | C14orf159 | 0.90     |          |          |          | 0.90       |      | 2        | 3.7        | 7.91E-04  |
| Q86SQ4-3   | Developmentally regulated G-protein-coupled receptor                                         | DREG      | 0.90     |          |          |          | 0.90       |      | 2        | 2.6        | 2.22E-02  |
| B4DGT3     | Ubiquitin carboxyl-terminal hydrolase                                                        | KIAA0891  | 0.90     |          |          |          | 0.90       |      | 2        | 3.3        | 6.79E-38  |
| Q9BQP7     | Uncharacterized protein C20orf72                                                             | C20orf72  | 0.90     |          |          |          | 0.90       |      | 3        | 15         | 1.34E-09  |
| O43427-1   | Acidic fibroblast growth factor intracellular-binding protein                                | FIBP      | 0.90     |          |          |          | 0.90       |      | 3        | 10         | 2.64E-13  |
| Q9BZE1     | 39S ribosomal protein L2, mitochondrial                                                      | HSPC235   |          | 0.90     |          |          | 0.90       |      | 3        | 7.6        | 1.09E-19  |
| Q93008-2   | Deubiquitinating enzyme FAF-X                                                                | DFFRX     | 0.90     |          |          |          | 0.90       |      | 3        | 1.6        | 1.29E-17  |
| P54252-1   | Ataxin-3                                                                                     | ATX3      | 0.90     |          |          |          | 0.90       |      | 4        | 12         | 5.71E-17  |
| Q04446     | 1,4-alpha-glucan-branching enzyme                                                            | GBE1      | 0.90     |          |          |          | 0.90       |      | 5        | 9          | 4.49E-31  |
| Q9UBW5-1   | Breast cancer-associated protein 1                                                           | BIN2      | 0.90     |          |          |          | 0.90       |      | 6        | 17         | 8.21E-56  |
| Q9BY43     | Charged multivesicular body protein 4a                                                       | C14orf123 | 0.90     |          |          |          | 0.90       |      | 6        | 31         | 2.83E-54  |
| Q8IWZ8-1   | RNA-binding protein RBP                                                                      | SF4       | 0.89     | 0.95     | 0.87     | 1.15     | 0.90       | 0.04 | 2        | 6.2        | 9.08E-33  |
| O00273-1   | DNA fragmentation factor 45 kDa subunit                                                      | DFF1      | 0.96     | 0.86     | 0.89     | 1.12     | 0.90       | 0.05 | 7        | 26         | 9.36E-51  |
| B3KNW1     | cDNA FLJ30560 fis, clone BRAWH2004217,                                                       | AP1G1     | 0.89     | 0.85     | 0.97     | 1.03     | 0.90       | 0.06 | 7        | 10         | 4.07E-50  |

| UniProt ID | Protein_Name                                                                     | Gene Name    | F1 (L/H) | F2 (L/H) | R1 (H/L) | R1 (L/H) | Mean (T/U) | S.D. | Pep. No. | %Seq. Cov. | PEP       |
|------------|----------------------------------------------------------------------------------|--------------|----------|----------|----------|----------|------------|------|----------|------------|-----------|
|            | highly similar to AP-1 complex subunit gamma-1                                   |              |          |          |          |          |            |      |          |            |           |
| Q5TH30     | NDRG family member 3                                                             | hCG_1785125  | 0.83     | 0.93     | 0.95     | 1.05     | 0.90       | 0.06 | 3        | 11         | 9.66E-15  |
| Q9BVP2-1   | E2-induced gene 3 protein                                                        | E2IG3        | 0.83     | 0.99     | 0.89     | 1.12     | 0.90       | 0.08 | 8        | 19         | 1.19E-103 |
| Q15027     | Arf-GAP with coiled-coil, ANK repeat and PH domain-containing protein 1          | ACAP1        | 0.97     | 0.95     | 0.79     | 1.27     | 0.90       | 0.10 | 7        | 16         | 2.85E-58  |
| Q16181-1   | CDC10 protein homolog                                                            | CDC10        | 0.84     | 0.83     | 1.04     | 0.96     | 0.90       | 0.12 | 17       | 42         | 2.36E-211 |
| B4DZW0     | cDNA FLJ58821, highly similar to Septin-6                                        | KIAA0128     | 0.85     | 0.82     | 1.04     | 0.96     | 0.90       | 0.12 | 15       | 43         | 0.00E+00  |
| P32969     | 60S ribosomal protein L9                                                         | OK/SW-cl.103 | 1.01     | 0.93     | 0.77     | 1.30     | 0.90       | 0.12 | 9        | 62         | 3.88E-224 |
| P62491     | Ras-related protein Rab-11A                                                      | RAB11        | 0.92     | 0.77     | 1.02     | 0.98     | 0.90       | 0.13 | 20       | 68         | 3.37E-128 |
| A6NHR9-1   | Structural maintenance of chromosomes flexible hinge domain-containing protein 1 | KIAA0650     | 0.91     | 1.03     | 0.77     | 1.30     | 0.90       | 0.13 | 10       | 6.8        | 2.81E-89  |
| A8KAG1     | G patch domain-containing protein 4                                              | GPATC4       | 0.87     | 0.77     | 1.07     | 0.93     | 0.90       | 0.15 | 2        | 6.1        | 9.21E-04  |
| Q16643-2   | Developmentally-regulated brain protein                                          | D0S117E      | 0.97     | 1.02     | 0.72     | 1.39     | 0.90       | 0.16 | 42       | 59         | 0.00E+00  |
| Q9C0K0-1   | B-cell CLL/lymphoma 11B                                                          | BCL11B       | 0.81     | 0.80     | 1.10     | 0.91     | 0.90       | 0.17 | 12       | 19         | 1.01E-34  |
| Q9GZU8     | NEFA-interacting nuclear protein NIP30                                           | C16orf94     | 0.97     | 1.10     | 0.64     | 1.56     | 0.90       | 0.24 | 4        | 20         | 3.98E-52  |
| P61956     | HSMT3                                                                            | SMT3B        | 0.91     | 0.90     |          |          | 0.91       | 0.01 | 3        | 27         | 7.96E-56  |
| O14967     | Calmegin                                                                         | CLGN         |          | 0.81     | 1.00     | 1.00     | 0.91       | 0.13 | 4        | 5.1        | 1.80E-05  |
| O43795-1   | MYH-1c                                                                           | MYO1B        | 1.34     |          | 0.47     | 2.13     | 0.91       | 0.62 | 3        | 4.2        | 1.38E-12  |
| Q9NV88     | Integrator complex subunit 9                                                     | INTS9        | 1.46     |          | 0.35     | 2.86     | 0.91       | 0.78 | 3        | 5.5        | 2.94E-21  |
| P39019     | 40S ribosomal protein S19                                                        | RPS19        | 0.94     | 0.94     | 0.84     | 1.19     | 0.91       | 0.06 | 13       | 64         | 1.10E-134 |
| Q8NI27-1   | hTREX120                                                                         | CXorf3       | 0.84     | 0.96     | 0.92     | 1.09     | 0.91       | 0.06 | 16       | 14         | 7.05E-71  |
| P48426     | 1-phosphatidylinositol-5-phosphate 4-kinase 2-alpha                              | PIP4K2A      | 0.83     | 0.93     | 0.96     | 1.04     | 0.91       | 0.07 | 3        | 10         | 1.43E-41  |
| Q86UP2-1   | CG-1 antigen                                                                     | CG1          | 0.83     | 0.97     | 0.92     | 1.09     | 0.91       | 0.07 | 37       | 32         | 0.00E+00  |
| P17844     | DEAD box protein 5                                                               | DDX5         | 0.85     | 0.87     | 1.00     | 1.00     | 0.91       | 0.08 | 38       | 58         | 0.00E+00  |
| Q0VDC6     | FKBP1A protein                                                                   | FKBP1A       | 0.83     | 0.88     | 1.01     | 0.99     | 0.91       | 0.09 | 6        | 31         | 2.77E-121 |
| Q03164     | ALL-1                                                                            | ALL1         | 0.83     | 1.01     | 0.88     | 1.14     | 0.91       | 0.09 | 4        | 1.4        | 6.02E-11  |

| UniProt ID | Protein_Name                                                             | Gene Name      | F1 (L/H) | F2 (L/H) | R1 (H/L) | R1 (L/H) | Mean (T/U) | S.D. | Pep. No. | %Seq. Cov. | PEP       |
|------------|--------------------------------------------------------------------------|----------------|----------|----------|----------|----------|------------|------|----------|------------|-----------|
| -1         |                                                                          |                |          |          |          |          |            |      |          |            |           |
| A8K3B4     | cDNA FLJ77653                                                            | DKFZp686G04235 | 0.91     | 1.01     | 0.80     | 1.25     | 0.91       | 0.11 | 3        | 7.5        | 2.89E-63  |
| B4DRT2     | cDNA FLJ54536, highly similar to Mitochondrial 28S ribosomal protein S27 | KIAA0264       | 0.85     | 1.03     | 0.84     | 1.19     | 0.91       | 0.11 | 5        | 15         | 2.08E-56  |
| O00299     | Chloride channel ABP                                                     | CLIC1          | 0.81     | 0.86     | 1.05     | 0.95     | 0.91       | 0.13 | 13       | 66         | 1.38E-289 |
| Q9H1B7     | Enhanced at puberty protein 1                                            | C14orf4        | 0.94     | 0.75     | 1.03     | 0.97     | 0.91       | 0.14 | 7        | 12         | 3.06E-47  |
| Q8N684-1   | Cleavage and polyadenylation specificity factor 59 kDa subunit           | CPSF7          | 0.78     | 0.87     | 1.07     | 0.93     | 0.91       | 0.15 | 7        | 18         | 1.13E-73  |
| Q8IW35-1   | Centrosomal protein of 97 kDa                                            | CEP97          | 0.74     | 0.74     | 1.24     | 0.81     | 0.91       | 0.29 | 8        | 9.9        | 3.53E-67  |
| Q16775-1   | Glyoxalase II                                                            | GLO2           | 0.65     | 0.65     | 1.42     | 0.70     | 0.91       | 0.44 | 9        | 34         | 4.43E-44  |
| P40937     | Activator 1 36 kDa subunit                                               | RFC5           | 0.89     | 0.93     | 0.90     | 1.11     | 0.91       | 0.02 | 11       | 40         | 6.18E-127 |
| Q9UQR0-1   | Sex comb on midleg-like protein 2                                        | SCML2          | 0.88     | 0.92     | 0.92     | 1.09     | 0.91       | 0.02 | 4        | 8          | 3.23E-17  |
| Q9HD26-1   | CFTR-associated ligand                                                   | CAL            | 0.87     | 0.93     | 0.92     | 1.09     | 0.91       | 0.03 | 3        | 6.5        | 2.27E-07  |
| O14980     | Chromosome region maintenance 1 protein homolog                          | CRM1           | 0.96     | 0.87     | 0.89     | 1.12     | 0.91       | 0.05 | 21       | 27         | 3.81E-247 |
| Q8WWY3-1   | Pre-mRNA-processing factor 31                                            | PRP31          | 0.96     | 0.91     | 0.85     | 1.18     | 0.91       | 0.06 | 10       | 23         | 2.90E-111 |
| Q9NW64-1   | Pre-mRNA-splicing factor RBM22                                           | 199G4          | 0.85     | 1.02     | 0.85     | 1.18     | 0.91       | 0.10 | 3        | 4.3        | 1.74E-08  |
| Q68D10-1   | Protein KU002155                                                         | SPTY2D1        | 0.84     | 1.03     | 0.85     | 1.18     | 0.91       | 0.11 | 4        | 6.3        | 6.89E-06  |
| Q7Z460-1   | CLIP-associating protein 1                                               | CLASP1         | 0.80     | 0.84     | 1.08     | 0.93     | 0.91       | 0.15 | 11       | 12         | 2.16E-139 |
| Q92665     | 28S ribosomal protein S31, mitochondrial                                 | IMOGN38        | 0.89     | 0.75     | 1.08     | 0.93     | 0.91       | 0.17 | 10       | 33         | 2.68E-86  |
| P30622-3   | CAP-Gly domain-containing linker protein 1                               | CLIP1          | 0.71     | 0.86     | 1.16     | 0.86     | 0.91       | 0.23 | 8        | 6.3        | 1.38E-117 |
| P21283     | Vacuolar proton pump subunit C 1                                         | ATP6C          |          | 0.98     | 0.84     | 1.19     | 0.91       | 0.10 | 5        | 12         | 6.60E-08  |
| Q9UPS6     | Histone-lysine N-methyltransferase SETD1B                                | KIAA1076       |          | 0.82     | 1.00     | 1.00     | 0.91       | 0.13 | 2        | 2.7        | 1.47E-05  |
| P14854     | Cytochrome c oxidase subunit 6B1                                         | COX6B          | 0.67     |          | 1.15     | 0.87     | 0.91       | 0.34 | 4        | 48         | 3.33E-45  |
| Q9UKZ1     | UPF0760 protein C2orf29                                                  | C2orf29        |          | 0.91     | 0.91     | 1.10     | 0.91       | 0.00 | 3        | 11         | 1.35E-14  |
| Q6PJG2     | Uncharacterized protein C14orf43                                         | C14orf17       | 0.90     | 0.92     |          |          | 0.91       | 0.01 | 2        | 2.6        | 6.12E-15  |

| UniProt ID | Protein_Name                                                                        | Gene Name   | F1 (L/H) | F2 (L/H) | R1 (H/L) | R1 (L/H) | Mean (T/U) | S.D. | Pep. No. | %Seq. Cov. | PEP       |
|------------|-------------------------------------------------------------------------------------|-------------|----------|----------|----------|----------|------------|------|----------|------------|-----------|
| Q9Y4W6     | AFG3-like protein 2                                                                 | AFG3L2      | 0.94     | 0.89     | 0.90     | 1.11     | 0.91       | 0.03 | 9        | 12         | 6.87E-21  |
| P62753     | 40S ribosomal protein S6                                                            | OK/SW-cl.2  | 0.89     | 0.94     | 0.90     | 1.11     | 0.91       | 0.03 | 15       | 42         | 1.00E-206 |
| Q15056-1   | Eukaryotic translation initiation factor 4H                                         | EIF4H       | 0.94     | 0.89     | 0.90     | 1.11     | 0.91       | 0.03 | 20       | 66         | 9.89E-248 |
| Q32Q10     | RSU1 protein                                                                        | RSU1        |          | 0.89     | 0.93     | 1.08     | 0.91       | 0.03 | 10       | 49         | 7.31E-157 |
| A2ICT2     | Heat shock 70 kDa protein 4-like protein                                            | hCG_37382   | 0.95     | 0.92     | 0.86     | 1.16     | 0.91       | 0.05 | 17       | 26         | 2.10E-173 |
| Q9UNN5-1   | FAS-associated factor 1                                                             | CGI-03      | 0.86     | 0.95     | 0.92     | 1.09     | 0.91       | 0.05 | 8        | 13         | 2.97E-16  |
| P37198     | 62 kDa nucleoporin                                                                  | NUP62       | 0.96     | 0.87     | 0.90     | 1.11     | 0.91       | 0.05 | 5        | 15         | 8.72E-22  |
| P05556-1   | Fibronectin receptor subunit beta                                                   | FNRB        | 0.88     | 0.97     | 0.88     | 1.14     | 0.91       | 0.05 | 7        | 11         | 5.35E-38  |
| P46781     | 40S ribosomal protein S9                                                            | RPS9        | 0.89     | 0.97     | 0.87     | 1.15     | 0.91       | 0.05 | 16       | 52         | 6.30E-102 |
| P04075     | Fructose-bisphosphate aldolase A                                                    | ALDA        | 0.89     | 0.86     | 0.98     | 1.02     | 0.91       | 0.06 | 33       | 79         | 0.00E+00  |
| B1ALS2     | Protein tyrosine phosphatase, receptor type, C                                      | hCG_1811178 | 0.87     | 0.86     | 1.00     | 1.00     | 0.91       | 0.08 | 40       | 39         | 8.95E-193 |
| O75947-1   | ATP synthase subunit d, mitochondrial                                               | ATP5H       | 0.98     | 0.81     | 0.94     | 1.06     | 0.91       | 0.09 | 12       | 74         | 6.22E-127 |
| B4E0Y9     | cDNA FLJ54528, highly similar to Serine/threonine-protein kinase MST4 (EC 2.7.11.1) | MASK        | 0.82     | 0.90     | 1.01     | 0.99     | 0.91       | 0.10 | 9        | 29         | 7.78E-123 |
| B4DQJ1     | cDNA FLJ56825, highly similar to WD repeat protein 57                               | SNRNP40     | 1.03     | 0.84     | 0.86     | 1.16     | 0.91       | 0.10 | 11       | 27         | 9.53E-35  |
| Q00341     | High density lipoprotein-binding protein                                            | HDLBP       | 0.95     | 1.02     | 0.76     | 1.32     | 0.91       | 0.13 | 20       | 20         | 8.32E-175 |
| A0AVT1-1   | Monocyte protein 4                                                                  | MOP4        | 0.81     | 0.84     | 1.08     | 0.93     | 0.91       | 0.15 | 13       | 17         | 2.08E-33  |
| O14672     | CDw156                                                                              | ADAM10      |          | 0.77     | 1.05     | 0.95     | 0.91       | 0.20 | 3        | 4.1        | 2.56E-11  |
| Q01804-1   | HIV-1-induced protein HIN-1                                                         | HIN1        |          | 1.05     | 0.77     | 1.30     | 0.91       | 0.20 | 3        | 3.2        | 4.71E-14  |
| P51970     | Complex I-19kD                                                                      | NDUF A8     | 0.91     | 1.13     | 0.69     | 1.45     | 0.91       | 0.22 | 6        | 48         | 2.70E-62  |
| Q13907-2   | Isopentenyl pyrophosphate isomerase 1                                               | IDI1        | 1.11     | 0.95     | 0.67     | 1.49     | 0.91       | 0.22 | 5        | 26         | 2.17E-57  |
| Q9NX24     | H/ACA ribonucleoprotein complex subunit 2                                           | HSPC286     | 1.09     |          | 0.73     | 1.37     | 0.91       | 0.25 | 3        | 25         | 2.99E-102 |
| P14324     | Dimethylallyltranstransferase                                                       | FDPS        | 0.78     | 0.74     | 1.21     | 0.83     | 0.91       | 0.26 | 7        | 20         | 4.06E-28  |
| Q8TDZ2-1   | Molecule interacting with CasL protein 1                                            | MICAL       | 0.75     | 0.76     | 1.22     | 0.82     | 0.91       | 0.27 | 11       | 13         | 5.47E-92  |
| Q9H2U      | DEAH box protein 36                                                                 | DDX36       | 1.22     | 0.75     | 0.76     | 1.32     | 0.91       | 0.27 | 7        | 11         | 2.97E-59  |

| UniProt ID | Protein_Name                                                    | Gene Name   | F1 (L/H) | F2 (L/H) | R1 (H/L) | R1 (L/H) | Mean (T/U) | S.D. | Pep. No. | %Seq. Cov. | PEP       |
|------------|-----------------------------------------------------------------|-------------|----------|----------|----------|----------|------------|------|----------|------------|-----------|
| 1-1        |                                                                 |             |          |          |          |          |            |      |          |            |           |
| O43237     | Cytoplasmic dynein 1 light intermediate chain 2                 | DNCLI2      | 0.97     | 1.15     | 0.61     | 1.64     | 0.91       | 0.27 | 3        | 6.9        | 1.67E-13  |
| C4AMC7     | Protein FAM39DP                                                 | FAM39DP     |          |          | 0.91     | 1.10     | 0.91       |      | 2        | 6.7        | 1.86E-04  |
| Q9GZT9-1   | Egl nine homolog 1                                              | C1orf12     | 0.91     |          |          |          | 0.91       |      | 2        | 9.6        | 3.09E-07  |
| Q14997-1   | Proteasome activator complex subunit 4                          | KIAA0077    |          | 0.91     |          |          | 0.91       |      | 2        | 1.4        | 2.96E-02  |
| Q9NX76     | Chemokine-like factor superfamily member 6                      | CKLFSF6     | 0.91     |          |          |          | 0.91       |      | 2        | 9.3        | 2.06E-03  |
| Q96FS4     | GTPase-activating protein Spa-1                                 | SIPA1       | 0.91     |          |          |          | 0.91       |      | 2        | 1.2        | 7.48E-07  |
| Q96JB2-1   | Component of oligomeric Golgi complex 3                         | COG3        | 0.91     |          |          |          | 0.91       |      | 2        | 4          | 6.24E-11  |
| Q8IW45-2   | Carbohydrate kinase domain-containing protein                   | CARKD       | 0.91     |          |          |          | 0.91       |      | 2        | 9.2        | 7.32E-27  |
| C9K0J5     | Putative uncharacterized protein RAPH1                          | hCG_2043066 |          | 0.91     |          |          | 0.91       |      | 2        | 1.2        | 2.67E-02  |
| Q5VWQ0-1   | Round spermatid basic protein 1                                 | RSBN1       |          | 0.91     |          |          | 0.91       |      | 3        | 5.2        | 7.10E-14  |
| Q96BJ3-1   | Axin interaction partner and dorsalization antagonist           | AIDA        | 0.91     |          |          |          | 0.91       |      | 3        | 10         | 2.88E-07  |
| P30414     | Natural-killer cells cyclophilin-related protein                | NKTR        | 0.91     |          |          |          | 0.91       |      | 5        | 5.3        | 2.13E-12  |
| Q9BSL1     | E3 ubiquitin-protein ligase subunit KPC2                        | GBDR1       | 0.91     |          |          |          | 0.91       |      | 5        | 14         | 8.49E-11  |
| Q93052     | LIM domain-containing preferred translocation partner in lipoma | LPP         | 0.91     |          |          |          | 0.91       |      | 6        | 18         | 5.53E-13  |
| Q12996     | CF-1 77 kDa subunit                                             | CSTF3       | 0.81     | 0.91     | 1.01     | 0.99     | 0.91       | 0.10 | 4        | 7.7        | 4.60E-82  |
| Q3YEC7-1   | Partner of ARF                                                  | C9orf86     | 0.78     | 0.88     | 1.07     | 0.93     | 0.91       | 0.15 | 6        | 10         | 8.29E-58  |
| Q15050     | Ribosome biogenesis regulatory protein homolog                  | KIAA0112    | 1.07     | 0.96     | 0.70     | 1.43     | 0.91       | 0.19 | 7        | 24         | 1.67E-125 |
| P84098     | 60S ribosomal protein L19                                       | RPL19       | 0.88     | 0.93     | 0.93     | 1.08     | 0.91       | 0.03 | 14       | 41         | 2.57E-109 |
| Q86U86-1   | BRG1-associated factor 180                                      | BAF180      | 0.87     | 0.92     | 0.95     | 1.05     | 0.91       | 0.04 | 15       | 10         | 2.16E-112 |
| Q14152     | eIF3 p167                                                       | EIF3A       | 0.9      | 0.97     | 0.87     | 1.15     | 0.91       | 0.05 | 70       | 47         | 0.00E+00  |
| Q9NRY5-1   | Protein FAM114A2                                                | C5orf3      | 0.91     | 0.98     | 0.85     | 1.18     | 0.91       | 0.07 | 3        | 12         | 4.61E-25  |
| Q86TB9     | PAT1-like protein 1                                             | OK/KN       | 0.88     | 0.87     | 0.99     | 1.01     | 0.91       | 0.07 | 4        | 7.8        | 3.03E-21  |



| UniProt ID | Protein_Name                                                                 | Gene Name | F1 (L/H) | F2 (L/H) | R1 (H/L) | R1 (L/H) | Mean (T/U) | S.D. | Pep. No. | %Seq. Cov. | PEP       |
|------------|------------------------------------------------------------------------------|-----------|----------|----------|----------|----------|------------|------|----------|------------|-----------|
| -1         |                                                                              | S-cl.5    |          |          |          |          |            |      |          |            |           |
| Q9UEW8     | Serine/threonine-protein kinase 39                                           | SPAK      | 0.85     | 0.90     | 0.99     | 1.01     | 0.91       | 0.07 | 5        | 12         | 1.39E-45  |
| P42285     | ATP-dependent helicase SKIV2L2                                               | KIAA0052  | 0.99     | 0.90     | 0.85     | 1.18     | 0.91       | 0.07 | 17       | 19         | 2.42E-78  |
| O75351     | Cell migration-inducing gene 1 protein                                       | MIG1      | 0.93     | 0.82     | 0.99     | 1.01     | 0.91       | 0.09 | 11       | 34         | 4.99E-27  |
| O14579     | Coatomer subunit epsilon                                                     | COPE      | 0.82     | 0.91     | 1.01     | 0.99     | 0.91       | 0.10 | 11       | 49         | 6.56E-160 |
| Q9H4E7     | Differentially expressed in FDCP 6 homolog                                   | DEF6      | 0.82     | 0.89     | 1.03     | 0.97     | 0.91       | 0.11 | 14       | 27         | 4.76E-237 |
| O14908     | GAIP C-terminus-interacting protein                                          | C19orf3   | 0.90     | 1.03     | 0.81     | 1.23     | 0.91       | 0.11 | 6        | 22         | 9.41E-37  |
| Q8TF05-1   | Serine/threonine-protein phosphatase 4 regulatory subunit 1                  | MEG1      | 0.84     | 0.85     | 1.05     | 0.95     | 0.91       | 0.12 | 5        | 7.3        | 6.10E-16  |
| P61586     | Rho cDNA clone 12                                                            | ARH12     | 0.84     | 0.84     | 1.06     | 0.94     | 0.91       | 0.13 | 10       | 75         | 1.65E-151 |
| Q9NP79     | Dopamine-responsive gene 1 protein                                           | C6orf55   | 0.95     | 1.04     | 0.75     | 1.33     | 0.91       | 0.15 | 6        | 26         | 3.78E-58  |
| Q9NQ48     | Leucine zipper transcription factor-like protein 1                           | LZTFL1    | 0.82     | 0.83     | 1.09     | 0.92     | 0.91       | 0.15 | 6        | 25         | 7.65E-66  |
| B4DHD2     | cDNA FLJ55458, highly similar to Programmed cell death 6-interacting protein | DRIP4     | 0.80     | 0.85     | 1.09     | 0.92     | 0.91       | 0.16 | 34       | 47         | 0.00E+00  |
| Q9NVII-3   | Fanconi anemia group I protein                                               | FANCI     | 1.08     | 0.93     | 0.73     | 1.37     | 0.91       | 0.18 | 13       | 13         | 3.51E-102 |
| A0FGR8-2   | Chr2Syt                                                                      | ESYT2     | 0.76     | 0.86     | 1.12     | 0.89     | 0.91       | 0.19 | 12       | 18         | 2.35E-80  |
| Q9ULX3     | Phosphorylation regulatory protein HP-10                                     | ART4      | 0.87     | 1.12     | 0.75     | 1.33     | 0.91       | 0.19 | 4        | 9.5        | 4.92E-29  |
| Q9UDY2-1   | Tight junction protein 2                                                     | TJP2      | 0.69     | 0.99     | 1.06     | 0.94     | 0.91       | 0.20 | 6        | 8.7        | 3.04E-44  |
| P04632     | Calcium-activated neutral proteinase small subunit                           | CAPN4     | 0.85     | 0.73     | 1.16     | 0.86     | 0.91       | 0.22 | 8        | 59         | 2.77E-250 |
| C9JI70     | Putative uncharacterized protein RIF1                                        | RIF1      | 1.04     | 1.08     | 0.62     | 1.61     | 0.91       | 0.25 | 18       | 11         | 6.17E-159 |
| Q32MZ4-2   | GC-binding factor 2                                                          | GCF2      | 0.7      | 0.76     | 1.28     | 0.78     | 0.91       | 0.32 | 21       | 34         | 0.00E+00  |
| Q9HA77     | Cysteine--tRNA ligase                                                        | CARS2     | 1.15     | 1.05     | 0.54     | 1.85     | 0.91       | 0.33 | 3        | 7.1        | 4.36E-20  |
| Q9BYD2     | 39S ribosomal protein L9, mitochondrial                                      | MRPL9     | 0.77     | 0.68     | 1.29     | 0.78     | 0.91       | 0.33 | 5        | 22         | 1.41E-68  |
| P16219     | Butyryl-CoA dehydrogenase                                                    | ACADS     | 0.60     | 0.79     | 1.35     | 0.74     | 0.91       | 0.39 | 3        | 8          | 1.31E-71  |
| Q96RU      | Formin-binding                                                               | FBP17     | 0.65     | 0.68     | 1.41     | 0.71     | 0.91       | 0.43 | 10       | 17         | 4.19E-64  |

| UniProt ID | Protein_Name                                               | Gene Name | F1 (L/H) | F2 (L/H) | R1 (H/L) | R1 (L/H) | Mean (T/U) | S.D. | Pep. No. | %Seq. Cov. | PEP       |
|------------|------------------------------------------------------------|-----------|----------|----------|----------|----------|------------|------|----------|------------|-----------|
| 3-1        | protein 1                                                  |           |          |          |          |          |            |      |          |            |           |
| Q9Y3C1     | HBV pre-S2 trans-regulated protein 3                       | CGI-117   | 1.14     |          | 0.69     | 1.45     | 0.92       | 0.32 | 7        | 39         | 3.02E-79  |
| A8MVT9     | 3-ketoacyl-CoA thiolase, mitochondrial                     | ACAA2     | 0.98     | 0.85     |          |          | 0.92       | 0.09 | 2        | 9.8        | 6.38E-36  |
| Q9NUI1-1   | 2,4-dienoyl-CoA reductase 2                                | DECR2     | 1.01     | 0.82     |          |          | 0.92       | 0.13 | 3        | 12         | 2.99E-18  |
| Q9UFW8     | 20 kDa CGG-binding protein                                 | CGGBP     | 0.76     | 1.07     |          |          | 0.92       | 0.22 | 6        | 42         | 7.24E-18  |
| Q14CX7-1   | Mitochondrial distribution and morphology protein 20       | C12orf30  | 1.17     |          | 0.66     | 1.52     | 0.92       | 0.36 | 5        | 8.1        | 1.83E-22  |
| A6NGG4     | Putative uncharacterized protein RPS6KA1                   | RPS6KA1   |          | 0.63     | 1.20     | 0.83     | 0.92       | 0.40 | 3        | 7          | 1.28E-21  |
| P61247     | 40S ribosomal protein S3a                                  | FTE1      | 0.93     | 0.93     | 0.89     | 1.12     | 0.92       | 0.02 | 19       | 62         | 0.00E+00  |
| Q9H4A3-1   | Erythrocyte 65 kDa protein                                 | KDP       | 0.89     | 0.92     | 0.94     | 1.06     | 0.92       | 0.03 | 8        | 4          | 1.47E-50  |
| Q9Y224     | UPF0568 protein C14orf166                                  | C14orf166 | 0.90     | 0.96     | 0.89     | 1.12     | 0.92       | 0.04 | 15       | 65         | 0.00E+00  |
| Q96RR5     | Hepatocellular carcinoma-associated antigen 90             | HCA90     | 0.93     | 0.97     | 0.85     | 1.18     | 0.92       | 0.06 | 16       | 25         | 5.37E-114 |
| Q8IURO     | Trafficking protein particle complex subunit 5             | TRAPP C5  | 0.95     | 0.98     | 0.82     | 1.22     | 0.92       | 0.09 | 5        | 36         | 4.54E-92  |
| Q9NPD3     | Exosome complex exonuclease RRP41                          | EXOSC4    | 0.91     | 0.83     | 1.01     | 0.99     | 0.92       | 0.09 | 5        | 21         | 8.17E-38  |
| P55210-3   | Apoptotic protease Mch-3                                   | CASP7     | 0.82     | 0.92     | 1.01     | 0.99     | 0.92       | 0.10 | 4        | 16         | 8.15E-54  |
| P49792     | 358 kDa nucleoporin                                        | NUP358    | 0.94     | 1.00     | 0.81     | 1.23     | 0.92       | 0.10 | 46       | 21         | 0.00E+00  |
| O75368     | SH3 domain-binding glutamic acid-rich-like protein         | SH3BGR    | 0.88     | 0.84     | 1.03     | 0.97     | 0.92       | 0.10 | 7        | 77         | 4.30E-93  |
| O75116     | p164 ROCK-2                                                | KIAA0619  | 0.81     | 0.89     | 1.05     | 0.95     | 0.92       | 0.12 | 12       | 9.1        | 2.08E-57  |
| P20073-1   | Annexin A7                                                 | ANX7      | 0.84     | 0.84     | 1.07     | 0.93     | 0.92       | 0.13 | 13       | 28         | 1.39E-145 |
| Q9UNS2     | COP9 signalosome complex subunit 3                         | COPS3     | 0.90     | 1.06     | 0.79     | 1.27     | 0.92       | 0.14 | 5        | 12         | 3.77E-26  |
| Q96GK7     | Fumarylacetoacetate hydrolase domain-containing protein 2A | CGI-105   | 0.84     | 0.81     | 1.10     | 0.91     | 0.92       | 0.16 | 4        | 16         | 4.01E-39  |
| Q9Y3C8     | Ubiquitin-fold modifier-conjugating enzyme 1               | CGI-126   | 0.83     | 0.81     | 1.11     | 0.90     | 0.92       | 0.17 | 5        | 29         | 4.78E-10  |
| P54886-1   | Aldehyde dehydrogenase family 18 member A1                 | ALDH18A1  | 1.04     | 1.00     | 0.71     | 1.41     | 0.92       | 0.18 | 21       | 29         | 6.86E-146 |
| Q96SB4-2   | Serine/arginine-rich protein-specific kinase               | SRPK1     | 1.08     | 0.95     | 0.72     | 1.39     | 0.92       | 0.18 | 6        | 13         | 1.80E-48  |

| UniProt ID | Protein_Name                                                            | Gene Name | F1 (L/H) | F2 (L/H) | R1 (H/L) | R1 (L/H) | Mean (T/U) | S.D. | Pep. No. | %Seq. Cov. | PEP       |
|------------|-------------------------------------------------------------------------|-----------|----------|----------|----------|----------|------------|------|----------|------------|-----------|
|            | 1                                                                       |           |          |          |          |          |            |      |          |            |           |
| B7Z6Q4     | cDNA FLJ54837, highly similar to Inositol monophosphatase (EC 3.1.3.25) | IMPA      | 0.82     | 0.79     | 1.14     | 0.88     | 0.92       | 0.19 | 7        | 27         | 1.03E-59  |
| Q9Y285     | CML33                                                                   | FARS      | 1.11     | 0.93     | 0.71     | 1.41     | 0.92       | 0.20 | 8        | 22         | 2.76E-154 |
| P62861     | 40S ribosomal protein S30                                               | FAU       | 1.01     | 1.07     | 0.67     | 1.49     | 0.92       | 0.22 | 2        | 8.3        | 5.72E-03  |
| Q96BK5-1   | Liver-related putative tumor suppressor                                 | LPTL      | 1.04     | 1.24     | 0.47     | 2.13     | 0.92       | 0.40 | 3        | 19         | 5.31E-48  |
| Q53HL1     | Myosin regulatory light chain MRCL3 variant                             | MRLC2     | 0.63     | 0.64     | 1.48     | 0.68     | 0.92       | 0.49 | 7        | 55         | 1.84E-189 |
| P20701-2   | CD11 antigen-like family member A                                       | CD11A     | 0.63     | 0.62     | 1.50     | 0.67     | 0.92       | 0.51 | 4        | 4.1        | 5.50E-45  |
| P04183     | Thymidine kinase, cytosolic                                             | TK1       | 1.11     | 1.08     | 0.56     | 1.79     | 0.92       | 0.31 | 6        | 26         | 1.38E-75  |
| Q7Z417     | 82 kDa FMRP-interacting protein                                         | KIAA1321  | 0.91     | 0.95     | 0.90     | 1.11     | 0.92       | 0.03 | 10       | 15         | 4.76E-57  |
| B4DSU8     | Dnm1p/Vps1p-like protein                                                | DNM1L     | 0.88     |          | 0.96     | 1.04     | 0.92       | 0.06 | 14       | 29         | 0.00E+00  |
| B7Z2W9     | Serine/threonine-protein phosphatase                                    | PPP6      | 0.87     |          | 0.97     | 1.03     | 0.92       | 0.07 | 9        | 37         | 6.74E-188 |
| O75131     | Copine III                                                              | CPN3      | 0.97     |          | 0.87     | 1.15     | 0.92       | 0.07 | 3        | 7.6        | 6.74E-08  |
| Q99986     | Serine/threonine-protein kinase VRK1                                    | VRK1      | 0.93     | 0.99     | 0.84     | 1.19     | 0.92       | 0.08 | 8        | 26         | 8.61E-112 |
| Q96ER3     | Protein SAAL1                                                           | SAAL1     | 0.90     | 1.02     | 0.84     | 1.19     | 0.92       | 0.09 | 7        | 19         | 3.91E-116 |
| Q9Y5A9-1   | CLL-associated antigen KW-14                                            | HGRG8     | 0.85     | 0.84     | 1.07     | 0.93     | 0.92       | 0.13 | 10       | 16         | 1.10E-72  |
| Q15274     | Nicotinate-nucleotide pyrophosphorylase [carboxylating]                 | QPRT      | 0.97     | 1.02     | 0.77     | 1.30     | 0.92       | 0.13 | 3        | 11         | 7.44E-12  |
| Q8N108-9   | Mesoderm induction early response protein 1                             | KIAA1610  | 0.93     | 0.78     | 1.05     | 0.95     | 0.92       | 0.14 | 3        | 5.6        | 1.23E-13  |
| Q13769     | Functional spliceosome-associated protein 79                            | C22orf19  | 0.78     | 0.87     | 1.11     | 0.90     | 0.92       | 0.17 | 6        | 11         | 1.57E-07  |
| O00116     | Aging-associated gene 5 protein                                         | AAG5      | 0.77     | 0.81     | 1.18     | 0.85     | 0.92       | 0.23 | 13       | 27         | 1.09E-168 |
| Q13422-1   | DNA-binding protein Ikaros                                              | IK1       | 0.79     | 0.76     | 1.21     | 0.83     | 0.92       | 0.25 | 9        | 22         | 4.36E-40  |
| Q9UBE0     | SUMO-activating enzyme subunit 1                                        | AOS1      | 0.79     | 0.76     | 1.21     | 0.83     | 0.92       | 0.25 | 18       | 62         | 2.28E-206 |
| Q14847-1   | LIM and SH3 domain protein 1                                            | LASP1     | 0.69     | 0.69     | 1.38     | 0.72     | 0.92       | 0.40 | 10       | 47         | 1.34E-79  |
| P18564     | Integrin beta-6                                                         | ITGB6     |          | 0.93     | 0.91     | 1.10     | 0.92       | 0.01 | 2        | 2.2        | 8.93E-03  |
| P62269     | 40S ribosomal protein S18                                               | D6S218E   | 0.94     | 0.91     | 0.91     | 1.10     | 0.92       | 0.02 | 10       | 45         | 1.23E-55  |
| Q08J23     | NOL1/NOP2/Sun domain family                                             | NSUN2     | 0.95     | 0.92     | 0.89     | 1.12     | 0.92       | 0.03 | 31       | 49         | 5.41E-214 |

| UniProt ID | Protein_Name                                           | Gene Name | F1 (L/H) | F2 (L/H) | R1 (H/L) | R1 (L/H) | Mean (T/U) | S.D. | Pep. No. | %Seq. Cov. | PEP      |
|------------|--------------------------------------------------------|-----------|----------|----------|----------|----------|------------|------|----------|------------|----------|
|            | member 2                                               |           |          |          |          |          |            |      |          |            |          |
| Q9BYN8     | 28S ribosomal protein S13, mitochondrial               | C20orf193 | 0.98     | 0.91     | 0.87     | 1.15     | 0.92       | 0.06 | 6        | 32         | 4.70E-73 |
| Q9H6F5     | Coiled-coil domain-containing protein 86               | CCDC86    | 0.79     | 1.06     | 0.91     | 1.10     | 0.92       | 0.14 | 5        | 18         | 1.30E-11 |
| P53041     | Serine/threonine-protein phosphatase 5                 | PPP5      | 0.88     | 0.80     | 1.08     | 0.93     | 0.92       | 0.14 | 6        | 15         | 5.79E-99 |
| Q9UPU5     | Deubiquitinating enzyme 24                             | KIAA1057  | 0.84     | 0.80     | 1.12     | 0.89     | 0.92       | 0.17 | 7        | 3.6        | 2.41E-29 |
| Q6FHU2     | Similar to Phosphoglycerate mutase 1                   | PGAM1     | 1.05     |          | 0.79     | 1.27     | 0.92       | 0.18 | 5        | 24         | 9.37E-74 |
| B0I1S2     | MYH14 variant protein                                  | FP17425   | 0.76     |          | 1.08     | 0.93     | 0.92       | 0.23 | 10       | 4.1        | 4.36E-66 |
| Q9H2K0     | Translation initiation factor IF-3, mitochondrial      | DC38      | 0.73     |          | 1.11     | 0.90     | 0.92       | 0.27 | 2        | 6.5        | 3.74E-04 |
| P43146     | Immunoglobulin superfamily DCC subclass member 2       | IGDCC2    |          |          | 0.92     | 1.09     | 0.92       |      | 2        | 2.3        | 4.33E-14 |
| Q9H6W3     | Lysine-specific demethylase NO66                       | C14orf169 | 0.92     |          |          |          | 0.92       |      | 2        | 4.8        | 1.18E-14 |
| O00308     | Atrophin-1-interacting protein 2                       | WWP2      |          | 0.92     |          |          | 0.92       |      | 2        | 2.9        | 2.43E-05 |
| Q15031     | Leucine--tRNA ligase                                   | KIAA0028  |          | 0.92     |          |          | 0.92       |      | 2        | 2.1        | 6.00E-03 |
| Q9BUT9-1   | Protein FAM195A                                        | C16orf14  | 0.92     |          |          |          | 0.92       |      | 2        | 19         | 1.30E-26 |
| Q8TBM8-1   | DnaJ homolog subfamily B member 14                     | DNAJB14   |          | 0.92     |          |          | 0.92       |      | 2        | 6.3        | 2.25E-04 |
| Q5U5X0     | LYR motif-containing protein 7                         | C5orf31   | 0.92     |          |          |          | 0.92       |      | 2        | 32         | 3.74E-06 |
| Q7Z6B0-1   | Coiled-coil domain-containing protein 91               | CCDC91    | 0.92     |          |          |          | 0.92       |      | 2        | 3.4        | 1.62E-02 |
| Q8N0X4-1   | Citrate lyase subunit beta-like protein, mitochondrial | CLB       | 0.92     |          |          |          | 0.92       |      | 2        | 9.1        | 5.12E-05 |
| Q1ED39     | Protein C16orf88                                       | C16orf88  |          | 0.92     |          |          | 0.92       |      | 2        | 5          | 7.97E-06 |
| C9JB44     | 60S ribosomal protein L39                              | RPL39     | 0.92     |          |          |          | 0.92       |      | 2        | 12         | 1.17E-03 |
| C9JLW8     | Protein FAM195B                                        | FAM195B   | 0.92     |          |          |          | 0.92       |      | 2        | 30         | 2.74E-05 |
| Q9P0J0     | Cell death regulatory protein GRIM-19                  | CDA016    | 0.92     |          |          |          | 0.92       |      | 2        | 12         | 3.96E-07 |
| Q8N5L8     | Alba-like protein C9orf23                              | C9orf23   | 0.92     |          |          |          | 0.92       |      | 3        | 25         | 8.64E-20 |
| O00159-1   | Myosin I beta                                          | MYO1C     | 0.92     |          |          |          | 0.92       |      | 3        | 4.5        | 3.91E-32 |
| P51648-2   | Aldehyde dehydrogenase 10                              | ALDH10    |          | 0.92     |          |          | 0.92       |      | 4        | 8.9        | 3.26E-14 |

| UniProt ID | Protein_Name                                    | Gene Name      | F1 (L/H) | F2 (L/H) | R1 (H/L) | R1 (L/H) | Mean (T/U) | S.D. | Pep. No. | %Seq. Cov. | PEP       |
|------------|-------------------------------------------------|----------------|----------|----------|----------|----------|------------|------|----------|------------|-----------|
| Q9HBH5     | Alcohol dehydrogenase PAN2                      | PAN2           | 0.92     |          |          |          | 0.92       |      | 5        | 19         | 4.18E-41  |
| Q9NZ32     | Actin-related protein 10                        | ACTR10         | 0.92     |          |          |          | 0.92       |      | 6        | 17         | 2.74E-24  |
| O75391     | Sperm-associated antigen 7                      | SPAG7          | 0.86     | 0.96     | 0.95     | 1.05     | 0.92       | 0.06 | 5        | 23         | 2.81E-49  |
| P56182     | Novel nuclear protein 1                         | D21S2056E      | 0.98     | 1.07     | 0.72     | 1.39     | 0.92       | 0.18 | 6        | 14         | 3.29E-68  |
| Q8WYJ6-1   | LARP                                            | LARP           | 0.93     | 0.92     | 0.92     | 1.09     | 0.92       | 0.01 | 14       | 44         | 1.80E-145 |
| Q05086-1   | E6AP ubiquitin-protein ligase                   | E6AP           | 0.89     | 0.96     | 0.92     | 1.09     | 0.92       | 0.04 | 7        | 12         | 4.21E-76  |
| A8MV58     | Putative uncharacterized protein DBN1           | DBN1           | 0.94     | 0.96     | 0.87     | 1.15     | 0.92       | 0.05 | 18       | 31         | 1.39E-146 |
| Q16512-2   | Protease-activated kinase 1                     | PKN1           | 0.95     | 0.86     | 0.96     | 1.04     | 0.92       | 0.06 | 14       | 22         | 2.39E-89  |
| P11717     | 300 kDa mannose 6-phosphate receptor            | IGF2R          | 0.97     | 0.95     | 0.85     | 1.18     | 0.92       | 0.06 | 33       | 17         | 2.31E-116 |
| Q9BZZ5-2   | Antiapoptosis clone 11 protein                  | API5           | 0.85     | 0.9      | 1.02     | 0.98     | 0.92       | 0.09 | 13       | 23         | 6.71E-93  |
| Q5HYG7     | Putative uncharacterized protein DKFZp686M24262 | DKFZp686M24262 | 0.91     | 0.83     | 1.03     | 0.97     | 0.92       | 0.10 | 11       | 27         | 5.71E-150 |
| Q9BW27     | 85 kDa nucleoporin                              | NUP75          | 1.04     | 0.92     | 0.81     | 1.23     | 0.92       | 0.12 | 3        | 7.5        | 8.89E-67  |
| Q96H79-1   | Zinc finger CCCH-type antiviral protein 1-like  | C7orf39        | 1.04     | 0.92     | 0.81     | 1.23     | 0.92       | 0.12 | 9        | 55         | 1.84E-26  |
| P18031     | Protein-tyrosine phosphatase 1B                 | PTP1B          | 0.86     | 0.85     | 1.06     | 0.94     | 0.92       | 0.12 | 7        | 19         | 9.33E-58  |
| Q9HD42-1   | Charged multivesicular body protein 1a          | CHMP1          | 0.83     | 0.88     | 1.06     | 0.94     | 0.92       | 0.12 | 5        | 22         | 1.10E-06  |
| Q9NTI5-1   | Androgen-induced proliferation inhibitor        | APRIN          | 0.84     | 0.86     | 1.07     | 0.93     | 0.92       | 0.13 | 23       | 18         | 4.29E-130 |
| Q9NZN5-1   | Leukemia-associated RhoGEF                      | ARHGEF12       | 1.00     | 1.00     | 0.77     | 1.30     | 0.92       | 0.13 | 3        | 3          | 1.59E-07  |
| P62750     | 60S ribosomal protein L23a                      | RPL23A         | 0.94     | 1.05     | 0.78     | 1.28     | 0.92       | 0.14 | 11       | 52         | 1.30E-51  |
| P35080-1   | Profilin II                                     | PFN2           | 0.83     | 0.86     | 1.08     | 0.93     | 0.92       | 0.14 | 3        | 26         | 3.02E-28  |
| Q9BUQ8     | 100 kDa U5 snRNP-specific protein               | DDX23          | 0.81     | 0.88     | 1.08     | 0.93     | 0.92       | 0.14 | 17       | 23         | 3.81E-60  |
| O75083-1   | Actin-interacting protein 1                     | WDR1           | 0.86     | 0.81     | 1.10     | 0.91     | 0.92       | 0.16 | 25       | 56         | 7.82E-147 |
| Q9HDC9-1   | Adipocyte plasma membrane-associated protein    | APMAP          | 0.82     | 0.83     | 1.12     | 0.89     | 0.92       | 0.17 | 10       | 33         | 4.59E-50  |
| P82933     | 28S ribosomal protein S9, mitochondrial         | MRPS9          | 0.80     | 0.80     | 1.17     | 0.85     | 0.92       | 0.21 | 5        | 14         | 2.82E-16  |

| UniProt ID | Protein_Name                                                                             | Gene Name | F1 (L/H) | F2 (L/H) | R1 (H/L) | R1 (L/H) | Mean (T/U) | S.D. | Pep. No. | %Seq. Cov. | PEP       |
|------------|------------------------------------------------------------------------------------------|-----------|----------|----------|----------|----------|------------|------|----------|------------|-----------|
| Q59F66     | DEAD box polypeptide 17 isoform p82 variant                                              | DDX17     | 0.79     | 0.79     | 1.19     | 0.84     | 0.92       | 0.23 | 32       | 49         | 1.95E-272 |
| Q92625     | Ankyrin repeat and SAM domain-containing protein 1A                                      | ANKS1     | 1.19     | 0.79     | 0.79     | 1.27     | 0.92       | 0.23 | 3        | 4.4        | 3.90E-10  |
| Q9UL15-2   | BAG family molecular chaperone regulator 5                                               | BAG5      | 1.15     | 1.14     | 0.48     | 2.08     | 0.92       | 0.38 | 4        | 13         | 8.83E-102 |
| O75475-1   | CLL-associated antigen KW-7                                                              | DFS70     | 0.66     | 0.71     | 1.40     | 0.71     | 0.92       | 0.41 | 19       | 38         | 9.63E-208 |
| Q92619     | Minor histocompatibility antigen HA-1                                                    | HMHA1     | 0.67     | 0.63     | 1.47     | 0.68     | 0.92       | 0.47 | 21       | 25         | 2.47E-191 |
| Q53F19-1   | Protein ELG                                                                              | C17orf85  | 0.89     | 0.81     | 1.07     | 0.93     | 0.92       | 0.13 | 6        | 9.7        | 1.39E-13  |
| Q9Y376     | Calcium-binding protein 39                                                               | CAB39     | 0.81     | 0.89     | 1.07     | 0.93     | 0.92       | 0.13 | 7        | 16         | 3.05E-52  |
| O75531     | Barrier-to-autointegration factor                                                        | BAF       | 1.07     | 0.90     | 0.80     | 1.25     | 0.92       | 0.14 | 5        | 57         | 9.10E-30  |
| P42224-1   | Signal transducer and activator of transcription 1-alpha/beta                            | STAT1     | 0.86     | 1.11     | 0.80     | 1.25     | 0.92       | 0.16 | 4        | 7.1        | 6.58E-56  |
| P20645     | 46 kDa mannose 6-phosphate receptor                                                      | M6PR      | 0.91     |          | 0.94     | 1.06     | 0.93       | 0.02 | 4        | 18         | 6.16E-30  |
| Q9NQ50     | 39S ribosomal protein L40, mitochondrial                                                 | MRPL40    | 0.90     |          | 0.95     | 1.05     | 0.93       | 0.04 | 2        | 17         | 9.83E-29  |
| Q8N9B5-1   | Junction-mediating and -regulatory protein                                               | JMY       |          | 0.95     | 0.90     | 1.11     | 0.93       | 0.04 | 2        | 3.4        | 1.82E-19  |
| Q9Y5Y2     | Cytosolic Fe-S cluster assembly factor NUBP2                                             | NUBP2     | 1.03     |          | 0.82     | 1.22     | 0.93       | 0.15 | 6        | 38         | 4.59E-75  |
| Q5HYI8     | Rab-like protein 3                                                                       | RABL3     | 1.03     | 0.82     |          |          | 0.93       | 0.15 | 3        | 14         | 1.22E-14  |
| B4E1N4     | cDNA FLJ61695, highly similar to Glioma tumor suppressor candidate region gene 2 protein | GLTSCR2   | 1.09     |          | 0.76     | 1.32     | 0.93       | 0.23 | 4        | 9.6        | 3.93E-58  |
| Q96I59     | Asparagine--tRNA ligase                                                                  | NARS2     | 0.75     |          | 1.10     | 0.91     | 0.93       | 0.25 | 3        | 6.3        | 2.61E-07  |
| Q9NT62-1   | Autophagy-related protein 3                                                              | APG3      | 0.94     | 0.96     | 0.88     | 1.14     | 0.93       | 0.04 | 6        | 22         | 2.58E-43  |
| B3KPG9     | Calumenin, isoform CRA_c                                                                 | CALU      | 0.87     | 0.99     | 0.92     | 1.09     | 0.93       | 0.06 | 5        | 26         | 1.25E-20  |
| Q7Z434-1   | CARD adapter inducing interferon beta                                                    | IPS1      | 0.73     | 0.82     | 1.23     | 0.81     | 0.93       | 0.27 | 2        | 8.1        | 3.31E-45  |
| Q9P031     | Coiled-coil domain-containing protein 59                                                 | BR22      | 0.73     | 1.32     | 0.73     | 1.37     | 0.93       | 0.34 | 2        | 7.1        | 1.87E-10  |
| A6NDZ0     | 33 kDa VAMP-associated protein                                                           | VAP33     | 0.90     | 0.92     | 0.96     | 1.04     | 0.93       | 0.03 | 11       | 37         | 1.48E-66  |
| O95347-1   | Chromosome-associated protein E                                                          | CAPE      | 0.90     | 0.90     | 0.98     | 1.02     | 0.93       | 0.05 | 40       | 36         | 4.94E-265 |

| UniProt ID | Protein_Name                                      | Gene Name | F1 (L/H) | F2 (L/H) | R1 (H/L) | R1 (L/H) | Mean (T/U) | S.D. | Pep. No. | %Seq. Cov. | PEP       |
|------------|---------------------------------------------------|-----------|----------|----------|----------|----------|------------|------|----------|------------|-----------|
| A8CGI3     | Nucleosome assembly protein 1-like 4              | NAP1L4    | 0.89     | 0.90     | 0.99     | 1.01     | 0.93       | 0.06 | 12       | 36         | 7.07E-122 |
| Q02880-1   | DNA topoisomerase 2-beta                          | TOP2B     | 0.90     | 0.89     | 0.99     | 1.01     | 0.93       | 0.06 | 35       | 25         | 1.33E-292 |
| O43290     | SNU66 homolog                                     | SART1     | 0.88     | 0.91     | 0.99     | 1.01     | 0.93       | 0.06 | 27       | 41         | 3.19E-279 |
| Q9BVJ6-1   | Antigen NY-CO-16                                  | SDCCA G16 | 0.89     | 1.00     | 0.89     | 1.12     | 0.93       | 0.06 | 14       | 24         | 7.06E-122 |
| P61964     | BMP2-induced 3-kb gene protein                    | BIG3      | 1.02     | 0.95     | 0.81     | 1.23     | 0.93       | 0.11 | 5        | 17         | 8.03E-36  |
| Q8NFH5     | 35 kDa nucleoporin                                | MP44      | 0.87     | 1.06     | 0.85     | 1.18     | 0.93       | 0.12 | 6        | 26         | 2.99E-43  |
| P08865     | 37 kDa laminin receptor precursor                 | LAMBR     | 1.01     | 0.99     | 0.78     | 1.28     | 0.93       | 0.13 | 14       | 57         | 2.06E-192 |
| Q15942     | Zyxin                                             | ZYX       | 0.76     | 0.96     | 1.06     | 0.94     | 0.93       | 0.15 | 6        | 18         | 2.47E-33  |
| Q9UNS1-1   | Protein timeless homolog                          | TIM       | 1.00     | 1.03     | 0.75     | 1.33     | 0.93       | 0.15 | 8        | 8.8        | 2.13E-75  |
| Q96ME7     | Zinc finger protein 512                           | KIAA1805  | 0.87     | 0.77     | 1.14     | 0.88     | 0.93       | 0.19 | 3        | 6.7        | 3.13E-18  |
| Q9P2R7-1   | ATP-specific succinyl-CoA synthetase subunit beta | SUCLA2    | 0.70     | 0.80     | 1.28     | 0.78     | 0.93       | 0.31 | 10       | 21         | 5.33E-98  |
| P55084     | 3-ketoacyl-CoA thiolase                           | HADHB     | 0.71     | 0.74     | 1.33     | 0.75     | 0.93       | 0.35 | 11       | 35         | 3.76E-36  |
| Q9NXE4-4   | Neutral sphingomyelinase 3                        | KIAA1418  | 1.40     | 0.80     | 0.58     | 1.72     | 0.93       | 0.42 | 2        | 3.2        | 2.70E-07  |
| B0I1T2-1   | Minor histocompatibility antigen HA-2             | MYO1G     | 0.62     | 0.64     | 1.52     | 0.66     | 0.93       | 0.51 | 25       | 31         | 0.00E+00  |
| Q9UGV2-1   | Protein NDRG3                                     | NDRG3     |          | 0.96     | 0.90     | 1.11     | 0.93       | 0.04 | 7        | 28         | 3.92E-171 |
| Q6NUQ4     | Transmembrane protein 214                         | PP446     |          | 0.86     | 1.00     | 1.00     | 0.93       | 0.10 | 4        | 6          | 3.56E-06  |
| P10301     | Ras-related protein R-Ras                         | RRAS      | 0.84     |          | 1.02     | 0.98     | 0.93       | 0.13 | 4        | 25         | 1.91E-12  |
| Q04837     | PWP1-interacting protein 17                       | SSBP      | 1.02     |          | 0.84     | 1.19     | 0.93       | 0.13 | 5        | 39         | 0.00E+00  |
| Q9NVK5-1   | FGFR1 oncogene partner 2                          | FGFR1OP2  | 1.04     | 0.82     |          |          | 0.93       | 0.16 | 2        | 11         | 4.42E-21  |
| Q5HY50     | Ribosomal protein L10                             | RPL10     | 0.95     | 0.92     | 0.92     | 1.09     | 0.93       | 0.02 | 12       | 51         | 3.94E-163 |
| O95232-1   | cAMP regulatory element-associated protein 1      | CREAP1    | 0.91     | 0.95     | 0.93     | 1.08     | 0.93       | 0.02 | 10       | 30         | 5.72E-165 |
| Q9UHY1     | Nuclear receptor-binding protein                  | BCON3     | 0.91     | 0.92     | 0.96     | 1.04     | 0.93       | 0.03 | 3        | 7.9        | 8.94E-18  |
| P46783     | 40S ribosomal protein S10                         | RPS10     | 0.96     | 0.90     | 0.93     | 1.08     | 0.93       | 0.03 | 8        | 53         | 4.86E-178 |
| O14562     | Ubiquitin domain-containing protein UBF1          | UBFD1     | 0.91     | 0.98     | 0.90     | 1.11     | 0.93       | 0.04 | 4        | 8.4        | 8.19E-20  |
| B4DKA3     | cDNA FLJ60624, highly similar to                  | EPS15L1   | 0.93     | 0.98     | 0.88     | 1.14     | 0.93       | 0.05 | 10       | 18         | 3.44E-41  |

| UniProt ID | Protein_Name                                         | Gene Name | F1 (L/H) | F2 (L/H) | R1 (H/L) | R1 (L/H) | Mean (T/U) | S.D. | Pep. No. | %Seq. Cov. | PEP       |
|------------|------------------------------------------------------|-----------|----------|----------|----------|----------|------------|------|----------|------------|-----------|
|            | Epidermal growth factor receptor substrate 15-like 1 |           |          |          |          |          |            |      |          |            |           |
| Q8NB90-1   | ATPase family protein 2 homolog                      | AFG2      | 0.87     | 0.95     | 0.97     | 1.03     | 0.93       | 0.05 | 9        | 13         | 1.46E-85  |
| Q9NWV4     | Chromosome 1 open reading frame 123                  | C1orf123  | 1.00     | 0.90     | 0.89     | 1.12     | 0.93       | 0.06 | 3        | 35         | 4.52E-15  |
| Q6NXE6     | Armadillo repeat-containing protein 6                | ARMC6     | 0.88     | 0.91     | 1.00     | 1.00     | 0.93       | 0.06 | 7        | 23         | 1.47E-81  |
| P23528     | 18 kDa phosphoprotein                                | CFL       | 0.91     | 0.88     | 1.00     | 1.00     | 0.93       | 0.06 | 15       | 68         | 0.00E+00  |
| P46782     | 40S ribosomal protein S5                             | RPS5      | 0.86     | 0.94     | 0.99     | 1.01     | 0.93       | 0.07 | 11       | 47         | 1.08E-238 |
| Q9NZZ3     | Charged multivesicular body protein 5                | C9orf83   | 0.97     | 0.85     | 0.97     | 1.03     | 0.93       | 0.07 | 6        | 42         | 3.08E-16  |
| P23588     | Eukaryotic translation initiation factor 4B          | EIF4B     | 0.97     | 0.97     | 0.85     | 1.18     | 0.93       | 0.07 | 27       | 40         | 0.00E+00  |
| O00255-1   | Menin                                                | MEN1      | 1.01     | 0.89     | 0.89     | 1.12     | 0.93       | 0.07 | 3        | 5.9        | 8.45E-14  |
| P62701     | 40S ribosomal protein S4, X isoform                  | CCG2      | 0.96     | 0.98     | 0.85     | 1.18     | 0.93       | 0.07 | 25       | 67         | 2.23E-289 |
| P63244     | Cell proliferation-inducing gene 21 protein          | GNB2L1    | 0.95     | 1.00     | 0.84     | 1.19     | 0.93       | 0.08 | 21       | 79         | 0.00E+00  |
| P31483-1   | Nucleolysin TIA-1 isoform p15                        | TIA1      | 0.88     | 0.88     | 1.03     | 0.97     | 0.93       | 0.09 | 7        | 24         | 1.76E-68  |
| Q9Y2Z4     | Tyrosine--tRNA ligase                                | CGI-04    | 0.99     | 0.83     | 0.97     | 1.03     | 0.93       | 0.09 | 4        | 8.8        | 1.96E-35  |
| Q9NPQ8-1   | Protein Ric-8A                                       | RIC8A     | 1        | 0.99     | 0.8      | 1.25     | 0.93       | 0.11 | 11       | 29         | 5.19E-228 |
| Q8IU60-1   | mRNA-decapping enzyme 2                              | DCP2      | 0.97     | 1.02     | 0.80     | 1.25     | 0.93       | 0.12 | 2        | 6          | 2.98E-10  |
| O95218-1   | Zinc finger protein 265                              | ZIS       | 0.84     | 0.88     | 1.07     | 0.93     | 0.93       | 0.12 | 5        | 15         | 5.02E-18  |
| Q9H0A8-1   | COMM domain-containing protein 4                     | COMM D4   | 1.03     | 0.98     | 0.78     | 1.28     | 0.93       | 0.13 | 5        | 37         | 9.47E-145 |
| Q96DI7     | 38 kDa-splicing factor                               | PRP8BP    | 0.96     | 0.78     | 1.05     | 0.95     | 0.93       | 0.14 | 17       | 54         | 2.77E-117 |
| Q9UPN7     | SAPS domain family member 1                          | KIAA1115  | 1.09     | 0.89     | 0.81     | 1.23     | 0.93       | 0.14 | 12       | 26         | 1.13E-93  |
| Q6YN16-1   | Hydroxysteroid dehydrogenase-like protein 2          | C9orf99   | 0.90     | 0.79     | 1.10     | 0.91     | 0.93       | 0.16 | 3        | 9.3        | 2.85E-16  |
| O76094     | Signal recognition particle 72 kDa protein           | SRP72     | 0.81     | 0.87     | 1.11     | 0.90     | 0.93       | 0.16 | 22       | 42         | 0.00E+00  |
| O43665-3   | Regulator of G-protein signaling 10                  | RGS10     | 1.05     |          | 0.81     | 1.23     | 0.93       | 0.17 | 4        | 28         | 1.25E-26  |
| Q14344     | Guanine nucleotide-binding protein subunit alpha-13  | GNA13     | 0.95     | 1.09     | 0.75     | 1.33     | 0.93       | 0.17 | 4        | 14         | 3.76E-32  |
| Q8NEL      | DDHD domain-containing protein 1                     | DDHD1     | 0.90     | 0.77     | 1.12     | 0.89     | 0.93       | 0.18 | 2        | 4          | 2.53E-02  |



| UniProt ID | Protein_Name                                                                                                                 | Gene Name | F1 (L/H) | F2 (L/H) | R1 (H/L) | R1 (L/H) | Mean (T/U) | S.D. | Pep. No. | %Seq. Cov. | PEP       |
|------------|------------------------------------------------------------------------------------------------------------------------------|-----------|----------|----------|----------|----------|------------|------|----------|------------|-----------|
| 9-1        |                                                                                                                              |           |          |          |          |          |            |      |          |            |           |
| A5YVE9     | cDNA FLJ59461, highly similar to Pyruvate dehydrogenase E1 component alpha subunit, somatic form, mitochondrial (EC 1.2.4.1) | PDHA1     | 0.76     | 0.90     | 1.13     | 0.88     | 0.93       | 0.19 | 12       | 32         | 7.51E-42  |
| P61024     | Cyclin-dependent kinases regulatory subunit 1                                                                                | CKS1      | 0.7      | 1.14     | 0.95     | 1.05     | 0.93       | 0.22 | 3        | 66         | 1.64E-05  |
| Q9BXR0     | Guanine insertion enzyme                                                                                                     | QTRT1     | 1.14     | 0.98     | 0.67     | 1.49     | 0.93       | 0.24 | 3        | 12         | 8.73E-11  |
| Q99536     | Synaptic vesicle membrane protein VAT-1 homolog                                                                              | VAT1      | 0.71     | 0.77     | 1.31     | 0.76     | 0.93       | 0.33 | 7        | 24         | 1.77E-62  |
| O95571     | Ethylmalonic encephalopathy protein 1                                                                                        | ETHE1     | 0.74     | 0.67     | 1.38     | 0.72     | 0.93       | 0.39 | 7        | 43         | 9.57E-52  |
| P14317     | Hematopoietic cell-specific LYN substrate 1                                                                                  | HCLS1     | 0.61     | 0.56     | 1.62     | 0.62     | 0.93       | 0.60 | 8        | 21         | 1.68E-54  |
| Q9Y3S2     | Nucleolar autoantigen 36                                                                                                     | NOA36     |          | 0.93     |          |          | 0.93       |      | 2        | 7.2        | 2.36E-20  |
| Q9Y221-1   | 60S ribosome subunit biogenesis protein NIP7 homolog                                                                         | CGI-37    | 0.93     |          |          |          | 0.93       |      | 2        | 22         | 6.43E-10  |
| Q6UWP2-1   | Dehydrogenase/reductase SDR family member 11                                                                                 | DHRS11    | 0.93     |          |          |          | 0.93       |      | 2        | 8.1        | 6.21E-16  |
| Q7Z6V5-1   | Deaminase domain-containing protein 1                                                                                        | ADAT2     | 0.93     |          |          |          | 0.93       |      | 2        | 22         | 1.18E-07  |
| Q9H8Y5     | Ankyrin repeat and zinc finger domain-containing protein 1                                                                   | ANKZF1    |          | 0.93     |          |          | 0.93       |      | 2        | 3          | 1.47E-02  |
| Q5JSP0-1   | FYVE, RhoGEF and PH domain-containing protein 3                                                                              | FGD3      |          | 0.93     |          |          | 0.93       |      | 2        | 3.2        | 1.56E-04  |
| A8K1Z3     | cDNA FLJ75002, highly similar to Homo sapiens, neural cell expressed, developmentally down-regulated gene 1                  | NEDD1     | 0.93     |          |          |          | 0.93       |      | 2        | 5.8        | 7.38E-172 |
| Q9H0P0-4   | Cytosolic 5-nucleotidase 3                                                                                                   | HSPC233   |          | 0.93     |          |          | 0.93       |      | 2        | 7.4        | 9.74E-23  |
| B7Z2Z4     | cDNA FLJ54352, highly similar to Propionyl-CoA carboxylase beta chain, mitochondrial (EC 6.4.1.3)                            | hCG_15235 | 0.93     |          |          |          | 0.93       |      | 2        | 5.6        | 5.31E-73  |

| UniProt ID | Protein_Name                                                | Gene Name | F1 (L/H) | F2 (L/H) | R1 (H/L) | R1 (L/H) | Mean (T/U) | S.D. | Pep. No. | %Seq. Cov. | PEP       |
|------------|-------------------------------------------------------------|-----------|----------|----------|----------|----------|------------|------|----------|------------|-----------|
| P52657     | General transcription factor IIA subunit 2                  | GTF2A 2   | 0.93     |          |          |          | 0.93       |      | 3        | 22         | 4.48E-23  |
| O75157-1   | TSC22 domain family protein 2                               | KIAA0669  | 0.93     |          |          |          | 0.93       |      | 3        | 6.8        | 2.64E-05  |
| Q5R2V8     | C2orf4 protein                                              | C2orf4    | 0.93     |          |          |          | 0.93       |      | 3        | 17         | 1.63E-08  |
| Q6ULP2-1   | Aftiphilin                                                  | AFTH      | 0.93     |          |          |          | 0.93       |      | 3        | 3.3        | 3.77E-08  |
| Q96JM4-2   | Leucine-rich repeat and IQ domain-containing protein 1      | KIAA1801  | 0.93     |          |          |          | 0.93       |      | 3        | 2.2        | 5.60E-03  |
| B4E040     | cDNA FLJ55177, highly similar to Ras-related protein Ral-B  | RALB      | 0.93     |          |          |          | 0.93       |      | 4        | 15         | 7.05E-15  |
| P22090     | 40S ribosomal protein S4, Y isoform 1                       | PRO2646   | 0.93     |          |          |          | 0.93       |      | 9        | 29         | 1.53E-27  |
| Q8IUI8     | Cytokine receptor-like factor 3                             | CREM E9   | 0.95     | 0.93     | 0.92     | 1.09     | 0.93       | 0.02 | 5        | 17         | 2.28E-24  |
| P50213-1   | Isocitrate dehydrogenase [NAD] subunit alpha, mitochondrial | IDH3A     | 0.92     | 0.96     | 0.92     | 1.09     | 0.93       | 0.02 | 9        | 26         | 8.62E-53  |
| P38606     | Vacuolar ATPase isoform VA68                                | ATP6A 1   | 0.92     | 0.90     | 0.98     | 1.02     | 0.93       | 0.04 | 18       | 35         | 0.00E+00  |
| Q7L2E3-2   | DEAH box protein 30                                         | DDX30     | 0.97     | 0.95     | 0.88     | 1.14     | 0.93       | 0.05 | 22       | 21         | 8.23E-158 |
| Q9BYD6     | 39S ribosomal protein L1, mitochondrial                     | BM-022    | 0.95     | 0.99     | 0.86     | 1.16     | 0.93       | 0.07 | 8        | 30         | 1.05E-81  |
| Q09028     | Chromatin assembly factor 1 subunit C                       | RBAP4 8   | 0.89     | 0.90     | 1.01     | 0.99     | 0.93       | 0.07 | 17       | 62         | 5.83E-103 |
| C9JW58     | Putative uncharacterized protein DENR                       | DENR      | 0.89     | 1.01     | 0.90     | 1.11     | 0.93       | 0.07 | 5        | 25         | 3.87E-85  |
| B0UX85     | HLA-B associated transcript 3                               | BAT3      | 0.94     | 1.01     | 0.85     | 1.18     | 0.93       | 0.08 | 13       | 17         | 4.13E-84  |
| Q29RF7-1   | Cell proliferation-inducing gene 54 protein                 | KIAA0648  | 0.95     | 1.02     | 0.83     | 1.20     | 0.93       | 0.10 | 25       | 27         | 0.00E+00  |
| B1AKJ5     | Nardilysin (N-arginine dibasic convertase)                  | hCG_40292 | 0.97     | 1.01     | 0.82     | 1.22     | 0.93       | 0.10 | 10       | 9.5        | 8.95E-58  |
| P63010-2   | Adapter-related protein complex 2 beta subunit              | ADTB2     | 0.85     | 0.90     | 1.05     | 0.95     | 0.93       | 0.10 | 27       | 36         | 0.00E+00  |
| Q15691     | APC-binding protein EB1                                     | MAPR E1   | 0.87     | 0.87     | 1.06     | 0.94     | 0.93       | 0.11 | 17       | 63         | 1.11E-295 |
| Q99447     | CTP:phosphoethanolamine cytidyltransferase                  | PCYT2     | 1.02     | 0.99     | 0.79     | 1.27     | 0.93       | 0.13 | 2        | 6.7        | 1.03E-49  |
| P17980     | 26S protease regulatory subunit 6A                          | PSMC3     | 1.01     | 1.01     | 0.78     | 1.28     | 0.93       | 0.13 | 15       | 47         | 6.98E-286 |
| Q9UBI1     | COMM domain-containing protein 3                            | BUP       | 0.90     | 0.81     | 1.09     | 0.92     | 0.93       | 0.14 | 5        | 30         | 1.53E-164 |
| P30566-1   | Adenylosuccinase                                            | ADSL      | 1.09     | 0.97     | 0.74     | 1.35     | 0.93       | 0.18 | 11       | 28         | 2.09E-73  |

| UniProt ID | Protein_Name                                                 | Gene Name | F1 (L/H) | F2 (L/H) | R1 (H/L) | R1 (L/H) | Mean (T/U) | S.D. | Pep. No. | %Seq. Cov. | PEP       |
|------------|--------------------------------------------------------------|-----------|----------|----------|----------|----------|------------|------|----------|------------|-----------|
| P07311     | Acylphosphatase, erythrocyte isozyme                         | ACYP1     | 0.85     | 0.81     | 1.14     | 0.88     | 0.93       | 0.18 | 5        | 54         | 4.27E-49  |
| P30520     | Adenylosuccinate synthetase isozyme 2                        | ADSS      | 1.05     | 1.04     | 0.71     | 1.41     | 0.93       | 0.19 | 11       | 28         | 5.83E-138 |
| O60749     | Sorting nexin-2                                              | SNX2      | 0.79     | 0.85     | 1.16     | 0.86     | 0.93       | 0.20 | 13       | 32         | 2.31E-62  |
| P52815     | 39S ribosomal protein L12, mitochondrial                     | MRPL12    | 1.12     | 0.70     | 0.98     | 1.02     | 0.93       | 0.21 | 4        | 11         | 3.50E-34  |
| Q8WUJ0     | Protein tyrosine phosphatase-like protein                    | STYX      | 1.18     | 0.78     | 0.84     | 1.19     | 0.93       | 0.22 | 2        | 14         | 7.81E-28  |
| P23634-1   | Matrix-remodeling-associated protein 1                       | ATP2B2    | 0.75     | 0.86     | 1.19     | 0.84     | 0.93       | 0.23 | 15       | 17         | 2.10E-145 |
| Q96BW5-1   | Parathion hydrolase-related protein                          | PTER      | 0.80     | 0.79     | 1.21     | 0.83     | 0.93       | 0.24 | 5        | 14         | 1.21E-13  |
| Q96EY7-1   | Pentatricopeptide repeat-containing protein 3, mitochondrial | PTCD3     | 0.77     | 0.82     | 1.21     | 0.83     | 0.93       | 0.24 | 2        | 6.1        | 2.74E-32  |
| O94888     | UBX domain-containing protein 7                              | KIAA0794  | 0.73     | 0.87     | 1.20     | 0.83     | 0.93       | 0.24 | 6        | 16         | 9.76E-27  |
| Q5BKZ1-1   | Zinc finger protein 326                                      | ZNF326    | 0.74     | 0.83     | 1.23     | 0.81     | 0.93       | 0.26 | 9        | 16         | 1.70E-78  |
| Q9P2W9     | Cell growth-inhibiting gene 9 protein                        | GIG9      | 1.10     | 1.07     | 0.63     | 1.59     | 0.93       | 0.26 | 3        | 13         | 7.11E-43  |
| A8MWQ4     | Putative uncharacterized protein GLIPR2                      | GLIPR2    | 0.78     | 0.77     | 1.25     | 0.80     | 0.93       | 0.27 | 3        | 28         | 2.95E-68  |
| O14617-5   | Adapter-related protein complex 3 subunit delta-1            | AP3D1     | 0.64     | 1.21     | 0.95     | 1.05     | 0.93       | 0.29 | 5        | 7.2        | 4.21E-55  |
| Q9Y3T9     | NOC2-like protein                                            | NOC2L     | 0.91     | 1.24     | 0.65     | 1.54     | 0.93       | 0.30 | 5        | 6.5        | 1.62E-09  |
| A9CQZ4     | Dihydropyrimidinase-like 2 long form                         | DPYSL2    | 0.76     | 0.75     | 1.29     | 0.78     | 0.93       | 0.31 | 7        | 45         | 6.91E-34  |
| O00425-1   | IGF-II mRNA-binding protein 3                                | IGF2BP3   | 0.75     | 0.70     | 1.35     | 0.74     | 0.93       | 0.36 | 18       | 39         | 3.46E-294 |
| P43246     | DNA mismatch repair protein Msh2                             | MSH2      | 0.91     | 0.96     | 0.93     | 1.08     | 0.93       | 0.03 | 16       | 23         | 5.71E-116 |
| O43617     | BET3 homolog                                                 | BET3      | 1.06     | 1.01     | 0.73     | 1.37     | 0.93       | 0.18 | 4        | 23         | 4.90E-10  |
| Q6PIZ9     | pp29/30                                                      | HSPC062   | 0.68     | 1.19     | 0.93     | 1.08     | 0.93       | 0.26 | 2        | 29         | 1.71E-07  |
| Q96L91-1   | CAG repeat protein 32                                        | CAGH32    | 1.13     |          | 0.74     | 1.35     | 0.94       | 0.28 | 8        | 4.2        | 5.40E-33  |
| B4DQX2     | cDNA FLJ55586, highly similar to MMS19-like protein          | MMS19     | 1.16     |          | 0.71     | 1.41     | 0.94       | 0.32 | 8        | 14         | 6.05E-89  |
| Q96FK6     | WD repeat-containing protein 89                              | C14orf150 |          | 1.17     | 0.70     | 1.43     | 0.94       | 0.33 | 2        | 6.5        | 1.24E-05  |
| Q7L5D6-1   | Conserved edge-expressed protein                             | C7orf20   |          | 0.93     | 0.94     | 1.06     | 0.94       | 0.01 | 2        | 6.1        | 4.12E-09  |
| Q8IZQ5     | Selenoprotein H                                              | C11orf31  | 0.92     | 0.95     |          |          | 0.94       | 0.02 | 3        | 25         | 7.38E-31  |

| UniProt ID | Protein_Name                                                                          | Gene Name | F1 (L/H) | F2 (L/H) | R1 (H/L) | R1 (L/H) | Mean (T/U) | S.D. | Pep. No. | %Seq. Cov. | PEP       |
|------------|---------------------------------------------------------------------------------------|-----------|----------|----------|----------|----------|------------|------|----------|------------|-----------|
| Q9NV35     | 8-oxo-dGTPase NUDT15                                                                  | MTH2      |          | 0.97     | 0.90     | 1.11     | 0.94       | 0.05 | 2        | 16         | 1.06E-08  |
| P62273     | 40S ribosomal protein S29                                                             | RPS29     | 0.88     | 0.99     |          |          | 0.94       | 0.08 | 4        | 59         | 8.41E-05  |
| B4DNB9     | cDNA FLJ53069, highly similar to AP-2 complex subunit mu-1                            | AP2M1     |          | 0.85     | 1.02     | 0.98     | 0.94       | 0.12 | 3        | 5.7        | 2.00E-04  |
| Q2TAA2     | Isoamyl acetate-hydrolyzing esterase 1 homolog                                        | IAH1      | 0.83     |          | 1.04     | 0.96     | 0.94       | 0.15 | 4        | 27         | 5.41E-27  |
| Q14004-2   | CDC2-related protein kinase 5                                                         | CDC2L     |          | 0.82     | 1.05     | 0.95     | 0.94       | 0.16 | 4        | 5          | 2.24E-40  |
| Q9NV70-1   | Exocyst complex component 1                                                           | BM-012    |          | 0.81     | 1.06     | 0.94     | 0.94       | 0.18 | 3        | 4.1        | 5.89E-08  |
| Q9NUL3-1   | Double-stranded RNA-binding protein Staufen homolog 2                                 | STAU2     |          | 1.12     | 0.75     | 1.33     | 0.94       | 0.26 | 6        | 11         | 1.65E-25  |
| Q9NRW7     | Vacuolar protein sorting-associated protein 45                                        | VPS45     | 0.66     |          | 1.21     | 0.83     | 0.94       | 0.39 | 2        | 4.2        | 5.46E-09  |
| P45974-1   | Deubiquitinating enzyme 5                                                             | ISOT      | 0.95     | 0.91     | 0.95     | 1.05     | 0.94       | 0.02 | 20       | 35         | 6.62E-169 |
| Q5T1M5-1   | 133 kDa FK506-binding protein                                                         | FKBP15    | 0.85     | 0.99     | 0.97     | 1.03     | 0.94       | 0.08 | 7        | 10         | 1.40E-93  |
| B4DX78     | ATP-dependent RNA helicase DDX39                                                      | DDX39     | 0.99     | 1.02     | 0.8      | 1.25     | 0.94       | 0.12 | 15       | 33         | 5.42E-63  |
| P50570-1   | Dynamamin-2                                                                           | DNM2      | 0.76     | 0.85     | 1.20     | 0.83     | 0.94       | 0.23 | 22       | 32         | 5.32E-192 |
| Q9H7B4-1   | SET and MYND domain-containing protein 3                                              | SMYD3     | 1.21     | 1.05     | 0.55     | 1.82     | 0.94       | 0.34 | 4        | 11         | 1.29E-18  |
| P30050-1   | 60S ribosomal protein L12                                                             | RPL12     | 0.96     | 0.95     | 0.90     | 1.11     | 0.94       | 0.03 | 7        | 59         | 3.23E-160 |
| A8K3A8     | cDNA FLJ75085, highly similar to Homo sapiens glutaminyl-tRNA synthetase (QARS), mRNA | QARS      | 0.93     | 0.98     | 0.90     | 1.11     | 0.94       | 0.04 | 24       | 35         | 2.78E-223 |
| Q9UNZ2-5   | NSFL1 cofactor p47                                                                    | NSFL1C    | 0.9      | 0.92     | 0.99     | 1.01     | 0.94       | 0.05 | 13       | 43         | 2.64E-273 |
| Q9NRX1     | RNA-binding protein PNO1                                                              | PNO1      | 0.90     | 1.00     | 0.91     | 1.10     | 0.94       | 0.06 | 5        | 23         | 4.42E-76  |
| O95793-1   | Double-stranded RNA-binding protein Staufen homolog 1                                 | STAU      | 0.89     | 0.92     | 1.00     | 1.00     | 0.94       | 0.06 | 6        | 15         | 2.33E-48  |
| Q96QK1     | Maternal-embryonic 3                                                                  | MEM3      | 0.89     | 0.90     | 1.02     | 0.98     | 0.94       | 0.07 | 20       | 32         | 0.00E+00  |
| O15355     | Protein phosphatase 1C                                                                | PPM1C     | 0.90     | 1.02     | 0.89     | 1.12     | 0.94       | 0.07 | 13       | 37         | 1.89E-190 |
| P82650     | 28S ribosomal protein S22, mitochondrial                                              | C3orf5    | 0.87     | 1.02     | 0.92     | 1.09     | 0.94       | 0.08 | 7        | 24         | 5.85E-63  |
| Q9NTJ5     | Phosphatidylinositide                                                                 | KIAA0     | 0.90     | 0.88     | 1.03     | 0.97     | 0.94       | 0.08 | 5        | 9.4        | 5.12E-17  |

| UniProt ID | Protein_Name                                                       | Gene Name | F1 (L/H) | F2 (L/H) | R1 (H/L) | R1 (L/H) | Mean (T/U) | S.D. | Pep. No. | %Seq. Cov. | PEP       |
|------------|--------------------------------------------------------------------|-----------|----------|----------|----------|----------|------------|------|----------|------------|-----------|
|            | phosphatase SAC1                                                   | 851       |          |          |          |          |            |      |          |            |           |
| Q8WWC4     | Uncharacterized protein C2orf47, mitochondrial                     | C2orf47   | 0.85     | 1.02     | 0.94     | 1.06     | 0.94       | 0.09 | 3        | 11         | 1.32E-06  |
| P52788-1   | Spermidine aminopropyltransferase                                  | SMS       | 0.86     | 0.92     | 1.03     | 0.97     | 0.94       | 0.09 | 7        | 33         | 5.14E-47  |
| P06493-1   | Cell division control protein 2 homolog                            | CDC2      | 0.98     | 1.01     | 0.82     | 1.22     | 0.94       | 0.10 | 17       | 66         | 8.49E-165 |
| Q96PU5-8   | E3 ubiquitin-protein ligase NEDD4-like                             | KIAA0439  | 0.97     | 1.02     | 0.82     | 1.22     | 0.94       | 0.10 | 4        | 6.2        | 3.73E-10  |
| Q9NQW7-1   | Aminoacylproline aminopeptidase                                    | XPNPEP1   | 0.85     | 0.90     | 1.06     | 0.94     | 0.94       | 0.11 | 11       | 23         | 1.18E-111 |
| Q9H993     | UPF0364 protein C6orf211                                           | C6orf211  | 0.97     | 0.79     | 1.05     | 0.95     | 0.94       | 0.13 | 4        | 8.2        | 2.91E-33  |
| Q86WV7     | CCDC43 protein                                                     | CCDC43    | 0.81     | 1.09     | 0.91     | 1.10     | 0.94       | 0.14 | 3        | 13         | 4.56E-17  |
| Q13347     | eIF3 p36                                                           | EIF3I     | 1.03     | 1.03     | 0.75     | 1.33     | 0.94       | 0.16 | 16       | 69         | 1.26E-94  |
| A5JGZ4     | Non-functional aryl hydrocarbon receptor interacting protein       | AIP       | 0.88     | 0.81     | 1.12     | 0.89     | 0.94       | 0.16 | 15       | 53         | 2.04E-169 |
| Q9NY94     | Class A basic helix-loop-helix protein 17                          | SCL       | 0.96     | 1.12     | 0.73     | 1.37     | 0.94       | 0.20 | 4        | 15         | 6.65E-12  |
| Q96GG9     | DCN1-like protein 1                                                | DCUN1D1   | 0.80     | 0.84     | 1.17     | 0.85     | 0.94       | 0.20 | 5        | 18         | 5.99E-59  |
| Q9Y478     | 5-AMP-activated protein kinase subunit beta-1                      | AMPK      | 1.23     | 0.79     | 0.79     | 1.27     | 0.94       | 0.25 | 3        | 23         | 1.55E-20  |
| P15311     | Cytovillin                                                         | EZR       | 0.72     | 0.76     | 1.33     | 0.75     | 0.94       | 0.34 | 37       | 55         | 0.00E+00  |
| P99999     | Cytochrome c                                                       | CYC       | 0.93     | 0.95     |          |          | 0.94       | 0.01 | 4        | 32         | 1.30E-15  |
| Q9Y5L0-2   | Importin-12                                                        | IPO12     | 0.93     | 0.97     | 0.92     | 1.09     | 0.94       | 0.03 | 9        | 14         | 4.66E-100 |
| Q9UFC0     | Leucine-rich repeat and WD repeat-containing protein 1             | LRWD1     | 0.96     |          | 0.92     | 1.09     | 0.94       | 0.03 | 4        | 6.4        | 1.68E-24  |
| Q13131-2   | 5-AMP-activated protein kinase catalytic subunit alpha-1           | AMPK1     | 0.94     | 0.90     | 0.98     | 1.02     | 0.94       | 0.04 | 4        | 7.7        | 1.93E-10  |
| O75439     | Beta-MPP                                                           | MPPB      | 0.90     | 0.94     | 0.98     | 1.02     | 0.94       | 0.04 | 10       | 24         | 2.71E-113 |
| Q9H0R4-1   | Haloacid dehalogenase-like hydrolase domain-containing protein 2   | HDHD2     | 0.91     |          | 0.97     | 1.03     | 0.94       | 0.04 | 4        | 17         | 9.69E-61  |
| Q9Y508-1   | RING finger protein 114                                            | RNF114    | 0.95     | 0.98     | 0.89     | 1.12     | 0.94       | 0.05 | 9        | 47         | 1.15E-55  |
| B4DIM0     | cDNA FLJ56442, highly similar to ATP-citrate synthase (EC 2.3.3.8) | ACLY      | 0.92     | 1.00     | 0.90     | 1.11     | 0.94       | 0.05 | 24       | 27         | 1.27E-182 |
| P62424     | 60S ribosomal protein L7a                                          | RPL7A     | 0.97     | 0.99     | 0.86     | 1.16     | 0.94       | 0.07 | 18       | 53         | 4.08E-218 |

| UniProt ID | Protein_Name                                                                                            | Gene Name | F1 (L/H) | F2 (L/H) | R1 (H/L) | R1 (L/H) | Mean (T/U) | S.D. | Pep. No. | %Seq. Cov. | PEP       |
|------------|---------------------------------------------------------------------------------------------------------|-----------|----------|----------|----------|----------|------------|------|----------|------------|-----------|
| Q16204     | Coiled-coil domain-containing protein 6                                                                 | CCDC6     | 0.89     |          | 0.99     | 1.01     | 0.94       | 0.07 | 4        | 7.2        | 5.94E-32  |
| P20585     | Divergent upstream protein                                                                              | DUC1      |          | 0.99     | 0.89     | 1.12     | 0.94       | 0.07 | 3        | 3.3        | 2.86E-05  |
| P18621     | 60S ribosomal protein L17                                                                               | RPL17     | 0.95     | 1.02     | 0.85     | 1.18     | 0.94       | 0.09 | 9        | 42         | 4.80E-102 |
| Q9H2K8     | Cutaneous T-cell lymphoma-associated antigen HD-CL-09                                                   | DPK       | 0.99     | 0.99     | 0.84     | 1.19     | 0.94       | 0.09 | 6        | 7.5        | 3.35E-14  |
| Q9H2J4     | HTPHLP                                                                                                  | PDCL3     | 1.04     | 0.94     | 0.84     | 1.19     | 0.94       | 0.10 | 7        | 35         | 4.03E-66  |
| B9EGG0     | ANO6 protein                                                                                            | ANO6      | 1.00     | 1.00     | 0.82     | 1.22     | 0.94       | 0.10 | 3        | 4.4        | 1.37E-09  |
| O15541     | RING finger protein 113A                                                                                | RNF113    |          | 1.02     | 0.86     | 1.16     | 0.94       | 0.11 | 4        | 15         | 1.30E-12  |
| Q8NC51-1   | PAI1 RNA-binding protein 1                                                                              | CGI-55    | 0.98     | 1.07     | 0.77     | 1.30     | 0.94       | 0.15 | 25       | 57         | 0.00E+00  |
| P53004     | Biliverdin reductase A                                                                                  | BLVR      | 0.86     | 0.83     | 1.13     | 0.88     | 0.94       | 0.17 | 9        | 35         | 6.60E-93  |
| Q969X5-1   | Endoplasmic reticulum-Golgi intermediate compartment protein 1                                          | ERGIC1    |          | 0.82     | 1.06     | 0.94     | 0.94       | 0.17 | 5        | 23         | 2.35E-18  |
| Q13586     | Stromal interaction molecule 1                                                                          | GOK       | 0.73     | 0.96     | 1.13     | 0.88     | 0.94       | 0.20 | 4        | 7.9        | 7.21E-14  |
| O94973-2   | 100 kDa coated vesicle protein C                                                                        | ADTAB     | 0.96     | 0.73     | 1.13     | 0.88     | 0.94       | 0.20 | 13       | 22         | 6.58E-139 |
| O75323     | Glioblastoma-amplified sequence                                                                         | GBAS      | 0.79     | 0.86     | 1.17     | 0.85     | 0.94       | 0.20 | 6        | 23         | 3.43E-31  |
| Q9BW H6-1  | RNA polymerase II-associated protein 1                                                                  | KIAA1403  | 1.19     |          | 0.69     | 1.45     | 0.94       | 0.35 | 4        | 6.2        | 3.20E-33  |
| B3KN28     | cDNA FLJ13370 fis, clone PLACE1000653, highly similar to Phosphoacetylglucosamine mutase (EC 5.4.2.3)   | AGM1      |          |          | 0.94     | 1.06     | 0.94       |      | 2        | 4          | 9.45E-05  |
| Q9BY W2-1  | HIF-1                                                                                                   | HIF1      |          |          | 0.94     | 1.06     | 0.94       |      | 2        | 1          | 1.68E-04  |
| B3KNH5     | cDNA FLJ14622 fis, clone NT2RP2000147, highly similar to Adaptor-related protein complex 1 mu-1 subunit | AP1M1     |          |          | 0.94     | 1.06     | 0.94       |      | 2        | 7.1        | 6.74E-10  |
| Q9P2R6-1   | Arginine-glutamic acid dipeptide repeats protein                                                        | ARG       | 0.94     |          |          |          | 0.94       |      | 2        | 1.6        | 2.64E-02  |
| P37235     | Calcium-binding protein BDR-1                                                                           | BDR1      | 0.94     |          |          |          | 0.94       |      | 2        | 11         | 1.89E-13  |
| P55263-1   | Adenosine 5-phosphotransferase                                                                          | ADK       |          | 0.94     |          |          | 0.94       |      | 2        | 6.4        | 3.39E-03  |
| Q59EV6     | Carrier family 6, member 8 variant                                                                      | hCG_38374 |          | 0.94     |          |          | 0.94       |      | 2        | 4.2        | 4.15E-28  |

| UniProt ID | Protein_Name                                                            | Gene Name    | F1 (L/H) | F2 (L/H) | R1 (H/L) | R1 (L/H) | Mean (T/U) | S.D. | Pep. No. | %Seq. Cov. | PEP       |
|------------|-------------------------------------------------------------------------|--------------|----------|----------|----------|----------|------------|------|----------|------------|-----------|
| B4DG66     | cDNA FLJ61231, highly similar to Apoptosis-stimulating of p53 protein 2 | ASPP2        | 0.94     |          |          |          | 0.94       |      | 2        | 3.3        | 4.41E-09  |
| Q9Y536     | Chromosome 1-amplified sequence 2                                       | COAS2        | 0.94     |          |          |          | 0.94       |      | 3        | 21         | 3.19E-15  |
| Q9NZJ7-1   | Mitochondrial carrier homolog 1                                         | CGI-64       |          | 0.94     |          |          | 0.94       |      | 3        | 7.5        | 2.72E-03  |
| Q9BS14     | GANAB protein                                                           | GANAB        |          | 0.94     |          |          | 0.94       |      | 3        | 8.3        | 2.26E-07  |
| Q9NPA8     | Enhancer of yellow 2 transcription factor homolog                       | DC6          | 0.94     |          |          |          | 0.94       |      | 4        | 44         | 1.13E-33  |
| Q7Z422-1   | Putative MAPK-activating protein PM18/PM20/PM22                         | C1orf144     | 0.94     |          |          |          | 0.94       |      | 4        | 42         | 7.91E-09  |
| O00512     | B-cell CLL/lymphoma 9 protein                                           | BCL9         | 0.94     |          |          |          | 0.94       |      | 5        | 6.1        | 2.50E-24  |
| C9J2K4     | Putative uncharacterized protein ATP6V1F                                | ATP6V1F      | 0.94     |          |          |          | 0.94       |      | 5        | 52         | 3.00E-40  |
| Q15404     | Ras suppressor protein 1                                                | RSP1         | 0.94     |          |          |          | 0.94       |      | 7        | 41         | 3.60E-62  |
| Q9UFY1     | Putative uncharacterized protein DKFZp434N101                           | DKFZp434N101 |          | 0.94     |          |          | 0.94       |      | 8        | 17         | 3.81E-75  |
| Q92541     | RNA polymerase-associated protein RTF1 homolog                          | KIAA0252     | 0.93     | 0.94     | 0.95     | 1.05     | 0.94       | 0.01 | 9        | 13         | 9.41E-57  |
| P62136     | Serine/threonine-protein phosphatase PP1-alpha catalytic subunit        | PPP1A        | 0.95     | 0.92     | 0.95     | 1.05     | 0.94       | 0.02 | 19       | 59         | 0.00E+00  |
| P55209     | NAP-1-related protein                                                   | NAP1L1       | 0.91     | 0.92     | 0.99     | 1.01     | 0.94       | 0.04 | 9        | 29         | 7.15E-117 |
| Q96P70     | Importin-9                                                              | HSPC273      | 0.91     | 0.90     | 1.01     | 0.99     | 0.94       | 0.06 | 6        | 10         | 2.13E-186 |
| Q5JVF3-4   | CSN12-like protein                                                      | HT004        | 0.94     | 0.87     | 1.01     | 0.99     | 0.94       | 0.07 | 4        | 11         | 1.45E-67  |
| Q12769-1   | 160 kDa nucleoporin                                                     | KIAA0197     | 0.89     | 1.04     | 0.89     | 1.12     | 0.94       | 0.09 | 6        | 7          | 2.76E-49  |
| Q92499     | ATP-dependent RNA helicase DDX1                                         | DDX1         | 0.91     | 0.87     | 1.04     | 0.96     | 0.94       | 0.09 | 26       | 43         | 0.00E+00  |
| Q9Y4X5     | H7-AP2                                                                  | ARI          | 0.84     | 1.05     | 0.93     | 1.08     | 0.94       | 0.11 | 2        | 5.7        | 1.33E-62  |
| Q53H29     | Nucleoporin 54kDa variant                                               | NUP54        | 1.07     | 0.86     | 0.89     | 1.12     | 0.94       | 0.11 | 7        | 17         | 5.59E-93  |
| Q9Y3U8     | 60S ribosomal protein L36                                               | RPL36        | 0.97     | 1.05     | 0.80     | 1.25     | 0.94       | 0.13 | 6        | 36         | 3.14E-94  |
| P37802     | SM22-alpha homolog                                                      | CDABP0035    | 0.86     | 0.87     | 1.09     | 0.92     | 0.94       | 0.13 | 19       | 82         | 0.00E+00  |
| Q8WWK9-1   | CTCL tumor antigen se20-10                                              | CKAP2        | 0.83     | 0.90     | 1.09     | 0.92     | 0.94       | 0.13 | 5        | 10         | 1.33E-41  |

| UniProt ID | Protein_Name                                                              | Gene Name | F1 (L/H) | F2 (L/H) | R1 (H/L) | R1 (L/H) | Mean (T/U) | S.D. | Pep. No. | %Seq. Cov. | PEP       |
|------------|---------------------------------------------------------------------------|-----------|----------|----------|----------|----------|------------|------|----------|------------|-----------|
| P55036-2   | 26S proteasome non-ATPase regulatory subunit 4                            | MCB1      | 1.08     | 0.95     | 0.79     | 1.27     | 0.94       | 0.15 | 7        | 20         | 1.26E-57  |
| P14735     | Abeta-degrading protease                                                  | IDE       | 1.02     | 1.05     | 0.75     | 1.33     | 0.94       | 0.17 | 11       | 14         | 1.03E-28  |
| Q9Y6G9     | Cytoplasmic dynein 1 light intermediate chain 1                           | DNCLI1    | 1.03     | 1.05     | 0.74     | 1.35     | 0.94       | 0.17 | 9        | 30         | 6.98E-187 |
| Q10570     | Cleavage and polyadenylation specificity factor 160 kDa subunit           | CPSF1     | 0.98     | 1.12     | 0.72     | 1.39     | 0.94       | 0.20 | 10       | 7.1        | 7.74E-61  |
| P82673-1   | 28S ribosomal protein S28, mitochondrial                                  | HDCMD11P  | 0.86     | 0.74     | 1.22     | 0.82     | 0.94       | 0.25 | 5        | 21         | 7.76E-57  |
| Q7Z4H7-1   | HAUS augmin-like complex subunit 6                                        | DGT6      | 0.79     | 0.80     | 1.23     | 0.81     | 0.94       | 0.25 | 3        | 4          | 4.05E-14  |
| Q96KA5-1   | Cisplatin resistance-related protein 9                                    | CLPTM1L   | 1.12     |          | 0.76     | 1.32     | 0.94       | 0.25 | 3        | 5.2        | 5.81E-29  |
| Q8N488     | Apoptin-associating protein 1                                             | DEDAF     | 0.84     | 0.72     | 1.26     | 0.79     | 0.94       | 0.28 | 2        | 18         | 2.74E-66  |
| Q08170     | Pre-mRNA-splicing factor SRP75                                            | SFRS4     | 0.74     | 0.78     | 1.30     | 0.77     | 0.94       | 0.31 | 12       | 23         | 3.23E-153 |
| Q14781-1   | Chromobox protein homolog 2                                               | CBX2      | 0.91     | 0.63     | 1.28     | 0.78     | 0.94       | 0.33 | 2        | 4.9        | 2.00E-10  |
| O14974-1   | Myosin phosphatase-targeting subunit 1                                    | MBS       | 0.70     | 0.76     | 1.36     | 0.74     | 0.94       | 0.36 | 23       | 23         | 1.52E-264 |
| Q9H7P9-1   | Pleckstrin homology domain-containing family G member 2                   | PLEKHG2   | 0.99     | 1.02     | 0.82     | 1.22     | 0.94       | 0.11 | 3        | 3.2        | 6.84E-05  |
| Q641Q2-1   | WASH complex subunit FAM21A                                               | FAM21A    | 0.88     | 1.13     | 0.82     | 1.22     | 0.94       | 0.16 | 9        | 11         | 5.94E-101 |
| Q92917     | G patch domain and KOW motifs-containing protein                          | GPATC5    | 0.93     | 0.95     | 0.95     | 1.05     | 0.94       | 0.01 | 6        | 22         | 1.24E-53  |
| P28340     | DNA polymerase delta catalytic subunit                                    | POLD      | 0.93     | 0.93     | 0.97     | 1.03     | 0.94       | 0.02 | 19       | 26         | 4.30E-102 |
| Q13547     | Histone deacetylase 1                                                     | HDAC1     | 0.92     | 0.94     | 0.97     | 1.03     | 0.94       | 0.03 | 15       | 43         | 1.09E-115 |
| O75489     | Complex I-30kD                                                            | NDUFS3    | 0.98     | 0.97     | 0.88     | 1.14     | 0.94       | 0.06 | 12       | 52         | 4.33E-216 |
| B4DJV9     | cDNA FLJ60607, highly similar to Acyl-protein thioesterase 1 (EC 3.1.2.-) | APT1      | 0.93     | 1.01     | 0.89     | 1.12     | 0.94       | 0.06 | 6        | 36         | 2.13E-83  |
| Q9NRX4     | 14 kDa phosphohistidine phosphatase                                       | CGI-202   | 0.95     | 0.87     | 1.01     | 0.99     | 0.94       | 0.07 | 2        | 22         | 4.78E-15  |
| Q92878-2   | DNA repair protein RAD50                                                  | RAD50     | 0.86     | 0.98     | 0.99     | 1.01     | 0.94       | 0.07 | 16       | 13         | 4.92E-223 |
| Q9Y230     | 48 kDa TATA box-binding protein-interacting protein                       | CGI-46    | 0.99     | 0.98     | 0.86     | 1.16     | 0.94       | 0.07 | 18       | 43         | 4.50E-171 |
| Q9BXW7-1   | Cat eye syndrome critical region protein                                  | CECR5     | 1.01     | 0.96     | 0.86     | 1.16     | 0.94       | 0.08 | 10       | 32         | 2.25E-71  |



| UniProt ID | Protein_Name                                                      | Gene Name | F1 (L/H) | F2 (L/H) | R1 (H/L) | R1 (L/H) | Mean (T/U) | S.D. | Pep. No. | %Seq. Cov. | PEP       |
|------------|-------------------------------------------------------------------|-----------|----------|----------|----------|----------|------------|------|----------|------------|-----------|
|            | 5                                                                 |           |          |          |          |          |            |      |          |            |           |
| Q9ULR0-1   | Pre-mRNA-splicing factor ISY1 homolog                             | ISY1      | 0.86     | 0.94     | 1.03     | 0.97     | 0.94       | 0.09 | 4        | 17         | 1.06E-170 |
| Q9P0I2-1   | Transmembrane protein 111                                         | TMEM111   | 0.91     | 1.04     | 0.88     | 1.14     | 0.94       | 0.09 | 2        | 12         | 2.83E-21  |
| Q9H0C8     | Integrin-linked kinase-associated serine/threonine phosphatase 2C | ILKAP     | 0.85     | 0.96     | 1.02     | 0.98     | 0.94       | 0.09 | 9        | 27         | 1.96E-69  |
| Q13505-1   | Metaxin-1                                                         | MTX       | 0.97     | 1.02     | 0.84     | 1.19     | 0.94       | 0.09 | 6        | 18         | 7.00E-44  |
| O75431     | Metaxin-2                                                         | MTX2      | 0.83     | 1.01     | 0.99     | 1.01     | 0.94       | 0.10 | 7        | 33         | 1.18E-102 |
| P62879     | G protein subunit beta-2                                          | GNB2      | 0.91     | 0.86     | 1.06     | 0.94     | 0.94       | 0.10 | 10       | 41         | 1.29E-45  |
| Q9Y333     | Small nuclear ribonuclear protein D homolog                       | C6orf28   | 1.05     | 0.94     | 0.84     | 1.19     | 0.94       | 0.11 | 5        | 60         | 5.97E-78  |
| P52565     | Rho GDP-dissociation inhibitor 1                                  | ARHGDI1   | 0.84     | 0.86     | 1.13     | 0.88     | 0.94       | 0.16 | 8        | 27         | 3.84E-120 |
| Q9UEU0-1   | Vesicle transport through interaction with t-SNAREs homolog 1B    | VTI1      | 1.06     | 1.03     | 0.74     | 1.35     | 0.94       | 0.18 | 3        | 18         | 1.09E-49  |
| O43148-2   | mRNA (guanine-N(7)-methyltransferase                              | KIAA0398  | 1.10     | 0.75     | 0.98     | 1.02     | 0.94       | 0.18 | 3        | 7.5        | 5.24E-45  |
| Q9Y6C9     | Met-induced mitochondrial protein                                 | HSPC032   | 1.06     | 1.06     | 0.71     | 1.41     | 0.94       | 0.20 | 5        | 19         | 1.93E-40  |
| P40939     | 78 kDa gastrin-binding protein                                    | HADH      | 0.77     | 0.75     | 1.31     | 0.76     | 0.94       | 0.32 | 21       | 36         | 0.00E+00  |
| Q8N4V1-2   | Membrane magnesium transporter 1                                  | MMGT1     | 1.07     | 1.22     | 0.54     | 1.85     | 0.94       | 0.36 | 2        | 18         | 3.66E-26  |
| Q96I99     | GTP-specific succinyl-CoA synthetase subunit beta                 | SUCLG2    | 0.74     | 0.72     | 1.37     | 0.73     | 0.94       | 0.37 | 7        | 19         | 1.17E-79  |
| O43719     | HIV Tat-specific factor 1                                         | HTATSF1   | 0.72     | 0.69     | 1.42     | 0.70     | 0.94       | 0.41 | 17       | 26         | 1.37E-124 |
| O15498     | Synaptobrevin homolog YKT6                                        | YKT6      | 1.11     | 1.28     | 0.44     | 2.27     | 0.94       | 0.44 | 3        | 13         | 2.78E-11  |
| O95466-2   | CLL-associated antigen KW-13                                      | C17orf1   | 0.62     | 0.68     | 1.53     | 0.65     | 0.94       | 0.51 | 21       | 20         | 1.27E-209 |
| Q9H9A6     | Leucine-rich repeat-containing protein 40                         | LRRC40    | 1.14     | 0.75     |          |          | 0.95       | 0.28 | 3        | 7.3        | 1.01E-08  |
| Q9H0L4     | CF-1 64 kDa subunit tau variant                                   | CSTF2T    |          | 1.17     | 0.72     | 1.39     | 0.95       | 0.32 | 5        | 13         | 3.07E-15  |
| P35754     | Glutaredoxin-1                                                    | GLRX      | 0.70     |          | 1.19     | 0.84     | 0.95       | 0.35 | 3        | 43         | 5.79E-31  |
| Q9Y3A3-1   | 2C4D                                                              | CGI-95    | 0.96     | 0.93     |          |          | 0.95       | 0.02 | 5        | 37         | 1.14E-09  |
| Q96PM5-1   | Androgen receptor N-terminal-interacting protein                  | ARNIP     | 0.91     |          | 0.98     | 1.02     | 0.95       | 0.05 | 2        | 8.4        | 3.13E-20  |
| Q9NQT4     | Chronic myelogenous leukemia tumor                                | CML28     | 0.98     |          | 0.91     | 1.10     | 0.95       | 0.05 | 5        | 25         | 3.34E-39  |

| UniProt ID | Protein_Name                                                     | Gene Name | F1 (L/H) | F2 (L/H) | R1 (H/L) | R1 (L/H) | Mean (T/U) | S.D. | Pep. No. | %Seq. Cov. | PEP       |
|------------|------------------------------------------------------------------|-----------|----------|----------|----------|----------|------------|------|----------|------------|-----------|
|            | antigen 28                                                       |           |          |          |          |          |            |      |          |            |           |
| P02686-1   | Myelin A1 protein                                                | MBP       |          | 0.81     | 1.08     | 0.93     | 0.95       | 0.19 | 2        | 15         | 8.44E-19  |
| B4E175     | cDNA FLJ54775, highly similar to Syntaxin-binding protein 2      | STXBP2    |          | 1.08     | 0.81     | 1.23     | 0.95       | 0.19 | 5        | 11         | 7.21E-67  |
| C9IZQ1     | Putative uncharacterized protein SSR1                            | SSR1      | 0.96     | 0.94     | 0.94     | 1.06     | 0.95       | 0.01 | 3        | 11         | 2.23E-78  |
| P12081     | Histidine--tRNA ligase                                           | HARS      | 0.93     | 0.94     | 0.97     | 1.03     | 0.95       | 0.02 | 17       | 38         | 2.40E-186 |
| Q99653     | Calcineurin B homolog                                            | CHP       | 0.97     | 0.93     | 0.94     | 1.06     | 0.95       | 0.02 | 6        | 38         | 1.87E-45  |
| P61163     | Actin-RPV                                                        | ACTR1A    | 0.93     | 0.93     | 0.98     | 1.02     | 0.95       | 0.03 | 11       | 41         | 6.20E-208 |
| P62917     | 60S ribosomal protein L8                                         | RPL8      | 0.97     | 0.96     | 0.91     | 1.10     | 0.95       | 0.03 | 12       | 42         | 8.06E-91  |
| Q9Y3B4     | Pre-mRNA branch site protein p14                                 | CGI110    | 0.94     | 0.99     | 0.91     | 1.10     | 0.95       | 0.04 | 5        | 46         | 6.83E-123 |
| Q5JWF2-1   | Adenylate cyclase-stimulating G alpha protein                    | GNAS      | 0.97     | 0.89     | 0.98     | 1.02     | 0.95       | 0.05 | 9        | 12         | 7.88E-130 |
| P47755     | F-actin-capping protein subunit alpha-2                          | CAPZA2    | 0.92     | 0.91     | 1.01     | 0.99     | 0.95       | 0.06 | 8        | 42         | 4.29E-38  |
| Q9BRX2     | Protein pelota homolog                                           | CGI-17    | 0.87     | 1.00     | 0.97     | 1.03     | 0.95       | 0.07 | 5        | 11         | 4.75E-56  |
| P82930     | 28S ribosomal protein S34, mitochondrial                         | MRPS34    | 0.87     | 0.95     | 1.02     | 0.98     | 0.95       | 0.08 | 5        | 33         | 8.52E-20  |
| Q13242     | Pre-mRNA-splicing factor SRp30C                                  | SFRS9     | 0.88     | 0.91     | 1.05     | 0.95     | 0.95       | 0.09 | 14       | 55         | 1.24E-87  |
| P18077     | 60S ribosomal protein L35a                                       | GIG33     | 0.99     | 1.01     | 0.84     | 1.19     | 0.95       | 0.09 | 5        | 34         | 1.27E-11  |
| Q9H1E3-1   | Nuclear ubiquitous casein and cyclin-dependent kinases substrate | JC7       | 0.99     | 1.02     | 0.83     | 1.20     | 0.95       | 0.10 | 10       | 42         | 1.43E-66  |
| P62333     | 26S protease regulatory subunit 10B                              | PSMC6     | 1.05     | 0.95     | 0.84     | 1.19     | 0.95       | 0.11 | 16       | 45         | 2.20E-113 |
| O60763     | General vesicular transport factor p115                          | USO1      | 0.89     | 0.88     | 1.07     | 0.93     | 0.95       | 0.11 | 20       | 28         | 6.70E-251 |
| O60502-1   | Beta-hexosaminidase                                              | HEXC      | 0.83     | 1.04     | 0.97     | 1.03     | 0.95       | 0.11 | 4        | 4.1        | 2.07E-05  |
| P00387-1   | Diaphorase-1                                                     | CYB5R3    | 0.86     | 0.91     | 1.07     | 0.93     | 0.95       | 0.11 | 6        | 27         | 9.54E-152 |
| Q13561     | 50 kDa dynein-associated polypeptide                             | DCTN2     | 0.88     | 0.88     | 1.08     | 0.93     | 0.95       | 0.12 | 10       | 28         | 4.99E-153 |
| Q7L014     | DEAD box protein 46                                              | DDX46     | 0.84     | 0.92     | 1.08     | 0.93     | 0.95       | 0.12 | 25       | 25         | 1.60E-152 |
| Q96S59-1   | BPM90                                                            | RANBP9    | 0.85     | 1.09     | 0.90     | 1.11     | 0.95       | 0.13 | 4        | 7.3        | 5.51E-25  |
| O15126-1   | Secretory carrier-associated membrane                            | SCAMP     | 0.80     | 1.04     | 1.00     | 1.00     | 0.95       | 0.13 | 2        | 11         | 9.77E-22  |

| UniProt ID | Protein_Name                                                                                          | Gene Name | F1 (L/H) | F2 (L/H) | R1 (H/L) | R1 (L/H) | Mean (T/U) | S.D. | Pep. No. | %Seq. Cov. | PEP       |
|------------|-------------------------------------------------------------------------------------------------------|-----------|----------|----------|----------|----------|------------|------|----------|------------|-----------|
|            | protein 1                                                                                             |           |          |          |          |          |            |      |          |            |           |
| Q96CW5-1   | Gamma-ring complex protein 104 kDa                                                                    | GCP3      | 0.80     | 0.98     | 1.06     | 0.94     | 0.95       | 0.13 | 6        | 8.7        | 1.86E-82  |
| P23743-1   | 80 kDa diacylglycerol kinase                                                                          | DAGK      | 1.04     | 1.01     | 0.79     | 1.27     | 0.95       | 0.14 | 6        | 13         | 1.59E-71  |
| O60256     | 41 kDa phosphoribosylpyrophosphate synthetase-associated protein                                      | PRPSA P2  | 0.95     | 0.80     | 1.09     | 0.92     | 0.95       | 0.15 | 10       | 38         | 2.32E-227 |
| B3KTC7     | cDNA FLJ38069 fis, clone CTONG2015434, highly similar to DOUBLE-STRAND BREAK REPAIR PROTEIN MRE11A    | HNGS1     | 0.86     | 0.86     | 1.12     | 0.89     | 0.95       | 0.15 | 5        | 9.1        | 2.44E-74  |
| Q96FV9-1   | Nuclear matrix protein p84                                                                            | HPR1      | 0.84     | 0.88     | 1.12     | 0.89     | 0.95       | 0.15 | 8        | 13         | 5.70E-69  |
| P52888     | Endopeptidase 24.15                                                                                   | THOP1     | 0.80     | 0.93     | 1.11     | 0.90     | 0.95       | 0.16 | 15       | 29         | 3.43E-140 |
| Q8IZL8-2   | Modulator of non-genomic activity of estrogen receptor                                                | HMX3      | 0.98     | 1.11     | 0.75     | 1.33     | 0.95       | 0.18 | 5        | 5.9        | 1.10E-85  |
| O00629     | Importin alpha Q1                                                                                     | KPNA4     | 0.78     | 0.90     | 1.16     | 0.86     | 0.95       | 0.19 | 5        | 15         | 1.66E-83  |
| B4DLZ8     | cDNA FLJ55789, highly similar to Rattus norvegicus basic leucine zipper and W2 domains 1 (Bzw1), mRNA | BZAP4 5   | 1.05     | 1.07     | 0.72     | 1.39     | 0.95       | 0.20 | 8        | 17         | 1.81E-91  |
| Q5SSJ5-1   | Heterochromatin protein 1-binding protein 3                                                           | HP1BP 3   | 0.78     | 0.87     | 1.19     | 0.84     | 0.95       | 0.22 | 19       | 39         | 9.05E-129 |
| Q9BVA1     | Tubulin beta-2B chain                                                                                 | TUBB2 B   | 1.16     | 0.71     | 0.97     | 1.03     | 0.95       | 0.23 | 22       | 63         | 0.00E+00  |
| P62979     | 40S ribosomal protein S27a                                                                            | RPS27 A   | 0.99     | 1.16     | 0.69     | 1.45     | 0.95       | 0.24 | 12       | 64         | 1.83E-206 |
| P10155-1   | 60 kDa SS-A/Ro ribonucleoprotein                                                                      | RO60      | 0.81     | 0.78     | 1.25     | 0.80     | 0.95       | 0.26 | 2        | 4.5        | 3.47E-16  |
| P11387     | DNA topoisomerase 1                                                                                   | TOP1      | 0.77     | 0.82     | 1.25     | 0.80     | 0.95       | 0.26 | 29       | 35         | 4.20E-127 |
| P28715-1   | DNA excision repair protein ERCC-5                                                                    | ERCC5     | 0.71     | 1.26     | 0.87     | 1.15     | 0.95       | 0.28 | 7        | 9.5        | 1.15E-36  |
| P11171-1   | Band 4.1                                                                                              | E41P      | 0.62     | 0.78     | 1.44     | 0.69     | 0.95       | 0.43 | 2        | 3.1        | 1.31E-22  |
| B3KQ79     | B-cell receptor-associated protein 31, isoform CRA_b                                                  | BCAP3 1   | 0.91     | 1.00     | 0.93     | 1.08     | 0.95       | 0.05 | 11       | 22         | 1.10E-27  |
| Q9C0J8     | WD repeat-containing protein 33                                                                       | WDC14 6   | 0.95     | 1.08     | 0.81     | 1.23     | 0.95       | 0.14 | 6        | 7.3        | 9.81E-11  |
| Q0VDF9     | Heat shock 70 kDa protein 14                                                                          | HSP70     | 1.05     | 1.02     | 0.77     | 1.30     | 0.95       | 0.15 | 8        | 22         | 7.45E-27  |
| P17812     | CTP synthase 1                                                                                        | CTPS      | 0.97     | 0.93     | 0.95     | 1.05     | 0.95       | 0.02 | 20       | 38         | 2.88E-166 |
| Q9H5V      | UPF0428 protein                                                                                       | CXorf5    | 0.90     | 0.96     | 0.99     | 1.01     | 0.95       | 0.05 | 4        | 17         | 4.50E-41  |

| UniProt ID | Protein_Name                                                                  | Gene Name | F1 (L/H) | F2 (L/H) | R1 (H/L) | R1 (L/H) | Mean (T/U) | S.D. | Pep. No. | %Seq. Cov. | PEP       |
|------------|-------------------------------------------------------------------------------|-----------|----------|----------|----------|----------|------------|------|----------|------------|-----------|
| 9          | CXorf56                                                                       | 6         |          |          |          |          |            |      |          |            |           |
| Q3MH D2-2  | Protein LSM12 homolog                                                         | LSM12     | 0.90     | 1.00     | 0.95     | 1.05     | 0.95       | 0.05 | 3        | 18         | 3.73E-21  |
| Q8IY81     | Protein ftsJ homolog 3                                                        | FTSJ3     | 0.95     | 1.06     | 0.84     | 1.19     | 0.95       | 0.11 | 18       | 28         | 7.01E-231 |
| Q9UBF 2    | Coatomer subunit gamma-2                                                      | COPG2     | 0.97     | 0.83     | 1.05     | 0.95     | 0.95       | 0.11 | 13       | 20         | 1.34E-217 |
| Q13813 -1  | Alpha-II spectrin                                                             | SPTA2     | 0.83     | 0.89     | 1.13     | 0.88     | 0.95       | 0.16 | ##       | 67         | 0.00E+00  |
| P68402     | PAF acetylhydrolase 30 kDa subunit                                            | PAFAH 1B2 | 0.88     | 0.79     | 1.18     | 0.85     | 0.95       | 0.20 | 6        | 38         | 1.07E-54  |
| B4DPJ2     | cDNA FLJ51518, highly similar to Annexin A11                                  | ANX11     | 0.83     | 0.83     | 1.19     | 0.84     | 0.95       | 0.21 | 11       | 31         | 5.10E-113 |
| A6ZJA4     | Bromodomain containing 1                                                      | BRD1      | 0.62     | 0.55     | 1.68     | 0.60     | 0.95       | 0.63 | 4        | 3.2        | 3.08E-06  |
| Q9H3S7     | His domain-containing protein tyrosine phosphatase                            | KIAA1 471 |          | 0.94     | 0.96     | 1.04     | 0.95       | 0.01 | 6        | 6.2        | 1.48E-78  |
| Q5T200 -1  | Zinc finger CCCH domain-containing protein 13                                 | KIAA0 853 |          | 0.96     | 0.94     | 1.06     | 0.95       | 0.01 | 3        | 2.6        | 3.12E-07  |
| P42566-1   | Epidermal growth factor receptor substrate 15                                 | AF1P      |          | 0.92     | 0.98     | 1.02     | 0.95       | 0.04 | 5        | 6          | 7.50E-37  |
| O75818 -1  | Ribonuclease P protein subunit p40                                            | RNASE P1  | 0.91     |          | 0.99     | 1.01     | 0.95       | 0.06 | 2        | 11         | 6.86E-05  |
| Q00169     | Phosphatidylinositol transfer protein alpha isoform                           | PITPN     | 0.86     |          | 1.04     | 0.96     | 0.95       | 0.13 | 6        | 26         | 3.69E-43  |
| P04844     | Dolichyl-diphosphooligosaccharide--protein glycosyltransferase 63 kDa subunit | RPN2      | 1.07     |          | 0.83     | 1.20     | 0.95       | 0.17 | 9        | 29         | 1.11E-168 |
| Q13564     | Amyloid beta precursor protein-binding protein 1, 59 kDa                      | APPBP 1   | 0.76     |          | 1.14     | 0.88     | 0.95       | 0.27 | 9        | 28         | 3.55E-137 |
| O75376 -1  | Nuclear receptor corepressor 1                                                | KIAA1 047 | 0.69     |          | 1.21     | 0.83     | 0.95       | 0.37 | 6        | 3.6        | 2.17E-46  |
| Q6ZNJ1 -1  | Neurobeachin-like protein 2                                                   | KIAA0 540 | 1.22     |          | 0.68     | 1.47     | 0.95       | 0.38 | 8        | 4.4        | 2.62E-56  |
| Q9BV6 8-1  | RING finger protein 126                                                       | RNF12 6   |          |          | 0.95     | 1.05     | 0.95       |      | 2        | 6.4        | 7.88E-04  |
| O15269     | Long chain base biosynthesis protein 1                                        | LCB1      |          | 0.95     |          |          | 0.95       |      | 2        | 4          | 9.82E-04  |
| Q14554     | Protein disulfide isomerase-related protein                                   | PDIA5     | 0.95     |          |          |          | 0.95       |      | 2        | 4.4        | 3.41E-03  |
| Q9HAB 8    | Phosphopantothenate--cysteine ligase                                          | COAB      |          | 0.95     |          |          | 0.95       |      | 3        | 9          | 7.09E-07  |
| P18859     | ATP synthase-coupling factor 6,                                               | ATP6      | 0.95     |          |          |          | 0.95       |      | 3        | 25         | 4.47E-39  |

| UniProt ID | Protein_Name                                                                 | Gene Name | F1 (L/H) | F2 (L/H) | R1 (H/L) | R1 (L/H) | Mean (T/U) | S.D. | Pep. No. | %Seq. Cov. | PEP       |
|------------|------------------------------------------------------------------------------|-----------|----------|----------|----------|----------|------------|------|----------|------------|-----------|
|            | mitochondrial                                                                |           |          |          |          |          |            |      |          |            |           |
| A8MSZ6     | Putative uncharacterized protein TAF9                                        | hCG_37060 | 0.95     |          |          |          | 0.95       |      | 4        | 29         | 5.14E-07  |
| P35249     | Activator 1 37 kDa subunit                                                   | RFC4      | 0.94     | 0.93     | 0.98     | 1.02     | 0.95       | 0.03 | 17       | 49         | 2.64E-269 |
| P68104     | Elongation factor 1-alpha 1                                                  | EEF1A     | 0.98     | 0.97     | 0.90     | 1.11     | 0.95       | 0.04 | 26       | 59         | 0.00E+00  |
| B4E1G6     | cDNA FLJ56840, highly similar to Galactokinase (EC 2.7.1.6)                  | GALK1     | 0.94     | 1.00     | 0.91     | 1.10     | 0.95       | 0.05 | 12       | 38         | 7.88E-69  |
| Q9BW71-1   | HIRA-interacting protein 3                                                   | HIRIP3    | 0.95     | 0.90     | 1.00     | 1.00     | 0.95       | 0.05 | 6        | 14         | 4.19E-65  |
| P55786     | Puromycin-sensitive aminopeptidase                                           | NPEPPS    | 0.89     | 1.00     | 0.96     | 1.04     | 0.95       | 0.06 | 13       | 20         | 2.80E-133 |
| A6NDG6     | Phosphoglycolate phosphatase                                                 | PGP       | 0.94     | 1.03     | 0.88     | 1.14     | 0.95       | 0.08 | 7        | 29         | 1.53E-77  |
| Q9NRN7     | 4-phosphopantetheinyl transferase                                            | AASDHPPT  | 0.99     | 1.03     | 0.83     | 1.20     | 0.95       | 0.11 | 9        | 36         | 6.50E-109 |
| P38432     | Coilin                                                                       | CLN80     | 0.80     | 1.02     | 1.03     | 0.97     | 0.95       | 0.13 | 6        | 14         | 5.99E-47  |
| Q8TCJ2     | Dolichyl-diphosphooligosaccharide--protein glycosyltransferase subunit STT3B | SIMP      | 0.80     | 1.07     | 0.98     | 1.02     | 0.95       | 0.14 | 11       | 14         | 5.74E-44  |
| P50750-2   | Cell division cycle 2-like protein kinase 4                                  | CDC2L4    | 0.80     | 0.95     | 1.10     | 0.91     | 0.95       | 0.15 | 12       | 22         | 2.42E-148 |
| Q9NYB0     | Telomeric repeat-binding factor 2-interacting protein 1                      | PP8000    | 0.92     | 1.12     | 0.81     | 1.23     | 0.95       | 0.16 | 6        | 23         | 2.76E-90  |
| Q96EY4     | UPF0534 protein C4orf43                                                      | C4orf43   | 1.00     | 1.08     | 0.77     | 1.30     | 0.95       | 0.16 | 6        | 31         | 2.30E-30  |
| P06753-2   | Gamma-tropomyosin                                                            | TPM3      | 0.77     | 0.91     | 1.17     | 0.85     | 0.95       | 0.20 | 28       | 73         | 0.00E+00  |
| O75175-1   | CCR4-associated factor 3                                                     | CNOT3     | 1.20     | 0.86     | 0.79     | 1.27     | 0.95       | 0.22 | 3        | 6.1        | 1.95E-72  |
| Q13283     | ATP-dependent DNA helicase VIII                                              | G3BP      | 1.11     | 1.10     | 0.64     | 1.56     | 0.95       | 0.27 | 14       | 41         | 1.68E-169 |
| Q92882     | Osteoclast-stimulating factor 1                                              | OSTF1     | 0.78     | 0.77     | 1.30     | 0.77     | 0.95       | 0.30 | 8        | 47         | 1.91E-122 |
| Q13951-1   | Core-binding factor subunit beta, isoform 1                                  | CBFB      | 0.76     | 0.75     | 1.34     | 0.75     | 0.95       | 0.34 | 7        | 43         | 3.29E-110 |
| Q9HD33-1   | 39S ribosomal protein L47, mitochondrial                                     | CGI-204   | 0.65     | 0.65     | 1.55     | 0.65     | 0.95       | 0.52 | 5        | 21         | 8.54E-16  |
| P41227     | N-alpha-acetyltransferase 10, NatA catalytic subunit                         | NAA10     | 1        | 1.07     | 0.78     | 1.28     | 0.95       | 0.15 | 9        | 48         | 6.72E-40  |
| Q9Y520-7   | BAT2 domain-containing protein 1                                             | BAT2D1    | 1.03     | 1.12     | 0.70     | 1.43     | 0.95       | 0.22 | 21       | 9.8        | 2.70E-100 |
| Q99543-1   | DnaJ homolog subfamily C member 2                                            | DNAJC2    | 1.07     | 1.12     | 0.66     | 1.52     | 0.95       | 0.25 | 15       | 30         | 1.38E-81  |

| UniProt ID | Protein_Name                                                     | Gene Name | F1 (L/H) | F2 (L/H) | R1 (H/L) | R1 (L/H) | Mean (T/U) | S.D. | Pep. No. | %Seq. Cov. | PEP       |
|------------|------------------------------------------------------------------|-----------|----------|----------|----------|----------|------------|------|----------|------------|-----------|
| Q12834     | Cell division cycle protein 20 homolog                           | CDC20     | 0.99     | 1.15     | 0.72     | 1.39     | 0.95       | 0.22 | 4        | 8          | 1.87E-24  |
| Q10713     | Alpha-MPP                                                        | INPP5E    | 0.94     | 0.97     | 0.95     | 1.05     | 0.95       | 0.02 | 9        | 22         | 8.15E-53  |
| O14979-1   | AU-rich element RNA-binding factor                               | HNRPD L   | 0.94     | 0.94     | 0.98     | 1.02     | 0.95       | 0.02 | 14       | 32         | 1.98E-235 |
| Q08379-2   | 130 kDa cis-Golgi matrix protein                                 | GOLG A2   | 0.93     | 0.95     | 0.98     | 1.02     | 0.95       | 0.03 | 7        | 7.8        | 3.63E-58  |
| Q01469     | Epidermal-type fatty acid-binding protein                        | FABP5     | 0.99     | 0.95     | 0.92     | 1.09     | 0.95       | 0.04 | 11       | 69         | 1.80E-222 |
| P62906     | 60S ribosomal protein L10a                                       | NEDD6     | 0.94     | 1.00     | 0.92     | 1.09     | 0.95       | 0.04 | 12       | 43         | 3.21E-111 |
| Q9Y3B9     | Ribosomal RNA-processing protein 15                              | CGI-115   | 0.99     | 0.98     | 0.89     | 1.12     | 0.95       | 0.06 | 5        | 18         | 1.12E-83  |
| P62195     | 26S protease regulatory subunit 8                                | PSMC5     | 0.95     | 1.01     | 0.90     | 1.11     | 0.95       | 0.06 | 16       | 53         | 0.00E+00  |
| Q9BXJ9-1   | Gastric cancer antigen Ga19                                      | GA19      | 1.00     | 0.97     | 0.89     | 1.12     | 0.95       | 0.06 | 25       | 28         | 6.81E-125 |
| O95235     | Kinesin-like protein KIF20A                                      | KIF20A    | 1.01     | 0.98     | 0.87     | 1.15     | 0.95       | 0.07 | 7        | 9.7        | 2.27E-67  |
| A8MW D3    | Putative uncharacterized protein EIF3D                           | EIF3D     | 1.04     | 0.92     | 0.90     | 1.11     | 0.95       | 0.08 | 14       | 37         | 9.85E-146 |
| P61011     | Signal recognition particle 54 kDa protein                       | SRP54     | 0.98     | 0.86     | 1.02     | 0.98     | 0.95       | 0.08 | 9        | 24         | 1.52E-61  |
| Q8IXB1-1   | DnaJ homolog subfamily C member 10                               | DNAJC 10  | 0.91     | 1.05     | 0.90     | 1.11     | 0.95       | 0.08 | 3        | 3.8        | 2.38E-07  |
| O76071     | Probable cytosolic iron-sulfur protein assembly protein CIAO1    | CIAO1     | 0.85     | 1.03     | 0.98     | 1.02     | 0.95       | 0.09 | 4        | 15         | 8.34E-24  |
| Q96C19     | EF-hand domain-containing protein D2                             | EFHD2     | 0.97     | 1.04     | 0.85     | 1.18     | 0.95       | 0.10 | 11       | 40         | 8.20E-96  |
| O00410-3   | Importin subunit beta-3                                          | IPO5      | 1.00     | 1.02     | 0.84     | 1.19     | 0.95       | 0.10 | 39       | 50         | 0.00E+00  |
| P36578     | 60S ribosomal protein L1                                         | RPL1      | 1.01     | 1.03     | 0.82     | 1.22     | 0.95       | 0.12 | 26       | 52         | 1.48E-224 |
| P62847-1   | 40S ribosomal protein S24                                        | RPS24     | 1.11     | 0.93     | 0.82     | 1.22     | 0.95       | 0.15 | 4        | 16         | 3.47E-73  |
| P62873     | Guanine nucleotide-binding protein G(I)/G(S)/G(T) subunit beta-1 | GNB1      | 0.82     | 0.89     | 1.15     | 0.87     | 0.95       | 0.17 | 12       | 44         | 0.00E+00  |
| P36871-1   | Glucose phosphomutase 1                                          | PGM1      | 0.89     | 0.82     | 1.15     | 0.87     | 0.95       | 0.17 | 12       | 32         | 5.40E-90  |
| P45973     | Antigen p25                                                      | CBX5      | 0.83     | 0.87     | 1.16     | 0.86     | 0.95       | 0.18 | 15       | 64         | 6.58E-214 |
| B4DI36     | cDNA FLJ55061, highly similar to RPA-interacting protein         | RIP       | 1.15     | 0.78     | 0.93     | 1.08     | 0.95       | 0.19 | 2        | 16         | 2.29E-06  |
| Q63HN8-1   | RING finger protein 213                                          | C17orf2 7 | 1.08     | 1.05     | 0.73     | 1.37     | 0.95       | 0.19 | 27       | 7.8        | 1.18E-145 |
| P27348     | 14-3-3 protein tau                                               | YWHA Q    | 0.78     | 0.91     | 1.17     | 0.85     | 0.95       | 0.20 | 22       | 69         | 0.00E+00  |

| UniProt ID | Protein_Name                                                                                                            | Gene Name | F1 (L/H) | F2 (L/H) | R1 (H/L) | R1 (L/H) | Mean (T/U) | S.D. | Pep. No. | %Seq. Cov. | PEP       |
|------------|-------------------------------------------------------------------------------------------------------------------------|-----------|----------|----------|----------|----------|------------|------|----------|------------|-----------|
| O75381-1   | Peroxin-14                                                                                                              | PEX14     | 0.82     | 0.81     | 1.23     | 0.81     | 0.95       | 0.24 | 3        | 6.6        | 6.11E-33  |
| Q9HC38-2   | Glyoxalase domain-containing protein 4                                                                                  | C17orf25  | 0.71     | 0.76     | 1.39     | 0.72     | 0.95       | 0.38 | 19       | 65         | 2.25E-123 |
| Q9NW82     | WD repeat-containing protein 70                                                                                         | WDR70     | 0.92     | 0.99     | 0.95     | 1.05     | 0.95       | 0.04 | 3        | 5.4        | 2.81E-12  |
| Q06210-1   | D-fructose-6-phosphate amidotransferase 1                                                                               | GFAT      | 0.93     | 0.92     | 1.01     | 0.99     | 0.95       | 0.05 | 15       | 28         | 3.83E-112 |
| B2RB47     | cDNA, FLJ95309, highly similar to Homo sapiens adenosine monophosphate deaminase 2 (isoform L)(AMPD2), mRNA             | AMPD2     | 0.97     | 0.88     | 1.01     | 0.99     | 0.95       | 0.07 | 9        | 9.9        | 4.90E-34  |
| Q12874     | Spliceosome-associated protein 61                                                                                       | SAP61     | 0.97     | 0.88     | 1.01     | 0.99     | 0.95       | 0.07 | 19       | 40         | 8.94E-213 |
| O00505     | Importin alpha Q2                                                                                                       | KPNA3     | 1.03     | 0.92     | 0.91     | 1.10     | 0.95       | 0.07 | 8        | 26         | 8.99E-23  |
| P30533     | Alpha-2-macroglobulin receptor-associated protein                                                                       | A2MRAP    | 0.87     | 0.96     | 1.03     | 0.97     | 0.95       | 0.08 | 2        | 9          | 2.09E-17  |
| B3KXE1     | cDNA FLJ45281 fis, clone BRHIP3001481, highly similar to Tyrosine-protein phosphatase non-receptor type 7 (EC 3.1.3.48) | PTPN7     | 1.05     | 0.90     | 0.91     | 1.10     | 0.95       | 0.08 | 6        | 19         | 1.22E-148 |
| Q96A33-1   | Coiled-coil domain-containing protein 47                                                                                | CCDC47    | 0.87     | 1.08     | 0.91     | 1.10     | 0.95       | 0.11 | 5        | 12         | 1.89E-13  |
| Q9NSD9     | Phenylalanine--tRNA ligase beta chain                                                                                   | FARSB     | 1.05     | 1.01     | 0.80     | 1.25     | 0.95       | 0.13 | 19       | 33         | 1.90E-175 |
| Q96PK6-1   | Paraspeckle protein 2                                                                                                   | RBM14     | 0.87     | 0.88     | 1.11     | 0.90     | 0.95       | 0.14 | 21       | 31         | 2.20E-127 |
| O75390     | Citrate synthase, mitochondrial                                                                                         | CS        | 0.86     | 0.88     | 1.12     | 0.89     | 0.95       | 0.14 | 13       | 37         | 2.12E-68  |
| Q8TCS8     | 3-5 RNA exonuclease OLD35                                                                                               | PNPASE    | 0.98     | 1.09     | 0.79     | 1.27     | 0.95       | 0.15 | 7        | 13         | 2.90E-58  |
| Q9H845     | Acyl-CoA dehydrogenase family member 9, mitochondrial                                                                   | ACAD9     | 0.76     | 1.03     | 1.07     | 0.93     | 0.95       | 0.17 | 6        | 16         | 2.56E-38  |
| Q9Y315     | Phosphodeoxyriboaldolase                                                                                                | CGI-26    | 1.00     | 0.76     | 1.10     | 0.91     | 0.95       | 0.17 | 4        | 18         | 8.94E-18  |
| Q8WYA6-1   | Beta-catenin-like protein 1                                                                                             | C20orf33  | 0.79     | 0.89     | 1.18     | 0.85     | 0.95       | 0.20 | 7        | 16         | 7.08E-56  |
| P52789     | Hexokinase type II                                                                                                      | HK2       | 1.02     | 1.12     | 0.72     | 1.39     | 0.95       | 0.21 | 12       | 16         | 1.09E-87  |
| B7ZKL8     | TUBGCP2 protein                                                                                                         | TUBGCP2   | 0.76     | 0.92     | 1.18     | 0.85     | 0.95       | 0.21 | 5        | 5.9        | 2.85E-24  |
| P67809     | CCAAT-binding transcription factor I                                                                                    | NSEP1     | 1.02     | 1.14     | 0.70     | 1.43     | 0.95       | 0.23 | 18       | 65         | 0.00E+00  |

| UniProt ID | Protein_Name                                      | Gene Name       | F1 (L/H) | F2 (L/H) | R1 (H/L) | R1 (L/H) | Mean (T/U) | S.D. | Pep. No. | %Seq. Cov. | PEP       |
|------------|---------------------------------------------------|-----------------|----------|----------|----------|----------|------------|------|----------|------------|-----------|
|            | subunit A                                         |                 |          |          |          |          |            |      |          |            |           |
| P04083     | Annexin A1                                        | ANX1            | 0.69     | 0.68     | 1.49     | 0.67     | 0.95       | 0.46 | 21       | 65         | 0.00E+00  |
| O60826     | Coiled-coil domain-containing protein 22          | CCDC22          | 0.69     |          | 1.22     | 0.82     | 0.96       | 0.37 | 6        | 17         | 2.78E-31  |
| P36405     | ADP-ribosylation factor-like protein 3            | ARFL3           | 0.98     |          | 0.93     | 1.08     | 0.96       | 0.04 | 8        | 60         | 1.23E-42  |
| A8MW D9    | Small nuclear ribonucleoprotein G-like protein    | PBSCG           |          | 1.01     | 0.90     | 1.11     | 0.96       | 0.08 | 3        | 37         | 2.40E-23  |
| Q5M8S8     | SIX6 protein                                      | SIX6            | 0.84     | 1.07     |          |          | 0.96       | 0.16 | 3        | 17         | 2.74E-26  |
| Q9NS86     | LanC-like protein 2                               | GPR69B          | 0.79     | 1.22     | 0.86     | 1.16     | 0.96       | 0.23 | 3        | 6.9        | 9.89E-35  |
| P61086-1   | Huntingtin-interacting protein 2                  | HIP2            | 1.02     | 1.16     | 0.69     | 1.45     | 0.96       | 0.24 | 8        | 58         | 5.39E-155 |
| P28838-1   | Cytosol aminopeptidase                            | LAP3            | 0.95     | 0.96     | 0.96     | 1.04     | 0.96       | 0.01 | 23       | 57         | 1.54E-304 |
| Q53HL2     | Borealin                                          | CDCA8           | 0.95     | 0.97     | 0.95     | 1.05     | 0.96       | 0.01 | 6        | 25         | 7.20E-20  |
| P50914     | 60S ribosomal protein L14                         | RPL14           | 0.98     | 0.93     | 0.96     | 1.04     | 0.96       | 0.03 | 9        | 38         | 3.48E-67  |
| Q3S611     | Cyclophilin-33B                                   | PPIE            | 0.98     | 0.97     | 0.92     | 1.09     | 0.96       | 0.03 | 5        | 23         | 4.17E-32  |
| P14859-2   | Octamer-binding protein 1                         | 41183           | 0.94     | 0.92     | 1.01     | 0.99     | 0.96       | 0.05 | 3        | 6.9        | 2.17E-52  |
| Q9NXV2     | BTB/POZ domain-containing protein KCTD5           | KCTD5           | 0.96     | 1.02     | 0.89     | 1.12     | 0.96       | 0.07 | 3        | 33         | 1.12E-12  |
| Q5VZU9     | Tripeptidyl peptidase II                          | RP11-29B2.2-002 | 1.04     | 0.93     | 0.90     | 1.11     | 0.96       | 0.07 | 24       | 24         | 1.39E-123 |
| Q9H0U4     | Ras-related protein Rab-1B                        | RAB1B           | 0.89     | 0.94     | 1.04     | 0.96     | 0.96       | 0.08 | 9        | 54         | 8.39E-255 |
| P54132     | Bloom syndrome protein                            | BLM             | 0.92     | 1.05     | 0.90     | 1.11     | 0.96       | 0.08 | 5        | 4.7        | 1.31E-25  |
| Q96D71-1   | RalBP1-associated Eps domain-containing protein 1 | REPS1           | 0.92     | 1.06     | 0.89     | 1.12     | 0.96       | 0.09 | 6        | 12         | 9.29E-11  |
| P50502     | Hsc70-interacting protein                         | FAM10A1         | 1.00     | 1.02     | 0.85     | 1.18     | 0.96       | 0.09 | 8        | 25         | 2.24E-85  |
| O75165     | DnaJ homolog subfamily C member 13                | DNAJC13         | 0.86     | 1.05     | 0.96     | 1.04     | 0.96       | 0.10 | 8        | 5.9        | 2.44E-69  |
| O75937     | DnaJ homolog subfamily C member 8                 | DNAJC8          | 0.85     | 0.96     | 1.06     | 0.94     | 0.96       | 0.11 | 12       | 42         | 1.43E-109 |
| P62280     | 40S ribosomal protein S11                         | RPS11           | 1.03     | 1.01     | 0.83     | 1.20     | 0.96       | 0.11 | 12       | 53         | 2.81E-55  |
| Q5TBB1     | Aicardi-Goutieres syndrome 2 protein              | DLEU8           | 0.85     | 0.94     | 1.08     | 0.93     | 0.96       | 0.12 | 11       | 34         | 8.46E-38  |
| Q9NTJ3-1   | Chromosome-associated polypeptide C               | CAPC            | 0.95     | 1.08     | 0.84     | 1.19     | 0.96       | 0.12 | 40       | 33         | 2.10E-204 |
| P53634     | Cathepsin C                                       | CPPI            | 1.11     | 0.89     | 0.87     | 1.15     | 0.96       | 0.13 | 8        | 29         | 5.26E-79  |



| UniProt ID | Protein_Name                                                       | Gene Name   | F1 (L/H) | F2 (L/H) | R1 (H/L) | R1 (L/H) | Mean (T/U) | S.D. | Pep. No. | %Seq. Cov. | PEP       |
|------------|--------------------------------------------------------------------|-------------|----------|----------|----------|----------|------------|------|----------|------------|-----------|
| P35251-1   | Activator 1 140 kDa subunit                                        | RFC1        | 0.85     | 0.89     | 1.13     | 0.88     | 0.96       | 0.15 | 13       | 14         | 6.83E-180 |
| P46940     | Ras GTPase-activating-like protein IQGAP1                          | IQGAP1      | 0.85     | 0.89     | 1.13     | 0.88     | 0.96       | 0.15 | 51       | 44         | 0.00E+00  |
| C9JRZ6     | Putative uncharacterized protein CHCHD3                            | CHCHD3      | 0.81     | 0.9      | 1.16     | 0.86     | 0.96       | 0.18 | 14       | 46         | 3.97E-123 |
| P24539     | ATP synthase subunit b, mitochondrial                              | ATP5F1      | 0.86     | 0.84     | 1.17     | 0.85     | 0.96       | 0.19 | 10       | 42         | 1.75E-65  |
| Q12789-2   | General transcription factor 3C polypeptide 1                      | GTF3C1      | 1.17     | 0.95     | 0.75     | 1.33     | 0.96       | 0.21 | 6        | 4.8        | 2.14E-49  |
| Q92930     | Ras-related protein Rab-8B                                         | RAB8B       | 0.81     | 0.85     | 1.21     | 0.83     | 0.96       | 0.22 | 6        | 36         | 3.47E-119 |
| Q92922     | BRG1-associated factor 155                                         | BAF155      | 0.83     | 0.81     | 1.23     | 0.81     | 0.96       | 0.24 | 24       | 23         | 6.92E-168 |
| Q8IV48     | 3-5 exonuclease ERI1                                               | 3EXO        | 1.17     | 1.06     | 0.64     | 1.56     | 0.96       | 0.28 | 2        | 6.6        | 2.78E-17  |
| P00491     | Inosine phosphorylase                                              | NP          | 0.82     | 0.76     | 1.29     | 0.78     | 0.96       | 0.29 | 17       | 63         | 2.07E-288 |
| P62258     | 14-3-3 protein epsilon                                             | YWHA E      | 0.76     | 0.81     | 1.30     | 0.77     | 0.96       | 0.30 | 23       | 77         | 0.00E+00  |
| Q9H9Q2-1   | COP9 signalosome complex subunit 7b                                | COPS7 B     | 0.71     | 0.85     | 1.31     | 0.76     | 0.96       | 0.31 | 6        | 28         | 1.52E-150 |
| P68431     | Histone H3.1                                                       | H3FA        | 0.75     | 0.75     | 1.37     | 0.73     | 0.96       | 0.36 | 9        | 53         | 4.67E-131 |
| P50579     | Initiation factor 2-associated 67 kDa glycoprotein                 | METAP2      | 1.05     | 1.32     | 0.50     | 2.00     | 0.96       | 0.42 | 3        | 8.2        | 2.77E-80  |
| Q9BT78     | COP9 signalosome complex subunit 4                                 | COPS4       | 0.94     | 0.94     | 1.00     | 1.00     | 0.96       | 0.03 | 9        | 27         | 2.41E-87  |
| P11172-1   | Orotate phosphoribosyltransferase                                  | OK/SW-cl.21 | 0.99     | 0.92     | 0.97     | 1.03     | 0.96       | 0.04 | 10       | 23         | 9.46E-58  |
| Q9Y606-1   | tRNA pseudouridine synthase A                                      | PP8985      | 0.97     | 0.92     | 0.99     | 1.01     | 0.96       | 0.04 | 7        | 20         | 3.12E-51  |
| Q5HYJ3-1   | Protein FAM76B                                                     | FAM76 B     | 0.94     | 1.02     | 0.92     | 1.09     | 0.96       | 0.05 | 4        | 12         | 8.65E-25  |
| Q9Y2L1-1   | Exosome complex exonuclease RRP44                                  | DIS3        | 0.99     | 1.01     | 0.88     | 1.14     | 0.96       | 0.07 | 6        | 10         | 9.67E-70  |
| Q14966-1   | Cutaneous T-cell lymphoma-associated antigen se33-1                | NP220       | 0.94     | 1.04     | 0.90     | 1.11     | 0.96       | 0.07 | 9        | 7.6        | 5.36E-35  |
| Q01196-8   | Acute myeloid leukemia 1 protein                                   | AML1        | 1.01     | 0.87     | 1.00     | 1.00     | 0.96       | 0.08 | 6        | 18         | 9.23E-28  |
| O15212     | Prefoldin subunit 6                                                | HKE2        | 0.90     | 1.02     |          |          | 0.96       | 0.08 | 7        | 40         | 5.93E-125 |
| Q8NFH4     | Nucleoporin Nup37                                                  | NUP37       | 1.03     | 0.99     | 0.86     | 1.16     | 0.96       | 0.09 | 4        | 17         | 1.12E-42  |
| Q6B6N3     | Galphai2 protein                                                   | GNAI2       | 0.89     | 0.92     | 1.07     | 0.93     | 0.96       | 0.10 | 15       | 56         | 8.07E-241 |
| Q9P0S2     | Cytochrome c oxidase assembly protein COX16 homolog, mitochondrial | C14orf112   | 1.03     | 0.89     |          |          | 0.96       | 0.10 | 2        | 22         | 2.39E-09  |

| UniProt ID | Protein_Name                                       | Gene Name | F1 (L/H) | F2 (L/H) | R1 (H/L) | R1 (L/H) | Mean (T/U) | S.D. | Pep. No. | %Seq. Cov. | PEP       |
|------------|----------------------------------------------------|-----------|----------|----------|----------|----------|------------|------|----------|------------|-----------|
| Q3B867     | PABPC4 protein                                     | PABPC4    | 0.95     | 1.09     | 0.84     | 1.19     | 0.96       | 0.13 | 24       | 39         | 0.00E+00  |
| Q14790-9   | Apoptotic cysteine protease                        | CASP8     | 0.85     | 0.93     | 1.10     | 0.91     | 0.96       | 0.13 | 3        | 7.2        | 1.45E-20  |
| P08133     | 67 kDa calelectrin                                 | ANX6      | 0.86     |          | 1.06     | 0.94     | 0.96       | 0.14 | 38       | 66         | 0.00E+00  |
| P04080     | Cystatin-B                                         | CST6      | 0.85     | 0.91     | 1.12     | 0.89     | 0.96       | 0.14 | 4        | 52         | 1.35E-41  |
| Q16401     | 26S protease subunit S5 basic                      | KIAA0072  | 0.91     | 0.85     | 1.12     | 0.89     | 0.96       | 0.14 | 12       | 32         | 9.02E-222 |
| Q99460-1   | 26S proteasome non-ATPase regulatory subunit 1     | PSMD1     | 1.01     | 1.07     | 0.80     | 1.25     | 0.96       | 0.14 | 24       | 36         | 1.19E-203 |
| O75170-1   | SAPS domain family member 2                        | KIAA0685  | 0.85     |          | 1.07     | 0.93     | 0.96       | 0.16 | 2        | 3.7        | 1.82E-11  |
| Q9H446     | DRG family-regulatory protein 2                    | CGI-24    | 1.07     | 0.85     |          |          | 0.96       | 0.16 | 2        | 11         | 3.90E-62  |
| Q9NY33-1   | Dipeptidyl aminopeptidase III                      | DPP3      | 0.89     | 0.84     | 1.15     | 0.87     | 0.96       | 0.17 | 23       | 45         | 0.00E+00  |
| B2R9Y2     | cDNA, FLJ94609                                     | CCDC55    | 0.93     | 1.17     | 0.78     | 1.28     | 0.96       | 0.20 | 5        | 4.4        | 6.00E-22  |
| Q4G176-1   | Acyl-CoA synthetase family member 3, mitochondrial | ACSF3     | 1.10     |          | 0.82     | 1.22     | 0.96       | 0.20 | 4        | 13         | 8.66E-39  |
| Q9Y295     | Developmentally-regulated GTP-binding protein 1    | DRG1      | 1.07     | 1.11     | 0.70     | 1.43     | 0.96       | 0.23 | 13       | 53         | 1.37E-162 |
| B8ZZD4     | Putative uncharacterized protein TAX1BP1           | TAX1BP1   |          | 0.79     | 1.13     | 0.88     | 0.96       | 0.24 | 2        | 2.1        | 1.22E-04  |
| Q00013     | 55 kDa erythrocyte membrane protein                | DXS552E   | 0.69     | 1.19     | 1.00     | 1.00     | 0.96       | 0.25 | 9        | 31         | 7.06E-49  |
| B9A001     | Putative uncharacterized protein MPP6              | MPP6      |          | 1.15     | 0.77     | 1.30     | 0.96       | 0.27 | 3        | 5.8        | 6.33E-09  |
| P50583     | Bis(5-nucleosyl)-tetrphosphatase [asymmetrical]    | APAH1     | 1.22     |          | 0.70     | 1.43     | 0.96       | 0.37 | 3        | 25         | 1.31E-26  |
| P49406     | 39S ribosomal protein L15, mitochondrial           | KIAA0104  |          | 0.50     | 1.42     | 0.70     | 0.96       | 0.65 | 2        | 6.2        | 9.48E-05  |
| Q8NHQ9     | ATP-dependent RNA helicase DDX55                   | DDX55     |          |          | 0.96     | 1.04     | 0.96       |      | 2        | 5.2        | 1.07E-03  |
| Q9UIV1     | BTG1-binding factor 1                              | CAF1      |          |          | 0.96     | 1.04     | 0.96       |      | 3        | 13         | 3.28E-13  |
| Q14692     | Ribosome assembly protein BMS1 homolog             | BMS1      |          |          | 0.96     | 1.04     | 0.96       |      | 4        | 3.7        | 1.01E-10  |
| Q9H6L4     | Armadillo repeat-containing protein 7              | ARMC7     | 0.96     |          |          |          | 0.96       |      | 2        | 17         | 3.26E-64  |
| O60508     | Cell division cycle 40 homolog                     | CDC40     | 0.96     |          |          |          | 0.96       |      | 2        | 4.3        | 4.42E-05  |
| Q12846     | Renal carcinoma antigen NY-REN-31                  | STX4      |          | 0.96     |          |          | 0.96       |      | 2        | 9.4        | 1.73E-24  |
| Q86Y79     | Probable peptidyl-tRNA hydrolase                   | C9orf115  | 0.96     |          |          |          | 0.96       |      | 2        | 22         | 1.94E-17  |
| Q6P1X6     | UPF0598 protein                                    | C8orf82   | 0.96     |          |          |          | 0.96       |      | 2        | 13         | 1.89E-03  |

| UniProt ID | Protein_Name                                                                                                                               | Gene Name | F1 (L/H) | F2 (L/H) | R1 (H/L) | R1 (L/H) | Mean (T/U) | S.D. | Pep. No. | %Seq. Cov. | PEP       |
|------------|--------------------------------------------------------------------------------------------------------------------------------------------|-----------|----------|----------|----------|----------|------------|------|----------|------------|-----------|
| -1         | C8orf82                                                                                                                                    |           |          |          |          |          |            |      |          |            |           |
| Q8WZA0     | Leucine zipper and CTNNBIP1 domain-containing protein                                                                                      | LZIC      | 0.96     |          |          |          | 0.96       |      | 3        | 15         | 2.79E-08  |
| Q969R2     | Oxysterol-binding protein 2                                                                                                                | KIAA1664  | 0.96     |          |          |          | 0.96       |      | 4        | 5.6        | 2.92E-15  |
| Q6ZN33     | cDNA FLJ16473 fis, clone BRHIP3026052, highly similar to Serine/threonine protein phosphatase 2A, 56 kDa regulatory subunit, gamma isoform | KIAA0044  | 0.96     |          |          |          | 0.96       |      | 4        | 12         | 8.91E-163 |
| Q5C9Z4     | Nucleolar MIF4G domain-containing protein 1                                                                                                | C7orf3    | 0.92     | 1.07     | 0.89     | 1.12     | 0.96       | 0.10 | 9        | 13         | 4.26E-44  |
| Q9Y5Q8-3   | General transcription factor 3C polypeptide 5                                                                                              | CDABP0017 | 1.00     | 1.03     | 0.85     | 1.18     | 0.96       | 0.10 | 7        | 14         | 1.76E-41  |
| Q13895     | Bystin                                                                                                                                     | BYSL      | 1.01     | 1.06     | 0.81     | 1.23     | 0.96       | 0.13 | 10       | 25         | 1.04E-52  |
| Q13409-1   | Cytoplasmic dynein 1 intermediate chain 2                                                                                                  | DNCI2     | 1.04     | 1.07     | 0.77     | 1.30     | 0.96       | 0.17 | 8        | 20         | 1.74E-192 |
| Q13144     | eIF-2B GDP-GTP exchange factor subunit epsilon                                                                                             | EIF2B5    | 1.12     | 1.07     | 0.69     | 1.45     | 0.96       | 0.24 | 8        | 13         | 1.89E-46  |
| Q9Y3D0     | Protein FAM96B                                                                                                                             | CGI-128   | 1.22     | 1.06     | 0.60     | 1.67     | 0.96       | 0.32 | 3        | 31         | 1.38E-15  |
| Q16630-2   | Cleavage and polyadenylation specificity factor 68 kDa subunit                                                                             | CFIM68    | 0.96     | 0.97     | 0.96     | 1.04     | 0.96       | 0.01 | 9        | 22         | 1.47E-230 |
| P30085     | Cytidine monophosphate kinase                                                                                                              | CMK       | 0.97     | 0.98     | 0.94     | 1.06     | 0.96       | 0.02 | 11       | 47         | 4.98E-286 |
| P63167     | 8 kDa dynein light chain                                                                                                                   | DLC1      | 0.96     | 0.99     | 0.94     | 1.06     | 0.96       | 0.03 | 6        | 64         | 1.60E-47  |
| P11142-1   | Heat shock 70 kDa protein 8                                                                                                                | HSC70     | 0.95     | 1.00     | 0.94     | 1.06     | 0.96       | 0.03 | 47       | 65         | 0.00E+00  |
| O96019-1   | 53 kDa BRG1-associated factor A                                                                                                            | ACTL6A    | 0.98     | 0.92     | 0.99     | 1.01     | 0.96       | 0.04 | 8        | 25         | 5.31E-80  |
| Q96I24-1   | Far upstream element-binding protein 3                                                                                                     | FBP3      | 0.96     | 0.92     | 1.01     | 0.99     | 0.96       | 0.05 | 16       | 38         | 1.23E-50  |
| Q92598-1   | Antigen NY-CO-25                                                                                                                           | HSP105    | 0.99     | 1.02     | 0.88     | 1.14     | 0.96       | 0.07 | 41       | 54         | 0.00E+00  |
| P29692-2   | Antigen NY-CO-4                                                                                                                            | EF1D      | 0.98     | 1.03     | 0.88     | 1.14     | 0.96       | 0.08 | 12       | 24         | 2.50E-296 |
| P61289-2   | 11S regulator complex subunit gamma                                                                                                        | PSME3     | 1.04     | 1.01     | 0.84     | 1.19     | 0.96       | 0.11 | 9        | 32         | 3.23E-211 |
| P50552     | Vasodilator-stimulated phosphoprotein                                                                                                      | VASP      | 0.82     | 0.90     | 1.17     | 0.85     | 0.96       | 0.18 | 8        | 21         | 5.20E-107 |
| P23368     | Malic enzyme 2                                                                                                                             | ME2       | 0.86     | 0.85     | 1.18     | 0.85     | 0.96       | 0.19 | 16       | 49         | 3.35E-228 |
| P06746     | DNA polymerase beta                                                                                                                        | POLB      | 0.84     | 0.85     | 1.20     | 0.83     | 0.96       | 0.21 | 2        | 11         | 3.30E-08  |

| UniProt ID | Protein_Name                                     | Gene Name   | F1 (L/H) | F2 (L/H) | R1 (H/L) | R1 (L/H) | Mean (T/U) | S.D. | Pep. No. | %Seq. Cov. | PEP       |
|------------|--------------------------------------------------|-------------|----------|----------|----------|----------|------------|------|----------|------------|-----------|
| A6NIH7     | Protein unc-119 homolog B                        | UNC119B     | 1.11     | 1.06     | 0.72     | 1.39     | 0.96       | 0.21 | 5        | 27         | 8.32E-19  |
| P46459     | N-ethylmaleimide-sensitive fusion protein        | NSF         | 0.83     | 0.84     | 1.22     | 0.82     | 0.96       | 0.22 | 16       | 25         | 1.42E-108 |
| Q9NP66-1   | High mobility group protein 20A                  | HMG20A      | 0.68     | 1.14     | 1.07     | 0.93     | 0.96       | 0.25 | 2        | 9.2        | 5.05E-05  |
| O95983-1   | Methyl-CpG-binding domain protein 3              | MBD3        | 0.75     | 0.86     | 1.28     | 0.78     | 0.96       | 0.28 | 6        | 24         | 3.48E-186 |
| Q9H6R4-1   | Nucleolar protein 6                              | NOL6        | 1.27     | 1.03     | 0.59     | 1.69     | 0.96       | 0.34 | 9        | 11         | 1.07E-43  |
| Q15149-4   | Hemidesmosomal protein 1                         | PLEC1       | 0.74     | 0.75     | 1.4      | 0.71     | 0.96       | 0.38 | ##       | 30         | 0.00E+00  |
| Q8WWP7     | GTPase IMAP family member 1                      | GIMAP1      | 0.58     | 0.62     | 1.69     | 0.59     | 0.96       | 0.63 | 8        | 29         | 1.38E-48  |
| P13073     | Cytochrome c oxidase polypeptide IV              | COX4        | 0.97     | 1.00     | 0.92     | 1.09     | 0.96       | 0.04 | 7        | 33         | 1.88E-20  |
| Q9NQX3-2   | Domain E                                         | GPH         | 0.98     | 0.89     | 1.02     | 0.98     | 0.96       | 0.07 | 5        | 9.9        | 3.03E-54  |
| P15880     | 40S ribosomal protein S2                         | RPS2        | 1.00     | 1.03     | 0.86     | 1.16     | 0.96       | 0.09 | 15       | 49         | 7.72E-112 |
| P62244     | 40S ribosomal protein S15a                       | OK/SW-cl.82 | 1.02     | 1.02     | 0.85     | 1.18     | 0.96       | 0.10 | 7        | 58         | 1.10E-21  |
| Q9UHB9-1   | Signal recognition particle 68 kDa protein       | SRP68       | 0.89     | 0.92     | 1.08     | 0.93     | 0.96       | 0.10 | 22       | 38         | 7.64E-218 |
| P49321-3   | Nuclear autoantigenic sperm protein              | NASP        | 0.85     | 0.98     | 1.06     | 0.94     | 0.96       | 0.11 | 19       | 28         | 0.00E+00  |
| Q9Y5P6-2   | GDP-mannose pyrophosphorylase B                  | GMPPB       | 1.09     | 0.95     | 0.85     | 1.18     | 0.96       | 0.12 | 4        | 13         | 3.69E-38  |
| Q5T4S7-2   | 600 kDa retinoblastoma protein-associated factor | KIAA0462    | 1.04     | 1.03     | 0.82     | 1.22     | 0.96       | 0.12 | 24       | 8.4        | 0.00E+00  |
| P05388     | 60S acidic ribosomal protein P0                  | RPLP0       | 1.02     | 1.05     | 0.82     | 1.22     | 0.96       | 0.13 | 14       | 53         | 4.41E-248 |
| Q9NVI7-2   | ATPase family AAA domain-containing protein 3A   | ATAD3A      | 0.89     | 0.89     | 1.11     | 0.90     | 0.96       | 0.13 | 16       | 29         | 8.55E-90  |
| Q96C86     | Hint-related 7meGMP-directed hydrolase           | DCPS        | 0.89     | 0.88     | 1.12     | 0.89     | 0.96       | 0.14 | 9        | 38         | 2.77E-218 |
| A8MSQ1     | Putative uncharacterized protein PHF14           | PHF14       | 0.80     | 0.99     | 1.10     | 0.91     | 0.96       | 0.15 | 4        | 5.4        | 3.39E-41  |
| Q9BQ52-1   | ElaC homolog protein 2                           | ELAC2       | 1.07     | 1.05     | 0.77     | 1.30     | 0.96       | 0.17 | 20       | 31         | 5.24E-110 |
| Q15555-1   | APC-binding protein EB2                          | MAPRE2      | 1.02     | 1.12     | 0.75     | 1.33     | 0.96       | 0.19 | 15       | 39         | 3.87E-96  |
| O14646-1   | ATP-dependent helicase CHD1                      | CHD1        | 1.12     | 1.10     | 0.67     | 1.49     | 0.96       | 0.25 | 14       | 13         | 2.70E-57  |
| O94925-1   | Glutaminase kidney isoform, mitochondrial        | GLS         | 0.68     | 1.28     | 0.93     | 1.08     | 0.96       | 0.30 | 10       | 19         | 2.45E-103 |

| UniProt ID | Protein_Name                                                       | Gene Name         | F1 (L/H) | F2 (L/H) | R1 (H/L) | R1 (L/H) | Mean (T/U) | S.D. | Pep. No. | %Seq. Cov. | PEP       |
|------------|--------------------------------------------------------------------|-------------------|----------|----------|----------|----------|------------|------|----------|------------|-----------|
| P63104     | 14-3-3 protein zeta/delta                                          | YWHAZ             | 0.77     | 0.80     | 1.32     | 0.76     | 0.96       | 0.31 | 25       | 78         | 0.00E+00  |
| P04234     | T-cell receptor T3 delta chain                                     | CD3D              | 0.65     | 0.76     | 1.48     | 0.68     | 0.96       | 0.45 | 6        | 52         | 1.24E-78  |
| P61923     | Coatamer subunit zeta-1                                            | CGI-120           | 1.05     | 1.10     | 0.74     | 1.35     | 0.96       | 0.20 | 4        | 25         | 8.15E-43  |
| O60341-2   | BRAF35-HDAC complex protein BHC110                                 | AOF2              | 1.23     |          | 0.70     | 1.43     | 0.97       | 0.37 | 8        | 13         | 3.45E-68  |
| Q06323     | 11S regulator complex subunit alpha                                | IFI5111           | 0.93     |          | 1.00     | 1.00     | 0.97       | 0.05 | 15       | 61         | 0.00E+00  |
| P29084     | General transcription factor IIE subunit 2                         | GTF2E2            | 0.92     | 1.01     |          |          | 0.97       | 0.06 | 2        | 9.3        | 4.00E-41  |
| P49593     | Ca(2+)/calmodulin-dependent protein kinase phosphatase             | KIAA0015          | 1.02     |          | 0.91     | 1.10     | 0.97       | 0.08 | 8        | 32         | 9.79E-32  |
| P298288    | 70 kDa peroxisomal membrane protein                                | ABCD3             | 1.06     |          | 0.87     | 1.15     | 0.97       | 0.13 | 8        | 17         | 1.97E-34  |
| Q9BTV4     | Protein LUMA                                                       | TMEM43            | 0.84     |          | 1.09     | 0.92     | 0.97       | 0.18 | 3        | 17         | 3.20E-17  |
| Q53FI6     | Transporter 2, ATP-binding cassette, subfamily B isoform 1 variant | DAAP-57C1.2-001   |          | 0.81     | 1.12     | 0.89     | 0.97       | 0.22 | 2        | 4.4        | 3.17E-20  |
| Q7Z3K3-1   | Pogo transposable element with ZNF domain                          | KIAA0461          | 0.97     | 0.96     | 0.97     | 1.03     | 0.97       | 0.01 | 8        | 8.9        | 3.93E-52  |
| P24534     | Elongation factor 1-beta                                           | EEF1B             | 0.97     | 0.99     | 0.94     | 1.06     | 0.97       | 0.03 | 8        | 48         | 3.88E-121 |
| B4DTG2     | cDNA FLJ56389, highly similar to Elongation factor 1-gamma         | EEF1G             | 0.98     | 1.00     | 0.92     | 1.09     | 0.97       | 0.04 | 25       | 59         | 0.00E+00  |
| Q8NF37     | 1-acylglycerophosphocholine O-acyltransferase                      | AYTL2             | 1.02     | 0.96     | 0.92     | 1.09     | 0.97       | 0.05 | 4        | 9.9        | 3.77E-77  |
| A8MVV7     | 60S ribosomal protein L7                                           | RPL7              | 0.98     | 1.01     | 0.91     | 1.10     | 0.97       | 0.05 | 21       | 49         | 4.62E-175 |
| A6NFN2     | Putative uncharacterized protein ABI1                              | ABI1              | 1.00     | 1.00     | 0.90     | 1.11     | 0.97       | 0.06 | 4        | 12         | 6.50E-33  |
| O00178     | GTP-binding protein 1                                              | GTPBP1            | 0.89     | 0.95     | 1.06     | 0.94     | 0.97       | 0.09 | 2        | 4          | 1.23E-19  |
| P31939     | 5-aminoimidazole-4-carboxamide ribonucleotide formyltransferase    | ATIC              | 1.02     | 1.02     | 0.86     | 1.16     | 0.97       | 0.09 | 36       | 76         | 0.00E+00  |
| Q5LJA9     | Ubiquitin carboxyl-terminal hydrolase L5                           | RP11-101E13.2-006 | 1.01     | 1.04     | 0.85     | 1.18     | 0.97       | 0.10 | 9        | 33         | 1.53E-86  |
| Q5SRQ6     | Casein kinase 2 beta polypeptide                                   | CSNK2B            | 0.97     | 0.85     | 1.08     | 0.93     | 0.97       | 0.12 | 7        | 35         | 2.01E-99  |
| A2A284     | Phospholipase C,                                                   | hCG_20            | 0.85     | 1.09     | 0.96     | 1.04     | 0.97       | 0.12 | 11       | 13         | 1.67E-98  |

| UniProt ID | Protein_Name                                                              | Gene Name | F1 (L/H) | F2 (L/H) | R1 (H/L) | R1 (L/H) | Mean (T/U) | S.D. | Pep. No. | %Seq. Cov. | PEP       |
|------------|---------------------------------------------------------------------------|-----------|----------|----------|----------|----------|------------|------|----------|------------|-----------|
|            | gamma 1                                                                   | 18597     |          |          |          |          |            |      |          |            |           |
| Q6P2E9-1   | Autoantigen Ge-1                                                          | EDC4      | 0.86     | 0.94     | 1.10     | 0.91     | 0.97       | 0.12 | 21       | 23         | 5.52E-179 |
| P22307-1   | Non-specific lipid-transfer protein                                       | SCP2      | 0.85     | 0.95     | 1.10     | 0.91     | 0.97       | 0.13 | 13       | 16         | 1.33E-78  |
| Q9UBB4     | Ataxin-10                                                                 | ATXN10    | 1.01     | 1.07     | 0.82     | 1.22     | 0.97       | 0.13 | 10       | 26         | 2.81E-227 |
| B4DLZ5     | cDNA FLJ56394, highly similar to N-acetylglucosamine kinase (EC 2.7.1.59) | hCG_41008 | 0.89     | 0.86     | 1.15     | 0.87     | 0.97       | 0.16 | 9        | 27         | 6.19E-37  |
| Q8WX X5    | DnaJ homolog subfamily C member 9                                         | DNAJC9    | 0.90     | 0.85     | 1.15     | 0.87     | 0.97       | 0.16 | 16       | 57         | 1.09E-122 |
| Q96GM5-1   | 60 kDa BRG-1/Brm-associated factor subunit A                              | BAF60A    | 0.74     | 1.00     | 1.16     | 0.86     | 0.97       | 0.21 | 6        | 15         | 4.37E-100 |
| Q9UNH7     | Sorting nexin-6                                                           | SNX6      | 0.88     | 0.81     | 1.21     | 0.83     | 0.97       | 0.21 | 6        | 17         | 3.87E-81  |
| P31937     | 3-hydroxyisobutyrate dehydrogenase, mitochondrial                         | HIBADH    | 0.73     | 0.90     | 1.27     | 0.79     | 0.97       | 0.28 | 7        | 27         | 1.23E-155 |
| Q9NQI0-1   | DEAD box protein 4                                                        | DDX4      | 0.96     | 0.93     | 1.01     | 0.99     | 0.97       | 0.04 | 3        | 4.1        | 1.05E-04  |
| Q53GS9     | Inactive ubiquitin-specific peptidase 39                                  | CGI-21    | 0.96     | 0.93     | 1.01     | 0.99     | 0.97       | 0.04 | 10       | 25         | 3.56E-95  |
| Q92804-1   | 68 kDa TATA-binding protein-associated factor                             | RBP56     | 0.90     | 0.99     | 1.01     | 0.99     | 0.97       | 0.06 | 11       | 23         | 1.17E-166 |
| Q16186     | 110 kDa cell membrane glycoprotein                                        | ADRM1     | 0.90     | 1.01     | 0.99     | 1.01     | 0.97       | 0.06 | 9        | 20         | 1.05E-90  |
| Q7Z5K2-3   | Friend of EBNA2 protein                                                   | FOE       | 1.03     | 0.90     | 0.97     | 1.03     | 0.97       | 0.07 | 7        | 9.1        | 6.01E-59  |
| P35269     | General transcription factor IIF 74 kDa subunit                           | GTF2F1    | 0.91     | 0.94     | 1.05     | 0.95     | 0.97       | 0.07 | 10       | 23         | 7.63E-201 |
| C9JE52     | Putative uncharacterized protein PSME2                                    | PSME2     | 0.88     | 1.01     | 1.01     | 0.99     | 0.97       | 0.08 | 9        | 40         | 1.89E-152 |
| P62158     | Calmodulin                                                                | CALM      | 0.89     | 0.93     | 1.08     | 0.93     | 0.97       | 0.10 | 7        | 53         | 8.59E-249 |
| P60891     | Phosphoribosyl pyrophosphate synthase I                                   | PRPS1     | 0.90     | 0.91     | 1.09     | 0.92     | 0.97       | 0.11 | 13       | 44         | 1.80E-159 |
| P21333-1   | Actin-binding protein 280                                                 | FLN       | 0.89     | 0.91     | 1.10     | 0.91     | 0.97       | 0.12 | ##       | 57         | 0.00E+00  |
| Q9UBQ0-2   | PEP11 homolog                                                             | DC15      | 1.03     | 1.11     | 0.76     | 1.32     | 0.97       | 0.18 | 6        | 35         | 5.49E-37  |
| P49915     | Glutamine amidotransferase                                                | GMPS      | 1.12     | 1.03     | 0.75     | 1.33     | 0.97       | 0.19 | 28       | 55         | 0.00E+00  |
| Q14155-5   | Beta-Pix                                                                  | ARHG EF7  | 0.79     | 0.91     | 1.20     | 0.83     | 0.97       | 0.21 | 8        | 14         | 2.95E-42  |
| B7Z7I3     | DnaJ homolog subfamily B member                                           | DNAJB12   | 1.00     | 1.20     | 0.70     | 1.43     | 0.97       | 0.25 | 4        | 14         | 3.04E-12  |

| UniProt ID | Protein_Name                                                   | Gene Name | F1 (L/H) | F2 (L/H) | R1 (H/L) | R1 (L/H) | Mean (T/U) | S.D. | Pep. No. | %Seq. Cov. | PEP      |
|------------|----------------------------------------------------------------|-----------|----------|----------|----------|----------|------------|------|----------|------------|----------|
|            | 12                                                             |           |          |          |          |          |            |      |          |            |          |
| O75113     | NEDD4-binding protein 1                                        | KIAA0615  | 0.99     | 1.02     | 0.90     | 1.11     | 0.97       | 0.06 | 3        | 5.1        | 1.16E-05 |
| P78527-1   | DNA-dependent protein kinase catalytic subunit                 | HYRC      | 1.03     | 1.06     | 0.82     | 1.22     | 0.97       | 0.13 | 80       | 24         | 0.00E+00 |
| P12270     | Nucleoprotein TPR                                              | TPR       | 0.99     | 1.10     | 0.82     | 1.22     | 0.97       | 0.14 | 55       | 30         | 0.00E+00 |
| Q9NVS9     | Pyridoxamine-phosphate oxidase                                 | PNPO      | 1.23     | 0.78     | 0.90     | 1.11     | 0.97       | 0.23 | 9        | 49         | 1.15E-48 |
| Q9BRP4-1   | Proteasomal ATPase-associated factor 1                         | PAAF1     | 1.17     | 1.22     | 0.52     | 1.92     | 0.97       | 0.39 | 2        | 6.1        | 3.55E-10 |
| Q99633-1   | Pre-mRNA-splicing factor 18                                    | HPRP18    | 0.96     |          | 0.98     | 1.02     | 0.97       | 0.01 | 2        | 7          | 1.22E-18 |
| Q9NR46-2   | Endophilin-B2                                                  | KIAA1848  | 1.01     | 0.93     |          |          | 0.97       | 0.06 | 3        | 8.9        | 4.79E-09 |
| Q8WUA4-1   | General transcription factor 3C polypeptide 2                  | GTF3C2    |          | 1.02     | 0.92     | 1.09     | 0.97       | 0.07 | 5        | 7.8        | 2.83E-07 |
| B7ZLH8     | EVPL protein                                                   | EVPL      | 0.92     | 1.02     |          |          | 0.97       | 0.07 | 3        | 1.7        | 8.13E-03 |
| O95926     | CCNDBP1-interactor                                             | CBPIN     | 1.09     |          | 0.85     | 1.18     | 0.97       | 0.17 | 4        | 21         | 2.51E-19 |
| Q9UKF6     | Cleavage and polyadenylation specificity factor 73 kDa subunit | CPSF3     | 1.09     |          | 0.85     | 1.18     | 0.97       | 0.17 | 5        | 8.2        | 1.57E-09 |
| Q9UGP8     | Translocation protein SEC63 homolog                            | SEC63     |          | 1.11     | 0.83     | 1.20     | 0.97       | 0.20 | 5        | 6.3        | 1.44E-36 |
| Q06547-1   | GA-binding protein subunit beta-1                              | E4TF1B    | 0.83     | 1.11     |          |          | 0.97       | 0.20 | 2        | 4.8        | 7.47E-05 |
| Q13459-1   | Myosin-IXb                                                     | MYO9B     |          | 0.82     | 1.12     | 0.89     | 0.97       | 0.21 | 2        | 1.3        | 5.28E-05 |
| Q8NB37-1   | Parkinson disease 7 domain-containing protein 1                | PDDC1     | 1.13     |          | 0.81     | 1.23     | 0.97       | 0.23 | 4        | 33         | 8.36E-33 |
| Q9HD15     | Steroid receptor RNA activator 1                               | PP7684    |          | 1.19     | 0.75     | 1.33     | 0.97       | 0.31 | 2        | 10         | 1.13E-18 |
| Q6NUK1-1   | Calcium-binding mitochondrial carrier protein SCaMC-1          | APC1      |          | 0.65     | 1.29     | 0.78     | 0.97       | 0.45 | 2        | 6.1        | 2.90E-26 |
| Q5T5Y3-3   | Calmodulin-regulated spectrin-associated protein 1             | CAMSAP1   |          |          | 0.97     | 1.03     | 0.97       |      | 2        | 2          | 5.88E-02 |
| Q6XQN6     | FHA-HIT-interacting protein                                    | FHIP      |          |          | 0.97     | 1.03     | 0.97       |      | 4        | 10         | 8.05E-38 |
| Q01658     | Down-regulator of transcription 1                              | DR1       | 0.97     |          |          |          | 0.97       |      | 2        | 27         | 6.52E-35 |
| Q9H6S0     | Probable ATP-dependent RNA helicase YTHDC2                     | YTHDC2    |          | 0.97     |          |          | 0.97       |      | 2        | 1.6        | 9.71E-24 |
| P57075-1   | Cbl-interacting protein 4                                      | STS2      |          | 0.97     |          |          | 0.97       |      | 2        | 3.5        | 2.02E-15 |
| Q9GZQ      | COMM domain-                                                   | COMM      | 0.97     |          |          |          | 0.97       |      | 2        | 13         | 2.66E-41 |

| UniProt ID | Protein_Name                                                      | Gene Name | F1 (L/H) | F2 (L/H) | R1 (H/L) | R1 (L/H) | Mean (T/U) | S.D. | Pep. No. | %Seq. Cov. | PEP       |
|------------|-------------------------------------------------------------------|-----------|----------|----------|----------|----------|------------|------|----------|------------|-----------|
| 3          | containing protein 5                                              | D5        |          |          |          |          |            |      |          |            |           |
| P37275     | Negative regulator of IL2                                         | AREB6     | 0.97     |          |          |          | 0.97       |      | 2        | 2.2        | 9.10E-05  |
| Q6P4F7     | Rho GTPase-activating protein 11A                                 | ARHGAP11A |          | 0.97     |          |          | 0.97       |      | 2        | 2.3        | 7.78E-05  |
| P55196-5   | Afadin                                                            | AF6       |          | 0.97     |          |          | 0.97       |      | 2        | 1.2        | 1.36E-14  |
| Q96BZ8     | Leukocyte receptor cluster member 1                               | LENG1     | 0.97     |          |          |          | 0.97       |      | 4        | 14         | 2.09E-39  |
| Q96P92     | MBNL protein                                                      | hCG_28028 | 0.97     |          |          |          | 0.97       |      | 6        | 20         | 4.20E-17  |
| A6NJG9     | Putative uncharacterized protein PSME1                            | PSME1     |          | 0.97     |          |          | 0.97       |      | 10       | 47         | 2.93E-84  |
| P27797     | Calregulin                                                        | CALR      | 0.97     | 0.98     | 0.96     | 1.04     | 0.97       | 0.01 | 24       | 70         | 0.00E+00  |
| A8MYA5     | Deubiquitinating enzyme 14                                        | TGT       | 0.96     | 0.96     | 0.99     | 1.01     | 0.97       | 0.02 | 20       | 44         | 1.17E-140 |
| Q9UBQ7     | Glyoxylate reductase/hydroxypyruvate reductase                    | GLXR      | 0.98     | 0.99     | 0.94     | 1.06     | 0.97       | 0.03 | 11       | 50         | 2.41E-304 |
| Q08945     | Chromatin-specific transcription elongation factor 80 kDa subunit | FACT80    | 0.96     | 1.00     | 0.95     | 1.05     | 0.97       | 0.03 | 22       | 32         | 4.54E-212 |
| B0YIW6     | Archain 1, isoform CRA_a                                          | ARCN1     | 0.97     | 0.94     | 1.00     | 1.00     | 0.97       | 0.03 | 15       | 34         | 4.70E-147 |
| P40938     | Activator 1 38 kDa subunit                                        | RFC3      | 0.95     | 1.01     | 0.95     | 1.05     | 0.97       | 0.03 | 13       | 46         | 5.68E-233 |
| O60884     | Cell cycle progression restoration gene 3 protein                 | CPR3      | 0.94     | 0.96     | 1.01     | 0.99     | 0.97       | 0.04 | 10       | 31         | 1.01E-75  |
| Q9UBV8     | PEF protein with a long N-terminal hydrophobic domain             | ABP32     | 1.00     | 0.98     | 0.93     | 1.08     | 0.97       | 0.04 | 5        | 27         | 3.72E-35  |
| P35659     | Protein DEK                                                       | DEK       | 0.92     | 1.00     | 0.99     | 1.01     | 0.97       | 0.04 | 11       | 26         | 1.48E-38  |
| Q96KB5     | Cancer/testis antigen 84                                          | PBK       | 0.93     | 0.96     | 1.02     | 0.98     | 0.97       | 0.05 | 5        | 18         | 1.19E-22  |
| Q8IY71     | MRPS17 protein                                                    | MRPS17    | 0.96     | 1.02     | 0.93     | 1.08     | 0.97       | 0.05 | 2        | 17         | 1.39E-08  |
| Q86WJ1-1   | Amplified in liver cancer protein 1                               | ALC1      | 1.03     | 0.94     | 0.94     | 1.06     | 0.97       | 0.05 | 11       | 14         | 1.92E-39  |
| O75792     | Aicardi-Goutieres syndrome 4 protein                              | RNASEH2A  | 1.01     | 0.99     | 0.91     | 1.10     | 0.97       | 0.05 | 15       | 52         | 1.39E-163 |
| Q9NQS7-1   | Inner centromere protein                                          | INCENP    | 1.01     | 1.01     | 0.89     | 1.12     | 0.97       | 0.07 | 16       | 22         | 1.66E-99  |
| Q14103-3   | AU-rich element RNA-binding protein 1                             | AUF1      | 0.92     | 0.94     | 1.05     | 0.95     | 0.97       | 0.07 | 23       | 55         | 0.00E+00  |
| Q16539-1   | Cytokine suppressive anti-inflammatory drug-binding protein       | CSBP      | 1.05     | 0.94     | 0.92     | 1.09     | 0.97       | 0.07 | 13       | 54         | 2.43E-89  |
| Q13867     | Bleomycin hydrolase                                               | BLMH      | 0.97     | 0.90     | 1.04     | 0.96     | 0.97       | 0.07 | 5        | 13         | 8.67E-24  |



| UniProt ID | Protein_Name                                                        | Gene Name  | F1 (L/H) | F2 (L/H) | R1 (H/L) | R1 (L/H) | Mean (T/U) | S.D. | Pep. No. | %Seq. Cov. | PEP       |
|------------|---------------------------------------------------------------------|------------|----------|----------|----------|----------|------------|------|----------|------------|-----------|
| Q92785     | Apoptosis response zinc finger protein                              | BAF45D     | 0.89     | 0.98     | 1.04     | 0.96     | 0.97       | 0.08 | 7        | 27         | 4.56E-95  |
| O75400-2   | Fas ligand-associated factor 1                                      | FBP11      | 0.92     | 0.91     | 1.08     | 0.93     | 0.97       | 0.10 | 16       | 16         | 5.52E-99  |
| O43395-1   | Pre-mRNA-splicing factor 3                                          | HPRP3      | 0.93     | 0.89     | 1.09     | 0.92     | 0.97       | 0.11 | 11       | 19         | 1.67E-84  |
| O94842     | Epidermal Langerhans cell protein LCP1                              | C14orf92   | 0.97     | 0.86     | 1.08     | 0.93     | 0.97       | 0.11 | 3        | 5.8        | 6.90E-23  |
| Q15257-2   | Phosphotyrosyl phosphatase activator                                | PPP2R4     | 1.01     | 0.84     | 1.06     | 0.94     | 0.97       | 0.12 | 8        | 34         | 7.39E-30  |
| P07737     | Profilin I                                                          | PFN1       | 0.92     | 0.88     | 1.11     | 0.90     | 0.97       | 0.12 | 15       | 75         | 0.00E+00  |
| Q06830     | Natural killer cell-enhancing factor A                              | PAGA       | 0.92     | 0.88     | 1.11     | 0.90     | 0.97       | 0.12 | 21       | 90         | 5.33E-183 |
| Q92614-1   | Molecule associated with JAK3 N-terminus                            | KIAA0216   | 0.92     | 0.86     | 1.13     | 0.88     | 0.97       | 0.14 | 22       | 13         | 6.10E-250 |
| Q96JB5-1   | CDK5 activator-binding protein C53                                  | CDK5RAP3   | 1.12     | 0.96     | 0.83     | 1.20     | 0.97       | 0.15 | 7        | 14         | 2.08E-47  |
| Q9UDR5     | Alpha-aminoadipic semialdehyde synthase, mitochondrial              | AASS       | 1.06     | 1.06     | 0.79     | 1.27     | 0.97       | 0.16 | 5        | 8.6        | 1.44E-11  |
| P46776     | 60S ribosomal protein L27a                                          | RPL27A     | 1.06     | 1.06     | 0.79     | 1.27     | 0.97       | 0.16 | 7        | 38         | 8.81E-132 |
| Q9NTK5-1   | GTP-binding protein 9                                               | GTPBP9     | 1.03     | 1.09     | 0.79     | 1.27     | 0.97       | 0.16 | 9        | 30         | 2.44E-64  |
| Q75MJ1     | ATP-binding cassette, sub-family F (GCN20), member 2, isoform CRA_d | ABCF2      | 1.10     | 1.03     | 0.78     | 1.28     | 0.97       | 0.17 | 6        | 12         | 2.38E-30  |
| P82914     | 28S ribosomal protein S15, mitochondrial                            | DC37       | 0.84     | 0.89     | 1.18     | 0.85     | 0.97       | 0.18 | 5        | 18         | 1.74E-08  |
| Q04917     | 14-3-3 protein eta                                                  | YWHA1      | 0.84     | 0.87     | 1.20     | 0.83     | 0.97       | 0.20 | 19       | 76         | 3.41E-302 |
| Q8N2K0-2   | 2-arachidonoylglycerol hydrolase                                    | ABHD12     | 0.68     | 1.16     | 1.07     | 0.93     | 0.97       | 0.26 | 2        | 7.7        | 2.60E-05  |
| P31146     | Coronin-1A                                                          | CORO1      | 0.81     | 0.83     | 1.27     | 0.79     | 0.97       | 0.26 | 30       | 60         | 1.09E-295 |
| Q2TAL8     | Glutamine-rich protein 1                                            | QRICH1     | 0.87     | 0.77     | 1.27     | 0.79     | 0.97       | 0.26 | 8        | 14         | 8.24E-62  |
| Q9UI30     | TRM112-like protein                                                 | AD-001     | 1.19     | 1.21     | 0.51     | 1.96     | 0.97       | 0.40 | 6        | 59         | 2.98E-82  |
| Q9UBT2     | Anthracycline-associated resistance ARX                             | HRIHFB2115 | 0.78     | 0.70     | 1.43     | 0.70     | 0.97       | 0.40 | 17       | 43         | 1.48E-118 |
| Q13243-1   | Delayed-early protein HRS                                           | HRS        | 0.98     | 0.99     | 0.95     | 1.05     | 0.97       | 0.02 | 7        | 25         | 3.38E-59  |
| Q15459     | Spliceosome-associated protein 114                                  | SAP114     | 0.95     | 0.97     | 1.00     | 1.00     | 0.97       | 0.03 | 28       | 40         | 3.40E-241 |
| Q5JWU6     | Tumor protein D52-like 2                                            | hCG_22755  | 0.97     | 1.00     | 0.95     | 1.05     | 0.97       | 0.03 | 10       | 51         | 1.52E-206 |
| Q13111-1   | Chromatin assembly factor 1 subunit A                               | CAF        | 0.97     | 1.00     | 0.95     | 1.05     | 0.97       | 0.03 | 12       | 21         | 1.39E-169 |
| Q13435     | Pre-mRNA-splicing                                                   | SAP145     | 0.97     | 1.00     | 0.95     | 1.05     | 0.97       | 0.03 | 32       | 42         | 1.69E-240 |

| UniProt ID | Protein_Name                                                                                    | Gene Name | F1 (L/H) | F2 (L/H) | R1 (H/L) | R1 (L/H) | Mean (T/U) | S.D. | Pep. No. | %Seq. Cov. | PEP       |
|------------|-------------------------------------------------------------------------------------------------|-----------|----------|----------|----------|----------|------------|------|----------|------------|-----------|
|            | factor SF3b 145 kDa subunit                                                                     |           |          |          |          |          |            |      |          |            |           |
| B2R5Y4     | cDNA, FLJ92684, highly similar to Homo sapiens IK cytokine, down-regulator of HLA II (IK), mRNA | IK        | 1.01     | 0.93     | 0.98     | 1.02     | 0.97       | 0.04 | 8        | 17         | 7.37E-41  |
| Q9NZ52-1   | ADP-ribosylation factor-binding protein GGA3                                                    | GGA3      | 0.96     | 1.02     | 0.94     | 1.06     | 0.97       | 0.04 | 7        | 14         | 8.30E-20  |
| P26373     | 60S ribosomal protein L13                                                                       | BBC1      | 0.98     | 1.02     | 0.92     | 1.09     | 0.97       | 0.05 | 17       | 49         | 1.86E-137 |
| B4DRE5     | cDNA FLJ55391                                                                                   | FAM54B    | 0.94     | 0.94     | 1.04     | 0.96     | 0.97       | 0.06 | 2        | 5.5        | 3.25E-17  |
| Q99704-1   | Docking protein 1                                                                               | DOK1      | 0.94     | 0.94     | 1.04     | 0.96     | 0.97       | 0.06 | 3        | 13         | 1.70E-19  |
| A6NFX8     | Putative uncharacterized protein NUDT5                                                          | NUDT5     | 1.00     | 1.02     | 0.90     | 1.11     | 0.97       | 0.06 | 12       | 55         | 1.75E-115 |
| Q3B726     | DNA-directed RNA polymerase I subunit RPA43                                                     | TWISTNB   | 1.04     | 0.91     | 0.97     | 1.03     | 0.97       | 0.07 | 2        | 7.7        | 4.75E-08  |
| P25789     | Macropain subunit C9                                                                            | HC9       | 0.91     | 0.96     | 1.05     | 0.95     | 0.97       | 0.07 | 11       | 56         | 6.52E-135 |
| Q9HB07     | UPF0160 protein MYG1, mitochondrial                                                             | C12orf10  | 1.06     | 0.94     | 0.92     | 1.09     | 0.97       | 0.08 | 8        | 28         | 1.27E-49  |
| P42768     | Wiskott-Aldrich syndrome protein                                                                | IMD2      | 0.88     | 1.04     | 1.00     | 1.00     | 0.97       | 0.08 | 3        | 10         | 1.76E-57  |
| Q5VTR2     | E3 ubiquitin-protein ligase BRE1A                                                               | BRE1A     | 0.91     | 0.94     | 1.07     | 0.93     | 0.97       | 0.09 | 16       | 23         | 2.43E-194 |
| Q95747     | Oxidative stress-responsive 1 protein                                                           | KIAA1101  | 0.95     | 0.90     | 1.07     | 0.93     | 0.97       | 0.09 | 9        | 24         | 1.34E-94  |
| P21291     | Cysteine and glycine-rich protein 1                                                             | CSRP      | 0.87     | 1.07     | 0.98     | 1.02     | 0.97       | 0.10 | 3        | 28         | 4.28E-15  |
| Q9NSE4     | Isoleucine--tRNA ligase                                                                         | IARS2     | 0.93     | 0.90     | 1.09     | 0.92     | 0.97       | 0.10 | 20       | 23         | 2.40E-106 |
| Q9Y490     | Talin-1                                                                                         | KIAA1027  | 0.90     | 0.93     | 1.09     | 0.92     | 0.97       | 0.10 | 85       | 52         | 0.00E+00  |
| P11586     | C-1-tetrahydrofolate synthase, cytoplasmic                                                      | MTHFC     | 1.04     | 1.04     | 0.84     | 1.19     | 0.97       | 0.12 | 47       | 52         | 0.00E+00  |
| Q9NZT2-1   | Opioid growth factor receptor                                                                   | OGFR      | 0.91     | 1.11     | 0.90     | 1.11     | 0.97       | 0.12 | 13       | 28         | 4.90E-150 |
| P08621-1   | U1 small nuclear ribonucleoprotein 70 kDa                                                       | RNPU1Z    | 0.88     | 0.93     | 1.11     | 0.90     | 0.97       | 0.12 | 17       | 31         | 7.44E-100 |
| P62829     | 60S ribosomal protein L17                                                                       | RPL23     | 1.08     | 1.01     | 0.83     | 1.20     | 0.97       | 0.13 | 5        | 40         | 2.60E-94  |
| B2RDK6     | cDNA, FLJ96656, highly similar to Homo sapiens SPFH domain family, member 1 (SPFH1), mRNA       | C10orf69  | 1.09     | 1.01     | 0.82     | 1.22     | 0.97       | 0.14 | 8        | 22         | 1.22E-90  |

| UniProt ID | Protein_Name                                                                                  | Gene Name | F1 (L/H) | F2 (L/H) | R1 (H/L) | R1 (L/H) | Mean (T/U) | S.D. | Pep. No. | %Seq. Cov. | PEP       |
|------------|-----------------------------------------------------------------------------------------------|-----------|----------|----------|----------|----------|------------|------|----------|------------|-----------|
| P49354-1   | CAAX farnesyltransferase subunit alpha                                                        | FNTA      | 1.08     | 0.79     | 1.05     | 0.95     | 0.97       | 0.16 | 5        | 17         | 6.45E-250 |
| P62263     | 40S ribosomal protein S14                                                                     | PRO2640   | 1.06     | 1.08     | 0.78     | 1.28     | 0.97       | 0.17 | 11       | 69         | 1.56E-230 |
| Q9Y3X0     | Coiled-coil domain-containing protein 9                                                       | CCDC9     | 0.96     | 1.15     | 0.81     | 1.23     | 0.97       | 0.17 | 3        | 6          | 3.46E-15  |
| P40925     | Cytosolic malate dehydrogenase                                                                | MDH1      | 0.86     | 0.89     | 1.17     | 0.85     | 0.97       | 0.17 | 13       | 42         | 3.68E-160 |
| O75964     | ATP synthase subunit g, mitochondrial                                                         | ATP5L     | 1.02     | 1.12     | 0.78     | 1.28     | 0.97       | 0.17 | 4        | 48         | 1.60E-40  |
| Q9H2W6     | 39S ribosomal protein L46, mitochondrial                                                      | C15orf4   | 0.85     | 0.87     | 1.20     | 0.83     | 0.97       | 0.20 | 7        | 35         | 1.04E-74  |
| A8MY Y8    | Actin-related protein 2/3 complex subunit 3                                                   | ARC21     | 0.77     | 0.96     | 1.19     | 0.84     | 0.97       | 0.21 | 4        | 26         | 3.15E-29  |
| Q8NDH8     | Chromosome transmission fidelity protein 8 homolog                                            | CHTF8     | 0.90     | 0.77     | 1.25     | 0.80     | 0.97       | 0.25 | 7        | 22         | 3.05E-30  |
| O95319-4   | Bruno-like protein 3                                                                          | BRUNOL3   | 0.86     | 0.79     | 1.27     | 0.79     | 0.97       | 0.26 | 8        | 17         | 9.29E-171 |
| Q9NXV6     | CDKN2A-interacting protein                                                                    | CARF      | 0.84     | 0.80     | 1.28     | 0.78     | 0.97       | 0.27 | 12       | 29         | 9.29E-129 |
| P36639-1   | 7,8-dihydro-8-oxoguanine triphosphatase                                                       | MTH1      | 0.80     | 0.83     | 1.29     | 0.78     | 0.97       | 0.27 | 5        | 27         | 1.34E-62  |
| P53701     | Cytochrome c-type heme lyase                                                                  | CCHL      | 1.07     | 1.22     | 0.63     | 1.59     | 0.97       | 0.31 | 3        | 13         | 6.36E-17  |
| Q9NW B6-1  | Arginine and glutamate-rich protein 1                                                         | ARGLU1    | 0.62     | 0.87     | 1.43     | 0.70     | 0.97       | 0.41 | 5        | 15         | 3.61E-06  |
| O60664-1   | 47 kDa mannose 6-phosphate receptor-binding protein                                           | M6PRBP1   | 0.67     | 0.73     | 1.52     | 0.66     | 0.97       | 0.47 | 18       | 63         | 4.83E-279 |
| Q5TDF0     | Chromosome 1 open reading frame 57                                                            | C1orf57   |          | 1.13     | 0.82     | 1.22     | 0.98       | 0.22 | 4        | 25         | 4.86E-34  |
| Q00765     | Polyposis locus protein 1                                                                     | C5orf18   | 0.99     | 0.96     |          |          | 0.98       | 0.02 | 3        | 11         | 1.53E-08  |
| B4E1X0     | cDNA FLJ61047, weakly similar to Homo sapiens RAS and EF-hand domain containing (RASEF), mRNA | EFCAB4B   |          | 0.81     | 1.14     | 0.88     | 0.98       | 0.23 | 2        | 4.5        | 1.82E-06  |
| Q96BM9     | ADP-ribosylation factor-like protein 10B                                                      | ARL10B    | 1.14     | 0.81     |          |          | 0.98       | 0.23 | 5        | 37         | 1.31E-12  |
| Q9Y2U5     | MAPK/ERK kinase 2                                                                             | MAP3K2    |          | 1.02     | 0.93     | 1.08     | 0.98       | 0.06 | 2        | 3.4        | 3.24E-05  |
| Q9UNF0-1   | Protein kinase C and casein kinase substrate in neurons protein 2                             | PACSI N2  |          | 0.91     | 1.04     | 0.96     | 0.98       | 0.09 | 2        | 4.1        | 1.03E-07  |
| P39880-3   | CCAAT displacement protein                                                                    | CUTL1     |          | 0.91     | 1.04     | 0.96     | 0.98       | 0.09 | 5        | 4.2        | 3.03E-20  |
| P80217-    | Interferon-induced 35                                                                         | IFI35     |          | 1.05     | 0.90     | 1.11     | 0.98       | 0.11 | 7        | 27         | 1.72E-53  |

| UniProt ID | Protein_Name                                                                   | Gene Name | F1 (L/H) | F2 (L/H) | R1 (H/L) | R1 (L/H) | Mean (T/U) | S.D. | Pep. No. | %Seq. Cov. | PEP       |
|------------|--------------------------------------------------------------------------------|-----------|----------|----------|----------|----------|------------|------|----------|------------|-----------|
| 1          | kDa protein                                                                    |           |          |          |          |          |            |      |          |            |           |
| P61513     | 60S ribosomal protein L37a                                                     | RPL37A    | 0.89     | 1.06     |          |          | 0.98       | 0.12 | 5        | 51         | 2.75E-54  |
| Q92540-4   | EST1-like protein C                                                            | C1orf16   |          | 0.84     | 1.11     | 0.90     | 0.98       | 0.19 | 2        | 2.8        | 6.73E-06  |
| P13639     | Elongation factor 2                                                            | EEF2      | 0.97     | 0.98     | 0.98     | 1.02     | 0.98       | 0.01 | 63       | 73         | 0.00E+00  |
| Q9Y2W2     | Npw38-binding protein                                                          | NPWP      | 0.97     | 0.96     | 1.00     | 1.00     | 0.98       | 0.02 | 13       | 26         | 3.11E-56  |
| B5BU19     | SHC-transforming protein 1                                                     | SHC1      | 0.99     | 0.99     | 0.95     | 1.05     | 0.98       | 0.02 | 2        | 9.8        | 1.23E-35  |
| Q9NTX5-1   | Enoyl-CoA hydratase domain-containing protein 1                                | ECHDC1    | 0.95     | 1.02     | 0.96     | 1.04     | 0.98       | 0.04 | 8        | 35         | 1.78E-162 |
| P78417     | Glutathione S-transferase omega-1                                              | GSTO1     | 0.93     | 0.99     | 1.01     | 0.99     | 0.98       | 0.04 | 14       | 51         | 2.71E-73  |
| O95674-1   | CDP-DAG synthase 2                                                             | CDS2      | 0.99     | 1.02     | 0.92     | 1.09     | 0.98       | 0.05 | 2        | 11         | 4.17E-15  |
| P62249     | 40S ribosomal protein S16                                                      | RPS16     | 1.03     | 0.98     | 0.92     | 1.09     | 0.98       | 0.06 | 9        | 50         | 3.47E-34  |
| P51991-1   | Heterogeneous nuclear ribonucleoprotein A3                                     | HNRNP A3  | 0.91     | 1.01     | 1.01     | 0.99     | 0.98       | 0.06 | 22       | 44         | 1.84E-298 |
| Q8WXE0     | Caskin-2                                                                       | CASKI N2  | 0.95     | 0.93     | 1.05     | 0.95     | 0.98       | 0.06 | 2        | 3.7        | 3.10E-04  |
| B4DVA7     | cDNA FLJ53927, highly similar to Beta-hexosaminidase alpha chain (EC 3.2.1.52) | HEXA      | 1.04     | 0.90     | 0.99     | 1.01     | 0.98       | 0.07 | 3        | 10         | 8.76E-19  |
| P48643     | CCT-epsilon                                                                    | CCT5      | 1.03     | 1.02     | 0.88     | 1.14     | 0.98       | 0.08 | 37       | 73         | 0.00E+00  |
| Q9HB71-1   | Calcyclin-binding protein                                                      | CACYBP    | 1.07     | 1.02     | 0.84     | 1.19     | 0.98       | 0.12 | 17       | 62         | 1.01E-202 |
| P10644     | cAMP-dependent protein kinase type I-alpha regulatory subunit                  | PKR1      | 0.87     | 0.91     | 1.15     | 0.87     | 0.98       | 0.15 | 9        | 29         | 5.79E-100 |
| Q6LES2     | Annexin A4                                                                     | ANXA4     | 0.86     | 0.91     | 1.16     | 0.86     | 0.98       | 0.16 | 6        | 21         | 2.59E-153 |
| P52907     | F-actin-capping protein subunit alpha-1                                        | CAPZA1    | 0.85     | 0.92     | 1.16     | 0.86     | 0.98       | 0.16 | 14       | 70         | 2.62E-224 |
| Q9MYF2     | MHC class I antigen B                                                          | HLA-B     | 0.83     | 0.92     | 1.18     | 0.85     | 0.98       | 0.18 | 7        | 47         | 3.79E-66  |
| P62306     | Sm protein F                                                                   | PBSCF     | 1.04     | 1.14     | 0.75     | 1.33     | 0.98       | 0.20 | 5        | 50         | 1.38E-92  |
| Q9Y2U8     | Inner nuclear membrane protein Man1                                            | LEMD3     | 0.74     | 1.05     | 1.14     | 0.88     | 0.98       | 0.21 | 2        | 2.1        | 8.14E-03  |
| P32119     | Natural killer cell-enhancing factor B                                         | NKEFB     | 0.86     | 0.85     | 1.22     | 0.82     | 0.98       | 0.21 | 16       | 68         | 1.43E-210 |
| P16949     | Leukemia-associated phosphoprotein p18                                         | LAP18     | 0.81     | 0.90     | 1.22     | 0.82     | 0.98       | 0.22 | 15       | 62         | 1.80E-139 |
| O14828-1   | Secretory carrier-associated membrane protein 3                                | C1orf3    | 1.15     | 1.06     | 0.72     | 1.39     | 0.98       | 0.23 | 5        | 27         | 7.49E-75  |
| P35573-    | 4-alpha-                                                                       | AGL       | 1.06     | 1.15     | 0.72     | 1.39     | 0.98       | 0.23 | 7        | 7.1        | 2.44E-80  |

| UniProt ID | Protein_Name                                                         | Gene Name     | F1 (L/H) | F2 (L/H) | R1 (H/L) | R1 (L/H) | Mean (T/U) | S.D. | Pep. No. | %Seq. Cov. | PEP       |
|------------|----------------------------------------------------------------------|---------------|----------|----------|----------|----------|------------|------|----------|------------|-----------|
| 1          | glucanotransferase                                                   |               |          |          |          |          |            |      |          |            |           |
| Q9BTT0     | Acidic leucine-rich nuclear phosphoprotein 32 family member E        | ANP32E        | 0.82     | 0.87     | 1.24     | 0.81     | 0.98       | 0.23 | 7        | 30         | 0.00E+00  |
| Q6MZT3     | Putative uncharacterized protein DKFZp686C1054                       | DKFZp686C1054 | 0.81     | 0.84     | 1.28     | 0.78     | 0.98       | 0.26 | 4        | 12         | 8.92E-68  |
| Q9NVA2-2   | Septin-11                                                            | 41163         | 0.85     | 0.80     | 1.28     | 0.78     | 0.98       | 0.26 | 10       | 23         | 2.74E-148 |
| O60573     | eIF4E-like protein 4E-LP                                             | EIF4E2        | 1.31     | 0.90     | 0.72     | 1.39     | 0.98       | 0.30 | 7        | 40         | 6.83E-34  |
| Q92783-1   | Signal transducing adapter molecule 1                                | STAM          | 0.92     | 0.63     | 1.38     | 0.72     | 0.98       | 0.38 | 2        | 5.2        | 7.55E-18  |
| O43707     | Alpha-actinin-4                                                      | ACTN4         | 0.72     | 0.75     | 1.46     | 0.68     | 0.98       | 0.42 | 54       | 67         | 0.00E+00  |
| Q9H7N4     | Serine arginine-rich pre-mRNA splicing factor SR-A1                  | SCAF1         | 1.47     | 0.89     | 0.57     | 1.75     | 0.98       | 0.46 | 2        | 3          | 7.25E-15  |
| P20810-6   | Calpain inhibitor                                                    | CAST          | 0.57     | 0.72     | 1.64     | 0.61     | 0.98       | 0.58 | 5        | 8.3        | 4.61E-14  |
| Q13330-1   | Metastasis-associated protein MTA1                                   | MTA1          | 0.92     | 1.05     | 0.96     | 1.04     | 0.98       | 0.07 | 11       | 18         | 3.34E-73  |
| P62277     | 40S ribosomal protein S13                                            | RPS13         | 0.98     | 1.05     | 0.90     | 1.11     | 0.98       | 0.08 | 8        | 46         | 3.03E-124 |
| P62241     | 40S ribosomal protein S8                                             | OK/SW-cl.83   | 1.04     | 1.00     | 0.89     | 1.12     | 0.98       | 0.08 | 12       | 59         | 1.49E-266 |
| Q7RTV0     | PHD finger-like domain-containing protein 5A                         | PHF5A         | 0.96     | 0.89     | 1.08     | 0.93     | 0.98       | 0.10 | 5        | 42         | 1.89E-56  |
| Q9UKY7-1   | Protein CDV3 homolog                                                 | CDV3          | 0.95     | 1.09     | 0.89     | 1.12     | 0.98       | 0.10 | 8        | 63         | 2.26E-52  |
| P43686-1   | 26S protease regulatory subunit 6B                                   | MIP224        | 1.00     | 1.07     | 0.86     | 1.16     | 0.98       | 0.11 | 21       | 60         | 0.00E+00  |
| B4E0Q6     | cDNA FLJ60209, highly similar to Transcriptional repressor p66 alpha | GATA D2A      | 0.89     | 0.94     | 1.10     | 0.91     | 0.98       | 0.11 | 12       | 24         | 1.61E-50  |
| Q9NUP9     | Mammalian lin-seven protein 3                                        | LIN7C         | 1.01     | 1.10     | 0.82     | 1.22     | 0.98       | 0.14 | 4        | 22         | 5.85E-14  |
| Q96I25     | 45 kDa-splicing factor                                               | RBM17         | 0.83     | 1.12     | 0.98     | 1.02     | 0.98       | 0.15 | 6        | 15         | 3.45E-12  |
| O15533-3   | NGS-17                                                               | NGS17         | 1.26     | 0.77     | 0.90     | 1.11     | 0.98       | 0.25 | 5        | 14         | 3.91E-21  |
| P82979     | Cytokine-induced protein of 29 kDa                                   | HSPC316       | 0.82     | 0.94     | 1.18     | 0.85     | 0.98       | 0.18 | 6        | 16         | 1.22E-158 |
| Q3KQZ2     | SYNGR2 protein                                                       | SYNGR2        | 0.97     | 1.17     | 0.8      | 1.25     | 0.98       | 0.19 | 3        | 10         | 6.76E-08  |
| P49917     | DNA ligase 4                                                         | LIG4          |          | 0.99     | 0.97     | 1.03     | 0.98       | 0.01 | 2        | 2.4        | 1.49E-16  |
| P22059-1   | Oxysterol-binding protein 1                                          | OSBP          | 0.98     | 0.96     | 1.00     | 1.00     | 0.98       | 0.02 | 9        | 18         | 4.04E-94  |
| Q86YH3     | EARS2 protein                                                        | EARS2         | 0.96     | 1.00     |          |          | 0.98       | 0.03 | 2        | 3.4        | 8.49E-05  |

| UniProt ID | Protein_Name                                                | Gene Name | F1 (L/H) | F2 (L/H) | R1 (H/L) | R1 (L/H) | Mean (T/U) | S.D. | Pep. No. | %Seq. Cov. | PEP       |
|------------|-------------------------------------------------------------|-----------|----------|----------|----------|----------|------------|------|----------|------------|-----------|
| P10412     | Histone H1.4                                                | H1F4      | 0.96     | 1.00     |          |          | 0.98       | 0.03 | 15       | 41         | 2.44E-213 |
| Q9NQG5     | Cell cycle-related and expression-elevated protein in tumor | C20orf77  | 0.95     | 0.98     | 1.01     | 0.99     | 0.98       | 0.03 | 12       | 50         | 1.90E-187 |
| Q86XP3-1   | ATP-dependent RNA helicase DDX42                            | DDX42     | 0.95     | 0.98     | 1.01     | 0.99     | 0.98       | 0.03 | 21       | 35         | 6.59E-188 |
| O60264     | Sucrose nonfermenting protein 2 homolog                     | SMARCA5   | 0.95     | 0.98     | 1.01     | 0.99     | 0.98       | 0.03 | 35       | 33         | 1.03E-234 |
| O95429     | BAG family molecular chaperone regulator 4                  | BAG4      | 0.96     | 1.02     | 0.96     | 1.04     | 0.98       | 0.03 | 2        | 5.3        | 2.03E-17  |
| Q16878     | Cysteine dioxygenase type 1                                 | CDO1      | 0.96     | 1.02     | 0.96     | 1.04     | 0.98       | 0.03 | 2        | 7.5        | 1.71E-02  |
| Q9BW85     | Coiled-coil domain-containing protein 94                    | CCDC94    | 0.96     | 1.02     | 0.96     | 1.04     | 0.98       | 0.03 | 5        | 23         | 3.57E-21  |
| Q8IXQ4-1   | Lipopolysaccharide-specific response protein 7              | AD029     | 0.96     | 1.02     | 0.96     | 1.04     | 0.98       | 0.03 | 5        | 14         | 5.33E-11  |
| B1AK88     | Capping protein (Actin filament) muscle Z-line, beta        | CAPZB     | 0.96     | 1.02     | 0.96     | 1.04     | 0.98       | 0.03 | 27       | 54         | 0.00E+00  |
| P55789     | Augmenter of liver regeneration                             | ALR       | 1.00     | 1.00     | 0.94     | 1.06     | 0.98       | 0.03 | 3        | 13         | 2.34E-32  |
| Q96F07-2   | Cytoplasmic FMR1-interacting protein 2                      | CYFIP2    | 1.00     | 1.00     | 0.94     | 1.06     | 0.98       | 0.03 | 6        | 5.5        | 1.19E-17  |
| Q8IVD9     | NudC domain-containing protein 3                            | KIAA1068  | 0.98     | 1.02     | 0.94     | 1.06     | 0.98       | 0.04 | 2        | 6.9        | 1.83E-11  |
| B7Z5E3     | L-lactate dehydrogenase                                     | LDHA      | 1.00     | 1.01     | 0.93     | 1.08     | 0.98       | 0.04 | 29       | 81         | 0.00E+00  |
| P62913-1   | 60S ribosomal protein L11                                   | RPL11     | 0.93     | 1.03     | 0.98     | 1.02     | 0.98       | 0.05 | 8        | 48         | 7.63E-119 |
| P78371     | CCT-beta                                                    | 99D8.1    | 1.01     | 1.01     | 0.92     | 1.09     | 0.98       | 0.05 | 38       | 75         | 0.00E+00  |
| Q15631     | Translin                                                    | TSN       | 0.96     | 0.94     | 1.04     | 0.96     | 0.98       | 0.05 | 9        | 44         | 1.30E-149 |
| Q5HY81     | Ubiquitin-like 4A                                           | UBL4A     | 1.00     | 0.92     | 1.02     | 0.98     | 0.98       | 0.05 | 3        | 19         | 8.14E-45  |
| Q96SZ5     | 2-aminoethanethiol dioxygenase                              | ADO       |          | 1.02     | 0.94     | 1.06     | 0.98       | 0.06 | 5        | 22         | 8.33E-91  |
| Q9BRA2     | 14 kDa thioredoxin-related protein                          | TXNDC17   | 1.03     | 1.05     | 0.86     | 1.16     | 0.98       | 0.10 | 4        | 38         | 4.77E-51  |
| P62854     | 40S ribosomal protein S26                                   | RPS26     | 1.06     | 1.02     | 0.86     | 1.16     | 0.98       | 0.11 | 2        | 21         | 1.80E-29  |
| Q8NB15-2   | Zinc finger protein 511                                     | ZNF511    | 1.05     | 1.05     | 0.84     | 1.19     | 0.98       | 0.12 | 3        | 21         | 2.54E-06  |
| P50990     | CCT-theta                                                   | C21orf112 | 1.02     | 1.08     | 0.84     | 1.19     | 0.98       | 0.12 | 42       | 85         | 0.00E+00  |
| A2VCT3     | OGDH protein                                                | OGDH      | 0.86     | 0.96     | 1.12     | 0.89     | 0.98       | 0.13 | 11       | 13         | 2.73E-47  |
| B4DE31     | Transketolase                                               | TKT       | 0.87     | 0.89     | 1.18     | 0.85     | 0.98       | 0.17 | 31       | 56         | 0.00E+00  |
| Q9Y6D6     | Brefeldin A-inhibited guanine nucleotide-exchange protein 1 | ARFGEF1   | 0.90     | 0.86     | 1.18     | 0.85     | 0.98       | 0.17 | 4        | 3          | 5.44E-36  |
| B4DT51     | cDNA FLJ54848,                                              | LENG5     | 1.12     |          | 0.84     | 1.19     | 0.98       | 0.20 | 2        | 8.7        | 1.10E-11  |

| UniProt ID | Protein_Name                                                                                     | Gene Name | F1 (L/H) | F2 (L/H) | R1 (H/L) | R1 (L/H) | Mean (T/U) | S.D. | Pep. No. | %Seq. Cov. | PEP       |
|------------|--------------------------------------------------------------------------------------------------|-----------|----------|----------|----------|----------|------------|------|----------|------------|-----------|
|            | highly similar to tRNA-splicing endonuclease subunit Sen34 (EC 3.1.27.9)                         |           |          |          |          |          |            |      |          |            |           |
| Q8IUF8-1   | Mineral dust-induced gene protein                                                                | MDIG      | 1.12     |          | 0.84     | 1.19     | 0.98       | 0.20 | 7        | 22         | 1.53E-12  |
| P54619     | 5-AMP-activated protein kinase subunit gamma-1                                                   | PRKAG1    | 0.82     | 0.91     | 1.21     | 0.83     | 0.98       | 0.20 | 3        | 9.1        | 1.08E-09  |
| Q9BRF8-1   | Calcineurin-like phosphoesterase domain-containing protein 1                                     | CPPED1    | 0.85     | 0.87     | 1.22     | 0.82     | 0.98       | 0.21 | 4        | 20         | 1.62E-64  |
| P13796     | LC64P                                                                                            | LCP1      | 0.84     | 0.88     | 1.22     | 0.82     | 0.98       | 0.21 | 49       | 84         | 0.00E+00  |
| P54727     | UV excision repair protein RAD23 homolog B                                                       | RAD23B    | 1.07     | 1.14     | 0.73     | 1.37     | 0.98       | 0.22 | 11       | 40         | 6.79E-61  |
| P52298-1   | 20 kDa nuclear cap-binding protein                                                               | CBP20     | 0.76     | 1.23     | 0.95     | 1.05     | 0.98       | 0.24 | 3        | 22         | 1.86E-20  |
| C9JIF9     | Putative uncharacterized protein APEH                                                            | APEH      | 0.81     | 0.88     | 1.25     | 0.80     | 0.98       | 0.24 | 9        | 17         | 1.77E-64  |
| Q9UNX4     | WD repeat-containing protein 3                                                                   | WDR3      | 1.19     | 1.12     | 0.63     | 1.59     | 0.98       | 0.31 | 4        | 7.3        | 6.83E-31  |
| P60981     | Actin-depolymerizing factor                                                                      | ACTDP     | 0.80     | 0.73     | 1.41     | 0.71     | 0.98       | 0.37 | 3        | 25         | 1.04E-31  |
| P22033     | Methylmalonyl-CoA isomerase                                                                      | MUT       | 0.75     | 0.76     | 1.43     | 0.70     | 0.98       | 0.39 | 4        | 6.1        | 1.57E-11  |
| P13804     | Electron transfer flavoprotein subunit alpha, mitochondrial                                      | ETF A     | 0.73     | 0.70     | 1.51     | 0.66     | 0.98       | 0.46 | 14       | 61         | 2.11E-242 |
| P19793     | Nuclear receptor subfamily 2 group B member 1                                                    | NR2B1     |          |          | 0.98     | 1.02     | 0.98       |      | 2        | 6.7        | 1.03E-21  |
| P15531     | Nucleoside-diphosphate kinase 7 isoform a variant                                                | NME7a     |          |          | 0.98     | 1.02     | 0.98       |      | 2        | 8.5        | 7.85E-04  |
| C9JCT9     | Genetic suppressor element 1                                                                     | GSE1      |          |          | 0.98     | 1.02     | 0.98       |      | 3        | 5.5        | 1.91E-05  |
| Q9H223     | EH domain-containing protein 4                                                                   | EHD4      |          |          | 0.98     | 1.02     | 0.98       |      | 4        | 8.7        | 1.60E-18  |
| Q9Y237-2   | Parvulin-14                                                                                      | PIN4      | 0.98     |          |          |          | 0.98       |      | 2        | 15         | 1.73E-27  |
| Q9NZD8     | Acid cluster protein 33                                                                          | ACP33     | 0.98     |          |          |          | 0.98       |      | 2        | 11         | 3.94E-12  |
| A6NDU8     | UPF0600 protein C5orf51                                                                          | C5orf51   | 0.98     |          |          |          | 0.98       |      | 2        | 15         | 2.04E-29  |
| Q9H8D6     | cDNA FLJ13729 fis, clone PLACE3000121, weakly similar to VESICULAR TRAFFIC CONTROL PROTEIN SEC15 | EXOC6B    |          | 0.98     |          |          | 0.98       |      | 2        | 2.2        | 2.41E-04  |

| UniProt ID | Protein_Name                                                                                                  | Gene Name   | F1 (L/H) | F2 (L/H) | R1 (H/L) | R1 (L/H) | Mean (T/U) | S.D. | Pep. No. | %Seq. Cov. | PEP       |
|------------|---------------------------------------------------------------------------------------------------------------|-------------|----------|----------|----------|----------|------------|------|----------|------------|-----------|
| P83881     | 60S ribosomal protein L36a                                                                                    | GIG15       | 0.98     |          |          |          | 0.98       |      | 4        | 38         | 2.03E-07  |
| Q15435-1   | Protein phosphatase 1 regulatory subunit 22                                                                   | PPP1R7      | 1.00     | 1.03     | 0.91     | 1.10     | 0.98       | 0.06 | 6        | 20         | 5.17E-231 |
| Q9H836     | cDNA FLJ13963 fis, clone Y79AA1001299, highly similar to Homo sapiens integrase interactor 1b protein (INI1B) | BAF47       | 0.88     | 0.99     | 1.07     | 0.93     | 0.98       | 0.10 | 6        | 19         | 7.40E-93  |
| Q9NUU7     | ATP-dependent RNA helicase DDX19A                                                                             | DDX19A      | 0.88     | 0.99     | 1.07     | 0.93     | 0.98       | 0.10 | 7        | 15         | 1.87E-62  |
| Q9HAV4-1   | Exportin-5                                                                                                    | KIAA1291    | 1.03     | 1.04     | 0.87     | 1.15     | 0.98       | 0.10 | 16       | 18         | 4.38E-268 |
| Q86W42-1   | Functional spliceosome-associated protein 35                                                                  | PSEC006     | 0.94     | 0.91     | 1.09     | 0.92     | 0.98       | 0.10 | 9        | 36         | 1.49E-43  |
| Q9BU89     | Deoxyhypusine dioxygenase                                                                                     | DOHH        | 1.10     | 0.91     | 0.93     | 1.08     | 0.98       | 0.10 | 8        | 47         | 6.95E-93  |
| Q13642-2   | Four and a half LIM domains protein 1                                                                         | FHL1        | 0.84     | 1.03     | 1.07     | 0.93     | 0.98       | 0.12 | 2        | 6.5        | 8.91E-06  |
| B4DSZ4     | Ubiquitin carrier protein                                                                                     | UBCE7       | 1.08     | 1.07     | 0.79     | 1.27     | 0.98       | 0.16 | 6        | 41         | 2.57E-63  |
| A5YKK6-1   | CCR4-associated factor 1                                                                                      | AD-005      | 1.04     | 1.12     | 0.78     | 1.28     | 0.98       | 0.18 | 10       | 5          | 4.51E-41  |
| Q16269     | RCC1-I                                                                                                        | RCC1        | 1.01     | 1.04     | 0.90     | 1.11     | 0.98       | 0.07 | 10       | 34         | 1.03E-153 |
| Q9Y2Z0-1   | Protein 40-6-3                                                                                                | SUGT1       | 1.11     | 0.98     | 0.86     | 1.16     | 0.98       | 0.13 | 13       | 41         | 2.62E-245 |
| Q16698     | 2,4-dienoyl-CoA reductase [NADPH]                                                                             | DECR        | 0.82     | 0.94     | 1.19     | 0.84     | 0.98       | 0.19 | 8        | 31         | 1.45E-159 |
| Q96MG7     | Hepatocellular carcinoma-associated protein 4                                                                 | HCA4        | 1.07     | 1.31     | 0.57     | 1.75     | 0.98       | 0.38 | 3        | 14         | 3.90E-42  |
| Q12905     | Interleukin enhancer-binding factor 2                                                                         | ILF2        | 0.95     | 1.00     | 1.00     | 1.00     | 0.98       | 0.03 | 15       | 53         | 2.06E-171 |
| O60499-1   | Syntaxin-10                                                                                                   | STX10       | 1.00     | 1.00     | 0.95     | 1.05     | 0.98       | 0.03 | 2        | 11         | 1.31E-56  |
| Q13263-1   | KRAB-associated protein 1                                                                                     | KAP1        | 0.96     | 1.02     | 0.97     | 1.03     | 0.98       | 0.03 | 30       | 45         | 2.35E-269 |
| P83876     | DIM1 protein homolog                                                                                          | DIM1        | 0.97     | 1.02     | 0.96     | 1.04     | 0.98       | 0.03 | 3        | 34         | 1.16E-33  |
| A6NF09     | Putative uncharacterized protein SRPK2                                                                        | hCG_2013856 | 1.04     | 0.95     | 0.96     | 1.04     | 0.98       | 0.05 | 3        | 5.1        | 1.03E-06  |
| O75663-1   | Putative MAPK-activating protein PM10                                                                         | TIPRL       | 0.99     | 0.93     | 1.03     | 0.97     | 0.98       | 0.05 | 11       | 54         | 2.34E-39  |
| Q99832     | HIV-1 Nef-interacting protein                                                                                 | CCT7        | 1.02     | 1.01     | 0.92     | 1.09     | 0.98       | 0.06 | 32       | 74         | 0.00E+00  |
| B4DVB8     | cDNA FLJ60076, highly similar to ELAV-like protein 1                                                          | ELAVL1      | 0.92     | 1.00     | 1.03     | 0.97     | 0.98       | 0.06 | 17       | 54         | 6.96E-158 |



| UniProt ID | Protein_Name                                                  | Gene Name | F1 (L/H) | F2 (L/H) | R1 (H/L) | R1 (L/H) | Mean (T/U) | S.D. | Pep. No. | %Seq. Cov. | PEP       |
|------------|---------------------------------------------------------------|-----------|----------|----------|----------|----------|------------|------|----------|------------|-----------|
| Q9NW13     | RNA-binding motif protein 28                                  | RBM28     | 1.00     | 1.03     | 0.92     | 1.09     | 0.98       | 0.06 | 19       | 29         | 3.60E-155 |
| Q53FT3     | Uncharacterized protein C11orf73                              | C11orf73  | 0.95     | 0.95     | 1.05     | 0.95     | 0.98       | 0.06 | 4        | 16         | 9.71E-44  |
| Q13427-1   | CASP10                                                        | PPIG      | 0.93     | 0.96     | 1.06     | 0.94     | 0.98       | 0.07 | 11       | 12         | 8.94E-36  |
| Q6NVY1-1   | 3-hydroxyisobutyryl-CoA hydrolase, mitochondrial              | HIBCH     | 1.03     | 1.03     | 0.89     | 1.12     | 0.98       | 0.08 | 9        | 29         | 1.42E-95  |
| P50991     | Stimulator of TAR RNA-binding                                 | CCT4      | 1.04     | 1.02     | 0.89     | 1.12     | 0.98       | 0.08 | 29       | 64         | 0.00E+00  |
| O94979-8   | ABP125                                                        | HSPC275   | 0.95     | 0.92     | 1.08     | 0.93     | 0.98       | 0.09 | 7        | 6.2        | 8.17E-24  |
| Q9HCS7     | Pre-mRNA-splicing factor SYF1                                 | HCNP      | 0.90     | 0.97     | 1.08     | 0.93     | 0.98       | 0.09 | 15       | 23         | 3.81E-122 |
| Q6UN15-1   | Factor interacting with PAP                                   | FIP1      | 0.95     | 0.91     | 1.09     | 0.92     | 0.98       | 0.09 | 10       | 28         | 2.88E-161 |
| Q96GD0     | Pyridoxal phosphate phosphatase                               | PDXP      | 1.01     | 0.87     | 1.07     | 0.93     | 0.98       | 0.10 | 8        | 37         | 1.52E-106 |
| Q96NC0     | Zinc finger matrin-type protein 2                             | ZMAT2     | 0.89     | 0.96     | 1.10     | 0.91     | 0.98       | 0.11 | 5        | 20         | 2.63E-07  |
| Q9UI10-2   | eIF-2B GDP-GTP exchange factor subunit delta                  | EIF2B4    | 1.06     | 1.04     | 0.85     | 1.18     | 0.98       | 0.12 | 6        | 20         | 1.29E-43  |
| Q16718     | Complex I subunit B13                                         | NDUF A5   | 0.90     | 0.92     | 1.13     | 0.88     | 0.98       | 0.13 | 6        | 66         | 3.65E-107 |
| P25440-2   | Bromodomain-containing protein 2                              | BRD2      | 0.83     | 1.12     | 1        | 1.00     | 0.98       | 0.15 | 8        | 10         | 8.39E-33  |
| P49770     | eIF-2B GDP-GTP exchange factor subunit beta                   | EIF2B2    | 1.07     | 1.11     | 0.77     | 1.30     | 0.98       | 0.19 | 8        | 27         | 1.16E-68  |
| Q06203     | Amidophosphoribosyl transferase                               | GPAT      | 0.86     | 0.88     | 1.21     | 0.83     | 0.98       | 0.20 | 5        | 12         | 1.59E-73  |
| P10515     | 70 kDa mitochondrial autoantigen of primary biliary cirrhosis | DLAT      | 0.84     | 0.89     | 1.22     | 0.82     | 0.98       | 0.21 | 10       | 21         | 1.20E-137 |
| Q14684-1   | Ribosomal RNA processing protein 1 homolog B                  | KIAA0179  | 1.16     | 1.05     | 0.74     | 1.35     | 0.98       | 0.22 | 15       | 24         | 2.23E-105 |
| Q16543     | Hsp90 chaperone protein kinase-targeting subunit              | CDC37     | 1.04     | 1.17     | 0.74     | 1.35     | 0.98       | 0.22 | 16       | 43         | 1.68E-130 |
| P61158     | Actin-like protein 3                                          | ACTR3     | 0.84     | 0.85     | 1.26     | 0.79     | 0.98       | 0.24 | 20       | 64         | 5.05E-186 |
| P55327-3   | Protein N8                                                    | TPD52     | 0.82     | 0.86     | 1.27     | 0.79     | 0.98       | 0.25 | 11       | 58         | 0.00E+00  |
| Q9Y657     | Ovarian cancer-related protein                                | OCR       | 0.83     | 0.84     | 1.28     | 0.78     | 0.98       | 0.26 | 3        | 18         | 2.87E-15  |
| Q9UQE7     | Basement membrane-associated chondroitin proteoglycan         | BAM       | 0.81     | 0.82     | 1.32     | 0.76     | 0.98       | 0.29 | 39       | 38         | 0.00E+00  |
| Q96GD4     | Aurora- and IPL1-like midbody-associated protein 1            | AIK2      | 0.97     | 1.30     | 0.68     | 1.47     | 0.98       | 0.31 | 6        | 22         | 3.70E-21  |

| UniProt ID | Protein_Name                                                             | Gene Name | F1 (L/H) | F2 (L/H) | R1 (H/L) | R1 (L/H) | Mean (T/U) | S.D. | Pep. No. | %Seq. Cov. | PEP       |
|------------|--------------------------------------------------------------------------|-----------|----------|----------|----------|----------|------------|------|----------|------------|-----------|
| Q9NUJ1     | Abhydrolase domain-containing protein 10, mitochondrial                  | ABHD10    | 0.77     | 0.71     | 1.47     | 0.68     | 0.98       | 0.42 | 4        | 20         | 1.92E-126 |
| Q9UBL3-1   | ASH2-like protein                                                        | ASH2L     |          | 0.99     | 0.98     | 1.02     | 0.99       | 0.01 | 2        | 5.9        | 3.43E-66  |
| O94992     | Cardiac lineage protein 1                                                | CLP1      | 1.00     | 0.97     |          |          | 0.99       | 0.02 | 2        | 8.6        | 8.94E-30  |
| P30043     | Biliverdin reductase B                                                   | BLVRB     | 0.97     | 1.00     |          |          | 0.99       | 0.02 | 2        | 12         | 8.90E-33  |
| Q8N490-2   | Myofibrillogenesis regulator 1                                           | FKSG19    | 1.00     | 0.97     |          |          | 0.99       | 0.02 | 3        | 30         | 5.87E-09  |
| P68133     | Actin, alpha skeletal muscle                                             | ACTA      | 1.00     | 0.97     |          |          | 0.99       | 0.02 | 19       | 41         | 9.84E-267 |
| C9J9R3     | Cyclophilin J                                                            | PPIL3     |          | 0.95     | 1.02     | 0.98     | 0.99       | 0.05 | 2        | 21         | 2.59E-03  |
| A6NMN0     | Putative uncharacterized protein PHKA1                                   | PHKA1     |          | 0.81     | 1.16     | 0.86     | 0.99       | 0.25 | 2        | 1.9        | 1.24E-19  |
| Q9UMR2-1   | ATP-dependent RNA helicase DDX19B                                        | DBP5      | 0.74     |          | 1.23     | 0.81     | 0.99       | 0.35 | 6        | 13         | 7.99E-50  |
| Q9Y4P3     | Transducin beta-like protein 2                                           | TBL2      |          | 1.06     | 0.91     | 1.10     | 0.99       | 0.11 | 2        | 5.6        | 1.69E-78  |
| P22694-1   | cAMP-dependent protein kinase catalytic subunit beta                     | PRKACB    | 0.89     | 1.08     |          |          | 0.99       | 0.13 | 9        | 27         | 2.51E-41  |
| P01111     | GTPase NRas                                                              | HRAS1     | 0.85     |          | 1.12     | 0.89     | 0.99       | 0.19 | 6        | 44         | 1.82E-31  |
| Q8IWA0     | WD repeat-containing protein 75                                          | WDR75     | 1.34     |          | 0.63     | 1.59     | 0.99       | 0.50 | 3        | 5.4        | 1.07E-35  |
| P18669     | BPG-dependent PGAM 1                                                     | CDABP0006 | 0.99     | 0.96     | 1.01     | 0.99     | 0.99       | 0.03 | 20       | 81         | 0.00E+00  |
| Q14168-3   | Discs large homolog 2                                                    | DLG2      | 0.97     | 1.02     | 0.97     | 1.03     | 0.99       | 0.03 | 2        | 3.7        | 3.36E-04  |
| P49327     | [Acyl-carrier-protein] S-acetyltransferase                               | FAS       | 0.97     | 1.02     | 0.97     | 1.03     | 0.99       | 0.03 | 49       | 29         | 0.00E+00  |
| Q15369     | Elongin 15 kDa subunit                                                   | TCEB1     | 1.01     | 1.00     | 0.95     | 1.05     | 0.99       | 0.03 | 5        | 41         | 4.00E-59  |
| Q7KZF4     | 100 kDa coactivator                                                      | SND1      | 0.97     | 1.03     | 0.96     | 1.04     | 0.99       | 0.04 | 42       | 52         | 0.00E+00  |
| O96000     | Complex I-PDSW                                                           | NDUFB10   | 1.01     | 1.01     | 0.94     | 1.06     | 0.99       | 0.04 | 4        | 29         | 1.50E-35  |
| P49711     | 11-zinc finger protein                                                   | CTCF      | 0.94     | 1.04     | 0.98     | 1.02     | 0.99       | 0.05 | 8        | 12         | 1.05E-33  |
| B4DRY3     | cDNA FLJ52228, highly similar to Mps one binder kinase activator-like 1A | C2orf6    | 0.92     | 1.00     | 1.04     | 0.96     | 0.99       | 0.06 | 5        | 25         | 7.90E-48  |
| Q5TDH0-1   | Protein DDI1 homolog 2                                                   | DDI2      | 0.95     | 0.95     | 1.06     | 0.94     | 0.99       | 0.06 | 11       | 47         | 3.23E-126 |
| Q15084-2   | Protein disulfide isomerase P5                                           | PDIA6     | 1.03     | 1.02     | 0.91     | 1.10     | 0.99       | 0.07 | 15       | 43         | 0.00E+00  |
| O00231     | 26S proteasome non-ATPase regulatory subunit 11                          | PSMD11    | 1.00     | 1.05     | 0.91     | 1.10     | 0.99       | 0.07 | 18       | 46         | 1.67E-177 |
| Q96F86     | Enhancer of mRNA-decapping protein 3                                     | EDC3      | 1.05     | 1.01     | 0.90     | 1.11     | 0.99       | 0.08 | 5        | 15         | 2.19E-54  |

| UniProt ID | Protein_Name                                                                  | Gene Name      | F1 (L/H) | F2 (L/H) | R1 (H/L) | R1 (L/H) | Mean (T/U) | S.D. | Pep. No. | %Seq. Cov. | PEP       |
|------------|-------------------------------------------------------------------------------|----------------|----------|----------|----------|----------|------------|------|----------|------------|-----------|
| Q9NR31     | COPII-associated small GTPase                                                 | SAR1           | 0.96     | 0.92     | 1.08     | 0.93     | 0.99       | 0.08 | 11       | 74         | 8.17E-158 |
| P52566     | Rho GDP-dissociation inhibitor 2                                              | ARHG DIB       | 0.97     | 0.91     | 1.08     | 0.93     | 0.99       | 0.09 | 17       | 67         | 0.00E+00  |
| Q8IY67-2   | Protein raver-1                                                               | KIAA1978       | 1.03     | 1.05     | 0.88     | 1.14     | 0.99       | 0.09 | 14       | 37         | 5.45E-168 |
| O94874     | E3 UFM1-protein ligase 1                                                      | KIAA0776       | 0.92     | 0.93     | 1.11     | 0.90     | 0.99       | 0.11 | 9        | 13         | 4.78E-111 |
| Q15233     | 54 kDa nuclear RNA- and DNA-binding protein                                   | NONO           | 0.94     | 0.91     | 1.11     | 0.90     | 0.99       | 0.11 | 34       | 62         | 3.83E-271 |
| Q08752     | 40 kDa peptidyl-prolyl cis-trans isomerase                                    | CYP40          | 1.04     | 1.06     | 0.86     | 1.16     | 0.99       | 0.11 | 13       | 35         | 2.90E-86  |
| Q9H4A6     | Coat protein GPP34                                                            | GOLPH3         | 0.93     | 0.91     | 1.12     | 0.89     | 0.99       | 0.12 | 6        | 34         | 1.88E-140 |
| Q15126     | Phosphomevalonate kinase                                                      | PMKI           | 0.95     | 0.89     | 1.12     | 0.89     | 0.99       | 0.12 | 10       | 58         | 6.35E-162 |
| Q5JRC6     | PHD finger protein 6                                                          | AC004383.6-002 | 0.85     | 1.02     | 1.09     | 0.92     | 0.99       | 0.12 | 8        | 26         | 7.55E-117 |
| P62820-1   | Ras-related protein Rab-1A                                                    | RAB1           | 0.94     | 1.13     | 0.89     | 1.12     | 0.99       | 0.13 | 11       | 55         | 6.81E-230 |
| O75569-1   | Interferon-inducible double stranded RNA-dependent protein kinase activator A | HSD14          | 0.87     | 0.96     | 1.13     | 0.88     | 0.99       | 0.13 | 7        | 32         | 9.94E-32  |
| Q6IBS0     | A6-related protein                                                            | MSTP011        | 1.08     | 1.05     | 0.83     | 1.20     | 0.99       | 0.14 | 11       | 50         | 1.96E-127 |
| Q07666-1   | GAP-associated tyrosine phosphoprotein p62                                    | KHDRBS1        | 0.90     | 0.91     | 1.15     | 0.87     | 0.99       | 0.14 | 12       | 32         | 5.33E-178 |
| P11413-2   | Glucose-6-phosphate 1-dehydrogenase                                           | G6PD           | 0.93     | 0.87     | 1.16     | 0.86     | 0.99       | 0.15 | 20       | 39         | 1.57E-228 |
| P00558     | Cell migration-inducing gene 10 protein                                       | MIG10          | 0.89     | 0.90     | 1.17     | 0.85     | 0.99       | 0.16 | 32       | 75         | 0.00E+00  |
| Q7Z478     | ATP-dependent RNA helicase DHX29                                              | DDX29          | 0.89     | 1.19     | 0.88     | 1.14     | 0.99       | 0.18 | 6        | 5.4        | 7.12E-63  |
| Q02750     | Dual specificity mitogen-activated protein kinase kinase 1                    | MAP2K1         | 0.78     | 1.08     | 1.10     | 0.91     | 0.99       | 0.18 | 9        | 25         | 6.56E-32  |
| Q8TAQ2-1   | BRG1-associated factor 170                                                    | BAF170         | 0.83     | 0.94     | 1.19     | 0.84     | 0.99       | 0.18 | 27       | 26         | 4.46E-184 |
| A8MYX5     | 60S ribosomal protein L30                                                     | RPL30          | 1.11     | 1.09     | 0.76     | 1.32     | 0.99       | 0.20 | 7        | 72         | 5.23E-128 |
| Q15907     | GTP-binding protein YPT3                                                      | RAB11B         | 0.84     | 0.90     | 1.22     | 0.82     | 0.99       | 0.20 | 11       | 56         | 3.68E-192 |
| Q6P4H0     | Glutathione S-transferase kappa 1                                             | GSTK1          | 1.18     | 1.02     | 0.76     | 1.32     | 0.99       | 0.21 | 5        | 23         | 1.04E-78  |
| Q6P1N0-1   | Coiled-coil and C2 domain-containing protein 1A                               | CC2D1A         | 1.08     | 1.15     | 0.73     | 1.37     | 0.99       | 0.23 | 9        | 12         | 4.01E-38  |
| P36543     | Vacuolar proton pump subunit E 1                                              | ATP6E          | 0.85     | 0.86     | 1.25     | 0.80     | 0.99       | 0.23 | 5        | 24         | 9.84E-29  |

| UniProt ID | Protein_Name                                                                                                 | Gene Name        | F1 (L/H) | F2 (L/H) | R1 (H/L) | R1 (L/H) | Mean (T/U) | S.D. | Pep. No. | %Seq. Cov. | PEP       |
|------------|--------------------------------------------------------------------------------------------------------------|------------------|----------|----------|----------|----------|------------|------|----------|------------|-----------|
| Q9HA64     | Fructosamine-3-kinase-related protein                                                                        | FN3KRP           | 0.84     | 0.87     | 1.25     | 0.80     | 0.99       | 0.23 | 5        | 18         | 3.42E-21  |
| Q96CT7     | Coiled-coil domain-containing protein 124                                                                    | CCDC124          | 1.07     | 1.18     | 0.71     | 1.41     | 0.99       | 0.25 | 7        | 37         | 2.53E-52  |
| C9JEH3     | Angio-associated, migratory cell protein, isoform CRA_a                                                      | AAMP             | 1.07     | 1.23     | 0.66     | 1.52     | 0.99       | 0.29 | 3        | 8.5        | 1.51E-21  |
| Q7Z4V5-1   | Hepatoma-derived growth factor 2                                                                             | HDGF2            | 0.66     | 0.78     | 1.52     | 0.66     | 0.99       | 0.47 | 15       | 24         | 6.65E-38  |
| Q96BX8     | Mob1 homolog 2A                                                                                              | MOB3A            | 0.55     | 0.60     | 1.81     | 0.55     | 0.99       | 0.71 | 4        | 31         | 9.33E-24  |
| P61353     | 60S ribosomal protein L27                                                                                    | RPL27            | 1.07     | 1.04     | 0.85     | 1.18     | 0.99       | 0.12 | 5        | 45         | 1.82E-19  |
| P48739-2   | Phosphatidylinositol transfer protein beta isoform                                                           | PITPNB           | 0.99     | 0.99     | 0.99     | 1.01     | 0.99       | 0.00 | 8        | 34         | 1.63E-37  |
| P30154-2   | PP2A subunit A isoform PR65-beta                                                                             | PPP2R1B          | 0.98     | 0.99     | 1        | 1.00     | 0.99       | 0.01 | 19       | 36         | 3.86E-214 |
| Q9NR45     | N-acetylneuraminase synthase                                                                                 | NANS             | 1.00     | 0.99     | 0.98     | 1.02     | 0.99       | 0.01 | 9        | 37         | 1.34E-86  |
| Q92973-1   | Importin beta-2                                                                                              | KPNB2            | 0.99     | 1.01     | 0.97     | 1.03     | 0.99       | 0.02 | 22       | 34         | 1.30E-257 |
| P52209     | 6-phosphogluconate dehydrogenase, decarboxylating                                                            | PGD              | 1.00     | 0.96     | 1.01     | 0.99     | 0.99       | 0.03 | 19       | 50         | 0.00E+00  |
| O14929     | Histone acetyltransferase type B catalytic subunit                                                           | HAT1             | 1.01     | 0.96     | 1.00     | 1.00     | 0.99       | 0.03 | 9        | 31         | 4.19E-120 |
| Q13613-1   | Myotubularin-related protein 1                                                                               | MTMR1            | 0.99     | 1.02     | 0.96     | 1.04     | 0.99       | 0.03 | 3        | 5.3        | 7.98E-12  |
| B3KTZ7     | cDNA FLJ39003 fis, clone NT2RI2024313, highly similar to Probable fibrosin-1 long transcript protein         | FBRS             | 1.01     | 1.01     | 0.95     | 1.05     | 0.99       | 0.03 | 2        | 2.7        | 3.69E-04  |
| P19388     | DNA-directed RNA polymerase II 23 kDa polypeptide                                                            | POLR2E           | 0.98     | 0.96     | 1.03     | 0.97     | 0.99       | 0.04 | 5        | 28         | 1.29E-42  |
| Q53HE2     | Triosephosphate isomerase                                                                                    | TPI              | 0.96     | 0.95     | 1.06     | 0.94     | 0.99       | 0.06 | 22       | 77         | 0.00E+00  |
| A8K7X6     | cDNA FLJ77432, highly similar to Homo sapiens poly(rC) binding protein 2 (PCBP2), transcript variant 2, mRNA | hCG_2017557      | 0.96     | 1.06     | 0.95     | 1.05     | 0.99       | 0.06 | 18       | 69         | 0.00E+00  |
| Q9UMX0-1   | Protein linking IAP with cytoskeleton 1                                                                      | DA41             | 0.90     | 1.15     | 0.92     | 1.09     | 0.99       | 0.14 | 4        | 11         | 8.29E-63  |
| Q6UXN9     | WD repeat-containing protein 82                                                                              | UNQ9342/PRO34047 | 0.93     | 0.89     | 1.15     | 0.87     | 0.99       | 0.14 | 7        | 25         | 1.13E-34  |
| P54920     | Alpha-soluble NSF                                                                                            | NAPA             | 0.86     | 0.95     | 1.16     | 0.86     | 0.99       | 0.15 | 14       | 61         | 2.43E-176 |

| UniProt ID | Protein_Name                                                                           | Gene Name | F1 (L/H) | F2 (L/H) | R1 (H/L) | R1 (L/H) | Mean (T/U) | S.D. | Pep. No. | %Seq. Cov. | PEP       |
|------------|----------------------------------------------------------------------------------------|-----------|----------|----------|----------|----------|------------|------|----------|------------|-----------|
|            | attachment protein                                                                     |           |          |          |          |          |            |      |          |            |           |
| O95400     | CD2 antigen cytoplasmic tail-binding protein 2                                         | CD2BP2    | 1.00     | 1.14     | 0.83     | 1.20     | 0.99       | 0.16 | 3        | 11         | 3.54E-18  |
| P35658-5   | 214 kDa nucleoporin                                                                    | CAIN      | 1.01     | 1.17     | 0.79     | 1.27     | 0.99       | 0.19 | 11       | 10         | 4.73E-145 |
| P16220-1   | Cyclic AMP-responsive element-binding protein 1                                        | CREB1     | 0.84     | 0.89     | 1.24     | 0.81     | 0.99       | 0.22 | 3        | 13         | 5.30E-11  |
| P29590-1   | Probable transcription factor PML                                                      | MYL       | 0.87     | 0.84     | 1.26     | 0.79     | 0.99       | 0.23 | 8        | 10         | 2.13E-24  |
| O75521-1   | Delta(3),delta(2)-enoyl-CoA isomerase                                                  | DRS1      | 1.13     | 1.14     | 0.70     | 1.43     | 0.99       | 0.25 | 7        | 22         | 1.75E-27  |
| Q9NQ29-1   | Putative RNA-binding protein Luc7-like 1                                               | LUC7L     | 1.28     | 0.89     | 0.80     | 1.25     | 0.99       | 0.26 | 10       | 29         | 2.66E-115 |
| P85037-1   | Forkhead box protein K1                                                                | FOXK1     | 1.00     |          | 0.98     | 1.02     | 0.99       | 0.01 | 4        | 11         | 7.14E-08  |
| O60563     | Cyclin-T1                                                                              | CCNT1     |          | 0.96     | 1.02     | 0.98     | 0.99       | 0.04 | 5        | 11         | 3.01E-08  |
| O43639     | Cytoplasmic protein NCK2                                                               | NCK2      | 0.94     |          | 1.04     | 0.96     | 0.99       | 0.07 | 2        | 5.5        | 1.47E-03  |
| B4DL31     | cDNA FLJ52681, highly similar to HLA class I histocompatibility antigen, alpha chain E | HLA-6.2   | 0.94     |          | 1.04     | 0.96     | 0.99       | 0.07 | 3        | 9.8        | 1.11E-12  |
| Q9Y6E0-2   | Mammalian STE20-like protein kinase 3                                                  | MST3      | 1.04     |          | 0.94     | 1.06     | 0.99       | 0.07 | 6        | 18         | 5.01E-73  |
| O95785-1   | Widely-interspaced zinc finger-containing protein                                      | WIZ       | 1.05     |          | 0.93     | 1.08     | 0.99       | 0.08 | 3        | 2.2        | 1.76E-09  |
| Q06546     | GA-binding protein alpha chain                                                         | E4TF1A    |          | 0.87     | 1.11     | 0.90     | 0.99       | 0.17 | 6        | 14         | 7.83E-30  |
| Q13596-2   | Sorting nexin-1                                                                        | SNX1      |          | 0.87     | 1.11     | 0.90     | 0.99       | 0.17 | 11       | 33         | 4.52E-123 |
| Q96AB6     | Protein NH2-terminal asparagine amidohydrolase                                         | NTAN1     |          | 0.81     | 1.17     | 0.85     | 0.99       | 0.25 | 2        | 5.5        | 7.00E-04  |
| Q9NVZ3-1   | Adaptin ear-binding coat-associated protein 2                                          | NECAP2    |          | 0.80     | 1.18     | 0.85     | 0.99       | 0.27 | 4        | 19         | 2.42E-122 |
| P61803     | Defender against cell death 1                                                          | DAD1      |          |          | 0.99     | 1.01     | 0.99       |      | 2        | 20         | 3.18E-18  |
| Q96EE3-1   | Nucleoporin SEH1                                                                       | SEC13L    |          |          | 0.99     | 1.01     | 0.99       |      | 2        | 5.2        | 7.67E-05  |
| Q8WUM4     | ALG-2-interacting protein 1                                                            | AIP1      |          |          | 0.99     | 1.01     | 0.99       |      | 34       | 47         | 0.00E+00  |
| Q9Y2Y0-1   | ADP-ribosylation factor-like protein 2-binding protein                                 | ARL2BP    |          | 0.99     |          |          | 0.99       |      | 2        | 8          | 1.44E-09  |
| P82664     | 28S ribosomal protein S10, mitochondrial                                               | MRPS10    | 0.99     |          |          |          | 0.99       |      | 2        | 14         | 1.87E-10  |
| A6NDY9     | Putative uncharacterized                                                               | FLNA      | 0.99     |          |          |          | 0.99       |      | 96       | 56         | 0.00E+00  |

| UniProt ID | Protein_Name                                        | Gene Name | F1 (L/H) | F2 (L/H) | R1 (H/L) | R1 (L/H) | Mean (T/U) | S.D. | Pep. No. | %Seq. Cov. | PEP       |
|------------|-----------------------------------------------------|-----------|----------|----------|----------|----------|------------|------|----------|------------|-----------|
|            | protein FLNA                                        |           |          |          |          |          |            |      |          |            |           |
| Q9Y3I0     | UPF0027 protein C22orf28                            | C22orf28  | 0.96     | 0.93     | 1.08     | 0.93     | 0.99       | 0.08 | 22       | 54         | 3.78E-196 |
| C9JBL2     | Putative uncharacterized protein RPL32              | RPL32     | 1.01     | 1.07     | 0.89     | 1.12     | 0.99       | 0.09 | 7        | 41         | 6.23E-83  |
| P35613-1   | 5F7                                                 | BSG       | 0.87     | 1.06     | 1.04     | 0.96     | 0.99       | 0.10 | 5        | 19         | 1.72E-31  |
| P48637     | Glutathione synthase                                | GSS       | 0.98     | 0.87     | 1.12     | 0.89     | 0.99       | 0.13 | 7        | 14         | 2.36E-35  |
| O75223-1   | Cytochrome c-releasing factor 21                    | C7orf24   | 1.12     | 1.03     | 0.82     | 1.22     | 0.99       | 0.15 | 6        | 34         | 1.19E-80  |
| P43487     | Ran-binding protein 1                               | RANBP1    | 1.00     | 1.16     | 0.81     | 1.23     | 0.99       | 0.18 | 10       | 69         | 3.19E-171 |
| Q8N806     | N-recognin-7                                        | C14orf130 | 1.19     | 0.97     | 0.81     | 1.23     | 0.99       | 0.19 | 3        | 8          | 3.85E-46  |
| O95372     | Acyl-protein thioesterase 2                         | APT2      | 0.79     | 0.87     | 1.31     | 0.76     | 0.99       | 0.28 | 7        | 40         | 2.77E-73  |
| Q8WXF1-1   | Paraspeckle component 1                             | PSP1      | 0.87     | 0.77     | 1.33     | 0.75     | 0.99       | 0.30 | 17       | 30         | 3.91E-139 |
| Q9NX40-1   | OCIA domain-containing protein 1                    | OCIA      | 1.36     | 1.17     | 0.44     | 2.27     | 0.99       | 0.49 | 6        | 36         | 2.73E-20  |
| P09104     | 2-phospho-D-glycerate hydro-lyase                   | ENO2      | 0.69     | 0.66     | 1.62     | 0.62     | 0.99       | 0.55 | 16       | 53         | 0.00E+00  |
| Q9Y4Y9     | U6 snRNA-associated Sm-like protein LSM5            | LSM5      | 0.99     | 1.02     | 0.97     | 1.03     | 0.99       | 0.03 | 3        | 30         | 4.89E-15  |
| Q9H089     | Large subunit GTPase 1 homolog                      | LSG1      | 1.13     | 1.05     | 0.80     | 1.25     | 0.99       | 0.17 | 2        | 4.6        | 4.70E-06  |
| P31947-1   | 14-3-3 protein sigma                                | HME1      | 0.84     | 0.94     | 1.20     | 0.83     | 0.99       | 0.19 | 7        | 20         | 4.16E-39  |
| P21912     | Iron-sulfur subunit of complex II                   | SDH       | 0.82     | 0.94     | 1.22     | 0.82     | 0.99       | 0.21 | 7        | 28         | 8.21E-36  |
| Q96IJ6-2   | GDP-mannose pyrophosphorylase A                     | GMPPA     | 1.39     | 1.00     | 0.59     | 1.69     | 0.99       | 0.40 | 4        | 11         | 1.03E-55  |
| Q9Y3D6     | FIS1 homolog                                        | CGI-135   | 0.97     | 1.02     | 0.99     | 1.01     | 0.99       | 0.03 | 3        | 24         | 4.10E-21  |
| P0CAP2-1   | Glutamate receptor-like protein 1A                  | GRINL1A   | 1.01     | 1.01     | 0.96     | 1.04     | 0.99       | 0.03 | 6        | 30         | 4.57E-20  |
| Q9Y265-1   | 49 kDa TATA box-binding protein-interacting protein | INO80H    | 1.01     | 1.01     | 0.96     | 1.04     | 0.99       | 0.03 | 13       | 37         | 2.36E-134 |
| Q07020     | 60S ribosomal protein L18                           | RPL18     | 1.03     | 1.01     | 0.94     | 1.06     | 0.99       | 0.05 | 10       | 46         | 0.00E+00  |
| P28066     | Macropain zeta chain                                | PSMA5     | 1.01     | 1.03     | 0.94     | 1.06     | 0.99       | 0.05 | 11       | 52         | 0.00E+00  |
| P35250-1   | Activator 1 40 kDa subunit                          | RFC2      | 1.04     | 1.00     | 0.94     | 1.06     | 0.99       | 0.05 | 14       | 50         | 2.62E-232 |
| Q86XI8     | Uncharacterized protein C19orf68                    | C19orf68  | 0.95     | 0.98     | 1.05     | 0.95     | 0.99       | 0.05 | 2        | 1.8        | 2.10E-02  |
| Q8NE71-1   | ATP-binding cassette 50                             | ABC50     | 1.05     | 0.99     | 0.94     | 1.06     | 0.99       | 0.06 | 12       | 16         | 3.78E-114 |
| P55265-4   | 136 kDa double-stranded RNA-binding protein         | ADAR      | 0.99     | 1.05     | 0.94     | 1.06     | 0.99       | 0.06 | 26       | 23         | 5.89E-228 |

| UniProt ID | Protein_Name                                           | Gene Name | F1 (L/H) | F2 (L/H) | R1 (H/L) | R1 (L/H) | Mean (T/U) | S.D. | Pep. No. | %Seq. Cov. | PEP       |
|------------|--------------------------------------------------------|-----------|----------|----------|----------|----------|------------|------|----------|------------|-----------|
| P37837     | Transaldolase                                          | TAL       | 0.94     | 0.96     | 1.08     | 0.93     | 0.99       | 0.08 | 18       | 47         | 1.27E-165 |
| Q53H96     | Pyrroline-5-carboxylate reductase 3                    | PYCR1     | 1.01     | 1.07     | 0.90     | 1.11     | 0.99       | 0.09 | 4        | 18         | 1.29E-19  |
| P22234     | AIR carboxylase                                        | ADE2      | 1.04     | 1.05     | 0.89     | 1.12     | 0.99       | 0.09 | 23       | 59         | 0.00E+00  |
| P46109     | Crk-like protein                                       | CRKL      | 1.09     | 0.99     | 0.90     | 1.11     | 0.99       | 0.10 | 10       | 48         | 7.12E-57  |
| P10768     | Esterase D                                             | ESD       | 1.11     | 0.99     | 0.88     | 1.14     | 0.99       | 0.12 | 11       | 64         | 1.55E-213 |
| P49720     | Proteasome chain 13                                    | PSMB3     | 1.14     | 0.88     | 0.96     | 1.04     | 0.99       | 0.13 | 6        | 32         | 7.10E-98  |
| P19623     | Putrescine aminopropyltransferase                      | SPS1      | 1.09     | 1.05     | 0.84     | 1.19     | 0.99       | 0.13 | 14       | 52         | 3.96E-72  |
| P49247     | Phosphoriboisomerase                                   | RPI       | 1.04     | 1.10     | 0.84     | 1.19     | 0.99       | 0.14 | 10       | 41         | 8.03E-68  |
| Q86U42-1   | Nuclear poly(A)-binding protein 1                      | PAB2      | 0.83     | 1.02     | 1.13     | 0.88     | 0.99       | 0.15 | 6        | 27         | 4.24E-33  |
| Q9UQ80     | Cell cycle protein p38-2G4 homolog                     | EBP1      | 1.07     | 1.10     | 0.81     | 1.23     | 0.99       | 0.16 | 21       | 59         | 6.97E-296 |
| P48047     | ATP synthase subunit O, mitochondrial                  | ATP5O     | 0.89     | 0.91     | 1.18     | 0.85     | 0.99       | 0.16 | 11       | 63         | 0.00E+00  |
| P31040     | Flavoprotein subunit of complex II                     | SDH2      | 0.89     | 0.89     | 1.20     | 0.83     | 0.99       | 0.18 | 8        | 21         | 6.48E-110 |
| Q04323-2   | SAPK substrate protein 1                               | SAKS1     | 1.01     | 0.8      | 1.17     | 0.85     | 0.99       | 0.19 | 6        | 31         | 5.57E-11  |
| Q99836     | Myeloid differentiation primary response protein MyD88 | MYD88     | 1.22     | 0.90     | 0.86     | 1.16     | 0.99       | 0.20 | 2        | 14         | 2.74E-09  |
| Q12888-2   | Tumor suppressor p53-binding protein 1                 | TP53BP1   | 1.28     | 0.91     | 0.79     | 1.27     | 0.99       | 0.26 | 10       | 7.2        | 3.00E-86  |
| Q9UNE7-1   | Antigen NY-CO-7                                        | CHIP      | 1.09     | 1.32     | 0.57     | 1.75     | 0.99       | 0.38 | 5        | 18         | 2.24E-11  |
| P98179     | Putative RNA-binding protein 3                         | RBM3      | 1.23     | 1.21     | 0.54     | 1.85     | 0.99       | 0.39 | 6        | 49         | 3.43E-60  |
| P35579-1   | Cellular myosin heavy chain, type A                    | MYH9      | 0.72     | 0.76     | 1.50     | 0.67     | 0.99       | 0.44 | ##       | 67         | 0.00E+00  |
| P49368     | CCT-gamma                                              | CCT3      | 0.99     | 1.04     | 0.95     | 1.05     | 0.99       | 0.05 | 40       | 71         | 0.00E+00  |
| P50402     | Emerin                                                 | EDMD      | 0.97     | 1.06     | 0.95     | 1.05     | 0.99       | 0.06 | 8        | 39         | 3.17E-55  |
| Q8N7H5-1   | Pancreatic differentiation protein 2                   | PAF1      | 1.01     | 1.06     | 0.91     | 1.10     | 0.99       | 0.08 | 10       | 22         | 9.35E-42  |
| Q9UHV9     | Prefoldin subunit 2                                    | HSPC231   | 0.98     | 1.09     | 0.91     | 1.10     | 0.99       | 0.09 | 5        | 40         | 7.38E-101 |
| Q09161     | 80 kDa nuclear cap-binding protein                     | CBP80     | 1.11     | 0.90     | 0.97     | 1.03     | 0.99       | 0.11 | 11       | 19         | 6.00E-96  |
| P22087     | 34 kDa nucleolar scleroderma antigen                   | FBL       | 1.08     | 1.10     | 0.80     | 1.25     | 0.99       | 0.17 | 9        | 33         | 1.28E-32  |
| Q8NBS9     | Endoplasmic reticulum resident protein 46              | TLP46     | 1.08     | 1.11     | 0.79     | 1.27     | 0.99       | 0.18 | 11       | 30         | 1.24E-60  |
| Q86UE8-1   | PKU-alpha                                              | TLK2      | 0.74     | 1.12     | 1.12     | 0.89     | 0.99       | 0.22 | 3        | 4.7        | 1.67E-08  |
| O75312     | Zinc finger protein                                    | ZNF259    | 1.11     | 1.17     | 0.70     | 1.43     | 0.99       | 0.26 | 6        | 14         | 2.01E-79  |

| UniProt ID | Protein_Name                                                             | Gene Name | F1 (L/H) | F2 (L/H) | R1 (H/L) | R1 (L/H) | Mean (T/U) | S.D. | Pep. No. | %Seq. Cov. | PEP       |
|------------|--------------------------------------------------------------------------|-----------|----------|----------|----------|----------|------------|------|----------|------------|-----------|
|            | 259                                                                      |           |          |          |          |          |            |      |          |            |           |
| P18206-1   | Metavinculin                                                             | VCL       | 0.68     | 0.68     | 1.62     | 0.62     | 0.99       | 0.54 | 10       | 10         | 1.68E-62  |
| Q9H773     | dCTP pyrophosphatase 1                                                   | CDA03     | 0.99     |          | 1.00     | 1.00     | 1.00       | 0.01 | 5        | 47         | 8.00E-38  |
| P16383-1   | GC-rich sequence DNA-binding factor                                      | C2orf3    |          | 1.00     | 0.99     | 1.01     | 1.00       | 0.01 | 4        | 5.9        | 1.09E-14  |
| Q6UW68     | Transmembrane protein 205                                                | TMEM205   | 0.94     |          | 1.05     | 0.95     | 1.00       | 0.08 | 2        | 11         | 1.53E-03  |
| Q15370     | Elongin 18 kDa subunit                                                   | TCEB2     | 0.94     |          | 1.05     | 0.95     | 1.00       | 0.08 | 11       | 92         | 4.00E-31  |
| O94804     | Lymphocyte-oriented kinase                                               | LOK       |          | 0.81     | 1.18     | 0.85     | 1.00       | 0.26 | 3        | 4.4        | 2.91E-10  |
| Q9UBD5-2   | Origin recognition complex subunit 3                                     | LATHEO    | 1.19     |          | 0.80     | 1.25     | 1.00       | 0.28 | 2        | 4.6        | 3.27E-14  |
| Q8N668     | COMM domain-containing protein 1                                         | C2orf5    |          | 0.91     | 1.08     | 0.93     | 1.00       | 0.12 | 2        | 16         | 2.83E-49  |
| Q9HCC0-1   | 3-methylcrotonyl-CoA carboxylase 2                                       | MCCB      |          | 0.91     | 1.08     | 0.93     | 1.00       | 0.12 | 2        | 3.9        | 4.80E-06  |
| Q15269     | Periodic tryptophan protein 2 homolog                                    | PWP2      | 1.31     |          | 0.68     | 1.47     | 1.00       | 0.45 | 6        | 7.8        | 2.41E-48  |
| O75367-1   | Core histone macro-H2A.1                                                 | H2AFY     | 1.01     | 1.00     | 0.98     | 1.02     | 1.00       | 0.02 | 16       | 51         | 7.93E-256 |
| P16083     | NRH dehydrogenase [quinone] 2                                            | NMOR2     | 0.99     | 1.02     | 0.98     | 1.02     | 1.00       | 0.02 | 8        | 53         | 1.75E-47  |
| Q06124-1   | Protein-tyrosine phosphatase 1D                                          | PTP2C     | 1.04     | 0.97     | 0.98     | 1.02     | 1.00       | 0.04 | 9        | 17         | 1.33E-52  |
| Q15075     | Early endosome antigen 1                                                 | EEA1      | 0.97     | 1.04     | 0.98     | 1.02     | 1.00       | 0.04 | 14       | 9.6        | 5.52E-32  |
| O15042-1   | 140 kDa Ser/Arg-rich domain protein                                      | KIAA0332  | 1.00     | 1.05     | 0.94     | 1.06     | 1.00       | 0.06 | 25       | 27         | 3.09E-190 |
| Q06265-2   | Autoantigen PM/Scl 1                                                     | EXOSC9    | 0.94     | 1.15     | 0.90     | 1.11     | 1.00       | 0.13 | 3        | 7.5        | 5.92E-07  |
| O00264     | Membrane-associated progesterone receptor component 1                    | HPR6.6    | 1.17     | 0.90     | 0.92     | 1.09     | 1.00       | 0.15 | 11       | 59         | 4.16E-147 |
| Q9Y266     | Nuclear distribution protein C homolog                                   | NUDC      | 1.05     | 1.13     | 0.81     | 1.23     | 1.00       | 0.17 | 21       | 59         | 1.76E-164 |
| Q92542-1   | Nicastrin                                                                | KIAA0253  | 0.97     | 1.21     | 0.81     | 1.23     | 1.00       | 0.20 | 4        | 8.5        | 1.83E-18  |
| P21266     | Glutathione S-transferase Mu 3                                           | GST5      | 0.79     | 0.82     | 1.38     | 0.72     | 1.00       | 0.33 | 13       | 62         | 4.20E-117 |
| Q6ZUM4-1   | CIN85-associated multi-domain-containing Rho GTPase-activating protein 1 | ARHGAP27  | 1.00     | 1.00     | 0.99     | 1.01     | 1.00       | 0.01 | 3        | 4.5        | 1.04E-05  |
| Q8N2Z9-1   | Apoptosis-inducing TAF9-like domain-containing protein 1                 | APITD1    | 1.01     | 1.01     | 0.97     | 1.03     | 1.00       | 0.02 | 2        | 15         | 4.10E-09  |
| B4E171     | cDNA FLJ59144, highly similar to Tetraspanin-7                           | A15       | 0.97     | 1.02     | 1.00     | 1.00     | 1.00       | 0.03 | 2        | 8.6        | 9.05E-227 |



| UniProt ID | Protein_Name                                                       | Gene Name       | F1 (L/H) | F2 (L/H) | R1 (H/L) | R1 (L/H) | Mean (T/U) | S.D. | Pep. No. | %Seq. Cov. | PEP       |
|------------|--------------------------------------------------------------------|-----------------|----------|----------|----------|----------|------------|------|----------|------------|-----------|
| Q53GL7     | Poly [ADP-ribose] polymerase 10                                    | PARP10          | 0.97     | 1.02     | 1.00     | 1.00     | 1.00       | 0.03 | 7        | 13         | 2.98E-41  |
| Q8N1G4     | Leucine-rich repeat-containing protein 47                          | KIAA185         | 1.01     | 0.96     | 1.02     | 0.98     | 1.00       | 0.03 | 18       | 42         | 8.02E-205 |
| B5MDU6     | Putative uncharacterized protein C2orf43                           | C2orf43         | 0.99     | 0.96     | 1.04     | 0.96     | 1.00       | 0.04 | 2        | 6.5        | 1.37E-70  |
| P61019     | Ras-related protein Rab-2A                                         | RAB2            | 1.03     | 1.01     | 0.95     | 1.05     | 1.00       | 0.04 | 10       | 60         | 1.07E-148 |
| P61758     | HIBBJ46                                                            | PFDN3           | 0.94     | 1.01     | 1.04     | 0.96     | 1.00       | 0.05 | 14       | 40         | 2.83E-288 |
| O15305     | Phosphomannomutase 2                                               | PMM2            | 0.93     | 1.03     | 1.03     | 0.97     | 1.00       | 0.06 | 4        | 17         | 6.53E-13  |
| O14556     | Glyceraldehyde-3-phosphate dehydrogenase                           | GPMD B          | 0.98     | 0.94     | 1.07     | 0.93     | 1.00       | 0.07 | 5        | 58         | 4.63E-101 |
| P40227     | Acute morphine dependence-related protein 2                        | CCT6            | 1.04     | 1.03     | 0.92     | 1.09     | 1.00       | 0.07 | 27       | 55         | 0.00E+00  |
| P63272     | DRB sensitivity-inducing factor 14 kDa subunit                     | SPT4H           | 0.93     | 0.99     | 1.07     | 0.93     | 1.00       | 0.07 | 3        | 27         | 2.23E-08  |
| Q13247-1   | Pre-mRNA-splicing factor SRP55                                     | SFRS6           | 0.94     | 1.08     | 0.97     | 1.03     | 1.00       | 0.07 | 12       | 31         | 4.61E-53  |
| Q9HBU6     | Ethanolamine kinase 1                                              | EKI1            | 1.04     | 1.04     | 0.91     | 1.10     | 1.00       | 0.08 | 2        | 12         | 2.70E-02  |
| Q9UN86-1   | GAP SH3 domain-binding protein 2                                   | G3BP2           | 1.02     | 1.06     | 0.91     | 1.10     | 1.00       | 0.08 | 11       | 32         | 8.63E-80  |
| C9J2F8     | HCG22882, isoform CRA_a                                            | hCG_22882       | 1.05     | 1.05     | 0.89     | 1.12     | 1.00       | 0.09 | 3        | 33         | 2.03E-78  |
| Q9NQC3-2   | Foocen                                                             | KIAA0886        | 1.05     | 1.05     | 0.89     | 1.12     | 1.00       | 0.09 | 6        | 26         | 1.44E-57  |
| Q53G33     | U1 small nuclear ribonucleoprotein C                               | RP3-375P9.1-002 | 0.89     | 1.07     | 1.03     | 0.97     | 1.00       | 0.09 | 2        | 17         | 8.20E-11  |
| Q9Y6E2     | Basic leucine zipper and W2 domain-containing protein 2            | BZW2            | 1.03     | 1.08     | 0.88     | 1.14     | 1.00       | 0.10 | 7        | 20         | 0.00E+00  |
| P53999     | Activated RNA polymerase II transcriptional coactivator p15        | PC4             | 0.93     | 0.94     | 1.12     | 0.89     | 1.00       | 0.11 | 9        | 47         | 1.17E-220 |
| Q01130     | Protein PR264                                                      | SFRS2           | 0.88     | 1.02     | 1.09     | 0.92     | 1.00       | 0.11 | 8        | 30         | 1.98E-84  |
| O60493-1   | Protein SDP3                                                       | SNX3            | 0.91     | 0.96     | 1.12     | 0.89     | 1.00       | 0.11 | 6        | 40         | 2.21E-19  |
| P23396     | 40S ribosomal protein S3                                           | OK/SW-cl.26     | 1.05     | 1.10     | 0.84     | 1.19     | 1.00       | 0.14 | 21       | 81         | 4.32E-157 |
| P48507     | Gamma-ECS regulatory subunit                                       | GCLM            | 1.19     | 0.89     | 0.91     | 1.10     | 1.00       | 0.17 | 5        | 27         | 1.10E-57  |
| Q6FGM0     | cDNA, FLJ96508, Homo sapiens SH3-domain GRB2-like 1 (SH3GL1), mRNA | hCG_21932       | 0.96     | 0.85     | 1.18     | 0.85     | 1.00       | 0.17 | 4        | 12         | 5.39E-34  |
| P31150     | Guanosine                                                          | GDI1            | 0.88     | 0.91     | 1.20     | 0.83     | 1.00       | 0.18 | 16       | 43         | 9.37E-286 |

| UniProt ID | Protein_Name                                       | Gene Name | F1 (L/H) | F2 (L/H) | R1 (H/L) | R1 (L/H) | Mean (T/U) | S.D. | Pep. No. | %Seq. Cov. | PEP       |
|------------|----------------------------------------------------|-----------|----------|----------|----------|----------|------------|------|----------|------------|-----------|
|            | diphosphate dissociation inhibitor 1               |           |          |          |          |          |            |      |          |            |           |
| Q8TDP1-1   | Aicardi-Goutieres syndrome 3 protein               | AYP1      | 1.07     | 1.13     | 0.79     | 1.27     | 1.00       | 0.18 | 6        | 46         | 4.75E-93  |
| Q14240-2   | ATP-dependent RNA helicase eIF4A-2                 | DDX2B     | 0.85     | 0.92     | 1.22     | 0.82     | 1.00       | 0.20 | 15       | 45         | 8.91E-230 |
| Q96HY6-1   | DDRGGK domain-containing protein 1                 | C20orf116 | 0.93     | 1.23     | 0.83     | 1.20     | 1.00       | 0.21 | 6        | 35         | 1.14E-103 |
| P16403     | Histone H1.2                                       | H1F2      | 0.84     | 0.91     | 1.24     | 0.81     | 1.00       | 0.21 | 17       | 47         | 1.35E-217 |
| A8MU M5    | Putative uncharacterized protein TOR1AIP1          | TOR1AIP1  | 0.87     | 0.84     | 1.28     | 0.78     | 1.00       | 0.25 | 11       | 26         | 1.02E-76  |
| Q8NAV1-1   | Pre-mRNA-splicing factor 38A                       | PRPF38A   | 1.07     | 1.20     | 0.72     | 1.39     | 1.00       | 0.25 | 5        | 22         | 1.73E-13  |
| P15153     | GX                                                 | RAC2      | 0.84     | 0.85     | 1.30     | 0.77     | 1.00       | 0.26 | 11       | 59         | 1.96E-51  |
| Q14683     | Structural maintenance of chromosomes protein 1A   | DXS423E   | 0.82     | 0.85     | 1.32     | 0.76     | 1.00       | 0.28 | 31       | 29         | 2.65E-245 |
| Q9H118-1   | Activating signal cointegrator 1 complex subunit 2 | ASC1P100  | 1.35     | 0.94     | 0.70     | 1.43     | 1.00       | 0.33 | 4        | 7          | 1.07E-11  |
| P41214-1   | Hepatocellular carcinoma-associated antigen 56     | HCA56     | 1.32     | 1.04     | 0.63     | 1.59     | 1.00       | 0.35 | 5        | 15         | 2.42E-82  |
| P26038     | Membrane-organizing extension spike protein        | MSN       | 0.69     | 0.75     | 1.55     | 0.65     | 1.00       | 0.48 | 49       | 68         | 0.00E+00  |
| P61009     | Microsomal signal peptidase 22/23 kDa subunit      | SPC22     | 1.00     | 1.58     | 0.41     | 2.44     | 1.00       | 0.59 | 2        | 13         | 2.14E-21  |
| P14174     | Glycosylation-inhibiting factor                    | GLIF      | 1.13     | 0.97     | 0.90     | 1.11     | 1.00       | 0.12 | 3        | 36         | 1.99E-30  |
| Q9BTW9-4   | Beta-tubulin cofactor D                            | KIAA0988  | 1.02     | 1.16     | 0.82     | 1.22     | 1.00       | 0.17 | 10       | 8.7        | 1.20E-107 |
| P51784     | Deubiquitinating enzyme 11                         | UHX1      | 1.01     | 1.17     | 0.82     | 1.22     | 1.00       | 0.18 | 4        | 5.8        | 1.50E-36  |
| Q9Y411-3   | Dilute myosin heavy chain, non-muscle              | MYH12     | 1.00     | 1.00     | 1.00     | 1.00     | 1.00       | 0.00 | 3        | 1.1        | 6.75E-03  |
| B8ZZN6     | Putative uncharacterized protein SUMO1             | SUMO1     |          | 1.00     | 1.00     | 1.00     | 1.00       | 0.00 | 3        | 16         | 8.09E-05  |
| P14625     | 94 kDa glucose-regulated protein                   | GRP94     | 1.00     | 1.01     | 0.99     | 1.01     | 1.00       | 0.01 | 55       | 62         | 0.00E+00  |
| Q9BWT6     | Meiotic nuclear division protein 1 homolog         | GAJ       | 1.01     |          | 0.99     | 1.01     | 1.00       | 0.01 | 3        | 19         | 1.59E-23  |
| B1PS43     | Myosin heavy chain 11 smooth muscle isoform        | MYH11     | 1.01     |          | 0.99     | 1.01     | 1.00       | 0.01 | 17       | 7.9        | 1.29E-260 |
| Q5T8P6-2   | CTCL tumor antigen se70-2                          | C13orf10  | 0.99     | 1.02     | 0.99     | 1.01     | 1.00       | 0.02 | 18       | 20         | 4.37E-79  |
| Q8NBT2     | Kinetochore protein Spc24                          | SPBC24    | 1.01     | 1.01     | 0.98     | 1.02     | 1.00       | 0.02 | 5        | 43         | 0.00E+00  |

| UniProt ID | Protein_Name                                                                 | Gene Name | F1 (L/H) | F2 (L/H) | R1 (H/L) | R1 (L/H) | Mean (T/U) | S.D. | Pep. No. | %Seq. Cov. | PEP       |
|------------|------------------------------------------------------------------------------|-----------|----------|----------|----------|----------|------------|------|----------|------------|-----------|
| P42025     | Actin-related protein 1B                                                     | ACTR1B    | 0.98     | 1.02     | 1.00     | 1.00     | 1.00       | 0.02 | 9        | 30         | 2.63E-41  |
| O75347     | TCP1-chaperonin cofactor A                                                   | TBCA      | 1.02     | 0.96     | 1.02     | 0.98     | 1.00       | 0.03 | 12       | 64         | 1.31E-74  |
| O14818-1   | Proteasome subunit alpha type-7                                              | HSPC      | 1.02     | 1.02     | 0.96     | 1.04     | 1.00       | 0.03 | 19       | 68         | 0.00E+00  |
| P60900     | 27 kDa prosomal protein                                                      | PROS27    | 1.04     | 0.99     | 0.97     | 1.03     | 1.00       | 0.04 | 16       | 59         | 5.18E-156 |
| Q8TE02-4   | Dermal papilla-derived protein 6                                             | C17orf81  |          | 1.03     | 0.97     | 1.03     | 1.00       | 0.04 | 2        | 8.4        | 1.70E-10  |
| P20618     | Macropain subunit C5                                                         | PSC5      | 1.02     | 0.95     | 1.03     | 0.97     | 1.00       | 0.04 | 11       | 61         | 4.91E-179 |
| P11766     | Alcohol dehydrogenase 5                                                      | ADH5      | 1.03     | 0.95     | 1.02     | 0.98     | 1.00       | 0.04 | 10       | 38         | 9.36E-51  |
| O95861-1   | 3(2),5-bisphosphate nucleotidase 1                                           | BPNT1     | 1.00     | 0.95     | 1.05     | 0.95     | 1.00       | 0.05 | 10       | 43         | 1.32E-53  |
| P28070     | 26 kDa prosomal protein                                                      | PROS26    | 1.03     | 0.94     | 1.03     | 0.97     | 1.00       | 0.05 | 8        | 50         | 5.25E-93  |
| O75832     | 26S proteasome non-ATPase regulatory subunit 10                              | PSMD10    | 1.02     | 1.04     | 0.94     | 1.06     | 1.00       | 0.05 | 6        | 39         | 1.54E-27  |
| Q96T60     | 2(3)-polynucleotidase                                                        | PNKP      | 0.96     | 1.07     | 0.97     | 1.03     | 1.00       | 0.06 | 3        | 9.2        | 4.59E-27  |
| Q8IWX8     | Calcium homeostasis endoplasmic reticulum protein                            | CHERP     | 0.98     | 1.07     | 0.95     | 1.05     | 1.00       | 0.06 | 11       | 16         | 1.91E-55  |
| Q8N3X1     | Formin-binding protein 30                                                    | FBP30     | 1.05     | 0.92     | 1.03     | 0.97     | 1.00       | 0.07 | 5        | 7          | 5.33E-57  |
| Q99720-1   | Aging-associated gene 8 protein                                              | AAG8      | 0.95     |          | 1.05     | 0.95     | 1.00       | 0.07 | 2        | 14         | 9.24E-05  |
| A8MX72     | cDNA FLJ55157, highly similar to Eukaryotic translation initiation factor 4E | EIF4E     | 0.91     | 1.03     | 1.06     | 0.94     | 1.00       | 0.08 | 6        | 27         | 3.73E-33  |
| P80303-1   | DNA-binding protein NEFA                                                     | NEFA      | 1.06     |          | 0.94     | 1.06     | 1.00       | 0.08 | 3        | 9.8        | 1.46E-20  |
| P61254     | 60S ribosomal protein L26                                                    | RPL26     | 1.01     | 1.08     | 0.91     | 1.10     | 1.00       | 0.09 | 10       | 39         | 2.61E-22  |
| Q9BT09-1   | CTG repeat protein 4a                                                        | CNPY3     | 0.93     | 1.07     |          |          | 1.00       | 0.10 | 2        | 7.2        | 1.31E-41  |
| P09651-1   | Helix-destabilizing protein                                                  | HNRNP A1  | 0.92     | 0.94     | 1.14     | 0.88     | 1.00       | 0.12 | 26       | 61         | 0.00E+00  |
| Q12906-4   | Double-stranded RNA-binding protein 76                                       | DRBF      | 0.90     | 0.96     | 1.14     | 0.88     | 1.00       | 0.12 | 28       | 42         | 4.70E-206 |
| P20340-1   | Ras-related protein Rab-6A                                                   | RAB6      | 0.92     | 0.93     | 1.15     | 0.87     | 1.00       | 0.13 | 8        | 33         | 6.34E-40  |
| Q9UNF1-1   | Breast cancer-associated gene 1 protein                                      | BCG1      | 0.94     | 0.91     | 1.15     | 0.87     | 1.00       | 0.13 | 5        | 14         | 2.62E-41  |
| Q00653-1   | DNA-binding factor KBF2                                                      | LYT10     | 0.98     | 0.88     | 1.14     | 0.88     | 1.00       | 0.13 | 4        | 6.3        | 4.19E-24  |
| Q13526     | Peptidyl-prolyl cis-trans isomerase                                          | PIN1      | 1.12     | 1.05     | 0.83     | 1.20     | 1.00       | 0.15 | 5        | 43         | 3.96E-74  |

| UniProt ID | Protein_Name                                                                                                                | Gene Name | F1 (L/H) | F2 (L/H) | R1 (H/L) | R1 (L/H) | Mean (T/U) | S.D. | Pep. No. | %Seq. Cov. | PEP       |
|------------|-----------------------------------------------------------------------------------------------------------------------------|-----------|----------|----------|----------|----------|------------|------|----------|------------|-----------|
|            | NIMA-interacting 1                                                                                                          |           |          |          |          |          |            |      |          |            |           |
| P30041     | 1-Cys peroxiredoxin                                                                                                         | AOP2      | 0.91     | 0.91     | 1.18     | 0.85     | 1.00       | 0.16 | 14       | 63         | 1.32E-94  |
| P60709     | Actin, cytoplasmic 1                                                                                                        | ACT1      | 0.91     | 0.91     | 1.18     | 0.85     | 1.00       | 0.16 | 28       | 83         | 0.00E+00  |
| Q96JM3     | Zinc finger protein 828                                                                                                     | C13orf8   | 0.93     | 0.89     | 1.18     | 0.85     | 1.00       | 0.16 | 8        | 13         | 8.46E-34  |
| Q9BQ67     | Glutamate-rich WD repeat-containing protein 1                                                                               | GRWD      | 1.07     | 1.11     | 0.82     | 1.22     | 1.00       | 0.16 | 7        | 18         | 6.69E-49  |
| Q8WXI9     | GATA zinc finger domain-containing protein 2B                                                                               | GATA D2B  | 0.88     | 0.94     | 1.18     | 0.85     | 1.00       | 0.16 | 9        | 20         | 2.67E-72  |
| P19838-2   | DNA-binding factor KBF1                                                                                                     | NFKB1     | 1.12     |          | 0.88     | 1.14     | 1.00       | 0.17 | 6        | 8.5        | 2.49E-21  |
| P09960-1   | Leukotriene A(4) hydrolase                                                                                                  | LTA4      | 1.10     | 1.10     | 0.80     | 1.25     | 1.00       | 0.17 | 11       | 25         | 8.13E-94  |
| A0AV56     | SAFB protein                                                                                                                | SAFB      | 0.87     | 0.93     | 1.20     | 0.83     | 1.00       | 0.18 | 27       | 30         | 2.52E-298 |
| Q9UL25     | Ras-related protein Rab-21                                                                                                  | KIAA0118  | 1.09     | 1.12     | 0.79     | 1.27     | 1.00       | 0.18 | 7        | 32         | 1.95E-84  |
| A8K702     | cDNA FLJ78285, highly similar to Homo sapiens gasdermin domain containing 1, mRNA                                           | DFNA5L    |          | 1.13     | 0.87     | 1.15     | 1.00       | 0.18 | 4        | 9.6        | 9.48E-46  |
| Q9P2M7-1   | Cingulin                                                                                                                    | CGN       | 0.87     | 1.13     |          |          | 1.00       | 0.18 | 3        | 2.7        | 3.34E-07  |
| Q15428     | Spliceosome-associated protein 62                                                                                           | SAP62     | 0.93     | 0.86     | 1.21     | 0.83     | 1.00       | 0.19 | 11       | 24         | 4.61E-73  |
| P49756-1   | Arg/Glu/Asp-rich protein of 120 kDa                                                                                         | RBM25     | 1.06     | 1.15     | 0.79     | 1.27     | 1.00       | 0.19 | 22       | 28         | 1.57E-144 |
| Q8N6N3-1   | BCL10-associated gene protein                                                                                               | BAG       | 1.02     | 1.24     | 0.74     | 1.35     | 1.00       | 0.25 | 4        | 19         | 2.95E-07  |
| P00390-1   | Glutathione reductase, mitochondrial                                                                                        | GLUR      | 0.85     | 0.86     | 1.29     | 0.78     | 1.00       | 0.25 | 11       | 35         | 4.50E-65  |
| Q07960     | CDC42 GTPase-activating protein                                                                                             | ARHGAP1   |          | 0.80     | 1.20     | 0.83     | 1.00       | 0.28 | 6        | 17         | 7.56E-74  |
| P09874     | NAD(+) ADP-ribosyltransferase 1                                                                                             | ADPRT     | 0.80     | 0.84     | 1.36     | 0.74     | 1.00       | 0.31 | 48       | 45         | 0.00E+00  |
| P13861     | cAMP-dependent protein kinase type II-alpha regulatory subunit                                                              | PKR2      | 1.37     | 0.86     | 0.77     | 1.30     | 1.00       | 0.32 | 2        | 5.7        | 2.29E-19  |
| A8K8N7     | cDNA FLJ77779, highly similar to Homo sapiens phosphoribosylformylglycinamide synthase (FGAR amidotransferase) (PFAS), mRNA | hCG_31283 | 1.23     |          | 0.77     | 1.30     | 1.00       | 0.33 | 18       | 20         | 4.20E-170 |
| Q9NR50-1   | eIF-2B GDP-GTP exchange factor subunit gamma                                                                                | EIF2B3    | 1.38     | 0.91     | 0.71     | 1.41     | 1.00       | 0.34 | 5        | 14         | 6.99E-25  |

| UniProt ID | Protein_Name                                                                                  | Gene Name    | F1 (L/H) | F2 (L/H) | R1 (H/L) | R1 (L/H) | Mean (T/U) | S.D. | Pep. No. | %Seq. Cov. | PEP       |
|------------|-----------------------------------------------------------------------------------------------|--------------|----------|----------|----------|----------|------------|------|----------|------------|-----------|
| B3KP52     | cDNA FLJ31171 fis, clone KIDNE2000046, highly similar to 3-mercaptopyruvate sulfurtransferase | MPST         | 0.82     | 0.78     | 1.40     | 0.71     | 1.00       | 0.35 | 7        | 31         | 4.15E-128 |
| P08758     | Anchorin CII                                                                                  | ANX5         | 0.78     | 0.75     | 1.47     | 0.68     | 1.00       | 0.41 | 15       | 46         | 4.77E-153 |
| O75190-1   | DnaJ homolog subfamily B member 6                                                             | DNAJB6       |          | 0.71     | 1.29     | 0.78     | 1.00       | 0.41 | 3        | 13         | 1.41E-20  |
| Q69YH5-1   | Cell division cycle-associated protein 2                                                      | CDCA2        | 1.34     |          | 0.66     | 1.52     | 1.00       | 0.48 | 5        | 10         | 1.74E-50  |
| P55957-2   | BH3-interacting domain death agonist                                                          | BID          | 0.67     | 0.74     | 1.59     | 0.63     | 1.00       | 0.51 | 9        | 55         | 1.17E-279 |
| O14602     | Eukaryotic translation initiation factor 1A, Y-chromosomal                                    | EIF1AY       |          | 1.39     | 0.61     | 1.64     | 1.00       | 0.55 | 3        | 24         | 2.27E-05  |
| Q8IV50-1   | LysM and putative peptidoglycan-binding domain-containing protein 2                           | LYSM D2      |          | 0.60     | 1.40     | 0.71     | 1.00       | 0.57 | 2        | 8.8        | 1.04E-13  |
| Q96RE7     | BTB/POZ domain-containing protein 14B                                                         | BTBD14B      |          |          | 1.00     | 1.00     | 1.00       |      | 2        | 4.4        | 9.42E-10  |
| Q9BWT1-2   | Cell division cycle-associated protein 7                                                      | CDCA7        |          |          | 1.00     | 1.00     | 1.00       |      | 2        | 4.2        | 1.17E-04  |
| Q53GQ0     | 17-beta-hydroxysteroid dehydrogenase 12                                                       | HSD17B12     | 1.00     |          |          |          | 1.00       |      | 2        | 9.6        | 5.70E-05  |
| Q9H7C9-1   | UPF0366 protein C11orf67                                                                      | C11orf67     | 1.00     |          |          |          | 1.00       |      | 2        | 22         | 4.43E-28  |
| Q6P1N9-1   | Hepatocarcinoma high expression protein                                                       | CDA11        |          | 1.00     |          |          | 1.00       |      | 2        | 6.6        | 5.59E-11  |
| Q9NVH1-1   | DnaJ homolog subfamily C member 11                                                            | DNAJC11      | 1.00     |          |          |          | 1.00       |      | 3        | 7.3        | 2.54E-05  |
| Q96NT0     | Coiled-coil domain-containing protein 115                                                     | CCDC115      | 1.00     |          |          |          | 1.00       |      | 4        | 35         | 4.31E-21  |
| Q99880     | Histone H2B type 1-L                                                                          | H2BFC        |          | 1.00     |          |          | 1.00       |      | 13       | 73         | 7.23E-97  |
| P07437     | Tubulin beta chain                                                                            | OK/SW-cl.56  |          | 1.00     |          |          | 1.00       |      | 14       | 31         | 2.11E-276 |
| Q9H0S4     | DEAD box protein 47                                                                           | DDX47        | 1.03     | 1.12     | 0.85     | 1.18     | 1.00       | 0.14 | 7        | 23         | 2.03E-88  |
| O94903     | Proline synthase co-transcribed bacterial homolog protein                                     | PROSC        | 0.99     | 1.01     | 1.01     | 0.99     | 1.00       | 0.01 | 9        | 35         | 2.65E-45  |
| P02795     | Metallothionein-2                                                                             | CES1         | 1.01     | 1.01     | 0.99     | 1.01     | 1.00       | 0.01 | 3        | 49         | 3.53E-18  |
| Q69YJ7     | Putative uncharacterized protein DKFZp667H197                                                 | DKFZp667H197 | 1.00     | 0.99     | 1.02     | 0.98     | 1.00       | 0.02 | 9        | 11         | 9.32E-60  |
| A8MXP9     | Putative uncharacterized protein MATR3                                                        | MATR3        | 1.00     | 0.99     | 1.02     | 0.98     | 1.00       | 0.02 | 39       | 45         | 0.00E+00  |
| P21796     | Outer mitochondrial membrane protein                                                          | VDAC         | 1.00     | 1.02     | 0.99     | 1.01     | 1.00       | 0.02 | 15       | 62         | 5.07E-135 |

| UniProt ID | Protein_Name                                                                | Gene Name   | F1 (L/H) | F2 (L/H) | R1 (H/L) | R1 (L/H) | Mean (T/U) | S.D. | Pep. No. | %Seq. Cov. | PEP       |
|------------|-----------------------------------------------------------------------------|-------------|----------|----------|----------|----------|------------|------|----------|------------|-----------|
|            | porin 1                                                                     |             |          |          |          |          |            |      |          |            |           |
| P31948     | Hsc70/Hsp90-organizing protein                                              | STIP1       | 0.99     | 0.99     | 1.03     | 0.97     | 1.00       | 0.02 | 46       | 65         | 0.00E+00  |
| Q8N0V3-1   | Putative ribosome-binding factor A, mitochondrial                           | C18orf22    | 0.97     | 1.02     | 1.02     | 0.98     | 1.00       | 0.03 | 2        | 7.6        | 6.61E-04  |
| Q01081     | Splicing factor U2AF 35 kDa subunit                                         | U2AF1       | 0.98     | 1.04     | 0.99     | 1.01     | 1.00       | 0.03 | 7        | 33         | 4.02E-64  |
| Q99615     | DnaJ homolog subfamily C member 7                                           | DNAJC7      | 1.01     | 1.04     | 0.96     | 1.04     | 1.00       | 0.04 | 18       | 33         | 2.40E-95  |
| A1L0V1     | ACTN1 protein                                                               | ACTN1       | 0.95     | 1.01     | 1.05     | 0.95     | 1.00       | 0.05 | 46       | 49         | 0.00E+00  |
| P55060-1   | Cellular apoptosis susceptibility protein                                   | CAS         | 1.02     | 1.11     | 0.88     | 1.14     | 1.00       | 0.12 | 32       | 39         | 0.00E+00  |
| P61224     | GTP-binding protein smg p21B                                                | OK/SW-cl.11 | 0.96     | 0.91     | 1.14     | 0.88     | 1.00       | 0.12 | 9        | 64         | 3.35E-94  |
| Q86YV0-1   | RAS protein activator like-3                                                | RASAL3      | 0.96     | 0.90     | 1.15     | 0.87     | 1.00       | 0.13 | 17       | 25         | 1.74E-127 |
| P16930     | Beta-diketonase                                                             | FAH         | 0.99     | 1.14     | 0.88     | 1.14     | 1.00       | 0.13 | 3        | 7.2        | 2.20E-60  |
| Q92879-4   | 50 kDa nuclear polyadenylated RNA-binding protein                           | BRUNOL2     | 0.93     | 0.91     | 1.17     | 0.85     | 1.00       | 0.14 | 4        | 8.2        | 3.66E-39  |
| P36542-1   | ATP synthase subunit gamma, mitochondrial                                   | ATP5C       | 0.89     | 0.92     | 1.20     | 0.83     | 1.00       | 0.17 | 10       | 42         | 2.10E-70  |
| O75874     | Cytosolic NADP-isocitrate dehydrogenase                                     | IDH1        | 0.90     | 0.89     | 1.22     | 0.82     | 1.00       | 0.19 | 8        | 22         | 5.95E-105 |
| A8K4L9     | cDNA FLJ75459                                                               | TIAL1       | 1.07     | 1.15     | 0.79     | 1.27     | 1.00       | 0.19 | 7        | 20         | 1.25E-63  |
| Q9Y263     | Phospholipase A-2-activating protein                                        | PLAA        | 1.22     | 0.85     | 0.94     | 1.06     | 1.00       | 0.19 | 6        | 11         | 1.58E-48  |
| Q99598     | Translin-associated factor X                                                | TRAX        | 1.00     | 0.81     | 1.20     | 0.83     | 1.00       | 0.20 | 10       | 51         | 3.11E-93  |
| Q9UKG1     | Adapter protein containing PH domain, PTB domain and leucine zipper motif 1 | APPL        | 0.97     | 0.82     | 1.22     | 0.82     | 1.00       | 0.20 | 5        | 8.3        | 4.15E-32  |
| P28062-1   | Low molecular mass protein 7                                                | LMP7        | 0.99     | 0.80     | 1.22     | 0.82     | 1.00       | 0.21 | 7        | 30         | 8.25E-36  |
| C9JUI0     | Putative uncharacterized protein IVD                                        | IVD         | 0.80     | 0.96     | 1.25     | 0.80     | 1.00       | 0.23 | 5        | 11         | 1.02E-16  |
| Q9Y6V0-1   | Aczonin                                                                     | ACZ         | 0.80     | 0.93     | 1.28     | 0.78     | 1.00       | 0.25 | 2        | 0.5        | 1.15E-02  |
| O95433     | Activator of 90 kDa heat shock protein ATPase homolog 1                     | AHSA1       | 1.18     | 1.13     | 0.70     | 1.43     | 1.00       | 0.26 | 17       | 55         | 4.69E-103 |
| P50148     | Guanine nucleotide-binding protein alpha-q                                  | GAQ         | 0.82     | 0.81     | 1.38     | 0.72     | 1.00       | 0.33 | 8        | 26         | 1.14E-137 |
| Q9Y3D8     | Adenylate kinase isoenzyme 6                                                | AD-004      | 1.16     | 1.24     | 0.61     | 1.64     | 1.00       | 0.34 | 4        | 30         | 8.62E-18  |
| Q8NBX      | Probable saccharopine                                                       | CGI-49      | 0.96     | 1.07     | 0.98     | 1.02     | 1.00       | 0.06 | 7        | 26         | 4.82E-45  |

| UniProt ID | Protein_Name                                | Gene Name | F1 (L/H) | F2 (L/H) | R1 (H/L) | R1 (L/H) | Mean (T/U) | S.D. | Pep. No. | %Seq. Cov. | PEP       |
|------------|---------------------------------------------|-----------|----------|----------|----------|----------|------------|------|----------|------------|-----------|
| 0          | dehydrogenase                               |           |          |          |          |          |            |      |          |            |           |
| P55809     | 3-oxoacid-CoA transferase 1                 | OXCT      | 1.02     | 0.93     | 1.06     | 0.94     | 1.00       | 0.07 | 9        | 24         | 8.31E-196 |
| P62841     | 40S ribosomal protein S15                   | RIG       | 0.99     | 1.08     | 0.94     | 1.06     | 1.00       | 0.07 | 6        | 64         | 1.69E-145 |
| Q9NX07-1   | SECP43                                      | SECP43    | 1.00     | 1.11     | 0.90     | 1.11     | 1.00       | 0.11 | 3        | 16         | 2.22E-10  |
| Q15436     | Protein transport protein Sec23A            | SEC23A    | 0.99     | 0.9      | 1.12     | 0.89     | 1.00       | 0.11 | 7        | 11         | 8.12E-27  |
| Q8IW48     | SDHA protein                                | SDHA      | 0.89     | 1.00     | 1.12     | 0.89     | 1.00       | 0.12 | 11       | 31         | 1.08E-143 |
| Q9BQA1     | Androgen receptor cofactor p44              | HKMT1069  | 1.10     | 1.09     | 0.82     | 1.22     | 1.00       | 0.16 | 5        | 18         | 1.10E-115 |
| Q86VY4     | Testis-specific Y-encoded-like protein 5    | KIAA1750  | 0.98     | 1.30     | 0.73     | 1.37     | 1.00       | 0.29 | 4        | 12         | 3.76E-61  |
| Q9UMY1-1   | Nucleolar protein 7                         | C6orf90   | 1.07     | 1.32     | 0.62     | 1.61     | 1.00       | 0.35 | 2        | 11         | 7.03E-24  |
| Q9H583     | HEAT repeat-containing protein 1            | BAP28     | 1.27     | 1.14     | 0.60     | 1.67     | 1.00       | 0.36 | 10       | 6          | 5.93E-53  |
| Q9Y2K7-1   | [Histone-H3]-lysine-36 demethylase 1A       | CXXC8     | 1.00     |          | 1.01     | 0.99     | 1.01       | 0.01 | 4        | 5.1        | 1.18E-11  |
| Q96EK6     | Glucosamine 6-phosphate N-acetyltransferase | GNA1      | 1.04     |          | 0.97     | 1.03     | 1.01       | 0.05 | 4        | 33         | 2.25E-33  |
| O00193     | Small acidic protein                        | C11orf58  | 1.04     | 0.97     |          |          | 1.01       | 0.05 | 3        | 25         | 1.55E-207 |
| Q14353     | Guanidinoacetate N-methyltransferase        | GAMT      | 0.96     |          | 1.05     | 0.95     | 1.01       | 0.06 | 5        | 30         | 3.69E-38  |
| Q9BUK6-1   | Protein misato homolog 1                    | LST005    |          | 0.95     | 1.06     | 0.94     | 1.01       | 0.08 | 2        | 6.8        | 9.62E-09  |
| Q5Y8C7     | Placenta derived apoptotic factor           | PDAF      |          | 0.95     | 1.06     | 0.94     | 1.01       | 0.08 | 2        | 19         | 8.06E-04  |
| Q6P1Q9-1   | Methyltransferase-like protein 2B           | METTL2B   | 1.06     | 0.95     |          |          | 1.01       | 0.08 | 3        | 8.5        | 1.82E-08  |
| O15270     | Long chain base biosynthesis protein 2      | KIAA0526  | 1.07     | 0.94     |          |          | 1.01       | 0.09 | 2        | 3.9        | 6.39E-11  |
| P41567     | Eukaryotic translation initiation factor 1  | EIF1      | 1.15     |          | 0.86     | 1.16     | 1.01       | 0.21 | 7        | 52         | 5.49E-61  |
| Q9UMY4-1   | Sorting nexin-12                            | SNX12     | 1.15     | 0.86     |          |          | 1.01       | 0.21 | 3        | 22         | 5.65E-07  |
| P27361     | Extracellular signal-regulated kinase 1     | ERK1      |          | 0.83     | 1.18     | 0.85     | 1.01       | 0.25 | 7        | 15         | 4.53E-10  |
| Q92544     | Transmembrane 9 superfamily member 4        | KIAA0255  | 1.18     |          | 0.83     | 1.20     | 1.01       | 0.25 | 4        | 9.2        | 1.38E-15  |
| Q9Y697-1   | Cysteine desulfurase, mitochondrial         | HUSSY-08  |          | 1.24     | 0.77     | 1.30     | 1.01       | 0.33 | 3        | 6.3        | 2.15E-06  |
| Q9P2N5     | RNA-binding motif protein 27                | KIAA1311  |          | 1.24     | 0.77     | 1.30     | 1.01       | 0.33 | 7        | 9.2        | 3.64E-35  |
| P52434     | DNA-directed RNA polymerase II subunit H    | POLR2H    | 0.93     | 1.08     |          |          | 1.01       | 0.11 | 5        | 37         | 2.72E-26  |
| Q9NV31     | U3 small nucleolar ribonucleoprotein        | C15orf12  | 1.11     |          | 0.90     | 1.11     | 1.01       | 0.15 | 4        | 26         | 5.40E-37  |

| UniProt ID | Protein_Name                                                  | Gene Name   | F1 (L/H) | F2 (L/H) | R1 (H/L) | R1 (L/H) | Mean (T/U) | S.D. | Pep. No. | %Seq. Cov. | PEP       |
|------------|---------------------------------------------------------------|-------------|----------|----------|----------|----------|------------|------|----------|------------|-----------|
|            | protein IMP3                                                  |             |          |          |          |          |            |      |          |            |           |
| P07195     | LDH heart subunit                                             | LDHB        | 1.01     | 1.00     | 1.01     | 0.99     | 1.01       | 0.01 | 28       | 63         | 0.00E+00  |
| Q9Y4G6     | Talin-2                                                       | KIAA0320    | 0.98     | 1.02     | 1.02     | 0.98     | 1.01       | 0.02 | 25       | 7.6        | 1.20E-216 |
| Q01105-2   | HLA-DR-associated protein II                                  | SET         | 1.00     | 1.04     | 0.98     | 1.02     | 1.01       | 0.03 | 14       | 48         | 0.00E+00  |
| P05455     | La autoantigen                                                | SSB         | 0.97     | 1.03     | 1.02     | 0.98     | 1.01       | 0.03 | 26       | 57         | 0.00E+00  |
| P09661     | U2 small nuclear ribonucleoprotein A                          | SNRPA1      | 1.02     | 1.03     | 0.97     | 1.03     | 1.01       | 0.03 | 13       | 49         | 0.00E+00  |
| Q15365     | Heterogeneous nuclear ribonucleoprotein E1                    | PCBP1       | 0.96     | 0.99     | 1.07     | 0.93     | 1.01       | 0.06 | 19       | 84         | 0.00E+00  |
| P12268     | IMPDH-II                                                      | IMPD2       | 1.04     | 1.04     | 0.94     | 1.06     | 1.01       | 0.06 | 25       | 65         | 1.60E-278 |
| P51149     | Ras-related protein Rab-7a                                    | RAB7        | 1.05     | 1.03     | 0.94     | 1.06     | 1.01       | 0.06 | 16       | 78         | 2.56E-281 |
| Q9UHX1-1   | 60 kDa poly(U)-binding-splicing factor                        | FIR         | 1.01     | 1.08     | 0.93     | 1.08     | 1.01       | 0.08 | 14       | 37         | 7.30E-128 |
| Q8WWM7-1   | Ataxin-2 domain protein                                       | A2D         | 1.03     | 1.07     | 0.92     | 1.09     | 1.01       | 0.08 | 24       | 28         | 4.54E-140 |
| P27986-4   | Phosphatidylinositol 3-kinase 85 kDa regulatory subunit alpha | GRB1        | 1.09     | 1.00     | 0.93     | 1.08     | 1.01       | 0.08 | 7        | 13         | 1.33E-38  |
| Q9NX58     | Cell growth-regulating nucleolar protein                      | LYAR        | 1.06     | 1.06     | 0.90     | 1.11     | 1.01       | 0.09 | 11       | 30         | 2.20E-118 |
| P49721     | Macropain subunit C7-I                                        | PSMB2       | 1.02     | 0.90     | 1.10     | 0.91     | 1.01       | 0.10 | 11       | 43         | 2.47E-114 |
| P39687     | Acidic leucine-rich nuclear phosphoprotein 32 family member A | ANP32A      | 0.91     | 0.99     | 1.12     | 0.89     | 1.01       | 0.11 | 15       | 55         | 3.60E-282 |
| A8MUT5     | Putative uncharacterized protein DKC1                         | DKC1        | 1.09     | 1.09     | 0.84     | 1.19     | 1.01       | 0.14 | 10       | 29         | 3.22E-67  |
| Q99848     | EBNA1-binding protein 2                                       | EBNA1BP2    | 1.08     | 1.10     | 0.84     | 1.19     | 1.01       | 0.14 | 10       | 29         | 1.38E-76  |
| A5PLL5     | SMARCD2 protein                                               | SMARCD2     | 1.00     | 0.86     | 1.16     | 0.86     | 1.01       | 0.15 | 6        | 14         | 8.38E-43  |
| Q7L5N1     | COP9 signalosome complex subunit 6                            | COPS6       | 0.88     | 0.94     | 1.20     | 0.83     | 1.01       | 0.17 | 6        | 19         | 4.59E-35  |
| Q15181     | Inorganic pyrophosphatase                                     | IOPPP       | 1.09     | 1.12     | 0.81     | 1.23     | 1.01       | 0.17 | 22       | 86         | 1.78E-285 |
| Q9C0B1-1   | Alpha-ketoglutarate-dependent dioxygenase FTO                 | FTO         | 0.91     | 0.90     | 1.21     | 0.83     | 1.01       | 0.18 | 6        | 13         | 8.98E-172 |
| Q00535     | Cell division protein kinase 5                                | CDK5        | 0.88     | 0.91     | 1.23     | 0.81     | 1.01       | 0.19 | 7        | 30         | 1.66E-30  |
| Q32Q12     | Nucleoside diphosphate kinase                                 | hCG_2001850 | 1.15     | 1.13     | 0.74     | 1.35     | 1.01       | 0.23 | 14       | 64         | 2.99E-281 |
| Q9BYG3     | MKI67 FHA domain-interacting nucleolar phosphoprotein         | MKI67IP     | 1.21     | 1.12     | 0.69     | 1.45     | 1.01       | 0.28 | 8        | 38         | 1.36E-153 |
| O60287     | Nucleolar pre-ribosomal-associated                            | C21orf108   | 1.07     | 1.30     | 0.65     | 1.54     | 1.01       | 0.33 | 6        | 4.3        | 1.45E-116 |



| UniProt ID | Protein_Name                                            | Gene Name | F1 (L/H) | F2 (L/H) | R1 (H/L) | R1 (L/H) | Mean (T/U) | S.D. | Pep. No. | %Seq. Cov. | PEP       |
|------------|---------------------------------------------------------|-----------|----------|----------|----------|----------|------------|------|----------|------------|-----------|
|            | protein 1                                               |           |          |          |          |          |            |      |          |            |           |
| P04040     | Catalase                                                | CAT       | 0.80     | 0.82     | 1.40     | 0.71     | 1.01       | 0.34 | 10       | 24         | 2.80E-101 |
| O15144     | Actin-related protein 2/3 complex subunit 2             | ARC34     | 0.80     | 0.79     | 1.43     | 0.70     | 1.01       | 0.37 | 14       | 54         | 1.25E-141 |
| Q96FZ2     | UPF0361 protein C3orf37                                 | C3orf37   | 1.29     | 1.14     | 0.59     | 1.69     | 1.01       | 0.37 | 5        | 16         | 7.84E-73  |
| Q709C8-1   | Vacuolar protein sorting-associated protein 13C         | KIAA1421  | 1.19     | 1.32     | 0.51     | 1.96     | 1.01       | 0.44 | 13       | 5          | 2.74E-108 |
| Q14019     | Coactosin-like protein                                  | CLP       | 0.65     | 0.62     | 1.75     | 0.57     | 1.01       | 0.64 | 9        | 51         | 4.60E-162 |
| Q14739     | Integral nuclear envelope inner membrane protein        | LBR       | 0.92     | 1.05     | 1.05     | 0.95     | 1.01       | 0.08 | 9        | 14         | 9.83E-77  |
| Q15637-5   | Mammalian branch point-binding protein                  | SF1       | 1.00     | 0.93     | 1.09     | 0.92     | 1.01       | 0.08 | 13       | 22         | 7.56E-136 |
| P49458     | Signal recognition particle 9 kDa protein               | SRP9      | 1.04     | 1.11     | 0.87     | 1.15     | 1.01       | 0.12 | 5        | 55         | 1.94E-22  |
| Q96SB8-2   | Structural maintenance of chromosomes protein 6         | SMC6      | 0.83     | 1.08     | 1.11     | 0.90     | 1.01       | 0.15 | 3        | 4.2        | 6.18E-09  |
| C9J1W7     | Putative uncharacterized protein SFRS15                 | SFRS15    | 1.11     | 1.12     | 0.79     | 1.27     | 1.01       | 0.19 | 9        | 12         | 6.38E-39  |
| Q15527     | Surfeit locus protein 2                                 | SURF2     |          | 1.01     | 1.01     | 0.99     | 1.01       | 0.00 | 3        | 13         | 8.89E-04  |
| P31943     | Heterogeneous nuclear ribonucleoprotein H               | HNRNP H1  | 1.00     | 1.02     | 1.01     | 0.99     | 1.01       | 0.01 | 17       | 54         | 0.00E+00  |
| Q9NRR5     | Ataxin-1 ubiquitin-like-interacting protein A1U         | C1orf6    |          | 1.02     | 1.00     | 1.00     | 1.01       | 0.01 | 4        | 10         | 3.84E-53  |
| Q9Y678     | Coatomer subunit gamma                                  | COPG      | 1.02     | 1.02     | 0.99     | 1.01     | 1.01       | 0.02 | 28       | 46         | 0.00E+00  |
| P17066     | Heat shock 70 kDa protein 6                             | HSP70 B   | 1.00     | 1.04     | 0.99     | 1.01     | 1.01       | 0.03 | 9        | 15         | 2.65E-168 |
| Q9NX55-1   | Huntingtin yeast partner K                              | C15orf63  | 0.99     | 1.03     |          |          | 1.01       | 0.03 | 2        | 15         | 3.72E-10  |
| A6NEM2     | Putative uncharacterized protein HCFC1                  | HCFC1     | 0.99     | 1.03     |          |          | 1.01       | 0.03 | 22       | 16         | 6.94E-179 |
| Q9H2G2-1   | CTCL tumor antigen se20-9                               | KIAA0204  | 0.99     | 0.99     | 1.05     | 0.95     | 1.01       | 0.03 | 13       | 12         | 6.98E-64  |
| Q9Y6X4-1   | Protein FAM169A                                         | FAM169A   | 0.97     | 1.02     | 1.04     | 0.96     | 1.01       | 0.04 | 7        | 17         | 3.08E-56  |
| Q86VP6-1   | Cullin-associated and neddylation-dissociated protein 1 | CAND1     | 0.99     | 0.98     | 1.06     | 0.94     | 1.01       | 0.04 | 39       | 42         | 0.00E+00  |
| P55072     | 15S Mg(2+)-ATPase p97 subunit                           | VCP       | 0.99     | 0.98     | 1.06     | 0.94     | 1.01       | 0.04 | 52       | 69         | 0.00E+00  |
| O95573     | Long-chain acyl-CoA synthetase 3                        | ACS3      | 0.95     | 1.05     | 1.03     | 0.97     | 1.01       | 0.05 | 3        | 6.7        | 1.15E-55  |
| P06744     | Autocrine motility factor                               | GPI       | 1.06     | 1.02     | 0.95     | 1.05     | 1.01       | 0.06 | 29       | 60         | 0.00E+00  |
| Q9Y2S2-1   | Lambda-crystallin homolog                               | CRY       | 0.94     | 1.05     | 1.04     | 0.96     | 1.01       | 0.06 | 3        | 16         | 4.44E-16  |

| UniProt ID | Protein_Name                                                                                        | Gene Name     | F1 (L/H) | F2 (L/H) | R1 (H/L) | R1 (L/H) | Mean (T/U) | S.D. | Pep. No. | %Seq. Cov. | PEP       |
|------------|-----------------------------------------------------------------------------------------------------|---------------|----------|----------|----------|----------|------------|------|----------|------------|-----------|
| Q5TDJ6     | CD1c molecule                                                                                       | CD1C          | 0.94     | 1.05     | 1.04     | 0.96     | 1.01       | 0.06 | 3        | 11         | 1.93E-42  |
| P06127     | Lymphocyte antigen T1/Leu-1                                                                         | CD5           | 0.94     | 1.05     | 1.04     | 0.96     | 1.01       | 0.06 | 4        | 8.9        | 3.27E-25  |
| Q13217     | DnaJ homolog subfamily C member 3                                                                   | DNAJC3        | 0.94     | 1.05     | 1.04     | 0.96     | 1.01       | 0.06 | 9        | 32         | 6.61E-127 |
| B2R6D7     | cDNA, FLJ92904, highly similar to Homo sapiens casein kinase 2, alpha 1 polypeptide (CSNK2A1), mRNA | CSNK2A1       | 1.02     | 1.07     | 0.94     | 1.06     | 1.01       | 0.07 | 14       | 50         | 5.43E-253 |
| O43837-1   | Isocitrate dehydrogenase [NAD] subunit beta, mitochondrial                                          | IDH3B         | 0.96     | 0.98     | 1.09     | 0.92     | 1.01       | 0.07 | 13       | 41         | 1.33E-144 |
| Q07955-1   | Alternative-splicing factor 1                                                                       | ASF           | 0.97     | 0.96     | 1.10     | 0.91     | 1.01       | 0.08 | 16       | 50         | 3.15E-135 |
| B7WPD3     | Putative uncharacterized protein TCEB2                                                              | hCG_1778969   | 1.03     | 1.08     | 0.92     | 1.09     | 1.01       | 0.08 | 4        | 28         | 8.63E-31  |
| Q9BZ17-1   | Nonsense mRNA reducing factor 3B                                                                    | RENT3B        | 1.08     | 1.03     | 0.92     | 1.09     | 1.01       | 0.08 | 5        | 9.3        | 3.29E-19  |
| B7Z2T5     | cDNA FLJ55427, highly similar to Sodium/potassium-transporting ATPase alpha-1 chain (EC 3.6.3.9)    | ATP1A1        | 1.02     | 1.10     | 0.91     | 1.10     | 1.01       | 0.10 | 15       | 20         | 5.39E-234 |
| P07741     | Adenine phosphoribosyltransferase                                                                   | APRT          | 1.07     | 1.06     | 0.90     | 1.11     | 1.01       | 0.10 | 12       | 81         | 2.15E-241 |
| P11233     | Ras-related protein Ral-A                                                                           | RAL           | 0.94     | 0.97     | 1.12     | 0.89     | 1.01       | 0.10 | 7        | 30         | 1.63E-98  |
| Q92572     | Adapter-related protein complex 3 sigma-1 subunit                                                   | AP3S1         | 1.08     |          | 0.94     | 1.06     | 1.01       | 0.10 | 3        | 11         | 2.87E-33  |
| Q9Y4A5-1   | 350/400 kDa PCAF-associated factor                                                                  | PAF400        | 0.94     | 1.13     | 0.96     | 1.04     | 1.01       | 0.10 | 5        | 1.5        | 5.91E-10  |
| Q99627     | COP9 homolog                                                                                        | COPS8         | 0.93     |          | 1.09     | 0.92     | 1.01       | 0.11 | 6        | 57         | 1.19E-91  |
| O95292-1   | Vesicle-associated membrane protein-associated protein B/C                                          | UNQ484/PRO983 | 0.92     | 0.95     | 1.16     | 0.86     | 1.01       | 0.13 | 6        | 24         | 4.51E-36  |
| B5MBX0     | Putative uncharacterized protein CDCA5                                                              | CDCA5         | 1.02     | 1.14     | 0.87     | 1.15     | 1.01       | 0.14 | 3        | 14         | 1.00E-36  |
| Q9BZE9-2   | Alveolar soft part sarcoma chromosomal region candidate gene 1 protein                              | ASPL          | 0.86     | 1.14     | 1.03     | 0.97     | 1.01       | 0.14 | 6        | 14         | 2.16E-52  |
| P30046     | D-dopachrome decarboxylase                                                                          | DDT           | 0.91     |          | 1.11     | 0.90     | 1.01       | 0.14 | 5        | 45         | 3.04E-26  |
| Q15363     | Membrane protein p24A                                                                               | RNP24         | 0.91     | 1.11     |          |          | 1.01       | 0.14 | 3        | 17         | 4.96E-22  |
| P49207     | 60S ribosomal protein                                                                               | RPL34         | 1.11     | 1.08     | 0.84     | 1.19     | 1.01       | 0.15 | 6        | 33         | 4.02E-22  |

| UniProt ID | Protein_Name                                                    | Gene Name        | F1 (L/H) | F2 (L/H) | R1 (H/L) | R1 (L/H) | Mean (T/U) | S.D. | Pep. No. | %Seq. Cov. | PEP       |
|------------|-----------------------------------------------------------------|------------------|----------|----------|----------|----------|------------|------|----------|------------|-----------|
|            | L34                                                             |                  |          |          |          |          |            |      |          |            |           |
| Q9P013     | Protein CWC15 homolog                                           | AD-002           | 0.89     | 1.18     | 0.96     | 1.04     | 1.01       | 0.15 | 4        | 24         | 3.16E-72  |
| Q9H444     | Charged multivesicular body protein 4b                          | C20orf178        | 0.90     | 1.20     | 0.93     | 1.08     | 1.01       | 0.17 | 4        | 23         | 3.97E-88  |
| B4DKQ5     | cDNA FLJ54710, highly similar to Target of Myb protein 1        | CTA-286B10.5-010 | 0.89     |          | 1.13     | 0.88     | 1.01       | 0.17 | 3        | 11         | 6.60E-41  |
| O15116     | Cancer-associated Sm-like                                       | CASM             | 1.13     |          | 0.89     | 1.12     | 1.01       | 0.17 | 2        | 17         | 8.45E-05  |
| P27708     | Aspartate carbamoyltransferase                                  | CAD              | 1.11     | 1.11     | 0.81     | 1.23     | 1.01       | 0.17 | 34       | 24         | 3.08E-178 |
| Q92608-1   | Dedicator of cytokinesis protein 2                              | DOCK2            | 1.13     | 1.09     | 0.81     | 1.23     | 1.01       | 0.17 | 16       | 11         | 1.04E-86  |
| P55884-2   | eIF3 p110                                                       | EIF3B            | 1.11     | 1.20     | 0.72     | 1.39     | 1.01       | 0.26 | 22       | 31         | 2.36E-247 |
| P08107     | Heat shock 70 kDa protein 1/2                                   | HSPA1            | 1.15     | 1.17     | 0.71     | 1.41     | 1.01       | 0.26 | 16       | 31         | 5.20E-205 |
| Q9NYL9     | Tropomodulin-3                                                  | TMOD3            | 0.82     |          | 1.20     | 0.83     | 1.01       | 0.27 | 8        | 40         | 2.94E-52  |
| P07384     | Calcium-activated neutral proteinase 1                          | CANPL1           | 0.87     | 0.84     | 1.32     | 0.76     | 1.01       | 0.27 | 8        | 16         | 2.85E-62  |
| Q9Y4B4     | Androgen receptor-interacting protein 4                         | ARIP4            | 1.22     |          | 0.80     | 1.25     | 1.01       | 0.30 | 2        | 3          | 8.38E-26  |
| O14641     | DSH homolog 2                                                   | DVL2             | 0.78     | 0.86     | 1.39     | 0.72     | 1.01       | 0.33 | 2        | 3.3        | 1.96E-10  |
| O95163     | Elongator complex protein 1                                     | ELP1             | 1.04     | 1.36     | 0.63     | 1.59     | 1.01       | 0.37 | 3        | 2.7        | 5.37E-08  |
| P16401     | Histone H1.5                                                    | H1F5             | 0.78     | 0.81     | 1.44     | 0.69     | 1.01       | 0.37 | 16       | 44         | 1.40E-191 |
| Q99614     | Tetratricopeptide repeat protein 1                              | TPR1             | 1.29     | 1.18     | 0.56     | 1.79     | 1.01       | 0.39 | 6        | 31         | 1.61E-10  |
| Q9BRQ6     | Coiled-coil-helix-coiled-coil-helix domain-containing protein 6 | CHCHD6           | 0.64     | 0.76     | 1.63     | 0.61     | 1.01       | 0.54 | 6        | 40         | 3.13E-38  |
| C9JX46     | Putative uncharacterized protein ECD                            | ECD              |          |          | 1.01     | 0.99     | 1.01       |      | 2        | 6.6        | 2.59E-61  |
| Q9BVL2-1   | Nucleoporin p58/p45                                             | KIAA0410         | 1.01     |          |          |          | 1.01       |      | 2        | 3.3        | 3.48E-13  |
| Q9NWS8-1   | Required for meiotic nuclear division protein 1 homolog         | C6orf96          |          | 1.01     |          |          | 1.01       |      | 2        | 5.1        | 1.27E-15  |
| A6NCU1     | Putative uncharacterized protein BCAP29                         | BCAP29           | 1.01     |          |          |          | 1.01       |      | 2        | 6.6        | 5.12E-03  |
| Q9NPJ8-3   | NTF2-related export protein 2                                   | BM-025           |          | 1.01     |          |          | 1.01       |      | 2        | 7.6        | 2.87E-02  |
| Q6DKK2     | Tetratricopeptide repeat protein 19                             | TTC19            |          | 1.01     |          |          | 1.01       |      | 3        | 6          | 1.16E-15  |
| A8MQB6     | Putative uncharacterized                                        | COMM D8          | 1.01     |          |          |          | 1.01       |      | 3        | 28         | 2.58E-119 |

| UniProt ID | Protein_Name                                                                                                             | Gene Name | F1 (L/H) | F2 (L/H) | R1 (H/L) | R1 (L/H) | Mean (T/U) | S.D. | Pep. No. | %Seq. Cov. | PEP       |
|------------|--------------------------------------------------------------------------------------------------------------------------|-----------|----------|----------|----------|----------|------------|------|----------|------------|-----------|
|            | protein COMMD8                                                                                                           |           |          |          |          |          |            |      |          |            |           |
| Q6N069-1   | N-alpha-acetyltransferase 16, NatA auxiliary subunit                                                                     | NAA16     | 1.01     |          |          |          | 1.01       |      | 4        | 3.9        | 4.49E-13  |
| Q96G03     | Glucose phosphomutase 2                                                                                                  | MSTP006   | 1.17     | 1.01     | 0.86     | 1.16     | 1.01       | 0.16 | 13       | 30         | 2.75E-101 |
| Q9NP92     | 28S ribosomal protein S30, mitochondrial                                                                                 | BM-047    | 1.01     | 1.01     | 1.02     | 0.98     | 1.01       | 0.01 | 2        | 7.3        | 3.22E-12  |
| Q6PD62     | RNA polymerase-associated protein CTR9 homolog                                                                           | CTR9      | 1.02     | 1.00     | 1.02     | 0.98     | 1.01       | 0.01 | 8        | 10         | 6.07E-34  |
| P21964-1   | Catechol O-methyltransferase                                                                                             | COMT      | 1.03     | 1.01     | 1.00     | 1.00     | 1.01       | 0.02 | 9        | 52         | 5.29E-121 |
| Q6ZUY8     | cDNA FLJ43203 fis, clone FEBRA2008468, highly similar to LYSOSOMAL ACID LIPASE/CHOLESTERYL ESTER HYDROLASE (EC 3.1.1.13) | LIPA      | 0.99     | 1.02     | 1.03     | 0.97     | 1.01       | 0.02 | 3        | 12         | 1.12E-06  |
| P27707     | Deoxycytidine kinase                                                                                                     | DCK       | 1.01     | 0.99     | 1.04     | 0.96     | 1.01       | 0.03 | 7        | 35         | 6.28E-34  |
| Q70J99-1   | Munc13-4                                                                                                                 | UNC13D    | 0.98     | 1.02     | 1.04     | 0.96     | 1.01       | 0.03 | 5        | 7.1        | 9.14E-29  |
| Q92905     | COP9 signalosome complex subunit 5                                                                                       | COPS5     | 0.97     | 1.01     | 1.06     | 0.94     | 1.01       | 0.05 | 6        | 23         | 1.60E-23  |
| O94906     | Pre-mRNA-processing factor 6                                                                                             | C20orf14  | 0.99     | 0.98     | 1.07     | 0.93     | 1.01       | 0.05 | 26       | 28         | 1.25E-175 |
| P46439     | Glutathione S-transferase Mu 5                                                                                           | GSTM5     | 0.94     | 1.06     | 1.04     | 0.96     | 1.01       | 0.06 | 11       | 37         | 1.59E-89  |
| Q86UE4     | 3D3/LYRIC                                                                                                                | AEG1      | 0.99     | 1.09     | 0.96     | 1.04     | 1.01       | 0.07 | 14       | 36         | 2.47E-129 |
| B4E1T5     | cDNA FLJ55764, highly similar to Apolipoprotein-L2                                                                       | APOL2     | 0.99     | 1.10     | 0.95     | 1.05     | 1.01       | 0.08 | 3        | 8.2        | 1.45E-12  |
| P54819-1   | Adenylate kinase 2, mitochondrial                                                                                        | ADK2      | 0.93     | 1.02     | 1.09     | 0.92     | 1.01       | 0.08 | 10       | 56         | 1.96E-187 |
| Q86V88-1   | Magnesium-dependent phosphatase 1                                                                                        | MDP1      | 0.92     | 1.09     | 1.03     | 0.97     | 1.01       | 0.09 | 3        | 26         | 3.73E-165 |
| Q9BV44     | THUMP domain-containing protein 3                                                                                        | THUMP3    | 0.99     | 1.12     | 0.93     | 1.08     | 1.01       | 0.10 | 7        | 20         | 9.48E-73  |
| P14618-1   | Cytosolic thyroid hormone-binding protein                                                                                | OIP3      | 0.94     | 0.97     | 1.13     | 0.88     | 1.01       | 0.10 | 44       | 75         | 0.00E+00  |
| P28482     | Extracellular signal-regulated kinase 2                                                                                  | ERK2      | 0.94     | 0.96     | 1.14     | 0.88     | 1.01       | 0.11 | 14       | 47         | 1.54E-60  |
| Q15102     | PAF acetylhydrolase 29 kDa subunit                                                                                       | PAFAH1B3  | 0.94     | 0.94     | 1.16     | 0.86     | 1.01       | 0.13 | 10       | 59         | 2.24E-135 |
| O95831-1   | Apoptosis-inducing factor 1, mitochondrial                                                                               | AIF       | 0.95     | 0.92     | 1.17     | 0.85     | 1.01       | 0.14 | 13       | 30         | 1.54E-178 |
| Q14566     | DNA replication licensing factor                                                                                         | MCM6      | 0.91     | 0.96     | 1.17     | 0.85     | 1.01       | 0.14 | 44       | 53         | 0.00E+00  |

| UniProt ID | Protein_Name                                                                       | Gene Name | F1 (L/H) | F2 (L/H) | R1 (H/L) | R1 (L/H) | Mean (T/U) | S.D. | Pep. No. | %Seq. Cov. | PEP       |
|------------|------------------------------------------------------------------------------------|-----------|----------|----------|----------|----------|------------|------|----------|------------|-----------|
|            | MCM6                                                                               |           |          |          |          |          |            |      |          |            |           |
| Q8WVJ2     | NudC domain-containing protein 2                                                   | NUDC D2   | 1.11     | 1.09     | 0.84     | 1.19     | 1.01       | 0.15 | 3        | 30         | 3.83E-81  |
| Q7KZ85-1   | Tat-cotransactivator 2 protein                                                     | KIAA0162  | 1.12     | 1.09     | 0.83     | 1.20     | 1.01       | 0.16 | 24       | 21         | 1.74E-210 |
| Q6PKC0     | GMP reductase                                                                      | GMPR2     | 0.87     | 0.98     | 1.19     | 0.84     | 1.01       | 0.16 | 5        | 16         | 1.38E-50  |
| O43447     | Peptidyl-prolyl cis-trans isomerase H                                              | CYP20     | 1.10     | 1.14     | 0.80     | 1.25     | 1.01       | 0.19 | 5        | 28         | 1.49E-16  |
| O75396     | ER-Golgi SNARE of 24 kDa                                                           | SEC22 B   | 0.88     | 0.90     | 1.26     | 0.79     | 1.01       | 0.21 | 13       | 61         | 5.92E-219 |
| Q96EY8     | Cob(I)alamin adenosyltransferase                                                   | MMAB      | 1.02     | 1.23     | 0.79     | 1.27     | 1.01       | 0.22 | 2        | 10         | 9.41E-41  |
| Q5JTZ9     | Alanine--tRNA ligase                                                               | AARS2     | 0.84     | 0.86     | 1.34     | 0.75     | 1.01       | 0.28 | 14       | 21         | 1.57E-118 |
| B3KXY9     | cDNA FLJ46359 fis, clone TESTI4049786, highly similar to Hexokinase-1 (EC 2.7.1.1) | HK1       | 0.83     | 0.86     | 1.35     | 0.74     | 1.01       | 0.29 | 10       | 11         | 4.08E-82  |
| P43897-2   | Elongation factor Ts, mitochondrial                                                | TSMF      | 1.20     | 1.20     | 0.64     | 1.56     | 1.01       | 0.32 | 4        | 25         | 4.04E-35  |
| P57088     | Protein DB83                                                                       | DB83      | 1.17     |          | 0.86     | 1.16     | 1.02       | 0.22 | 3        | 13         | 1.19E-25  |
| P00492     | Hypoxanthine-guanine phosphoribosyltransferase                                     | HPRT      | 1.01     |          | 1.02     | 0.98     | 1.02       | 0.01 | 9        | 45         | 3.53E-144 |
| Q96S52-1   | GPI transamidase component PIG-S                                                   | PIGS      | 0.92     |          | 1.11     | 0.90     | 1.02       | 0.13 | 3        | 8.3        | 9.23E-95  |
| Q6DD87     | TTF-I-interacting peptide 20                                                       | ZNF787    |          | 0.81     | 1.22     | 0.82     | 1.02       | 0.29 | 2        | 7          | 2.57E-02  |
| Q99497     | Oncogene DJ1                                                                       | PARK7     | 1.04     | 1.01     | 1.00     | 1.00     | 1.02       | 0.02 | 16       | 83         | 0.00E+00  |
| P49841-2   | Glycogen synthase kinase-3 beta                                                    | GSK3B     | 1.02     | 0.99     | 1.04     | 0.96     | 1.02       | 0.03 | 7        | 30         | 2.00E-99  |
| Q8TBA6-1   | Cell proliferation-inducing gene 31 protein                                        | GOLGA5    | 1.00     | 1.00     | 1.05     | 0.95     | 1.02       | 0.03 | 2        | 2.5        | 4.97E-03  |
| P19338     | Nucleolin                                                                          | NCL       | 1.01     | 1.05     | 0.99     | 1.01     | 1.02       | 0.03 | 45       | 44         | 0.00E+00  |
| Q8WVM8     | Sec1 family domain-containing protein 1                                            | C14orf163 | 0.98     | 1.02     | 1.05     | 0.95     | 1.02       | 0.04 | 13       | 32         | 1.62E-257 |
| P08579     | U2 small nuclear ribonucleoprotein B                                               | SNRPB2    | 0.97     | 1.02     | 1.06     | 0.94     | 1.02       | 0.05 | 9        | 42         | 1.07E-69  |
| Q9NQR4     | Nitrilase homolog 2                                                                | CUA002    | 1.08     | 1.00     | 0.97     | 1.03     | 1.02       | 0.06 | 14       | 70         | 1.27E-164 |
| P36957     | 2-oxoglutarate dehydrogenase complex component E2                                  | DLTS      | 0.95     | 1.04     | 1.06     | 0.94     | 1.02       | 0.06 | 7        | 16         | 1.01E-49  |
| Q9UBU9     | mRNA export factor TAP                                                             | NXF1      | 0.96     | 1.00     | 1.09     | 0.92     | 1.02       | 0.07 | 7        | 15         | 1.40E-85  |
| Q9H3U1-1   | GCUNC-45                                                                           | SMAP1     | 1.07     | 0.94     | 1.04     | 0.96     | 1.02       | 0.07 | 7        | 9.2        | 4.74E-46  |
| Q13098     | COP9 signalosome                                                                   | COPS1     | 1.13     | 0.96     | 0.96     | 1.04     | 1.02       | 0.10 | 5        | 15         | 8.08E-49  |

| UniProt ID | Protein_Name                                                    | Gene Name | F1 (L/H) | F2 (L/H) | R1 (H/L) | R1 (L/H) | Mean (T/U) | S.D. | Pep. No. | %Seq. Cov. | PEP       |
|------------|-----------------------------------------------------------------|-----------|----------|----------|----------|----------|------------|------|----------|------------|-----------|
| -7         | complex subunit 1                                               |           |          |          |          |          |            |      |          |            |           |
| P30153     | Medium tumor antigen-associated 61 kDa protein                  | PPP2R1A   | 0.95     | 0.96     | 1.14     | 0.88     | 1.02       | 0.11 | 29       | 57         | 0.00E+00  |
| P68371     | Tubulin beta-2 chain                                            | TUBB2C    | 0.94     | 0.97     | 1.14     | 0.88     | 1.02       | 0.11 | 28       | 75         | 0.00E+00  |
| Q9UJZ1     | EPB72-like protein 2                                            | HSPC108   | 1.11     | 1.06     | 0.88     | 1.14     | 1.02       | 0.12 | 15       | 61         | 0.00E+00  |
| P30048     | Antioxidant protein 1                                           | AOP1      | 0.93     | 0.96     | 1.16     | 0.86     | 1.02       | 0.13 | 8        | 43         | 2.75E-131 |
| P19784     | Casein kinase II subunit alpha                                  | CK2A2     | 0.94     | 1.17     | 0.94     | 1.06     | 1.02       | 0.13 | 12       | 47         | 1.22E-97  |
| Q9UPQ9-3   | Trinucleotide repeat-containing gene 6B protein                 | KIAA1093  | 0.89     | 1.00     | 1.16     | 0.86     | 1.02       | 0.14 | 5        | 2.9        | 5.18E-50  |
| Q9NWH9     | Modulator of estrogen-induced transcription                     | MET       | 0.87     | 1.02     | 1.16     | 0.86     | 1.02       | 0.15 | 18       | 18         | 2.33E-46  |
| Q92945-1   | Far upstream element-binding protein 2                          | FUBP2     | 0.90     | 0.96     | 1.19     | 0.84     | 1.02       | 0.15 | 36       | 55         | 0.00E+00  |
| B3V096     | BetaCstF-64 variant 2                                           | CSTF2     | 1.08     | 1.13     | 0.84     | 1.19     | 1.02       | 0.16 | 9        | 23         | 2.26E-96  |
| A8MVJ7     | Putative uncharacterized protein SCFD1                          | SCFD1     | 0.92     | 1.21     | 0.92     | 1.09     | 1.02       | 0.17 | 6        | 15         | 2.22E-25  |
| Q16555     | Collapsin response mediator protein 2                           | CRMP2     | 0.93     | 0.91     | 1.21     | 0.83     | 1.02       | 0.17 | 22       | 58         | 8.98E-265 |
| P11177-1   | Pyruvate dehydrogenase E1 component subunit beta, mitochondrial | PDHB      | 0.94     | 0.90     | 1.21     | 0.83     | 1.02       | 0.17 | 11       | 41         | 3.48E-205 |
| Q9HCN8     | PWP1-interacting protein 8                                      | SDF2L1    | 1.16     | 1.10     | 0.79     | 1.27     | 1.02       | 0.20 | 21       | 55         | 4.65E-195 |
| P25490     | Delta transcription factor                                      | INO80S    | 0.83     | 0.98     | 1.24     | 0.81     | 1.02       | 0.21 | 5        | 11         | 3.16E-78  |
| Q9BUT1-1   | 3-hydroxybutyrate dehydrogenase type 2                          | BDH2      | 0.86     | 0.92     | 1.27     | 0.79     | 1.02       | 0.22 | 6        | 32         | 1.28E-104 |
| A7E2E7     | TBC1 domain family, member 13                                   | TBC1D13   | 0.95     | 0.76     | 1.34     | 0.75     | 1.02       | 0.30 | 3        | 12         | 7.83E-20  |
| B4DJA0     | NADH-ubiquinone oxidoreductase 75 kDa subunit                   | hCG_17250 | 0.97     | 0.62     | 1.46     | 0.68     | 1.02       | 0.42 | 4        | 8.8        | 3.28E-75  |
| Q96SB3     | Neurabin-2                                                      | PPP1R6    | 0.80     | 0.73     | 1.52     | 0.66     | 1.02       | 0.44 | 3        | 5.8        | 2.31E-62  |
| Q14703     | Endopeptidase S1P                                               | KIAA0091  | 1.06     | 1.06     | 0.93     | 1.08     | 1.02       | 0.08 | 2        | 1.6        | 1.27E-01  |
| P17252     | Protein kinase C alpha type                                     | PKCA      | 0.93     | 1.02     | 1.10     | 0.91     | 1.02       | 0.09 | 4        | 5.2        | 7.48E-05  |
| P49257     | ER-Golgi intermediate compartment 53 kDa protein                | ERGIC53   | 1.09     | 1.11     | 0.85     | 1.18     | 1.02       | 0.14 | 8        | 19         | 2.22E-58  |
| P60842     | ATP-dependent RNA helicase eIF4A-1                              | DDX2A     | 1.09     | 1.11     | 0.85     | 1.18     | 1.02       | 0.14 | 22       | 57         | 1.82E-285 |
| P62191     | 26S protease regulatory subunit 4                               | PSMC1     | 1.10     | 1.12     | 0.83     | 1.20     | 1.02       | 0.16 | 17       | 42         | 0.00E+00  |
| A8K878     | cDNA FLJ77177,                                                  | ARME      | 1.00     | 1.20     | 0.85     | 1.18     | 1.02       | 0.18 | 8        | 32         | 4.64E-97  |

| UniProt ID | Protein_Name                                                                              | Gene Name | F1 (L/H) | F2 (L/H) | R1 (H/L) | R1 (L/H) | Mean (T/U) | S.D. | Pep. No. | %Seq. Cov. | PEP       |
|------------|-------------------------------------------------------------------------------------------|-----------|----------|----------|----------|----------|------------|------|----------|------------|-----------|
|            | highly similar to Homo sapiens arginine-rich, mutated in early stage tumors (ARMET), mRNA | T         |          |          |          |          |            |      |          |            |           |
| Q13823     | Autoantigen NGP-1                                                                         | GNL2      | 1.06     | 1.18     | 0.81     | 1.23     | 1.02       | 0.19 | 5        | 9.8        | 4.16E-14  |
| Q9NY27-1   | Serine/threonine-protein phosphatase 4 regulatory subunit 2                               | PPP4R2    | 0.90     | 1.15     | 1.01     | 0.99     | 1.02       | 0.13 | 6        | 16         | 5.67E-52  |
| B7Z6L9     | cDNA FLJ54755, highly similar to Vacuolar ATP synthase subunit d (EC 3.6.3.14)            | ATP6D     | 0.94     | 0.94     | 1.18     | 0.85     | 1.02       | 0.14 | 3        | 9.7        | 9.01E-11  |
| Q9H944     | Mediator complex subunit 20                                                               | MED20     | 1.01     | 1.17     | 0.88     | 1.14     | 1.02       | 0.15 | 6        | 36         | 7.50E-22  |
| Q9NUB1-1   | Acetate--CoA ligase 2                                                                     | ACAS2L    | 0.96     | 0.90     | 1.20     | 0.83     | 1.02       | 0.16 | 7        | 15         | 4.08E-35  |
| P35998     | 26S protease regulatory subunit 7                                                         | MSS1      | 1.11     | 1.15     | 0.80     | 1.25     | 1.02       | 0.19 | 18       | 46         | 5.31E-192 |
| B4DW28     | cDNA FLJ58953, highly similar to 40S ribosomal protein S20                                | RPS20     | 1.16     | 1.10     | 0.80     | 1.25     | 1.02       | 0.19 | 6        | 32         | 7.85E-60  |
| Q68CP9-1   | AT-rich interactive domain-containing protein 2                                           | ARID2     | 1.28     | 1.23     | 0.55     | 1.82     | 1.02       | 0.41 | 5        | 5          | 3.03E-13  |
| O75145-1   | Liprin-alpha-3                                                                            | KIAA0654  |          | 1.01     | 1.03     | 0.97     | 1.02       | 0.01 | 3        | 4.1        | 3.76E-05  |
| P51858     | Hepatoma-derived growth factor                                                            | HDGF      | 1.00     | 1.02     | 1.04     | 0.96     | 1.02       | 0.02 | 11       | 55         | 4.22E-130 |
| O95197-1   | Neuroendocrine-specific protein-like 2                                                    | ASYIP     |          | 1.04     | 1.00     | 1.00     | 1.02       | 0.03 | 2        | 1.9        | 1.91E-05  |
| Q99785     | Putative uncharacterized protein                                                          | PIG11     | 1.00     | 1.00     | 1.06     | 0.94     | 1.02       | 0.03 | 2        | 6.4        | 6.52E-04  |
| P52758     | 14.5 kDa translational inhibitor protein                                                  | HRSP12    | 1.04     | 1.04     | 0.98     | 1.02     | 1.02       | 0.03 | 3        | 32         | 9.90E-14  |
| Q13404-1   | CROC-1                                                                                    | CROC1     | 1.01     | 0.99     | 1.06     | 0.94     | 1.02       | 0.04 | 5        | 13         | 4.32E-21  |
| P62304     | Sm protein E                                                                              | SNRPE     | 0.99     |          | 1.05     | 0.95     | 1.02       | 0.04 | 4        | 57         | 2.91E-33  |
| P04406     | Glyceraldehyde-3-phosphate dehydrogenase                                                  | CDABP0047 | 1.06     |          | 0.98     | 1.02     | 1.02       | 0.06 | 26       | 82         | 0.00E+00  |
| P06132     | Uroporphyrinogen decarboxylase                                                            | UROD      | 0.97     |          | 1.07     | 0.93     | 1.02       | 0.07 | 7        | 28         | 5.64E-122 |
| Q59GX2     | Solute carrier family 2 (Facilitated glucose transporter), member 1 variant               | GLUT1     | 0.96     |          | 1.08     | 0.93     | 1.02       | 0.08 | 2        | 3.1        | 8.59E-04  |
| P61981     | 14-3-3 protein gamma                                                                      | YWHA G    | 0.94     | 1.01     | 1.11     | 0.90     | 1.02       | 0.09 | 20       | 79         | 0.00E+00  |
| C9J0D0     | Putative uncharacterized protein PTMA                                                     | PTMA      | 1.03     | 1.10     | 0.93     | 1.08     | 1.02       | 0.09 | 7        | 22         | 2.74E-229 |

| UniProt ID | Protein_Name                                                                         | Gene Name | F1 (L/H) | F2 (L/H) | R1 (H/L) | R1 (L/H) | Mean (T/U) | S.D. | Pep. No. | %Seq. Cov. | PEP       |
|------------|--------------------------------------------------------------------------------------|-----------|----------|----------|----------|----------|------------|------|----------|------------|-----------|
| P36915-1   | GTP-binding protein HSR1                                                             | GNL1      | 1.00     | 1.12     | 0.94     | 1.06     | 1.02       | 0.09 | 10       | 20         | 6.99E-57  |
| Q96AG4     | Leucine-rich repeat-containing protein 59                                            | LRRC59    | 1.08     | 1.09     | 0.89     | 1.12     | 1.02       | 0.11 | 14       | 54         | 5.52E-225 |
| Q969P0-1   | CD81 partner 3                                                                       | CD81P3    | 0.94     | 1.10     |          |          | 1.02       | 0.11 | 3        | 6.5        | 2.29E-19  |
| P09543-1   | 2,3-cyclic-nucleotide 3-phosphodiesterase                                            | CNP       | 0.90     | 1.03     | 1.13     | 0.88     | 1.02       | 0.12 | 9        | 30         | 2.67E-99  |
| Q9BQ61     | Uncharacterized protein C19orf43                                                     | C19orf43  | 1.01     | 1.14     | 0.91     | 1.10     | 1.02       | 0.12 | 8        | 46         | 7.26E-20  |
| Q14697-1   | Alpha-glucosidase 2                                                                  | G2AN      | 0.92     | 0.95     | 1.19     | 0.84     | 1.02       | 0.15 | 49       | 52         | 0.00E+00  |
| P49189     | 4-trimethylaminobutyral dehyde dehydrogenase                                         | ALDH4     | 0.91     | 0.96     | 1.19     | 0.84     | 1.02       | 0.15 | 8        | 16         | 2.32E-105 |
| Q96DH6-1   | RNA-binding protein Musashi homolog 2                                                | MSI2      | 0.91     |          | 1.13     | 0.88     | 1.02       | 0.16 | 4        | 23         | 6.40E-93  |
| A6XMH4     | Beta-2-microglobulin                                                                 | B2M       | 0.92     | 0.93     | 1.21     | 0.83     | 1.02       | 0.16 | 4        | 39         | 1.45E-38  |
| Q8WUM5     | Gem (Nuclear organelle) associated protein 4                                         | GEMIN4    |          | 1.14     | 0.90     | 1.11     | 1.02       | 0.17 | 2        | 4.5        | 2.43E-04  |
| P05204     | High mobility group nucleosome-binding domain-containing protein 2                   | HMG17     |          | 1.14     | 0.90     | 1.11     | 1.02       | 0.17 | 4        | 52         | 7.38E-28  |
| B4DNJ6     | cDNA FLJ51909, highly similar to Serine-threonine kinase receptor-associated protein | MAWD      | 1.11     | 1.13     | 0.82     | 1.22     | 1.02       | 0.17 | 18       | 64         | 3.78E-209 |
| O15027-5   | Protein transport protein Sec16A                                                     | KIAA0310  | 1.07     | 1.17     | 0.82     | 1.22     | 1.02       | 0.18 | 14       | 11         | 1.29E-41  |
| Q969U7     | Hepatocellular carcinoma-susceptibility protein 3                                    | HCCA3     | 1.06     | 1.18     | 0.82     | 1.22     | 1.02       | 0.18 | 5        | 21         | 5.98E-11  |
| P33527-1   | ATP-binding cassette sub-family C member 1                                           | ABCC1     | 1.16     |          | 0.88     | 1.14     | 1.02       | 0.20 | 5        | 5          | 1.73E-09  |
| Q9BUJ2-1   | Adenovirus early region 1B-associated protein 5                                      | E1BAP5    | 0.90     | 0.87     | 1.29     | 0.78     | 1.02       | 0.23 | 26       | 37         | 3.38E-188 |
| B4DGP8     | Calnexin                                                                             | CANX      | 1.19     | 1.14     | 0.73     | 1.37     | 1.02       | 0.25 | 19       | 29         | 4.82E-141 |
| Q07021     | Complement component 1 Q subcomponent-binding protein, mitochondrial                 | C1QBP     | 1.20     |          | 0.84     | 1.19     | 1.02       | 0.25 | 9        | 44         | 1.11E-184 |
| Q9UKM9-1   | Autoantigen p542                                                                     | HNRPC L2  | 0.85     | 0.87     | 1.34     | 0.75     | 1.02       | 0.28 | 18       | 66         | 3.53E-99  |
| Q9HAV0     | Guanine nucleotide-binding protein subunit beta-4                                    | GNB4      |          | 0.82     | 1.22     | 0.82     | 1.02       | 0.28 | 6        | 19         | 5.18E-20  |



| UniProt ID | Protein_Name                                               | Gene Name | F1 (L/H) | F2 (L/H) | R1 (H/L) | R1 (L/H) | Mean (T/U) | S.D. | Pep. No. | %Seq. Cov. | PEP       |
|------------|------------------------------------------------------------|-----------|----------|----------|----------|----------|------------|------|----------|------------|-----------|
| Q8N5M4     | Tetratricopeptide repeat protein 9C                        | TTC9C     | 0.86     | 0.85     | 1.35     | 0.74     | 1.02       | 0.29 | 7        | 30         | 3.70E-22  |
| Q7KZI7-1   | ELKL motif kinase 1                                        | EMK1      | 0.77     | 1.27     |          |          | 1.02       | 0.35 | 2        | 4.1        | 2.37E-08  |
| Q13011     | Delta(3,5)-Delta(2,4)-dienoyl-CoA isomerase, mitochondrial | ECH1      | 0.76     | 0.84     | 1.46     | 0.68     | 1.02       | 0.38 | 16       | 59         | 1.09E-211 |
| Q16637-1   | Gemin-1                                                    | SMN       | 1.42     | 0.99     | 0.65     | 1.54     | 1.02       | 0.39 | 5        | 17         | 4.75E-81  |
| B1AMT5     | Stromal antigen 2                                          | hCG_15646 | 0.74     |          | 1.30     | 0.77     | 1.02       | 0.40 | 7        | 6.9        | 1.97E-41  |
| Q01831     | DNA repair protein complementing XP-C cells                | XPC       |          |          | 1.02     | 0.98     | 1.02       |      | 2        | 4.4        | 2.02E-16  |
| Q9UGU0     | Nuclear factor SPBP                                        | KIAA0292  |          |          | 1.02     | 0.98     | 1.02       |      | 2        | 1.5        | 1.03E-03  |
| Q8IWI9-2   | Codanin-1                                                  | CDAN1     |          |          | 1.02     | 0.98     | 1.02       |      | 2        | 3.5        | 9.07E-26  |
| Q8NDT2     | One-twenty two protein 3                                   | OTT3      |          |          | 1.02     | 0.98     | 1.02       |      | 5        | 7.2        | 1.40E-11  |
| Q8WZ42-8   | Connectin                                                  | TTN       |          |          | 1.02     | 0.98     | 1.02       |      | 7        | 0.2        | 5.28E-05  |
| O95999     | B-cell CLL/lymphoma 10                                     | BCL10     |          | 1.02     |          |          | 1.02       |      | 2        | 9          | 2.01E-04  |
| P35914     | 3-hydroxy-3-methylglutarate-CoA lyase                      | HMGC L    |          | 1.02     |          |          | 1.02       |      | 2        | 5.2        | 1.84E-14  |
| Q5VZE5     | Embryonic growth-associated protein homolog                | EGAP      |          | 1.02     |          |          | 1.02       |      | 2        | 2.8        | 3.91E-03  |
| Q8TAF3-1   | USP1-associated factor 1                                   | KIAA1449  |          | 1.02     |          |          | 1.02       |      | 2        | 3.2        | 1.73E-04  |
| Q6ZRP7     | Neuroblastoma-derived sulfhydryl oxidase                   | QSCN6 L1  | 1.02     |          |          |          | 1.02       |      | 3        | 4.9        | 1.95E-14  |
| Q9H074-1   | Polyadenylate-binding protein-interacting protein 1        | PAIP1     |          | 1.02     |          |          | 1.02       |      | 3        | 5.8        | 6.43E-06  |
| Q15843     | NEDD8                                                      | NEDD8     | 1.02     |          |          |          | 1.02       |      | 4        | 46         | 1.11E-99  |
| O00764-1   | Pyridoxal kinase                                           | C21orf124 | 1.02     |          |          |          | 1.02       |      | 5        | 28         | 6.52E-78  |
| Q16629-1   | Splicing factor 9G8                                        | SFRS7     | 1.06     | 1.05     | 0.95     | 1.05     | 1.02       | 0.06 | 9        | 34         | 1.40E-79  |
| Q15046-2   | Lysine--tRNA ligase                                        | KARS      | 1        | 1.11     | 0.95     | 1.05     | 1.02       | 0.08 | 22       | 37         | 1.91E-222 |
| Q9NZL4-2   | Heat shock protein-binding protein 1                       | HSPBP     | 1.17     | 1.11     | 0.78     | 1.28     | 1.02       | 0.21 | 11       | 60         | 4.92E-77  |
| Q9UHD1-1   | CHORD domain-containing protein 1                          | CHORDC1   | 1.21     | 1.11     | 0.74     | 1.35     | 1.02       | 0.25 | 11       | 43         | 1.19E-220 |
| P35637-2   | 75 kDa DNA-pairing protein                                 | FUS       | 1.03     | 1.02     | 1.02     | 0.98     | 1.02       | 0.01 | 10       | 25         | 2.74E-115 |

| UniProt ID | Protein_Name                                               | Gene Name   | F1 (L/H) | F2 (L/H) | R1 (H/L) | R1 (L/H) | Mean (T/U) | S.D. | Pep. No. | %Seq. Cov. | PEP       |
|------------|------------------------------------------------------------|-------------|----------|----------|----------|----------|------------|------|----------|------------|-----------|
| O43172-1   | PRP4 homolog                                               | PRP4        | 1.01     | 1.00     | 1.06     | 0.94     | 1.02       | 0.03 | 11       | 26         | 9.02E-91  |
| O95782-1   | 100 kDa coated vesicle protein A                           | ADTA A      | 1.07     | 0.98     | 1.02     | 0.98     | 1.02       | 0.05 | 19       | 28         | 5.84E-124 |
| C9JKU1     | 14KDa protein                                              | PDIA3       | 0.97     | 1.04     | 1.06     | 0.94     | 1.02       | 0.05 | 7        | 51         | 1.74E-164 |
| P13667     | Endoplasmic reticulum resident protein 70                  | ERP70       | 0.97     | 1.04     | 1.06     | 0.94     | 1.02       | 0.05 | 31       | 43         | 8.92E-270 |
| P62993-1   | Adapter protein GRB2                                       | ASH         | 0.98     | 0.95     | 1.14     | 0.88     | 1.02       | 0.10 | 12       | 61         | 4.51E-87  |
| P13489     | Placental ribonuclease inhibitor                           | PRI         | 1.09     | 1.08     | 0.90     | 1.11     | 1.02       | 0.11 | 21       | 70         | 0.00E+00  |
| P25705     | ATP synthase subunit alpha, mitochondrial                  | ATP5A       | 0.96     | 0.96     | 1.15     | 0.87     | 1.02       | 0.11 | 33       | 60         | 0.00E+00  |
| Q66K74     | BPY2-interacting protein 1                                 | BPY2IP 1    | 1.02     | 1.15     | 0.90     | 1.11     | 1.02       | 0.13 | 9        | 15         | 1.87E-44  |
| P15531-2   | Granzyme A-activated DNase                                 | NDPK A      | 1.14     | 1.08     | 0.85     | 1.18     | 1.02       | 0.15 | 11       | 70         | 7.76E-109 |
| Q9H3N1     | Thioredoxin domain-containing protein 1                    | PSEC0085    | 1.13     | 1.17     | 0.77     | 1.30     | 1.02       | 0.22 | 11       | 40         | 6.58E-43  |
| P78316-1   | Nucleolar complex protein 14                               | C4orf9      | 1.21     | 1.09     | 0.77     | 1.30     | 1.02       | 0.23 | 8        | 8.3        | 8.27E-20  |
| Q9UHD9     | Chap1                                                      | HRIHF B2157 | 0.99     | 1.27     | 0.81     | 1.23     | 1.02       | 0.23 | 6        | 17         | 2.65E-88  |
| Q9NR28-1   | Diablo homolog, mitochondrial                              | DIABLO      | 1.01     | 1.02     | 1.04     | 0.96     | 1.02       | 0.02 | 6        | 25         | 4.06E-36  |
| Q5TFE4     | 5-nucleotidase domain-containing protein 1                 | LP2642      | 1.02     | 1.05     | 1.00     | 1.00     | 1.02       | 0.03 | 4        | 10         | 7.14E-81  |
| P25788-1   | Macropain subunit C8                                       | HC8         | 0.99     | 1.03     | 1.05     | 0.95     | 1.02       | 0.03 | 13       | 41         | 1.76E-45  |
| P21281     | Endomembrane proton pump 58 kDa subunit                    | ATP6B 2     | 1.06     | 1.04     | 0.97     | 1.03     | 1.02       | 0.05 | 12       | 38         | 5.80E-139 |
| B4DM45     | cDNA FLJ56465, highly similar to Dynactin-1                | DCTN1       | 0.99     | 1.00     | 1.08     | 0.93     | 1.02       | 0.05 | 28       | 33         | 2.89E-207 |
| P06576     | ATP synthase subunit beta, mitochondrial                   | ATP5B       | 0.98     | 1.01     | 1.08     | 0.93     | 1.02       | 0.05 | 28       | 76         | 0.00E+00  |
| Q9NPA0     | UPF0480 protein C15orf24                                   | C11orf3     | 0.96     | 1.04     | 1.07     | 0.93     | 1.02       | 0.06 | 6        | 34         | 1.35E-11  |
| Q5QJE6     | Deoxynucleotidyltransferase terminal-interacting protein 2 | DNTTI P2    | 1.07     | 1.04     | 0.96     | 1.04     | 1.02       | 0.06 | 8        | 14         | 1.32E-173 |
| O43516-3   | Protein PRPL-2                                             | WASPI P     | 1.06     | 1.06     | 0.95     | 1.05     | 1.02       | 0.06 | 2        | 7.3        | 5.51E-06  |
| Q5SW79-1   | Centrosomal protein of 170 kDa                             | CEP170      | 1.06     | 1.06     | 0.95     | 1.05     | 1.02       | 0.06 | 13       | 12         | 9.52E-84  |
| P30101     | 58 kDa glucose-regulated protein                           | ERP57       | 0.95     | 1.03     | 1.09     | 0.92     | 1.02       | 0.07 | 30       | 55         | 0.00E+00  |
| P35244     | Replication factor A protein 3                             | REPA3       | 1.01     | 0.95     | 1.11     | 0.90     | 1.02       | 0.08 | 3        | 43         | 3.73E-52  |
| P52272-    | Heterogeneous nuclear                                      | HNRNP       | 0.94     | 1.02     | 1.11     | 0.90     | 1.02       | 0.09 | 45       | 64         | 1.42E-193 |

| UniProt ID | Protein_Name                                                                                                            | Gene Name | F1 (L/H) | F2 (L/H) | R1 (H/L) | R1 (L/H) | Mean (T/U) | S.D. | Pep. No. | %Seq. Cov. | PEP       |
|------------|-------------------------------------------------------------------------------------------------------------------------|-----------|----------|----------|----------|----------|------------|------|----------|------------|-----------|
| 1          | ribonucleoprotein M                                                                                                     | M         |          |          |          |          |            |      |          |            |           |
| A8K2W7     | cDNA FLJ78119, highly similar to Homo sapiens G1 to S phase transition 1 (GSPT1), mRNA                                  | GSPT1     | 1.09     | 1.07     | 0.91     | 1.10     | 1.02       | 0.10 | 12       | 21         | 1.37E-79  |
| P09110     | 3-ketoacyl-CoA thiolase, peroxisomal                                                                                    | ACAA      | 1.13     | 1.03     | 0.91     | 1.10     | 1.02       | 0.11 | 8        | 33         | 1.48E-100 |
| O43765     | Small glutamine-rich tetratricopeptide repeat-containing protein alpha                                                  | SGT       | 0.92     | 1.14     | 1.01     | 0.99     | 1.02       | 0.11 | 10       | 36         | 7.03E-89  |
| B2R7C5     | cDNA, FLJ93378, highly similar to Homo sapiens MCM3 minichromosome maintenance deficient 3 (S. cerevisiae) (MCM3), mRNA | hCG_22498 | 0.92     | 0.97     | 1.18     | 0.85     | 1.02       | 0.14 | 39       | 52         | 0.00E+00  |
| Q15018     | Abraxas brother protein 1                                                                                               | ABRO1     | 0.83     | 1.04     | 1.20     | 0.83     | 1.02       | 0.19 | 4        | 15         | 2.71E-44  |
| P30038     | Aldehyde dehydrogenase family 4 member A1                                                                               | ALDH4A1   | 0.84     | 0.99     | 1.24     | 0.81     | 1.02       | 0.20 | 4        | 9.2        | 6.46E-39  |
| P30084     | Enoyl-CoA hydratase 1                                                                                                   | ECHS1     | 0.87     | 0.87     | 1.33     | 0.75     | 1.02       | 0.27 | 9        | 34         | 0.00E+00  |
| P00374     | Dihydrofolate reductase                                                                                                 | DHFR      | 1.24     | 1.17     | 0.66     | 1.52     | 1.02       | 0.32 | 7        | 28         | 8.15E-75  |
| Q8N9M1-1   | Uncharacterized protein C19orf47                                                                                        | C19orf47  |          | 1.04     | 1.01     | 0.99     | 1.03       | 0.02 | 2        | 5.9        | 3.63E-03  |
| P46977     | Dolichyl-diphosphooligosaccharide--protein glycosyltransferase subunit STT3A                                            | ITM1      |          | 1.09     | 0.96     | 1.04     | 1.03       | 0.09 | 4        | 5          | 9.73E-05  |
| Q9BRJ7-1   | NUDT16-like protein 1                                                                                                   | NUDT16L1  | 1.11     |          | 0.94     | 1.06     | 1.03       | 0.12 | 2        | 13         | 1.17E-37  |
| Q96DC7-2   | Transmembrane and coiled-coil domain-containing protein 6                                                               | PRO1580   |          | 1.15     | 0.90     | 1.11     | 1.03       | 0.18 | 2        | 7.8        | 5.12E-08  |
| Q58FF8     | Heat shock protein 90-beta b                                                                                            | HSP90AB2P | 1.15     |          | 0.90     | 1.11     | 1.03       | 0.18 | 17       | 26         | 4.05E-183 |
| O43464-1   | High temperature requirement protein A2                                                                                 | HTRA2     | 1.16     |          | 0.89     | 1.12     | 1.03       | 0.19 | 2        | 5.2        | 4.83E-14  |
| P61962     | DDB1- and CUL4-associated factor 7                                                                                      | DCAF7     | 1.02     | 1.03     | 1.03     | 0.97     | 1.03       | 0.01 | 4        | 16         | 4.23E-35  |
| P13010     | 86 kDa subunit of Ku antigen                                                                                            | G22P2     | 1.00     | 1.03     | 1.05     | 0.95     | 1.03       | 0.03 | 48       | 70         | 0.00E+00  |
| Q01780-1   | Autoantigen PM/Scl 2                                                                                                    | EXOSC10   | 1.03     | 1.05     | 1.00     | 1.00     | 1.03       | 0.03 | 23       | 32         | 6.78E-90  |
| B9EGQ8     | SMARCA4 protein                                                                                                         | SMARCA4   | 1.01     | 1.01     | 1.06     | 0.94     | 1.03       | 0.03 | 27       | 21         | 8.37E-302 |
| P23246-    | 100 kDa DNA-pairing                                                                                                     | PSF       | 1.03     | 0.99     | 1.06     | 0.94     | 1.03       | 0.04 | 35       | 49         | 0.00E+00  |

| UniProt ID | Protein_Name                                                              | Gene Name | F1 (L/H) | F2 (L/H) | R1 (H/L) | R1 (L/H) | Mean (T/U) | S.D. | Pep. No. | %Seq. Cov. | PEP       |
|------------|---------------------------------------------------------------------------|-----------|----------|----------|----------|----------|------------|------|----------|------------|-----------|
| 1          | protein                                                                   |           |          |          |          |          |            |      |          |            |           |
| O75934     | Breast carcinoma-amplified sequence 2                                     | BCAS2     | 0.99     | 1.06     | 1.03     | 0.97     | 1.03       | 0.04 | 10       | 50         | 3.19E-89  |
| Q14151     | Scaffold attachment factor B2                                             | KIAA0138  | 1.04     | 0.98     | 1.06     | 0.94     | 1.03       | 0.04 | 22       | 27         | 1.77E-104 |
| B2R7M3     | cDNA, FLJ93510, highly similar to Homo sapiens JTV1 gene (JTV1), mRNA     | AIMP2     | 1.04     | 1.06     | 0.98     | 1.02     | 1.03       | 0.04 | 8        | 35         | 1.91E-100 |
| Q9NQ88     | Probable fructose-2,6-bisphosphatase TIGAR                                | C12orf5   | 1.00     | 1.08     | 1.00     | 1.00     | 1.03       | 0.05 | 8        | 44         | 1.13E-73  |
| P45880-1   | Outer mitochondrial membrane protein porin 2                              | VDAC2     | 0.97     | 1.05     | 1.06     | 0.94     | 1.03       | 0.05 | 10       | 44         | 1.51E-85  |
| P60763     | p21-Rac3                                                                  | RAC3      | 0.99     | 0.99     | 1.10     | 0.91     | 1.03       | 0.06 | 9        | 38         | 1.85E-128 |
| P09012     | U1 small nuclear ribonucleoprotein A                                      | SNRPA     | 0.96     | 1.01     | 1.11     | 0.90     | 1.03       | 0.08 | 8        | 30         | 1.84E-19  |
| Q7Z2Z2-1   | Elongation factor Tu GTP-binding domain-containing protein 1              | EFTUD1    | 1.12     | 1.00     | 0.96     | 1.04     | 1.03       | 0.08 | 6        | 8.5        | 1.02E-68  |
| Q9Y2X3     | Nucleolar protein 5                                                       | HSPC120   | 1.08     | 1.08     | 0.92     | 1.09     | 1.03       | 0.09 | 16       | 38         | 5.85E-225 |
| Q13442     | 28 kDa heat- and acid-stable phosphoprotein                               | HASPP28   | 1.00     | 1.13     | 0.95     | 1.05     | 1.03       | 0.09 | 8        | 43         | 7.73E-34  |
| Q96CS3     | FAS-associated factor 2                                                   | ETEA      | 0.93     | 1.12     | 1.03     | 0.97     | 1.03       | 0.10 | 6        | 16         | 4.48E-12  |
| P33993-1   | CDC47 homolog                                                             | CDC47     | 0.97     | 0.97     | 1.14     | 0.88     | 1.03       | 0.10 | 39       | 60         | 0.00E+00  |
| Q8TC12-1   | Androgen-regulated short-chain dehydrogenase/reductase 1                  | ARSDR1    | 1.03     | 1.13     | 0.92     | 1.09     | 1.03       | 0.11 | 3        | 13         | 1.53E-57  |
| Q14498-1   | Hepatocellular carcinoma protein 1                                        | HCC1      | 0.96     | 0.97     | 1.15     | 0.87     | 1.03       | 0.11 | 12       | 27         | 1.53E-167 |
| P25685     | DnaJ homolog subfamily B member 1                                         | DNAJ1     | 1.06     | 1.12     | 0.90     | 1.11     | 1.03       | 0.11 | 15       | 47         | 1.41E-156 |
| Q08257     | NADPH:quinone reductase                                                   | CRYZ      | 0.90     | 1.06     | 1.12     | 0.89     | 1.03       | 0.11 | 8        | 32         | 4.23E-65  |
| Q12962     | Transcription initiation factor TFIID 30 kDa subunit                      | TAF10     | 1.16     | 1.01     | 0.91     | 1.10     | 1.03       | 0.13 | 3        | 19         | 1.90E-125 |
| O00442-2   | RNA 3-terminal phosphate cyclase                                          | RPC       | 0.99     | 0.92     | 1.17     | 0.85     | 1.03       | 0.13 | 4        | 14         | 1.80E-42  |
| B4DIK2     | cDNA FLJ60565, highly similar to Nuclear pore complex protein Nup153      | NUP153    | 1.13     | 1.07     | 0.88     | 1.14     | 1.03       | 0.13 | 10       | 11         | 1.33E-117 |
| Q16881-1   | Gene associated with retinoic and interferon-induced mortality 12 protein | GRIM12    | 1.03     | 0.89     | 1.16     | 0.86     | 1.03       | 0.14 | 21       | 47         | 1.73E-187 |
| P61221     | 2-5-oligoadenylate-binding protein                                        | ABCE1     | 1.09     | 1.12     | 0.87     | 1.15     | 1.03       | 0.14 | 19       | 41         | 1.06E-241 |

| UniProt ID | Protein_Name                                                     | Gene Name | F1 (L/H) | F2 (L/H) | R1 (H/L) | R1 (L/H) | Mean (T/U) | S.D. | Pep. No. | %Seq. Cov. | PEP       |
|------------|------------------------------------------------------------------|-----------|----------|----------|----------|----------|------------|------|----------|------------|-----------|
| P24941     | Cell division protein kinase 2                                   | CDK2      | 0.88     | 1.19     | 1.01     | 0.99     | 1.03       | 0.16 | 6        | 30         | 4.01E-26  |
| Q9UJA5-1   | tRNA (adenine-N(1)-methyltransferase non-catalytic subunit TRM6  | CGI-09    | 1.18     | 1.06     | 0.84     | 1.19     | 1.03       | 0.17 | 7        | 14         | 1.80E-59  |
| Q9NQZ2     | Charged amino acid-rich leucine zipper 1                         | CRLZ1     | 1.11     | 1.16     | 0.81     | 1.23     | 1.03       | 0.19 | 7        | 22         | 2.11E-67  |
| O60231     | ATP-dependent RNA helicase #3                                    | DBP2      | 1.21     | 1.05     | 0.82     | 1.22     | 1.03       | 0.20 | 12       | 15         | 3.64E-78  |
| O75554     | Formin-binding protein 21                                        | FBP21     | 1.17     | 0.78     | 1.13     | 0.88     | 1.03       | 0.21 | 4        | 10         | 3.66E-15  |
| P00813     | Adenosine aminohydrolase                                         | ADA       | 1.16     | 1.18     | 0.74     | 1.35     | 1.03       | 0.25 | 29       | 78         | 0.00E+00  |
| P42574     | Caspase-3                                                        | CASP3     | 0.90     | 0.85     | 1.33     | 0.75     | 1.03       | 0.26 | 5        | 17         | 4.21E-72  |
| Q16891-1   | Cell proliferation-inducing gene 4/52 protein                    | HMP       | 0.86     | 0.84     | 1.38     | 0.72     | 1.03       | 0.31 | 31       | 43         | 1.77E-200 |
| P61201-2   | Alien homolog                                                    | COPS2     | 0.78     | 0.89     | 1.41     | 0.71     | 1.03       | 0.34 | 4        | 11         | 2.93E-09  |
| P48735     | ICD-M                                                            | IDH2      | 0.66     | 0.68     | 1.74     | 0.57     | 1.03       | 0.62 | 22       | 51         | 4.98E-280 |
| Q5JRX3-1   | Pitriylsin metalloproteinase 1                                   | KIAA1104  | 1.08     | 1.11     | 0.89     | 1.12     | 1.03       | 0.12 | 12       | 18         | 1.85E-72  |
| O14776-1   | TATA box-binding protein-associated factor 2S                    | CA150     | 1.08     | 1.11     | 0.89     | 1.12     | 1.03       | 0.12 | 20       | 20         | 3.43E-75  |
| Q96AT1     | Uncharacterized protein KIAA1143                                 | KIAA1143  |          | 1.03     | 1.03     | 0.97     | 1.03       | 0.00 | 6        | 36         | 4.71E-18  |
| Q8TBE9     | Haloacid dehalogenase-like hydrolase domain-containing protein 4 | C20orf147 |          | 1.04     | 1.02     | 0.98     | 1.03       | 0.01 | 4        | 12         | 1.83E-86  |
| P10599     | ATL-derived factor                                               | TRDX      | 1.00     | 1.04     | 1.05     | 0.95     | 1.03       | 0.03 | 8        | 51         | 1.68E-70  |
| P35268     | 60S ribosomal protein L22                                        | RPL22     | 1.03     | 1.07     | 0.99     | 1.01     | 1.03       | 0.04 | 4        | 51         | 1.76E-214 |
| P11021     | 78 kDa glucose-regulated protein                                 | GRP78     | 1.03     | 1.07     | 0.99     | 1.01     | 1.03       | 0.04 | 36       | 49         | 0.00E+00  |
| Q9NP77-1   | RNA polymerase II subunit A C-terminal domain phosphatase SSU72  | HSPC182   | 1.00     | 1.00     | 1.09     | 0.92     | 1.03       | 0.05 | 6        | 35         | 1.45E-30  |
| Q08378-1   | Golgi complex-associated protein of 170 kDa                      | GOLGA3    | 1.01     | 1.09     | 0.99     | 1.01     | 1.03       | 0.05 | 12       | 8.5        | 9.23E-45  |
| P52292     | Importin subunit alpha-2                                         | KPNA2     | 1.09     | 1.02     | 0.98     | 1.02     | 1.03       | 0.06 | 20       | 57         | 0.00E+00  |
| Q5VWZ2-1   | Lysophospholipase-like protein 1                                 | LYPLA1    | 1.07     | 0.99     |          |          | 1.03       | 0.06 | 2        | 16         | 1.21E-12  |
| P24752     | Acetoacetyl-CoA thiolase                                         | ACAT      | 0.97     | 1.03     | 1.09     | 0.92     | 1.03       | 0.06 | 12       | 44         | 4.39E-253 |
| O00233-1   | 26S proteasome non-ATPase regulatory subunit 9                   | PSMD9     | 0.96     | 1.07     | 1.06     | 0.94     | 1.03       | 0.06 | 10       | 51         | 1.89E-50  |

| UniProt ID | Protein_Name                                                                                                                                      | Gene Name | F1 (L/H) | F2 (L/H) | R1 (H/L) | R1 (L/H) | Mean (T/U) | S.D. | Pep. No. | %Seq. Cov. | PEP       |
|------------|---------------------------------------------------------------------------------------------------------------------------------------------------|-----------|----------|----------|----------|----------|------------|------|----------|------------|-----------|
| P06733-1   | 2-phospho-D-glycerate hydro-lyase                                                                                                                 | ENO1      | 1.07     | 1.06     | 0.96     | 1.04     | 1.03       | 0.06 | 35       | 77         | 0.00E+00  |
| Q99426     | Cytoskeleton-associated protein 1                                                                                                                 | CG22      | 0.96     | 1.04     | 1.09     | 0.92     | 1.03       | 0.07 | 10       | 49         | 1.24E-169 |
| O00567     | Nucleolar protein 56                                                                                                                              | NOL5A     | 1.07     | 1.07     | 0.95     | 1.05     | 1.03       | 0.07 | 21       | 43         | 2.18E-190 |
| O95639-1   | Cleavage and polyadenylation specificity factor 30 kDa subunit                                                                                    | CPSF30    | 0.98     |          | 1.08     | 0.93     | 1.03       | 0.07 | 3        | 12         | 2.16E-21  |
| Q15020-1   | Squamous cell carcinoma antigen recognized by T-cells 3                                                                                           | KIAA0156  | 1.01     | 0.97     | 1.11     | 0.90     | 1.03       | 0.07 | 16       | 22         | 9.41E-214 |
| P21926     | 5H9 antigen                                                                                                                                       | CD9       | 1.09     |          | 0.97     | 1.03     | 1.03       | 0.08 | 2        | 15         | 1.75E-58  |
| P46060     | Ran GTPase-activating protein 1                                                                                                                   | KIAA1835  | 1.00     | 0.96     | 1.13     | 0.88     | 1.03       | 0.09 | 20       | 43         | 0.00E+00  |
| P35580-3   | Cellular myosin heavy chain, type B                                                                                                               | MYH10     | 0.95     | 1.01     | 1.13     | 0.88     | 1.03       | 0.09 | 83       | 45         | 0.00E+00  |
| P17987     | CCT-alpha                                                                                                                                         | CCT1      | 1.09     | 1.08     | 0.92     | 1.09     | 1.03       | 0.10 | 32       | 69         | 0.00E+00  |
| Q9Y3B8-1   | Oligoribonuclease, mitochondrial                                                                                                                  | CGI-114   | 0.94     | 1.00     | 1.15     | 0.87     | 1.03       | 0.11 | 6        | 19         | 3.51E-13  |
| Q15029     | 116 kDa U5 small nuclear ribonucleoprotein component                                                                                              | EFTUD2    | 1.13     | 1.05     | 0.91     | 1.10     | 1.03       | 0.11 | 36       | 48         | 0.00E+00  |
| P61077-2   | Ubiquitin carrier protein D3                                                                                                                      | UBCH5C    | 1.11     | 0.95     |          |          | 1.03       | 0.11 | 2        | 14         | 1.97E-04  |
| Q8IZ83-1   | Aldehyde dehydrogenase family 16 member A1                                                                                                        | ALDH16A1  | 1.15     | 1.03     | 0.91     | 1.10     | 1.03       | 0.12 | 9        | 16         | 7.11E-75  |
| Q9BY77-1   | 46 kDa DNA polymerase delta interaction protein                                                                                                   | KIAA1649  | 1        | 0.92     | 1.17     | 0.85     | 1.03       | 0.13 | 11       | 40         | 1.28E-67  |
| P68363     | Alpha-tubulin ubiquitous                                                                                                                          | TUBA1B    | 0.96     | 0.95     | 1.18     | 0.85     | 1.03       | 0.13 | 33       | 76         | 0.00E+00  |
| P58546     | Myotrophin                                                                                                                                        | MTPN      | 0.90     | 1.03     | 1.16     | 0.86     | 1.03       | 0.13 | 7        | 74         | 3.50E-107 |
| B3KWV6     | cDNA FLJ43948 fis, clone TESTI4014924, highly similar to Homo sapiens cytoplasmic FMR1 interacting protein 1 (CYFIP1), transcript variant 1, mRNA | CYFIP1    | 0.91     | 1.17     | 1.01     | 0.99     | 1.03       | 0.13 | 6        | 5.2        | 1.50E-14  |
| P00367     | Glutamate dehydrogenase 1, mitochondrial                                                                                                          | GLUD      | 0.89     | 1.01     | 1.19     | 0.84     | 1.03       | 0.15 | 16       | 31         | 1.47E-78  |
| Q9NY93     | ATP-dependent 61 kDa nucleolar RNA helicase                                                                                                       | DDX56     | 1.14     | 1.10     | 0.85     | 1.18     | 1.03       | 0.16 | 6        | 15         | 1.36E-57  |
| P36969-1   | Glutathione peroxidase 4                                                                                                                          | GPX4      | 0.84     | 1.13     | 1.12     | 0.89     | 1.03       | 0.16 | 3        | 9.8        | 1.71E-04  |
| B4E1S7     | cDNA FLJ61202,                                                                                                                                    | AIMP1     | 1.10     | 1.16     | 0.83     | 1.20     | 1.03       | 0.18 | 12       | 50         | 1.88E-87  |

| UniProt ID | Protein_Name                                                      | Gene Name        | F1 (L/H) | F2 (L/H) | R1 (H/L) | R1 (L/H) | Mean (T/U) | S.D. | Pep. No. | %Seq. Cov. | PEP       |
|------------|-------------------------------------------------------------------|------------------|----------|----------|----------|----------|------------|------|----------|------------|-----------|
|            | highly similar to Multisynthetase complex auxiliary component p43 |                  |          |          |          |          |            |      |          |            |           |
| Q9H9H4     | ESCRT-I complex subunit VPS37B                                    | VPS37B           | 1.17     |          | 0.89     | 1.12     | 1.03       | 0.20 | 5        | 20         | 6.63E-38  |
| Q9Y2S7     | 38 kDa DNA polymerase delta interaction protein                   | HSPC017          | 1.19     | 1.12     | 0.78     | 1.28     | 1.03       | 0.22 | 11       | 40         | 4.92E-83  |
| O60841     | Eukaryotic translation initiation factor 5B                       | EIF5B            | 1.10     | 1.23     | 0.76     | 1.32     | 1.03       | 0.24 | 31       | 32         | 6.29E-299 |
| Q9NZB2-6   | Constitutive coactivator of PPAR-gamma-like protein 1             | C9orf10          | 1.15     | 1.19     | 0.75     | 1.33     | 1.03       | 0.24 | 17       | 20         | 2.06E-170 |
| P48506     | Gamma-ECS                                                         | GCLC             |          | 1.22     | 0.84     | 1.19     | 1.03       | 0.27 | 6        | 11         | 2.68E-40  |
| O75607     | Nucleoplasmin-3                                                   | NPM3             | 1.45     |          | 0.61     | 1.64     | 1.03       | 0.59 | 3        | 32         | 2.36E-73  |
| Q9UPW0-1   | Forkhead box protein J3                                           | FOXJ3            |          |          | 1.03     | 0.97     | 1.03       |      | 2        | 4.7        | 2.09E-20  |
| O60942-1   | GTP--RNA guanylyltransferase                                      | CAP1A            |          | 1.03     |          |          | 1.03       |      | 2        | 3.4        | 1.64E-05  |
| B4DX69     | cDNA FLJ55158, highly similar to Thioredoxin, mitochondrial       | TRX2             | 1.03     |          |          |          | 1.03       |      | 2        | 18         | 1.47E-04  |
| P53602     | Diphosphomevalonate decarboxylase                                 | MPD              |          | 1.03     |          |          | 1.03       |      | 2        | 5.8        | 4.72E-19  |
| Q5VW32     | BRO1 domain-containing protein BROX                               | BROFT1           |          | 1.03     |          |          | 1.03       |      | 2        | 6.1        | 1.22E-08  |
| P78356-1   | 1-phosphatidylinositol-5-phosphate 4-kinase 2-beta                | PIP4K2B          |          | 1.03     |          |          | 1.03       |      | 2        | 6.7        | 4.54E-06  |
| B0QY29     | Family with sequence similarity 118, member A                     | CTA-268H5.11-003 | 1.03     |          |          |          | 1.03       |      | 2        | 19         | 3.38E-118 |
| Q9NWU2     | Protein C20orf11                                                  | C20orf11         | 1.03     |          |          |          | 1.03       |      | 3        | 25         | 1.95E-26  |
| A4UCT1     | Glyceraldehyde-3-phosphate dehydrogenase                          | GAPD             |          | 1.03     |          |          | 1.03       |      | 11       | 33         | 1.45E-144 |
| P84090     | Enhancer of rudimentary homolog                                   | ERH              | 1.04     | 1.05     | 1.01     | 0.99     | 1.03       | 0.02 | 7        | 46         | 1.68E-201 |
| Q9BUQ0     | Polypyrimidine tract binding protein 1                            | hCG_20560        | 1.05     | 0.96     | 1.09     | 0.92     | 1.03       | 0.07 | 20       | 54         | 0.00E+00  |
| Q9NXR7-1   | Brain and reproductive organ-expressed protein                    | BRCC45           | 0.98     | 1.11     | 1.01     | 0.99     | 1.03       | 0.07 | 3        | 8.2        | 7.85E-06  |
| Q00688     | 25 kDa FK506-binding protein                                      | FKBP25           | 1.01     | 1.14     | 0.95     | 1.05     | 1.03       | 0.10 | 11       | 53         | 1.25E-145 |
| Q9Y6B6     | GTP-binding protein SAR1b                                         | SAR1B            | 1.16     | 0.94     | 1.00     | 1.00     | 1.03       | 0.11 | 6        | 40         | 7.82E-64  |
| Q9BV8      | Methyltransferase-like                                            | AD-003           | 0.95     | 0.96     | 1.19     | 0.84     | 1.03       | 0.14 | 5        | 24         | 1.86E-36  |

| UniProt ID | Protein_Name                                                                    | Gene Name | F1 (L/H) | F2 (L/H) | R1 (H/L) | R1 (L/H) | Mean (T/U) | S.D. | Pep. No. | %Seq. Cov. | PEP       |
|------------|---------------------------------------------------------------------------------|-----------|----------|----------|----------|----------|------------|------|----------|------------|-----------|
| 6          | protein 11A                                                                     |           |          |          |          |          |            |      |          |            |           |
| Q92616     | GCN1-like protein 1                                                             | GCN1L1    | 1.15     | 1.17     | 0.78     | 1.28     | 1.03       | 0.22 | 32       | 18         | 0.00E+00  |
| Q1KMD3     | Heterogeneous nuclear ribonucleoprotein U-like protein 2                        | HNRNPUL2  | 0.84     | 0.94     | 1.32     | 0.76     | 1.03       | 0.25 | 21       | 30         | 1.06E-151 |
| P63241-2   | eIF-4D                                                                          | EIF5A     | 1.14     | 1.24     | 0.72     | 1.39     | 1.03       | 0.28 | 10       | 60         | 0.00E+00  |
| P05387     | 60S acidic ribosomal protein P2                                                 | D11S2243E | 1.12     | 1.26     | 0.72     | 1.39     | 1.03       | 0.28 | 9        | 74         | 4.95E-235 |
| P16615-1   | Calcium pump 2                                                                  | ATP2A2    | 1.07     | 1.04     | 0.99     | 1.01     | 1.03       | 0.04 | 13       | 18         | 2.08E-182 |
| P14866     | Heterogeneous nuclear ribonucleoprotein L                                       | HNRNP L   | 1.00     | 1.02     | 1.08     | 0.93     | 1.03       | 0.04 | 24       | 59         | 0.00E+00  |
| Q96P16-1   | Cyclin-dependent kinase inhibitor 2B-related protein                            | P15RS     | 1.06     | 0.97     | 1.07     | 0.93     | 1.03       | 0.06 | 8        | 38         | 3.01E-48  |
| Q9UJY5-1   | ADP-ribosylation factor-binding protein GGA1                                    | GGA1      | 0.98     | 1.02     | 1.1      | 0.91     | 1.03       | 0.06 | 6        | 13         | 3.94E-43  |
| Q9Y676     | 28S ribosomal protein S18-2, mitochondrial                                      | C6orf14   | 1.06     | 0.96     | 1.08     | 0.93     | 1.03       | 0.06 | 5        | 30         | 2.62E-33  |
| Q15006     | Tetratricopeptide repeat protein 35                                             | KIAA0103  | 1.07     | 1.08     | 0.95     | 1.05     | 1.03       | 0.07 | 7        | 31         | 2.28E-131 |
| Q6P6C2-1   | Alkylated DNA repair protein alkB homolog 5                                     | ABH5      | 1.09     | 1.08     | 0.93     | 1.08     | 1.03       | 0.09 | 4        | 14         | 4.32E-43  |
| O94913     | Pre-mRNA cleavage complex 2 protein Pcf11                                       | KIAA0824  | 1.07     | 1.10     | 0.93     | 1.08     | 1.03       | 0.09 | 6        | 4.6        | 2.32E-36  |
| Q9H3P2-7   | Negative elongation factor A                                                    | NELFA     | 1.11     | 1.07     | 0.92     | 1.09     | 1.03       | 0.10 | 6        | 18         | 5.48E-82  |
| B3KT15     | 26S proteasome non-ATPase regulatory subunit 13                                 | PSMD13    | 1.13     | 1.07     | 0.9      | 1.11     | 1.03       | 0.12 | 17       | 49         | 3.40E-255 |
| Q02790     | 51 kDa FK506-binding protein                                                    | FKBP4     | 1.15     | 1.10     | 0.85     | 1.18     | 1.03       | 0.16 | 26       | 67         | 6.82E-281 |
| O43681     | Arsenical pump-driving ATPase                                                   | ARSA      | 1.18     | 1.07     | 0.85     | 1.18     | 1.03       | 0.17 | 10       | 37         | 1.61E-71  |
| Q9Y5B0-1   | RNA polymerase II subunit A C-terminal domain phosphatase                       | CTDP1     | 1.15     | 1.12     | 0.83     | 1.20     | 1.03       | 0.18 | 5        | 8.1        | 4.09E-45  |
| Q8N6M0     | DUBA-5                                                                          | CGI-77    | 1.09     | 1.18     | 0.83     | 1.20     | 1.03       | 0.18 | 5        | 26         | 1.01E-64  |
| P21399     | Citrate hydro-lyase                                                             | ACO1      | 0.92     | 0.91     | 1.27     | 0.79     | 1.03       | 0.21 | 9        | 16         | 8.02E-68  |
| Q13200     | 26S proteasome non-ATPase regulatory subunit 2                                  | PSMD2     | 1.15     | 1.18     | 0.77     | 1.30     | 1.03       | 0.23 | 28       | 39         | 6.67E-300 |
| A8K976     | cDNA FLJ76685, highly similar to Homo sapiens WD repeat domain 37 (WDR37), mRNA | KIAA0982  |          | 1.17     | 0.90     | 1.11     | 1.04       | 0.19 | 2        | 4.4        | 6.11E-05  |



| UniProt ID | Protein_Name                                                    | Gene Name         | F1 (L/H) | F2 (L/H) | R1 (H/L) | R1 (L/H) | Mean (T/U) | S.D. | Pep. No. | %Seq. Cov. | PEP       |
|------------|-----------------------------------------------------------------|-------------------|----------|----------|----------|----------|------------|------|----------|------------|-----------|
| P14649     | Myosin light chain 1 slow-twitch muscle A isoform               | MLC1S A           | 0.86     |          | 1.21     | 0.83     | 1.04       | 0.25 | 9        | 50         | 4.02E-63  |
| P13598     | Intercellular adhesion molecule 2                               | ICAM2             | 0.83     |          | 1.24     | 0.81     | 1.04       | 0.29 | 2        | 11         | 8.83E-30  |
| Q7Z2T5-1   | TRM1-like protein                                               | C1orf25           | 1.24     |          | 0.83     | 1.20     | 1.04       | 0.29 | 4        | 11         | 1.44E-110 |
| Q9NYB9-1   | Abelson interactor 2                                            | ABI2              |          | 1.03     | 1.04     | 0.96     | 1.04       | 0.01 | 4        | 11         | 7.01E-30  |
| B4DQN9     | cDNA FLJ50617, highly similar to Tubulin beta-7 chain           | DAAP-285E11.4-003 | 1.03     |          | 1.04     | 0.96     | 1.04       | 0.01 | 25       | 74         | 0.00E+00  |
| Q9NVV4-2   | PAP-associated domain-containing protein 1                      | MTPAP             | 1.09     | 0.98     |          |          | 1.04       | 0.08 | 4        | 9          | 2.06E-25  |
| Q9Y3C6     | Peptidyl-prolyl cis-trans isomerase-like 1                      | CGI-124           | 0.95     | 1.12     |          |          | 1.04       | 0.12 | 4        | 29         | 1.98E-46  |
| P62633-1   | Zinc finger protein 9                                           | CNBP              |          | 1.28     | 0.79     | 1.27     | 1.04       | 0.35 | 9        | 45         | 4.45E-200 |
| Q8IWJ2-2   | CLL-associated antigen KW-11                                    | GCC2              | 0.76     | 1.31     |          |          | 1.04       | 0.39 | 9        | 5.3        | 2.72E-30  |
| P62140     | Serine/threonine-protein phosphatase PP1-beta catalytic subunit | PPP1C B           | 1.14     | 1.00     | 0.97     | 1.03     | 1.04       | 0.09 | 14       | 49         | 0.00E+00  |
| Q15427     | Pre-mRNA-splicing factor SF3b 49 kDa subunit                    | SAP49             | 1.00     | 1.05     | 1.06     | 0.94     | 1.04       | 0.03 | 5        | 21         | 6.37E-166 |
| Q04726-1   | Enhancer of split groucho-like protein 3                        | KIAA1547          | 1.09     | 1.00     | 1.02     | 0.98     | 1.04       | 0.05 | 5        | 8.2        | 6.73E-25  |
| P38159     | Glycoprotein p43                                                | HNRPG             | 0.98     | 1.00     | 1.13     | 0.88     | 1.04       | 0.08 | 21       | 44         | 1.13E-136 |
| Q9NWV8-1   | BRCA1-A complex subunit MERIT40                                 | C19orf62          | 1.13     | 1.00     | 0.98     | 1.02     | 1.04       | 0.08 | 3        | 12         | 2.10E-130 |
| Q99496     | E3 ubiquitin-protein ligase RING2                               | RNF2              | 1.09     | 1.08     | 0.94     | 1.06     | 1.04       | 0.08 | 4        | 15         | 2.63E-14  |
| O94776     | Metastasis-associated 1-like 1                                  | MTA1L1            | 0.97     | 0.99     | 1.15     | 0.87     | 1.04       | 0.10 | 24       | 37         | 2.66E-215 |
| P11216     | Glycogen phosphorylase, brain form                              | PYGB              | 0.94     | 1.03     | 1.14     | 0.88     | 1.04       | 0.10 | 11       | 18         | 3.78E-110 |
| P62495     | Eukaryotic peptide chain release factor subunit 1               | ERF1              | 1.08     | 1.13     | 0.90     | 1.11     | 1.04       | 0.12 | 10       | 27         | 8.49E-71  |
| Q8NF91-1   | Enaptin                                                         | C6orf98           | 0.92     | 1.00     | 1.19     | 0.84     | 1.04       | 0.14 | 3        | 0.5        | 1.01E-59  |
| Q4G0F5     | Vacuolar protein sorting-associated protein 26B                 | VPS26 B           | 0.94     | 0.96     | 1.21     | 0.83     | 1.04       | 0.15 | 2        | 6.8        | 1.41E-09  |
| P07686     | Beta-hexosaminidase subunit beta                                | HCC7              | 0.91     | 0.99     | 1.21     | 0.83     | 1.04       | 0.16 | 10       | 23         | 3.51E-48  |
| Q9HAV7     | GrpE protein homolog 1, mitochondrial                           | GREPEL1           | 1.14     | 1.16     | 0.81     | 1.23     | 1.04       | 0.20 | 10       | 54         | 5.05E-105 |
| P0C0S8     | Histone H2A type 1                                              | H2AFC             | 0.89     | 0.84     | 1.38     | 0.72     | 1.04       | 0.30 | 13       | 66         | 0.00E+00  |

| UniProt ID | Protein_Name                                                            | Gene Name | F1 (L/H) | F2 (L/H) | R1 (H/L) | R1 (L/H) | Mean (T/U) | S.D. | Pep. No. | %Seq. Cov. | PEP       |
|------------|-------------------------------------------------------------------------|-----------|----------|----------|----------|----------|------------|------|----------|------------|-----------|
| P40222     | Alpha-taxilin                                                           | TXLN      | 1.21     | 1.23     | 0.67     | 1.49     | 1.04       | 0.32 | 6        | 18         | 3.35E-55  |
| Q9NV56     | MRG-binding protein                                                     | C20orf20  | 1.20     | 1.24     | 0.67     | 1.49     | 1.04       | 0.32 | 2        | 14         | 5.15E-119 |
| C9JQC3     | Small nuclear ribonucleoprotein Sm D3                                   | SNRPD3    | 1.03     | 1.04     | 1.04     | 0.96     | 1.04       | 0.01 | 4        | 24         | 1.79E-105 |
| Q14974     | Importin subunit beta-1                                                 | KPNB1     | 1.03     | 1.03     | 1.05     | 0.95     | 1.04       | 0.01 | 34       | 47         | 0.00E+00  |
| P00505     | Aspartate aminotransferase, mitochondrial                               | GOT2      | 1.02     | 1.09     | 1.00     | 1.00     | 1.04       | 0.05 | 15       | 41         | 6.83E-200 |
| Q9UIG0-1   | Bromodomain adjacent to zinc finger domain protein 1B                   | BAZ1B     | 1.04     | 1.11     | 0.96     | 1.04     | 1.04       | 0.08 | 27       | 25         | 6.02E-154 |
| O43823     | A-kinase anchor protein 8                                               | AKAP8     | 1.02     | 0.91     | 1.18     | 0.85     | 1.04       | 0.14 | 6        | 14         | 1.29E-43  |
| O76031     | ATP-dependent Clp protease ATP-binding subunit clpX-like, mitochondrial | CLPX      | 1.12     | 1.12     | 0.87     | 1.15     | 1.04       | 0.14 | 10       | 16         | 6.02E-67  |
| Q14558     | 39 kDa phosphoribosylpyrophosphate synthase-associated protein          | PRPSA1    | 1.00     | 0.78     | 1.33     | 0.75     | 1.04       | 0.28 | 6        | 24         | 1.33E-147 |
| Q9NR30-1   | DEAD box protein 21                                                     | DDX21     | 1.25     | 1.16     | 0.70     | 1.43     | 1.04       | 0.30 | 24       | 41         | 1.03E-193 |
| Q6NXT1-1   | Ankyrin repeat domain-containing protein 54                             | ANKRD54   | 0.68     | 1.37     | 1.06     | 0.94     | 1.04       | 0.35 | 5        | 34         | 9.57E-23  |
| A2A274     | Aconitase 2, mitochondrial                                              | ACO2      | 0.74     | 0.78     | 1.59     | 0.63     | 1.04       | 0.48 | 20       | 31         | 5.19E-229 |
| Q9BTE7     | DCN1-like protein 5                                                     | DCUN1D5   | 1.21     | 0.97     | 0.94     | 1.06     | 1.04       | 0.15 | 4        | 27         | 9.77E-19  |
| P37108     | 18 kDa Alu RNA-binding protein                                          | SRP14     | 1.15     | 1.13     | 0.84     | 1.19     | 1.04       | 0.17 | 8        | 47         | 7.07E-111 |
| Q9UKD2     | mRNA turnover protein 4 homolog                                         | C1orf33   | 1.07     | 1.23     | 0.82     | 1.22     | 1.04       | 0.21 | 10       | 40         | 4.09E-51  |
| Q7Z6E9-1   | p53-associated cellular protein of testis                               | My038     | 1.03     |          | 1.05     | 0.95     | 1.04       | 0.01 | 3        | 3.1        | 1.14E-07  |
| Q8WVC0-1   | Replicative senescence down-regulated leo1-like protein                 | LEO1      | 1.03     |          | 1.05     | 0.95     | 1.04       | 0.01 | 5        | 6.2        | 3.80E-31  |
| P61970     | Nuclear transport factor 2                                              | NTF2      | 1.05     | 1.02     | 1.05     | 0.95     | 1.04       | 0.02 | 4        | 50         | 3.67E-18  |
| B2ZZ91     | Golgin B1                                                               | GOLGB1    | 1.02     |          | 1.06     | 0.94     | 1.04       | 0.03 | 11       | 5.5        | 1.51E-46  |
| P23919     | Thymidylate kinase                                                      | CDC8      | 1.01     | 1.08     | 1.03     | 0.97     | 1.04       | 0.04 | 11       | 44         | 2.59E-37  |
| A7MAP0     | Coronin-1C_i2 protein                                                   | CORO1C    | 1.03     | 1.08     | 1.01     | 0.99     | 1.04       | 0.04 | 12       | 27         | 5.40E-101 |
| Q9NVT9     | Armadillo repeat-containing protein 1                                   | ARCP      | 1.10     | 1.02     | 1.00     | 1.00     | 1.04       | 0.05 | 3        | 22         | 2.12E-21  |
| Q96B26     | Exosome complex exonuclease RRP43                                       | EXOSC8    | 1.10     | 1.07     | 0.95     | 1.05     | 1.04       | 0.08 | 4        | 23         | 2.17E-29  |

| UniProt ID | Protein_Name                                                              | Gene Name | F1 (L/H) | F2 (L/H) | R1 (H/L) | R1 (L/H) | Mean (T/U) | S.D. | Pep. No. | %Seq. Cov. | PEP       |
|------------|---------------------------------------------------------------------------|-----------|----------|----------|----------|----------|------------|------|----------|------------|-----------|
| O43809     | Cleavage and polyadenylation specificity factor 25 kDa subunit            | CFIM25    | 1.02     | 0.97     | 1.13     | 0.88     | 1.04       | 0.08 | 18       | 82         | 2.53E-176 |
| C9JC60     | Putative uncharacterized protein NAPRT1                                   | NAPRT1    | 1.10     | 0.98     |          |          | 1.04       | 0.08 | 3        | 8          | 8.56E-60  |
| Q9P016-1   | Thymocyte nuclear protein 1                                               | HSPC144   | 1.10     | 1.08     | 0.94     | 1.06     | 1.04       | 0.09 | 17       | 69         | 2.55E-63  |
| Q14696     | LDLR chaperone MESD                                                       | KIAA0081  | 0.97     | 1.01     | 1.14     | 0.88     | 1.04       | 0.09 | 6        | 23         | 3.01E-46  |
| Q9P2X0-2   | Dolichol-phosphate mannose synthase subunit 3                             | DPM3      | 0.97     | 1.11     |          |          | 1.04       | 0.10 | 2        | 13         | 4.55E-116 |
| P62312     | U6 snRNA-associated Sm-like protein LSM6                                  | LSM6      | 1.11     | 0.97     |          |          | 1.04       | 0.10 | 5        | 56         | 2.63E-15  |
| P12004     | Cyclin                                                                    | PCNA      | 0.95     | 1.02     | 1.15     | 0.87     | 1.04       | 0.10 | 17       | 74         | 1.82E-282 |
| Q00403     | General transcription factor TFIIB                                        | GTF2B     | 1.07     | 0.92     | 1.13     | 0.88     | 1.04       | 0.11 | 8        | 37         | 2.22E-107 |
| P57737-1   | 70 kDa WD repeat tumor rejection antigen homolog                          | CORO7     | 1.04     | 0.91     | 1.17     | 0.85     | 1.04       | 0.13 | 11       | 18         | 3.94E-54  |
| O75822     | eIF3 p35                                                                  | EIF3J     | 1.00     | 1.19     | 0.93     | 1.08     | 1.04       | 0.13 | 10       | 41         | 1.00E-49  |
| Q9Y5Z4-1   | Heme-binding protein 2                                                    | C6orf34   |          | 0.94     | 1.14     | 0.88     | 1.04       | 0.14 | 4        | 22         | 6.14E-60  |
| P61088     | Bendless-like ubiquitin-conjugating enzyme                                | BLU       | 0.99     | 0.92     | 1.21     | 0.83     | 1.04       | 0.15 | 8        | 57         | 3.54E-58  |
| Q15796-1   | Mad-related protein 2                                                     | MADH2     | 0.86     | 1.08     | 1.18     | 0.85     | 1.04       | 0.16 | 4        | 11         | 7.79E-53  |
| B4E1U9     | cDNA FLJ54776, highly similar to Cell division control protein 42 homolog | CDC42     | 0.95     | 0.93     | 1.24     | 0.81     | 1.04       | 0.17 | 6        | 30         | 2.36E-53  |
| Q53EW7     | Branched-chain-amino-acid aminotransferase                                | BCAT2     | 0.92     | 0.94     | 1.26     | 0.79     | 1.04       | 0.19 | 3        | 10         | 5.30E-27  |
| Q7Z7H5-1   | Endoplasmic reticulum stress-response protein 25                          | ERS25     | 0.90     | 0.96     | 1.26     | 0.79     | 1.04       | 0.19 | 6        | 22         | 1.01E-65  |
| C9IZE4     | Proteasome (Prosome, macropain) 26S subunit, non-ATPase, 6, isoform CRA_b | hCG_23509 | 1.18     |          | 0.90     | 1.11     | 1.04       | 0.20 | 11       | 27         | 6.36E-79  |
| B2R4K7     | 60S ribosomal protein L6                                                  | RPL6      | 1.15     | 1.18     | 0.79     | 1.27     | 1.04       | 0.22 | 18       | 52         | 1.54E-180 |
| Q06587-1   | E3 ubiquitin-protein ligase RING1                                         | RING1     | 1.20     |          | 0.88     | 1.14     | 1.04       | 0.23 | 3        | 9.6        | 1.93E-06  |
| Q99523     | 100 kDa NT receptor                                                       | SORT1     |          | 1.21     | 0.87     | 1.15     | 1.04       | 0.24 | 2        | 2.6        | 1.07E-13  |
| Q9NXH9-1   | N(2),N(2)-dimethylguanosine tRNA methyltransferase                        | TRMT1     | 1.37     | 0.98     | 0.77     | 1.30     | 1.04       | 0.30 | 3        | 7.4        | 2.39E-30  |

| UniProt ID | Protein_Name                                                         | Gene Name | F1 (L/H) | F2 (L/H) | R1 (H/L) | R1 (L/H) | Mean (T/U) | S.D. | Pep. No. | %Seq. Cov. | PEP       |
|------------|----------------------------------------------------------------------|-----------|----------|----------|----------|----------|------------|------|----------|------------|-----------|
| Q9P2K5-1   | Myelin expression factor 2                                           | KIAA1341  |          | 0.80     | 1.28     | 0.78     | 1.04       | 0.34 | 2        | 3.5        | 9.79E-04  |
| C9JWM7     | Putative uncharacterized protein ARPC4                               | ARPC4     | 0.86     | 0.81     | 1.45     | 0.69     | 1.04       | 0.36 | 6        | 35         | 1.76E-45  |
| Q8IZ73     | RNA pseudouridylate synthase domain-containing protein 2             | C15orf19  | 1.35     |          | 0.73     | 1.37     | 1.04       | 0.44 | 3        | 8.4        | 3.59E-07  |
| Q96HN2     | Putative adenosylhomocysteine 3                                      | AHCYL2    |          |          | 1.04     | 0.96     | 1.04       |      | 2        | 3.1        | 4.72E-03  |
| Q9BXL7     | CARD-containing MAGUK protein 1                                      | CARD11    |          |          | 1.04     | 0.96     | 1.04       |      | 2        | 2.2        | 1.94E-12  |
| Q9H254-1   | Beta-IV spectrin                                                     | KIAA1642  |          | 1.04     |          |          | 1.04       |      | 2        | 0.5        | 2.90E-02  |
| A6NFM4     | Putative uncharacterized protein GAA                                 | GAA       | 1.04     |          |          |          | 1.04       |      | 2        | 4.5        | 3.73E-05  |
| Q9Y6N1     | Cytochrome c oxidase assembly protein COX11, mitochondrial           | COX11     | 1.04     |          |          |          | 1.04       |      | 4        | 26         | 6.53E-27  |
| Q9UK41     | ESCRT-I complex subunit VPS28                                        | VPS28     | 1.04     |          |          |          | 1.04       |      | 6        | 39         | 1.16E-50  |
| P29144     | Tripeptidyl aminopeptidase                                           | TPP2      | 1.05     | 1.05     | 1.03     | 0.97     | 1.04       | 0.01 | 21       | 21         | 7.66E-144 |
| P67775     | Replication protein C                                                | PPP2CA    | 0.98     | 1.07     | 1.08     | 0.93     | 1.04       | 0.06 | 14       | 60         | 1.18E-291 |
| Q8TF01-1   | Serine/arginine-rich-splicing regulatory protein 130                 | C6orf111  | 1.00     | 1.13     | 1.00     | 1.00     | 1.04       | 0.08 | 3        | 3.1        | 6.12E-07  |
| P28072     | Macropain delta chain                                                | LMPY      | 1.10     | 1.08     | 0.95     | 1.05     | 1.04       | 0.08 | 10       | 59         | 4.31E-150 |
| B4DLV7     | cDNA FLJ60299, highly similar to Rab GDP dissociation inhibitor beta | GDI2      | 1.05     | 1.13     | 0.95     | 1.05     | 1.04       | 0.09 | 27       | 69         | 0.00E+00  |
| O60216     | Double-strand-break repair protein rad21 homolog                     | HR23A     | 0.95     | 1.03     | 1.15     | 0.87     | 1.04       | 0.10 | 6        | 13         | 1.18E-50  |
| P27695     | APEX nuclease                                                        | APE1      | 0.97     | 0.98     | 1.18     | 0.85     | 1.04       | 0.12 | 22       | 68         | 0.00E+00  |
| Q9BTE3-1   | UPF0557 protein C10orf119                                            | C10orf119 | 1.17     | 0.93     | 1.03     | 0.97     | 1.04       | 0.12 | 5        | 10         | 7.38E-19  |
| Q9BY32     | Inosine triphosphate pyrophosphatase                                 | C20orf37  | 1.19     | 1.00     | 0.94     | 1.06     | 1.04       | 0.13 | 4        | 31         | 2.08E-45  |
| P09211     | Glutathione S-transferase P                                          | FAEES3    | 0.92     | 0.96     | 1.25     | 0.80     | 1.04       | 0.18 | 13       | 70         | 0.00E+00  |
| P22314     | Protein A1S9                                                         | A1S9T     | 0.92     | 0.94     | 1.27     | 0.79     | 1.04       | 0.20 | 49       | 57         | 0.00E+00  |
| O75683     | Surfeit locus protein 6                                              | SURF6     | 1.01     | 0.86     | 1.26     | 0.79     | 1.04       | 0.20 | 3        | 8.6        | 7.02E-10  |
| A2RRP1-1   | Neuroblastoma-amplified gene protein                                 | NAG       | 0.98     | 1.28     | 0.87     | 1.15     | 1.04       | 0.21 | 7        | 4          | 1.55E-65  |
| O15347     | High mobility group protein 2a                                       | HMG2A     | 0.84     | 0.99     | 1.30     | 0.77     | 1.04       | 0.23 | 11       | 50         | 3.03E-116 |
| Q9NVP      | ATP-dependent RNA helicase DDX18                                     | DDX18     | 1.23     | 1.15     | 0.75     | 1.33     | 1.04       | 0.26 | 13       | 24         | 1.24E-64  |

| UniProt ID | Protein_Name                                                                                                    | Gene Name | F1 (L/H) | F2 (L/H) | R1 (H/L) | R1 (L/H) | Mean (T/U) | S.D. | Pep. No. | %Seq. Cov. | PEP       |
|------------|-----------------------------------------------------------------------------------------------------------------|-----------|----------|----------|----------|----------|------------|------|----------|------------|-----------|
| 1          |                                                                                                                 |           |          |          |          |          |            |      |          |            |           |
| Q96JH7     | Deubiquitinating protein VCIP135                                                                                | KIAA1850  | 0.76     | 1.00     | 1.37     | 0.73     | 1.04       | 0.31 | 5        | 5.6        | 4.64E-74  |
| Q99877     | Histone H2B type 1-N                                                                                            | H2BFD     | 0.80     | 0.81     | 1.52     | 0.66     | 1.04       | 0.41 | 13       | 55         | 1.22E-163 |
| O95602     | DNA-directed RNA polymerase I largest subunit                                                                   | POLR1A    | 1.32     | 1.28     | 0.53     | 1.89     | 1.04       | 0.45 | 9        | 9.8        | 1.53E-74  |
| Q96ST3     | Histone deacetylase complex subunit Sin3a                                                                       | SIN3A     | 1.01     | 1.10     | 1.02     | 0.98     | 1.04       | 0.05 | 16       | 18         | 3.97E-77  |
| P30086     | Hippocampal cholinergic neurostimulating peptide                                                                | PBP       | 1.10     | 1.05     | 0.98     | 1.02     | 1.04       | 0.06 | 14       | 82         | 6.73E-213 |
| Q14232     | eIF-2B GDP-GTP exchange factor subunit alpha                                                                    | EIF2B1    | 1.10     | 1.09     | 0.94     | 1.06     | 1.04       | 0.09 | 8        | 33         | 6.24E-147 |
| Q9BTX1-1   | Nucleoporin NDC1                                                                                                | NDC1      | 1.12     | 1.33     | 0.68     | 1.47     | 1.04       | 0.33 | 3        | 5.9        | 4.87E-15  |
| P53801     | Pituitary tumor-transforming gene 1 protein-interacting protein                                                 | C21orf1   |          | 1.04     | 1.05     | 0.95     | 1.05       | 0.01 | 3        | 19         | 5.15E-19  |
| Q58FF6     | Putative heat shock protein HSP 90-beta 4                                                                       | HSP90AB4P | 1.04     |          | 1.05     | 0.95     | 1.05       | 0.01 | 8        | 12         | 1.01E-103 |
| P10415-1   | Apoptosis regulator Bcl-2                                                                                       | BCL2      |          | 1.02     | 1.07     | 0.93     | 1.05       | 0.04 | 3        | 33         | 6.51E-13  |
| Q6ICC9     | Leucine zipper protein down-regulated in cancer cells-like                                                      | LDOC1L    |          | 1.01     | 1.08     | 0.93     | 1.05       | 0.05 | 2        | 16         | 5.33E-07  |
| Q9BRX8     | Uncharacterized protein C10orf58                                                                                | C10orf58  | 1.01     | 1.08     |          |          | 1.05       | 0.05 | 5        | 20         | 5.60E-22  |
| Q9H3H3     | Basophilic leukemia-expressed protein Bles03                                                                    | BLES03    |          | 0.93     | 1.16     | 0.86     | 1.05       | 0.16 | 3        | 9.2        | 9.83E-07  |
| Q9UK53-1   | Inhibitor of growth protein 1                                                                                   | ING1      |          | 0.91     | 1.18     | 0.85     | 1.05       | 0.19 | 2        | 7.3        | 2.45E-27  |
| Q9HCJ0-2   | Trinucleotide repeat-containing gene 6C protein                                                                 | KIAA1582  |          | 0.82     | 1.27     | 0.79     | 1.05       | 0.32 | 7        | 9.4        | 4.07E-21  |
| Q9BRR8     | Evolutionarily conserved G-patch domain-containing protein                                                      | ECGP      |          | 1.27     | 0.82     | 1.22     | 1.05       | 0.32 | 4        | 6.8        | 1.01E-14  |
| Q8IZ69-1   | HpaII tiny fragments locus 9c protein                                                                           | HTF9C     | 1.38     |          | 0.71     | 1.41     | 1.05       | 0.47 | 2        | 4.5        | 1.25E-51  |
| Q96ME4     | cDNA FLJ32471 fis, clone SKNMC2000322, highly similar to Peptidyl-tRNA hydrolase 2, mitochondrial (EC 3.1.1.29) | BIT1      | 1.46     |          | 0.63     | 1.59     | 1.05       | 0.59 | 3        | 32         | 5.80E-55  |

| UniProt ID | Protein_Name                                                                              | Gene Name | F1 (L/H) | F2 (L/H) | R1 (H/L) | R1 (L/H) | Mean (T/U) | S.D. | Pep. No. | %Seq. Cov. | PEP       |
|------------|-------------------------------------------------------------------------------------------|-----------|----------|----------|----------|----------|------------|------|----------|------------|-----------|
| A6PZH2     | Glucosamine (UDP-N-acetyl)-2-epimerase/N-acetylmannosamine kinase, isoform CRA_a          | GNE       | 1.06     | 1.06     | 1.02     | 0.98     | 1.05       | 0.02 | 2        | 3.3        | 1.55E-25  |
| Q9BQ04     | RNA-binding motif protein 30                                                              | RBM30     | 1.06     | 1.06     | 1.02     | 0.98     | 1.05       | 0.02 | 12       | 32         | 2.92E-19  |
| A1E282     | Beta-actin                                                                                | ACTB      | 1.06     | 1.06     | 1.02     | 0.98     | 1.05       | 0.02 | 53       | 77         | 0.00E+00  |
| P25787     | Macropain subunit C3                                                                      | HC3       | 1.08     | 1.04     | 1.02     | 0.98     | 1.05       | 0.03 | 13       | 55         | 1.10E-173 |
| Q92688-1   | Acidic leucine-rich nuclear phosphoprotein 32 family member B                             | ANP32B    | 1.01     | 1.05     | 1.08     | 0.93     | 1.05       | 0.04 | 11       | 49         | 2.20E-252 |
| O95166     | GABA(A) receptor-associated protein                                                       | FLC3B     | 1.00     | 1.00     | 1.14     | 0.88     | 1.05       | 0.08 | 3        | 25         | 9.76E-16  |
| O75940     | 30 kDa splicing factor SMNrp                                                              | SMND C1   | 1.14     | 1.02     | 0.98     | 1.02     | 1.05       | 0.08 | 5        | 33         | 7.22E-24  |
| Q8WV B6-1  | CHL12                                                                                     | C16orf4 1 | 0.95     | 1.14     | 1.05     | 0.95     | 1.05       | 0.10 | 14       | 20         | 8.35E-133 |
| P62937     | Cyclophilin A                                                                             | CYPA      | 1.16     | 1.01     | 0.97     | 1.03     | 1.05       | 0.10 | 12       | 71         | 2.05E-278 |
| P30508     | HLA class I histocompatibility antigen, Cw-12 alpha chain                                 | HLAC      | 0.96     | 1.02     | 1.16     | 0.86     | 1.05       | 0.10 | 7        | 24         | 1.66E-168 |
| P54725     | UV excision repair protein RAD23 homolog A                                                | RAD23 A   | 1.16     | 1.04     | 0.94     | 1.06     | 1.05       | 0.11 | 7        | 29         | 5.05E-72  |
| O00203-1   | Adapter-related protein complex 3 subunit beta-1                                          | ADTB3 A   | 0.92     | 1.14     | 1.08     | 0.93     | 1.05       | 0.11 | 3        | 3.6        | 2.36E-06  |
| A1Z1D7     | MHC class I antigen                                                                       | HLA-A     | 0.99     | 0.97     | 1.18     | 0.85     | 1.05       | 0.12 | 11       | 38         | 8.14E-240 |
| B4DTK7     | cDNA FLJ61387, highly similar to Homo sapiens conserved nuclear protein NHN1 (NHN1), mRNA | NHN1      | 0.99     | 1.18     | 0.97     | 1.03     | 1.05       | 0.12 | 8        | 12         | 9.88E-32  |
| P34932     | Heat shock 70 kDa protein 4                                                               | APG2      | 1.09     | 1.14     | 0.91     | 1.10     | 1.05       | 0.12 | 50       | 66         | 0.00E+00  |
| Q9BZE4     | Chronic renal failure gene protein                                                        | CRFG      | 1.12     | 1.12     | 0.90     | 1.11     | 1.05       | 0.13 | 12       | 24         | 8.36E-64  |
| Q9BRX5-1   | DNA replication complex GINS protein PSF3                                                 | GINS3     | 1.19     | 1.04     | 0.91     | 1.10     | 1.05       | 0.14 | 10       | 62         | 7.87E-204 |
| O43818     | RRP9 homolog                                                                              | RNU31 P2  | 1.24     | 1.11     | 0.79     | 1.27     | 1.05       | 0.23 | 11       | 29         | 4.20E-121 |
| Q04760     | Aldoketomutase                                                                            | GLO1      | 0.94     | 0.86     | 1.34     | 0.75     | 1.05       | 0.26 | 9        | 52         | 8.37E-126 |
| Q9GZZ1-1   | N-acetyltransferase 13                                                                    | MAK3      | 1.26     | 1.14     | 0.74     | 1.35     | 1.05       | 0.27 | 6        | 37         | 2.53E-38  |
| Q12931     | Heat shock protein 75 kDa, mitochondrial                                                  | HSP75     | 1.24     | 1.18     | 0.72     | 1.39     | 1.05       | 0.28 | 17       | 31         | 9.44E-201 |

| UniProt ID | Protein_Name                                                                                                                          | Gene Name        | F1 (L/H) | F2 (L/H) | R1 (H/L) | R1 (L/H) | Mean (T/U) | S.D. | Pep. No. | %Seq. Cov. | PEP       |
|------------|---------------------------------------------------------------------------------------------------------------------------------------|------------------|----------|----------|----------|----------|------------|------|----------|------------|-----------|
| Q9UNI6     | Dual specificity protein phosphatase 12                                                                                               | DUSP12           | 0.69     | 1.15     | 1.3      | 0.77     | 1.05       | 0.32 | 2        | 7.9        | 4.34E-39  |
| P62805     | Histone H4                                                                                                                            | H4/A             | 0.85     | 0.85     | 1.44     | 0.69     | 1.05       | 0.34 | 18       | 69         | 2.55E-287 |
| B2R960     | cDNA, FLJ94230, highly similar to Homo sapiens thioredoxin-like 1 (TXNL1), mRNA                                                       | TRP32            | 1.29     | 1.20     | 0.65     | 1.54     | 1.05       | 0.35 | 11       | 46         | 4.01E-119 |
| Q00534     | Cell division protein kinase 6                                                                                                        | CDK6             | 1.30     | 1.30     | 0.54     | 1.85     | 1.05       | 0.44 | 11       | 41         | 7.45E-211 |
| Q9BXP5-1   | Arsenite-resistance protein 2                                                                                                         | ARS2             | 1.01     | 1.06     | 1.07     | 0.93     | 1.05       | 0.03 | 41       | 46         | 1.23E-205 |
| Q8N163-1   | Deleted in breast cancer gene 1 protein                                                                                               | DBC1             | 1.08     | 0.99     | 1.07     | 0.93     | 1.05       | 0.05 | 31       | 46         | 0.00E+00  |
| O43143     | ATP-dependent RNA helicase #46                                                                                                        | DBP1             | 0.99     | 1.04     | 1.11     | 0.90     | 1.05       | 0.06 | 24       | 30         | 3.77E-195 |
| B3KUY2     | cDNA FLJ40895 fis, clone UTERU2002294, highly similar to Prostaglandin E synthase 3 (EC 5.3.99.3)                                     | hCG_2016483      | 1.15     | 1.03     | 0.97     | 1.03     | 1.05       | 0.09 | 7        | 41         | 2.77E-108 |
| B2R8E4     | cDNA, FLJ93859, highly similar to Homo sapiens protein phosphatase 1A (formerly 2C), magnesium-dependent, alpha isoform (PPM1A), mRNA | PPM1A            | 1.02     | 1.16     | 0.97     | 1.03     | 1.05       | 0.10 | 6        | 16         | 5.97E-23  |
| Q9BV73-1   | 250 kDa centrosomal protein                                                                                                           | CEP2             |          | 1.13     | 0.97     | 1.03     | 1.05       | 0.11 | 4        | 1.6        | 6.73E-17  |
| B1AHD1     | NHP2 non-histone chromosome protein 2-like 1 ( <i>S. cerevisiae</i> )                                                                 | CTA-216E10.8-008 | 1.13     | 1.22     | 0.80     | 1.25     | 1.05       | 0.22 | 5        | 39         | 1.22E-81  |
| Q9GZL7     | Ribosome biogenesis protein WDR12                                                                                                     | WDR12            | 1.16     | 1.23     | 0.76     | 1.32     | 1.05       | 0.25 | 7        | 20         | 1.02E-53  |
| Q9NS69     | Mitochondrial import receptor subunit TOM22 homolog                                                                                   | TOM22            | 1.38     | 1.22     | 0.55     | 1.82     | 1.05       | 0.44 | 4        | 51         | 9.52E-89  |
| Q13418     | 59 kDa serine/threonine-protein kinase                                                                                                | ILK              | 1.05     | 1.05     | 1.05     | 0.95     | 1.05       | 0.00 | 2        | 5.5        | 7.12E-03  |
| Q7Z739     | YTH domain family protein 3                                                                                                           | YTHDF3           | 1.05     | 1.05     | 1.05     | 0.95     | 1.05       | 0.00 | 7        | 14         | 2.06E-56  |
| P23193-1   | Transcription elongation factor A protein 1                                                                                           | GTF2S            | 1.05     | 1.06     | 1.04     | 0.96     | 1.05       | 0.01 | 16       | 63         | 1.19E-198 |
| Q99623     | B-cell receptor-associated protein BAP37                                                                                              | BAP              | 1.08     | 1.06     | 1.01     | 0.99     | 1.05       | 0.04 | 18       | 64         | 1.56E-227 |
| Q9Y6N      | Sulfide:quinone                                                                                                                       | CGI-44           |          | 1.02     | 1.08     | 0.93     | 1.05       | 0.04 | 9        | 29         | 2.61E-96  |

| UniProt ID | Protein_Name                                                                    | Gene Name | F1 (L/H) | F2 (L/H) | R1 (H/L) | R1 (L/H) | Mean (T/U) | S.D. | Pep. No. | %Seq. Cov. | PEP       |
|------------|---------------------------------------------------------------------------------|-----------|----------|----------|----------|----------|------------|------|----------|------------|-----------|
| 5          | oxidoreductase, mitochondrial                                                   |           |          |          |          |          |            |      |          |            |           |
| O43169     | Cytochrome b5 outer mitochondrial membrane isoform                              | CYB5B     | 1.08     |          | 1.02     | 0.98     | 1.05       | 0.04 | 5        | 55         | 1.98E-57  |
| Q13595-1   | Transformer-2 protein homolog A                                                 | TRA2A     | 1.03     | 1.02     | 1.10     | 0.91     | 1.05       | 0.04 | 7        | 31         | 7.17E-75  |
| Q9UBS4     | APOBEC1-binding protein 2                                                       | DNAJB11   | 1.06     | 1.09     | 1.00     | 1.00     | 1.05       | 0.05 | 10       | 30         | 4.41E-108 |
| Q9UIA9     | Exportin-7                                                                      | KIAA0745  | 1.07     | 1.09     | 0.99     | 1.01     | 1.05       | 0.05 | 15       | 20         | 1.11E-101 |
| Q99459     | Cell division cycle 5-like protein                                              | CDC5L     | 1.05     | 0.99     | 1.11     | 0.90     | 1.05       | 0.06 | 27       | 44         | 4.39E-206 |
| P35232     | Prohibitin                                                                      | PHB       | 1.06     | 1.11     | 0.98     | 1.02     | 1.05       | 0.07 | 19       | 86         | 0.00E+00  |
| B4DJQ5     | cDNA FLJ59211, highly similar to Glucosidase 2 subunit beta                     | G19P1     | 0.97     | 1.12     | 1.06     | 0.94     | 1.05       | 0.08 | 20       | 40         | 2.27E-180 |
| P49454     | AH antigen                                                                      | CENPF     | 0.95     | 1.09     | 1.11     | 0.90     | 1.05       | 0.09 | 14       | 5.9        | 3.91E-97  |
| Q9UHY7-1   | 2,3-diketo-5-methylthio-1-phosphopentane phosphatase                            | ENOPH1    | 0.98     |          | 1.12     | 0.89     | 1.05       | 0.10 | 5        | 24         | 5.66E-114 |
| Q9UM22-2   | Mammalian ependymin-related protein 1                                           | EPDR1     | 1.04     | 1.16     | 0.95     | 1.05     | 1.05       | 0.11 | 4        | 12         | 7.64E-20  |
| P84095     | Rho-related GTP-binding protein RhoG                                            | ARHG      | 0.93     | 1.08     | 1.14     | 0.88     | 1.05       | 0.11 | 9        | 52         | 5.91E-149 |
| Q9HD45     | EP70-P-iso                                                                      | SMBP      | 1.14     | 1.08     | 0.93     | 1.08     | 1.05       | 0.11 | 2        | 3.7        | 4.83E-06  |
| O43813     | 40 kDa erythrocyte membrane protein                                             | GPR69A    | 1.00     | 0.97     | 1.18     | 0.85     | 1.05       | 0.11 | 6        | 15         | 1.65E-28  |
| P46087-1   | Nucleolar protein 1                                                             | NOL1      | 1.10     | 1.13     | 0.92     | 1.09     | 1.05       | 0.11 | 28       | 35         | 2.37E-210 |
| Q13868     | Exosome complex exonuclease RRP4                                                | EXOSC2    | 0.93     | 1.06     | 1.16     | 0.86     | 1.05       | 0.12 | 4        | 23         | 1.44E-37  |
| Q12972-1   | Activator of RNA decay                                                          | ARD1      | 1.03     | 0.94     | 1.18     | 0.85     | 1.05       | 0.12 | 6        | 23         | 5.01E-25  |
| O15173     | Membrane-associated progesterone receptor component 2                           | DG6       | 1.12     | 1.13     | 0.90     | 1.11     | 1.05       | 0.13 | 6        | 22         | 6.86E-64  |
| Q99567     | 88 kDa nucleoporin                                                              | NUP88     | 1.19     | 1.05     | 0.91     | 1.10     | 1.05       | 0.14 | 4        | 9.2        | 9.36E-20  |
| Q9Y5M8     | Protein APMCF1                                                                  | PSEC0230  | 1.11     | 1.15     | 0.89     | 1.12     | 1.05       | 0.14 | 7        | 34         | 2.26E-161 |
| Q9NX46     | [Protein ADP-ribosylarginine] hydrolase-like protein 2                          | ADPRHL2   | 0.95     | 0.99     | 1.21     | 0.83     | 1.05       | 0.14 | 3        | 11         | 2.15E-29  |
| B4DX18     | cDNA FLJ56327, highly similar to 26S proteasome non-ATPase regulatory subunit 8 | hCG_42853 | 1.21     | 1.04     | 0.90     | 1.11     | 1.05       | 0.16 | 6        | 22         | 4.50E-27  |



| UniProt ID | Protein_Name                                                                                                                      | Gene Name      | F1 (L/H) | F2 (L/H) | R1 (H/L) | R1 (L/H) | Mean (T/U) | S.D. | Pep. No. | %Seq. Cov. | PEP       |
|------------|-----------------------------------------------------------------------------------------------------------------------------------|----------------|----------|----------|----------|----------|------------|------|----------|------------|-----------|
| O95881     | Endoplasmic reticulum resident protein 18                                                                                         | TLP19          | 1.18     | 0.92     |          |          | 1.05       | 0.18 | 2        | 13         | 2.85E-05  |
| P24928     | DNA-directed RNA polymerase II subunit A                                                                                          | POLR2          | 1.06     | 1.23     | 0.86     | 1.16     | 1.05       | 0.19 | 21       | 16         | 3.59E-142 |
| Q9BQG0-2   | Myb-binding protein 1A                                                                                                            | MYBBP1A        | 1.14     | 1.18     | 0.83     | 1.20     | 1.05       | 0.19 | 32       | 32         | 6.16E-239 |
| B0QY89     | Eukaryotic translation initiation factor 3, subunit E interacting protein                                                         | AL022311.1-001 | 1.14     | 1.19     | 0.82     | 1.22     | 1.05       | 0.20 | 13       | 25         | 1.43E-133 |
| Q6PL18-1   | AAA nuclear coregulator cancer-associated protein                                                                                 | ATAD2          | 0.89     |          | 1.21     | 0.83     | 1.05       | 0.23 | 2        | 2.9        | 2.58E-05  |
| Q96TA2-1   | ATP-dependent metalloprotease FtsH1                                                                                               | FTSH1          | 1.28     | 0.81     | 1.06     | 0.94     | 1.05       | 0.24 | 5        | 9.1        | 0.00E+00  |
| Q14978-2   | 140 kDa nucleolar phosphoprotein                                                                                                  | KIAA0035       | 1.2      | 1.21     | 0.74     | 1.35     | 1.05       | 0.27 | 22       | 26         | 1.51E-133 |
| Q8TEQ6     | Gem-associated protein 5                                                                                                          | GEMIN5         | 1.24     |          | 0.86     | 1.16     | 1.05       | 0.27 | 5        | 5.3        | 8.86E-31  |
| Q6ZSA3     | cDNA FLJ45695 fis, clone FEBRA2013570, highly similar to 2-oxoisovalerate dehydrogenase alpha subunit, mitochondrial (EC 1.2.4.4) | BCKDHA         | 0.84     | 0.93     | 1.38     | 0.72     | 1.05       | 0.29 | 3        | 8.1        | 1.13E-51  |
| P09417     | Dihydropteridine reductase                                                                                                        | DHPR           | 0.86     | 0.90     | 1.39     | 0.72     | 1.05       | 0.30 | 5        | 33         | 4.14E-56  |
| P42696-1   | RNA-binding motif protein 34                                                                                                      | KIAA0117       | 1.32     | 1.12     | 0.71     | 1.41     | 1.05       | 0.31 | 5        | 17         | 1.80E-36  |
| Q9Y388     | RNA-binding motif protein, X-linked 2                                                                                             | CGI-79         |          | 0.81     | 1.29     | 0.78     | 1.05       | 0.34 | 2        | 7.1        | 2.98E-12  |
| Q15814     | Tubulin-folding cofactor C                                                                                                        | TBCC           |          |          | 1.05     | 0.95     | 1.05       |      | 2        | 6.1        | 1.45E-12  |
| Q9NS91     | E3 ubiquitin-protein ligase RAD18                                                                                                 | RAD18          |          |          | 1.05     | 0.95     | 1.05       |      | 3        | 7.5        | 5.21E-19  |
| Q9Y2S6     | Coiled-coil domain-containing protein 72                                                                                          | CCDC72         |          | 1.05     |          |          | 1.05       |      | 2        | 30         | 1.05E-02  |
| P10109     | Adrenal ferredoxin                                                                                                                | ADX            | 1.05     |          |          |          | 1.05       |      | 2        | 9.8        | 8.94E-04  |
| O60927     | Hemochromatosis candidate gene V protein                                                                                          | HCGV           | 1.05     |          |          |          | 1.05       |      | 2        | 33         | 1.09E-11  |
| Q6GMV2     | Protein NN8-4AG                                                                                                                   | RAI15          |          | 1.05     |          |          | 1.05       |      | 3        | 7.4        | 1.62E-07  |
| P61225     | Ras-related protein Rap-2b                                                                                                        | RAP2B          | 1.05     |          |          |          | 1.05       |      | 3        | 27         | 4.61E-24  |
| O15321     | MP70 protein family member                                                                                                        | TM9SF1         |          | 1.05     |          |          | 1.05       |      | 3        | 3.6        | 1.72E-33  |
| P54652     | Heat shock-related 70 kDa protein 2                                                                                               | HSPA2          | 1.05     |          |          |          | 1.05       |      | 15       | 20         | 2.19E-176 |

| UniProt ID | Protein_Name                                                               | Gene Name | F1 (L/H) | F2 (L/H) | R1 (H/L) | R1 (L/H) | Mean (T/U) | S.D. | Pep. No. | %Seq. Cov. | PEP       |
|------------|----------------------------------------------------------------------------|-----------|----------|----------|----------|----------|------------|------|----------|------------|-----------|
| B7Z8Z6     | cDNA FLJ53276, moderately similar to DNA replication licensing factor MCM2 | MCM2      |          | 1.05     |          |          | 1.05       |      | 21       | 23         | 3.16E-221 |
| P39748     | DNase IV                                                                   | FEN1      | 1.01     | 1.00     | 1.15     | 0.87     | 1.05       | 0.08 | 16       | 47         | 5.68E-224 |
| Q9BW19     | Kinesin-like protein 2                                                     | HSET      | 1.16     | 1.10     | 0.90     | 1.11     | 1.05       | 0.14 | 9        | 19         | 2.44E-125 |
| P00441     | Superoxide dismutase [Cu-Zn]                                               | SOD1      | 1.17     | 1.09     | 0.90     | 1.11     | 1.05       | 0.14 | 8        | 78         | 3.22E-126 |
| P53621-2   | Alpha-coat protein                                                         | COPA      | 1.06     | 1.20     | 0.90     | 1.11     | 1.05       | 0.15 | 27       | 31         | 2.15E-190 |
| P46778     | 60S ribosomal protein L21                                                  | RPL21     | 1.16     | 1.15     | 0.85     | 1.18     | 1.05       | 0.18 | 7        | 38         | 7.27E-73  |
| Q9H3K6-1   | BolA-like protein 2                                                        | BOLA2     | 1.18     | 1.17     | 0.81     | 1.23     | 1.05       | 0.21 | 4        | 35         | 3.37E-56  |
| B4DGU9     | cDNA FLJ59232, highly similar to ARF GTPase-activating protein GIT1        | GIT1      | 1.05     | 1.07     | 1.04     | 0.96     | 1.05       | 0.02 | 8        | 15         | 1.48E-40  |
| P12956     | 70 kDa subunit of Ku antigen                                               | G22P1     | 1.03     | 1.06     | 1.07     | 0.93     | 1.05       | 0.02 | 39       | 55         | 0.00E+00  |
| Q9BUL5-1   | PDH-containing protein JUNE-1                                              | PHF23     | 1.04     | 1.04     | 1.08     | 0.93     | 1.05       | 0.02 | 2        | 6          | 4.03E-08  |
| O43402     | Neighbor of COX4                                                           | C16orf2   | 1.01     | 1.05     | 1.10     | 0.91     | 1.05       | 0.05 | 5        | 19         | 3.45E-24  |
| Q96KP4-1   | CNDP dipeptidase 2                                                         | CN2       | 1.08     | 1.08     | 1.00     | 1.00     | 1.05       | 0.05 | 14       | 41         | 7.05E-51  |
| O95202-1   | LETM1 and EF-hand domain-containing protein 1, mitochondrial               | LETM1     | 0.99     | 1.09     | 1.08     | 0.93     | 1.05       | 0.06 | 16       | 28         | 1.95E-162 |
| P78406     | mRNA export factor                                                         | MRNP41    | 0.99     | 1.03     | 1.14     | 0.88     | 1.05       | 0.08 | 9        | 24         | 2.33E-57  |
| O75643-1   | Activating signal cointegrator 1 complex subunit 3-like 1                  | ASCC3L1   | 1.10     | 1.11     | 0.95     | 1.05     | 1.05       | 0.09 | 65       | 39         | 0.00E+00  |
| P49903     | Selenide, water dikinase 1                                                 | SELD      | 1.09     | 0.95     | 1.12     | 0.89     | 1.05       | 0.09 | 7        | 27         | 2.22E-56  |
| Q9BRG1     | Dermal papilla-derived protein 9                                           | DERP9     | 1.15     | 1.06     | 0.95     | 1.05     | 1.05       | 0.10 | 5        | 32         | 4.28E-22  |
| P51665     | 26S proteasome non-ATPase regulatory subunit 7                             | MOV34L    | 1.16     | 1.05     | 0.95     | 1.05     | 1.05       | 0.11 | 10       | 40         | 2.44E-74  |
| P26368-1   | Splicing factor U2AF 65 kDa subunit                                        | U2AF2     | 1.16     | 1.05     | 0.95     | 1.05     | 1.05       | 0.11 | 16       | 50         | 1.05E-215 |
| Q9NZ09-1   | Nasopharyngeal carcinoma-associated gene 20 protein                        | NAG20     | 0.96     | 1.02     | 1.18     | 0.85     | 1.05       | 0.11 | 2        | 5.1        | 2.10E-41  |
| O43390-1   | Heterogeneous nuclear ribonucleoprotein R                                  | HNRNPR    | 0.96     | 1.00     | 1.20     | 0.83     | 1.05       | 0.13 | 25       | 40         | 0.00E+00  |
| P40429     | 23 kDa highly basic protein                                                | RPL13A    | 1.10     | 1.18     | 0.88     | 1.14     | 1.05       | 0.16 | 11       | 33         | 1.32E-24  |

| UniProt ID | Protein_Name                                        | Gene Name  | F1 (L/H) | F2 (L/H) | R1 (H/L) | R1 (L/H) | Mean (T/U) | S.D. | Pep. No. | %Seq. Cov. | PEP       |
|------------|-----------------------------------------------------|------------|----------|----------|----------|----------|------------|------|----------|------------|-----------|
| P62266     | 40S ribosomal protein S23                           | RPS23      | 1.04     | 1.24     | 0.88     | 1.14     | 1.05       | 0.18 | 7        | 50         | 3.28E-32  |
| Q4G0J3-1   | La ribonucleoprotein domain family member 7         | HDCM A18P  | 1.08     | 1.23     | 0.85     | 1.18     | 1.05       | 0.19 | 5        | 11         | 1.31E-30  |
| Q12788     | Transducin beta-like protein 3                      | SAZD       | 1.10     | 1.28     | 0.78     | 1.28     | 1.05       | 0.25 | 8        | 13         | 1.64E-49  |
| Q9BRJ6     | Uncharacterized protein C7orf50                     | C7orf50    | 1.19     | 1.25     | 0.72     | 1.39     | 1.05       | 0.29 | 8        | 47         | 1.91E-73  |
| Q2NL82     | Pre-rRNA-processing protein TSR1 homolog            | KIAA1401   | 1.19     | 1.25     | 0.72     | 1.39     | 1.05       | 0.29 | 10       | 16         | 3.42E-54  |
| O15226     | NF-kappa-B-repressing factor                        | ITBA4      |          | 1.14     | 0.97     | 1.03     | 1.06       | 0.12 | 4        | 5.4        | 2.19E-11  |
| O00560-1   | Melanoma differentiation-associated protein 9       | MDA9       | 0.88     |          | 1.23     | 0.81     | 1.06       | 0.25 | 3        | 26         | 2.40E-54  |
| Q9NWU5-1   | 39S ribosomal protein L22, mitochondrial            | HSPC158    | 1.25     | 0.86     |          |          | 1.06       | 0.28 | 2        | 12         | 2.02E-22  |
| Q96GN5-1   | Cell division cycle-associated 7-like protein       | CDCA7L     |          | 0.83     | 1.28     | 0.78     | 1.06       | 0.32 | 3        | 5.9        | 7.87E-07  |
| P42229     | Signal transducer and activator of transcription 5A | STAT5      |          | 0.73     | 1.38     | 0.72     | 1.06       | 0.46 | 4        | 4.5        | 8.61E-08  |
| Q9NVU7-1   | Nucleolar protein 130                               | NUC130     |          | 1.11     | 1.00     | 1.00     | 1.06       | 0.08 | 3        | 5.5        | 1.69E-05  |
| Q8NHV1     | GTPase IMAP family member 7                         | GIMAP7     | 0.74     |          | 1.37     | 0.73     | 1.06       | 0.45 | 5        | 24         | 9.44E-260 |
| Q96CN7     | Isochorismatase domain-containing protein 1         | CGI111     | 1.18     | 1.13     | 0.86     | 1.16     | 1.06       | 0.17 | 5        | 24         | 3.21E-47  |
| O95816     | BAG family molecular chaperone regulator 2          | BAG2       | 1.09     | 1.07     | 1.01     | 0.99     | 1.06       | 0.04 | 14       | 62         | 4.40E-222 |
| P30876     | DNA-directed RNA polymerase II 140 kDa polypeptide  | POLR2B     | 1.05     | 1.01     | 1.11     | 0.90     | 1.06       | 0.05 | 26       | 26         | 1.31E-90  |
| P51148     | L1880                                               | RAB5C      | 0.99     | 1.05     | 1.13     | 0.88     | 1.06       | 0.07 | 10       | 65         | 1.55E-254 |
| P07339     | Cathepsin D                                         | CPSD       | 1.07     | 0.98     | 1.12     | 0.89     | 1.06       | 0.07 | 12       | 32         | 1.78E-157 |
| Q5TEC6     | Histone H3                                          | HIST2H3PS2 | 1.05     | 0.97     | 1.15     | 0.87     | 1.06       | 0.09 | 7        | 39         | 1.01E-21  |
| Q6GSG7     | Coiled-coil domain-containing protein 6             | CCDC6      | 0.98     | 1.02     | 1.17     | 0.85     | 1.06       | 0.10 | 8        | 22         | 6.05E-32  |
| Q96T37-1   | One-twenty two protein 1                            | OTT        | 0.94     | 1.07     | 1.16     | 0.86     | 1.06       | 0.11 | 17       | 23         | 3.08E-122 |
| Q15007-1   | Female-lethal(2)D homolog                           | KIAA0105   | 0.94     | 1.19     | 1.04     | 0.96     | 1.06       | 0.13 | 3        | 12         | 2.16E-117 |
| P53992     | Protein transport protein Sec24C                    | KIAA0079   | 1.17     | 1.09     | 0.91     | 1.10     | 1.06       | 0.13 | 8        | 11         | 2.78E-50  |
| P49773     | Adenosine 5-monophosphoramidase                     | HINT       | 1.15     | 1.12     | 0.90     | 1.11     | 1.06       | 0.14 | 8        | 79         | 1.52E-63  |
| P15121     | Aldehyde reductase                                  | AKR1B1     | 0.93     | 1.02     | 1.22     | 0.82     | 1.06       | 0.15 | 12       | 36         | 2.01E-21  |

| UniProt ID | Protein_Name                                                                  | Gene Name | F1 (L/H) | F2 (L/H) | R1 (H/L) | R1 (L/H) | Mean (T/U) | S.D. | Pep. No. | %Seq. Cov. | PEP       |
|------------|-------------------------------------------------------------------------------|-----------|----------|----------|----------|----------|------------|------|----------|------------|-----------|
| Q5RKV6     | Exosome complex exonuclease MTR3                                              | EXOSC6    | 1.12     | 1.17     | 0.88     | 1.14     | 1.06       | 0.16 | 10       | 34         | 5.73E-63  |
| P14678-3   | Sm protein B/B                                                                | COD       | 1.20     | 1.09     | 0.88     | 1.14     | 1.06       | 0.16 | 11       | 29         | 4.32E-57  |
| Q9NYU2-1   | UDP--Glc:glycoprotein glucosyltransferase                                     | GT        | 1.17     | 1.13     | 0.87     | 1.15     | 1.06       | 0.16 | 24       | 24         | 9.95E-226 |
| Q9BUL8     | Cerebral cavernous malformations 3 protein                                    | CCM3      | 0.98     | 0.94     | 1.25     | 0.80     | 1.06       | 0.17 | 4        | 29         | 1.48E-57  |
| Q92797-1   | Symplekin                                                                     | SPK       | 1.13     | 1.21     | 0.83     | 1.20     | 1.06       | 0.20 | 15       | 22         | 1.85E-118 |
| Q00796     | L-iditol 2-dehydrogenase                                                      | SORD      | 1.12     | 1.23     | 0.82     | 1.22     | 1.06       | 0.21 | 10       | 39         | 2.92E-142 |
| Q9Y5S9-1   | Binder of OVCA1-1                                                             | HSPC114   | 1.16     | 1.22     | 0.79     | 1.27     | 1.06       | 0.23 | 7        | 33         | 1.70E-98  |
| P15374     | Ubiquitin carboxyl-terminal hydrolase isozyme L3                              | UCHL3     | 1.23     | 1.17     | 0.77     | 1.30     | 1.06       | 0.25 | 11       | 73         | 1.30E-135 |
| Q9BPW8     | Protein NipSnap homolog 1                                                     | NIPSNAP1  | 0.74     | 0.73     | 1.70     | 0.59     | 1.06       | 0.56 | 9        | 30         | 3.62E-47  |
| P31946-1   | 14-3-3 protein beta/alpha                                                     | YWHA B    | 1.02     | 1.09     | 1.06     | 0.94     | 1.06       | 0.04 | 19       | 71         | 0.00E+00  |
| P07910-2   | Heterogeneous nuclear ribonucleoproteins C1/C2                                | HNRNP C   | 1.02     | 1.05     | 1.10     | 0.91     | 1.06       | 0.04 | 24       | 60         | 0.00E+00  |
| P35606     | Beta-coat protein                                                             | COPB2     | 1.04     | 1.28     | 0.85     | 1.18     | 1.06       | 0.22 | 14       | 18         | 1.15E-75  |
| P36551     | Coproporphyrinogen-III oxidase, mitochondrial                                 | CPO       | 1.03     | 1.14     | 1.01     | 0.99     | 1.06       | 0.07 | 6        | 19         | 4.70E-28  |
| O60925     | Prefoldin subunit 1                                                           | PFD1      | 1.04     | 0.97     | 1.17     | 0.85     | 1.06       | 0.10 | 5        | 36         | 5.76E-23  |
| P41252     | Isoleucine--tRNA ligase                                                       | IARS      | 1.13     | 1.13     | 0.92     | 1.09     | 1.06       | 0.12 | 40       | 39         | 0.00E+00  |
| P14550     | Alcohol dehydrogenase [NADP+]                                                 | AKR1A1    | 0.98     | 0.96     | 1.24     | 0.81     | 1.06       | 0.16 | 13       | 51         | 8.56E-104 |
| P50613     | 39 kDa protein kinase                                                         | CDK7      | 1.27     | 0.92     | 0.99     | 1.01     | 1.06       | 0.19 | 4        | 12         | 1.74E-24  |
| Q99729-3   | APOBEC1-binding protein 1                                                     | ABBP1     | 1.15     | 1.20     | 0.83     | 1.20     | 1.06       | 0.20 | 13       | 42         | 1.82E-209 |
| O96008-1   | Mitochondrial import receptor subunit TOM40 homolog                           | C19orf1   | 1.19     | 1.17     | 0.82     | 1.22     | 1.06       | 0.21 | 10       | 40         | 2.51E-127 |
| Q8TEX9-2   | Importin-4                                                                    | IMP4B     | 1.23     | 1.25     | 0.70     | 1.43     | 1.06       | 0.31 | 11       | 17         | 2.06E-198 |
| P04843     | Dolichyl-diphosphooligosaccharide--protein glycosyltransferase 67 kDa subunit | RPN1      | 1.05     | 1.05     | 1.08     | 0.93     | 1.06       | 0.02 | 26       | 50         | 8.59E-183 |
| P04179     | Superoxide dismutase [Mn], mitochondrial                                      | SOD2      | 1.06     | 1.04     | 1.08     | 0.93     | 1.06       | 0.02 | 9        | 34         | 6.15E-92  |
| P80294     | Metallothionein-0                                                             | MT1H      | 1.08     |          | 1.04     | 0.96     | 1.06       | 0.03 | 2        | 33         | 3.96E-06  |

| UniProt ID | Protein_Name                                                                   | Gene Name        | F1 (L/H) | F2 (L/H) | R1 (H/L) | R1 (L/H) | Mean (T/U) | S.D. | Pep. No. | %Seq. Cov. | PEP       |
|------------|--------------------------------------------------------------------------------|------------------|----------|----------|----------|----------|------------|------|----------|------------|-----------|
| A0JLT2-1   | Lung cancer metastasis-related protein 1                                       | LCMR1            | 1.08     |          | 1.04     | 0.96     | 1.06       | 0.03 | 2        | 20         | 4.32E-07  |
| Q9Y3A6     | Transmembrane emp24 domain-containing protein 5                                | CGI-100          | 1.08     |          | 1.04     | 0.96     | 1.06       | 0.03 | 2        | 7          | 1.48E-02  |
| Q92622     | Uncharacterized protein KIAA0226                                               | KIAA0226         | 1.08     |          | 1.04     | 0.96     | 1.06       | 0.03 | 2        | 3          | 8.45E-05  |
| Q9BQ95-1   | Evolutionarily conserved signaling intermediate in Toll pathway, mitochondrial | ECSIT            | 1.08     |          | 1.04     | 0.96     | 1.06       | 0.03 | 4        | 19         | 5.35E-26  |
| P06729     | Erythrocyte receptor                                                           | CD2              | 1.08     |          | 1.04     | 0.96     | 1.06       | 0.03 | 10       | 31         | 3.28E-79  |
| Q15287-1   | RNA-binding protein with serine-rich domain 1                                  | LDC2             | 1.11     |          | 1.01     | 0.99     | 1.06       | 0.07 | 2        | 14         | 4.25E-25  |
| Q59G94     | Zinc finger protein 207 variant                                                | ZNF207           | 1.16     | 1.04     | 0.98     | 1.02     | 1.06       | 0.09 | 4        | 9.3        | 3.57E-37  |
| A4FS09     | Minichromosome maintenance protein 4                                           | MCM4             | 0.99     |          | 1.13     | 0.88     | 1.06       | 0.10 | 37       | 52         | 0.00E+00  |
| Q92934     | Bcl2 antagonist of cell death                                                  | BAD              | 1.13     |          | 0.99     | 1.01     | 1.06       | 0.10 | 2        | 14         | 1.82E-05  |
| Q9NR56-1   | Muscleblind-like protein 1                                                     | EXP              |          | 1.13     | 0.99     | 1.01     | 1.06       | 0.10 | 5        | 12         | 1.70E-08  |
| O00217     | Complex I-23kD                                                                 | NDUFS8           | 0.95     |          | 1.17     | 0.85     | 1.06       | 0.16 | 3        | 17         | 1.72E-43  |
| Q92947-1   | Glutaryl-CoA dehydrogenase, mitochondrial                                      | GCDH             | 1.17     | 0.95     |          |          | 1.06       | 0.16 | 2        | 5.9        | 2.84E-33  |
| Q13363     | C-terminal-binding protein 1                                                   | CTBP             | 0.90     | 1.05     | 1.23     | 0.81     | 1.06       | 0.17 | 10       | 29         | 3.33E-33  |
| P22061-1   | L-isoaspartyl protein carboxyl methyltransferase                               | PCMT1            | 0.92     | 0.99     | 1.27     | 0.79     | 1.06       | 0.19 | 10       | 71         | 2.23E-118 |
| Q9H9B4     | Sideroflexin-1                                                                 | SFXN1            | 1.11     | 1.24     | 0.83     | 1.20     | 1.06       | 0.21 | 11       | 46         | 1.11E-141 |
| P33316-1   | Deoxyuridine 5-triphosphate nucleotidohydrolase, mitochondrial                 | DUT              | 1.19     | 1.22     | 0.77     | 1.30     | 1.06       | 0.25 | 12       | 54         | 1.36E-135 |
| Q9Y5B6-1   | GC-rich sequence DNA-binding factor homolog                                    | C21orf66         | 0.83     |          | 1.29     | 0.78     | 1.06       | 0.33 | 4        | 7.6        | 3.26E-07  |
| P57058     | Hormonally up-regulated neu tumor-associated kinase                            | HUNK             |          |          | 1.06     | 0.94     | 1.06       |      | 2        | 3.1        | 1.22E-02  |
| Q5VV67     | Peroxisome proliferator-activated receptor gamma coactivator-related protein 1 | KIAA0595         |          |          | 1.06     | 0.94     | 1.06       |      | 2        | 1          | 2.00E-02  |
| Q5TEG3     | Novel enoyl-CoA hydratase/isomerase family protein                             | RP3-351K20.2-015 |          |          | 1.06     | 0.94     | 1.06       |      | 3        | 21         | 1.02E-10  |

| UniProt ID | Protein_Name                                                                  | Gene Name | F1 (L/H) | F2 (L/H) | R1 (H/L) | R1 (L/H) | Mean (T/U) | S.D. | Pep. No. | %Seq. Cov. | PEP       |
|------------|-------------------------------------------------------------------------------|-----------|----------|----------|----------|----------|------------|------|----------|------------|-----------|
| O15118     | Niemann-Pick C1 protein                                                       | NPC1      | 1.06     |          |          |          | 1.06       |      | 2        | 1.7        | 9.99E-13  |
| Q9H0V9-2   | Lectin mannose-binding 2-like                                                 | LMAN2L    |          | 1.06     |          |          | 1.06       |      | 2        | 6.7        | 3.48E-02  |
| C9K060     | Putative uncharacterized protein WBSCR22                                      | WBSCR22   |          | 1.06     |          |          | 1.06       |      | 2        | 10         | 2.60E-36  |
| P50452     | Cytoplasmic antiproteinase 2                                                  | PI8       |          | 1.06     |          |          | 1.06       |      | 3        | 9.4        | 7.42E-16  |
| Q5TA95     | Tetratricopeptide repeat domain 4                                             | hCG_32473 |          | 1.06     |          |          | 1.06       |      | 3        | 8          | 2.97E-08  |
| P09493-3   | Alpha-tropomyosin                                                             | C15orf13  |          | 1.06     |          |          | 1.06       |      | 6        | 16         | 1.94E-34  |
| P62987     | 60S ribosomal protein L40                                                     | UBA52     |          | 1.06     |          |          | 1.06       |      | 7        | 49         | 1.67E-66  |
| O75533     | Pre-mRNA-splicing factor SF3b 155 kDa subunit                                 | SAP155    | 1.11     | 1.12     | 0.95     | 1.05     | 1.06       | 0.10 | 55       | 53         | 0.00E+00  |
| O94826     | Mitochondrial import receptor subunit TOM70                                   | KIAA0719  | 1.04     | 1.09     | 1.06     | 0.94     | 1.06       | 0.03 | 8        | 16         | 2.68E-115 |
| P31942-1   | Heterogeneous nuclear ribonucleoprotein 2H9                                   | HNRNP H3  | 1.02     | 1.02     | 1.15     | 0.87     | 1.06       | 0.08 | 9        | 38         | 5.55E-228 |
| P23786     | Carnitine O-palmitoyltransferase 2, mitochondrial                             | CPT2      | 1.08     | 0.96     | 1.15     | 0.87     | 1.06       | 0.10 | 4        | 6.5        | 9.16E-24  |
| Q9BTD8-1   | RNA-binding motif protein 42                                                  | RBM42     | 1.00     | 0.99     | 1.20     | 0.83     | 1.06       | 0.12 | 4        | 11         | 2.93E-67  |
| P62310     | U6 snRNA-associated Sm-like protein LSm3                                      | LSM3      | 1.16     | 1.11     | 0.92     | 1.09     | 1.06       | 0.13 | 3        | 22         | 5.73E-14  |
| P39656     | Dolichyl-diphosphooligosaccharide--protein glycosyltransferase 48 kDa subunit | DDOST     | 1.06     | 1.21     | 0.92     | 1.09     | 1.06       | 0.15 | 10       | 34         | 1.28E-81  |
| Q13112     | Chromatin assembly factor 1 subunit B                                         | CAF1A     | 1.10     | 1.19     | 0.90     | 1.11     | 1.06       | 0.15 | 5        | 11         | 1.35E-29  |
| B7WP27     | Putative uncharacterized protein CWC22                                        | CWC22     | 0.98     | 0.97     | 1.24     | 0.81     | 1.06       | 0.15 | 9        | 12         | 1.59E-152 |
| Q8TAT6-2   | Nuclear protein localization protein 4 homolog                                | KIAA1499  | 0.84     | 1.15     | 1.20     | 0.83     | 1.06       | 0.20 | 5        | 11         | 1.50E-113 |
| Q7Z6Z7-1   | ARF-binding protein 1                                                         | HSPC272   | 1.14     | 1.23     | 0.82     | 1.22     | 1.06       | 0.22 | 43       | 16         | 0.00E+00  |
| Q03701     | CCAAT/enhancer-binding protein zeta                                           | CBF2      | 1.08     | 1.27     | 0.84     | 1.19     | 1.06       | 0.22 | 6        | 8.7        | 3.10E-46  |
| Q9GZR7     | ATP-dependent RNA helicase DDX24                                              | DDX24     | 1.20     | 1.22     | 0.77     | 1.30     | 1.06       | 0.25 | 27       | 43         | 4.95E-160 |
| Q9H4A4     | Aminopeptidase B                                                              | APB       | 1.29     | 1.13     | 0.77     | 1.30     | 1.06       | 0.27 | 3        | 7.6        | 1.63E-44  |
| Q8N8A6     | ATP-dependent RNA helicase DDX51                                              | DDX51     | 1.26     | 1.24     | 0.69     | 1.45     | 1.06       | 0.32 | 7        | 16         | 2.40E-23  |

| UniProt ID | Protein_Name                                                           | Gene Name | F1 (L/H) | F2 (L/H) | R1 (H/L) | R1 (L/H) | Mean (T/U) | S.D. | Pep. No. | %Seq. Cov. | PEP       |
|------------|------------------------------------------------------------------------|-----------|----------|----------|----------|----------|------------|------|----------|------------|-----------|
| P48634-1   | HLA-B-associated transcript 2                                          | BAT2      | 1.26     | 1.26     | 0.67     | 1.49     | 1.06       | 0.34 | 22       | 16         | 4.70E-125 |
| Q9H4L7-2   | ATP-dependent helicase 1                                               | KIAA1122  | 0.89     | 1.47     | 0.83     | 1.20     | 1.06       | 0.35 | 3        | 4.1        | 2.05E-20  |
| A8MUW5     | Putative uncharacterized protein FAM98B                                | FAM98B    | 1.04     | 1.04     | 1.11     | 0.90     | 1.06       | 0.04 | 8        | 26         | 8.20E-110 |
| Q56VL3-1   | OCIA domain-containing protein 2                                       | OCIAD2    | 1.00     | 1.12     | 1.07     | 0.93     | 1.06       | 0.06 | 4        | 39         | 2.20E-19  |
| P07237     | Cellular thyroid hormone-binding protein                               | ERBA2L    | 1.11     | 1.09     | 0.99     | 1.01     | 1.06       | 0.06 | 28       | 60         | 1.11E-225 |
| O00232     | 26S proteasome non-ATPase regulatory subunit 12                        | PSMD12    | 1.12     | 1.08     | 0.99     | 1.01     | 1.06       | 0.07 | 12       | 30         | 1.23E-122 |
| P27816-1   | Microtubule-associated protein 4                                       | MAP4      | 0.95     | 1.13     | 1.11     | 0.90     | 1.06       | 0.10 | 28       | 32         | 2.08E-181 |
| Q8N1K5-1   | Protein THEMIS                                                         | C6orf190  | 1.11     | 1.25     | 0.83     | 1.20     | 1.06       | 0.21 | 5        | 8.2        | 1.91E-19  |
| Q8ND04-2   | Amplified in breast cancer gene 2 protein                              | ABC2      | 1.09     |          | 1.04     | 0.96     | 1.07       | 0.04 | 3        | 5          | 7.47E-89  |
| P40121     | Actin regulatory protein CAP-G                                         | AFCP      | 1.09     |          | 1.04     | 0.96     | 1.07       | 0.04 | 22       | 53         | 0.00E+00  |
| Q9HC35     | Echinoderm microtubule-associated protein-like 4                       | C2orf2    | 1.02     | 1.11     |          |          | 1.07       | 0.06 | 3        | 3.6        | 1.80E-06  |
| Q9UKA9-2   | Neural polypyrimidine tract-binding protein                            | NPTB      |          | 1.01     | 1.12     | 0.89     | 1.07       | 0.08 | 2        | 7.1        | 1.19E-12  |
| Q13616     | Cullin-1                                                               | CUL1      |          | 1.15     | 0.98     | 1.02     | 1.07       | 0.12 | 4        | 5.8        | 2.36E-38  |
| Q9NTM9     | Copper homeostasis protein cutC homolog                                | CGI-32    |          | 0.92     | 1.21     | 0.83     | 1.07       | 0.21 | 2        | 11         | 1.87E-31  |
| Q04721     | Neurogenic locus notch homolog protein 2                               | NOTCH2    | 0.91     |          | 1.22     | 0.82     | 1.07       | 0.22 | 2        | 1.1        | 3.02E-04  |
| B4DZK0     | cDNA FLJ56391, highly similar to Cysteine protease ATG4B (EC 3.4.22.-) | APG4B     | 1.23     |          | 0.90     | 1.11     | 1.07       | 0.23 | 2        | 7.1        | 4.26E-49  |
| Q9BVQ7-1   | Spermatogenesis-associated protein 5-like protein 1                    | SPATA5L1  | 1.24     |          | 0.89     | 1.12     | 1.07       | 0.25 | 5        | 13         | 4.62E-86  |
| Q6DKI1     | 60S ribosomal protein L7-like 1                                        | RPL7L1    | 1.31     |          | 0.82     | 1.22     | 1.07       | 0.35 | 3        | 15         | 1.37E-20  |
| Q6S8J3-1   | ANKRD26-like family C member 1A                                        | A26C1A    |          | 1.32     | 0.81     | 1.23     | 1.07       | 0.36 | 11       | 11         | 9.96E-271 |
| Q9Y570-1   | Protein phosphatase methylesterase 1                                   | PME1      | 1.06     | 1.05     | 1.09     | 0.92     | 1.07       | 0.02 | 6        | 20         | 2.68E-33  |
| Q99436     | Macropain chain Z                                                      | PSMB7     | 1.05     | 1.11     | 1.04     | 0.96     | 1.07       | 0.04 | 8        | 38         | 6.30E-148 |
| Q99714-1   | 17-beta-hydroxysteroid dehydrogenase 10                                | ERAB      | 1.03     | 1.06     | 1.11     | 0.90     | 1.07       | 0.04 | 16       | 86         | 0.00E+00  |

| UniProt ID | Protein_Name                                                                                     | Gene Name | F1 (L/H) | F2 (L/H) | R1 (H/L) | R1 (L/H) | Mean (T/U) | S.D. | Pep. No. | %Seq. Cov. | PEP       |
|------------|--------------------------------------------------------------------------------------------------|-----------|----------|----------|----------|----------|------------|------|----------|------------|-----------|
| Q9BVC6     | Mitsugumin-23                                                                                    | TMEM109   | 1.08     | 1.12     | 1.00     | 1.00     | 1.07       | 0.06 | 6        | 25         | 2.90E-42  |
| B4DP80     | cDNA FLJ56357, highly similar to Homo sapiens apolipoprotein A-I binding protein (APOA1BP), mRNA | AIBP      | 1.16     | 1.00     | 1.04     | 0.96     | 1.07       | 0.08 | 8        | 36         | 1.29E-110 |
| P98175-1   | G patch domain-containing protein 9                                                              | DXS8237E  | 1.00     | 1.02     | 1.18     | 0.85     | 1.07       | 0.10 | 13       | 19         | 1.06E-55  |
| Q8N9T8-1   | Protein KRI1 homolog                                                                             | KRI1      | 1.03     | 1.19     | 0.98     | 1.02     | 1.07       | 0.11 | 6        | 9.6        | 2.20E-164 |
| P52756-1   | Protein G15                                                                                      | H37       | 1.14     | 1.12     | 0.94     | 1.06     | 1.07       | 0.11 | 4        | 7.6        | 1.38E-16  |
| Q9Y5K6     | Adapter protein CMS                                                                              | CD2AP     | 1.20     | 1.01     | 0.99     | 1.01     | 1.07       | 0.12 | 7        | 13         | 8.18E-27  |
| Q14166     | Tubulin--tyrosine ligase-like protein 12                                                         | KIAA0153  | 1.10     | 1.17     | 0.93     | 1.08     | 1.07       | 0.12 | 13       | 35         | 2.22E-152 |
| Q9Y383-1   | Putative RNA-binding protein Luc7-like 2                                                         | LUC7L2    | 0.98     | 1.01     | 1.21     | 0.83     | 1.07       | 0.13 | 15       | 35         | 3.67E-113 |
| P61026     | Ras-related protein Rab-10                                                                       | RAB10     | 1.07     | 1.23     | 0.90     | 1.11     | 1.07       | 0.17 | 7        | 32         | 1.10E-80  |
| P23526     | Adenosylhomocysteinase                                                                           | AHCY      | 1.12     | 1.21     | 0.87     | 1.15     | 1.07       | 0.18 | 15       | 31         | 8.55E-83  |
| Q3ZCQ8-2   | Mitochondrial import inner membrane translocase subunit TIM50                                    | PRO1512   | 1.15     | 1.21     | 0.84     | 1.19     | 1.07       | 0.20 | 9        | 25         | 1.99E-95  |
| P52701-1   | DNA mismatch repair protein Msh6                                                                 | GTBP      | 1.17     | 1.21     | 0.82     | 1.22     | 1.07       | 0.21 | 10       | 9.9        | 1.53E-48  |
| B7Z3P1     | cDNA FLJ59210, highly similar to Tubulin-specific chaperone E                                    | TBCE      | 1.35     | 0.9      | 0.95     | 1.05     | 1.07       | 0.25 | 8        | 20         | 3.13E-41  |
| Q96G46-1   | tRNA-dihydrouridine synthase 3-like                                                              | DUS3L     | 1.23     | 1.21     | 0.76     | 1.32     | 1.07       | 0.27 | 10       | 24         | 1.40E-102 |
| Q15014     | MORF-related gene X protein                                                                      | KIAA0026  | 1.16     | 1.29     | 0.75     | 1.33     | 1.07       | 0.28 | 4        | 19         | 5.24E-15  |
| Q9ULX6     | A-kinase anchor protein 8-like                                                                   | AKAP8L    | 1.11     | 0.75     | 1.34     | 0.75     | 1.07       | 0.30 | 3        | 6.2        | 3.57E-16  |
| Q96P11-2   | NOL1/NOP2/Sun domain family member 5                                                             | NSUN5     | 1.45     | 0.95     | 0.80     | 1.25     | 1.07       | 0.34 | 5        | 14         | 4.43E-13  |
| Q9H267     | Vacuolar protein sorting-associated protein 33B                                                  | VPS33B    | 0.95     | 0.78     | 1.47     | 0.68     | 1.07       | 0.36 | 2        | 3.7        | 3.71E-05  |
| Q9UBP6     | Methyltransferase-like protein 1                                                                 | C12orf1   | 1.26     | 1.30     | 0.64     | 1.56     | 1.07       | 0.37 | 4        | 14         | 7.77E-70  |
| Q8IUE6     | Histone H2A type 2-B                                                                             | HIST2H2AB | 0.81     | 0.74     | 1.65     | 0.61     | 1.07       | 0.51 | 9        | 66         | 5.93E-244 |
| Q96A26     | E2-induced gene 5 protein                                                                        | C3orf28   | 0.99     | 1.15     |          |          | 1.07       | 0.11 | 2        | 12         | 1.04E-04  |
| Q9UJV      | DEAD box protein 41                                                                              | ABS       | 0.99     | 1.15     |          |          | 1.07       | 0.11 | 3        | 6.9        | 1.39E-32  |



| UniProt ID | Protein_Name                                                                                                       | Gene Name             | F1 (L/H) | F2 (L/H) | R1 (H/L) | R1 (L/H) | Mean (T/U) | S.D. | Pep. No. | %Seq. Cov. | PEP       |
|------------|--------------------------------------------------------------------------------------------------------------------|-----------------------|----------|----------|----------|----------|------------|------|----------|------------|-----------|
| 9          |                                                                                                                    |                       |          |          |          |          |            |      |          |            |           |
| Q16540     | 39S ribosomal protein L23, mitochondrial                                                                           | L23MRP                | 0.76     |          | 1.38     | 0.72     | 1.07       | 0.44 | 3        | 31         | 5.86E-22  |
| O75865-2   | Trafficking protein particle complex subunit 6A                                                                    | HSPC289               | 1.07     | 1.07     | 1.07     | 0.93     | 1.07       | 0.00 | 2        | 24         | 1.13E-12  |
| Q9Y5Y5-2   | Peroxin-16                                                                                                         | PEX16                 | 1.07     | 1.07     | 1.07     | 0.93     | 1.07       | 0.00 | 2        | 5.5        | 1.36E-02  |
| Q9BUE0     | Mediator complex subunit 18                                                                                        | MED18                 | 1.07     | 1.07     | 1.07     | 0.93     | 1.07       | 0.00 | 3        | 17         | 4.01E-05  |
| Q9UNX3     | 60S ribosomal protein L26-like 1                                                                                   | RPL26L1               | 1.07     | 1.07     | 1.07     | 0.93     | 1.07       | 0.00 | 11       | 50         | 1.26E-33  |
| Q9BV20-1   | Mediator of RhoA-dependent invasion                                                                                | MRDI                  | 1.08     | 1.07     | 1.06     | 0.94     | 1.07       | 0.01 | 2        | 6.2        | 1.76E-13  |
| Q9Y530     | Uncharacterized protein C6orf130                                                                                   | C6orf130              | 1.09     |          | 1.05     | 0.95     | 1.07       | 0.03 | 2        | 14         | 8.33E-05  |
| P20962     | Parathymosin                                                                                                       | PTMS                  | 1.09     |          | 1.05     | 0.95     | 1.07       | 0.03 | 2        | 14         | 7.18E-05  |
| A6NDY0-1   | Embryonic poly(A)-binding protein type II                                                                          | EPABP2                | 1.09     |          | 1.05     | 0.95     | 1.07       | 0.03 | 2        | 9.7        | 5.36E-03  |
| Q99611     | Selenide, water dikinase 2                                                                                         | SEPHS2                | 1.09     |          | 1.05     | 0.95     | 1.07       | 0.03 | 2        | 7.5        | 6.34E-06  |
| Q9ULJ3     | Zinc finger and BTB domain-containing protein 21                                                                   | KIAA1227              | 1.09     |          | 1.05     | 0.95     | 1.07       | 0.03 | 4        | 7.1        | 2.50E-19  |
| O95036     | Similar to 60S ribosomal protein L7                                                                                | WUGS C:H_R G054D 04.1 | 1.09     |          | 1.05     | 0.95     | 1.07       | 0.03 | 18       | 46         | 1.12E-177 |
| Q16666-1   | Gamma-interferon-inducible protein 16                                                                              | IFI16                 | 1.1      | 1.09     | 1.02     | 0.98     | 1.07       | 0.04 | 21       | 28         | 2.01E-185 |
| B4E1T7     | cDNA FLJ58665, highly similar to Serine/threonine-protein phosphatase 2A 55 kDa regulatory subunit B alpha isoform | PPP2R2A               | 1.05     | 1.12     | 1.04     | 0.96     | 1.07       | 0.04 | 8        | 21         | 4.20E-269 |
| Q9NRD1     | F-box only protein 6                                                                                               | FBG2                  | 1.02     | 1.11     | 1.08     | 0.93     | 1.07       | 0.05 | 2        | 12         | 1.21E-23  |
| P49411     | Elongation factor Tu, mitochondrial                                                                                | TUFM                  | 1.10     | 1.10     | 1.01     | 0.99     | 1.07       | 0.05 | 19       | 50         | 9.65E-185 |
| Q8IX12-1   | Cell cycle and apoptosis regulatory protein 1                                                                      | CARP1                 | 1.08     | 1.15     | 0.98     | 1.02     | 1.07       | 0.09 | 11       | 11         | 7.32E-95  |
| Q8WX A9-2  | Serine/arginine-rich-splicing regulatory protein 86                                                                | SFRS12                | 0.97     | 1.11     | 1.13     | 0.88     | 1.07       | 0.09 | 7        | 16         | 4.15E-77  |
| Q8NFW8-1   | CMP-N-acetylneuraminic acid synthase                                                                               | CMAS                  | 1.16     | 0.98     | 1.07     | 0.93     | 1.07       | 0.09 | 4        | 11         | 5.10E-25  |
| O75746     | Calcium-binding mitochondrial carrier protein Aralar1                                                              | ARAL AR1              | 1.13     | 0.96     | 1.12     | 0.89     | 1.07       | 0.10 | 6        | 9.6        | 2.12E-30  |

| UniProt ID | Protein_Name                                                                 | Gene Name | F1 (L/H) | F2 (L/H) | R1 (H/L) | R1 (L/H) | Mean (T/U) | S.D. | Pep. No. | %Seq. Cov. | PEP       |
|------------|------------------------------------------------------------------------------|-----------|----------|----------|----------|----------|------------|------|----------|------------|-----------|
| P30419-1   | Glycylpeptide N-tetradecanoyltransferase 1                                   | NMT1      | 1.07     | 1.17     | 0.97     | 1.03     | 1.07       | 0.10 | 8        | 22         | 7.08E-106 |
| Q9BS26     | Endoplasmic reticulum resident protein 44                                    | ERP44     | 1.10     | 1.20     | 0.91     | 1.10     | 1.07       | 0.15 | 6        | 19         | 1.90E-85  |
| P53618     | Beta-coat protein                                                            | COPB      | 1.21     | 1.11     | 0.89     | 1.12     | 1.07       | 0.16 | 17       | 24         | 2.26E-191 |
| Q6IN85-1   | Serine/threonine-protein phosphatase 4 regulatory subunit 3A                 | KIAA2010  | 1.24     | 1.06     | 0.91     | 1.10     | 1.07       | 0.17 | 7        | 14         | 1.51E-37  |
| O43488     | AFB1 aldehyde reductase 1                                                    | AFAR      | 0.93     | 1.01     | 1.27     | 0.79     | 1.07       | 0.18 | 5        | 18         | 8.05E-73  |
| B7ZM99     | Methylenetetrahydrofolate dehydrogenase (NADP+ dependent) 1-like             | MTHFD1L   | 1.19     | 1.21     | 0.81     | 1.23     | 1.07       | 0.23 | 19       | 23         | 1.58E-120 |
| P43490     | Nicotinamide phosphoribosyltransferase                                       | NAMPT     | 1.09     | 1.31     | 0.81     | 1.23     | 1.07       | 0.25 | 9        | 28         | 1.62E-132 |
| Q6IAA8     | p27Kip1-releasing factor from RhoA                                           | C11orf59  | 0.89     | 1.25     |          |          | 1.07       | 0.25 | 3        | 34         | 1.06E-76  |
| Q12873-1   | ATP-dependent helicase CHD3                                                  | CHD3      | 1.11     | 1.31     | 0.79     | 1.27     | 1.07       | 0.26 | 10       | 9.6        | 4.90E-88  |
| Q8TDN6     | Brix domain-containing protein 2                                             | BRIX      | 1.19     | 1.30     | 0.72     | 1.39     | 1.07       | 0.31 | 7        | 30         | 3.09E-21  |
| O00541-1   | Pescadillo homolog                                                           | PES1      | 1.33     | 1.17     | 0.71     | 1.41     | 1.07       | 0.32 | 12       | 22         | 1.05E-48  |
| Q9Y2V2     | Calcium-regulated heat stable protein 1                                      | CARHSP1   | 0.84     |          | 1.30     | 0.77     | 1.07       | 0.33 | 3        | 26         | 3.27E-32  |
| B4DWA0     | cDNA FLJ54188, moderately similar to High mobility group protein HMG-I/HMG-Y | HMGA1     | 1.31     | 1.26     | 0.64     | 1.56     | 1.07       | 0.37 | 3        | 10         | 4.81E-21  |
| Q07065-1   | 63 kDa membrane protein                                                      | CKAP4     | 0.66     | 0.79     | 1.76     | 0.57     | 1.07       | 0.60 | 6        | 14         | 1.17E-84  |
| O60281     | Zinc finger protein 292                                                      | KIAA0530  |          |          | 1.07     | 0.93     | 1.07       |      | 2        | 0.8        | 5.70E-02  |
| Q96RL1-1   | BRCA1-A complex subunit RAP80                                                | RAP80     |          |          | 1.07     | 0.93     | 1.07       |      | 2        | 4          | 1.01E-14  |
| B4DRD7     | cDNA FLJ54752, highly similar to Poly(rC)-binding protein 2                  | PCBP2     |          |          | 1.07     | 0.93     | 1.07       |      | 13       | 71         | 7.48E-269 |
| B2RE77     | cDNA, FLJ95224, Homo sapiens proline rich 3 (PRR3), mRNA                     | CAT56     | 1.07     |          |          |          | 1.07       |      | 2        | 15         | 2.33E-07  |
| P02792     | Ferritin light chain                                                         | FTL       | 1.07     |          |          |          | 1.07       |      | 2        | 17         | 1.04E-19  |
| Q9BWH2     | Cervical cancer proto-oncogene 3 protein                                     | DC44      |          | 1.07     |          |          | 1.07       |      | 3        | 16         | 5.98E-06  |
| P55081     | Microfibrillar-associated protein 1                                          | MFAP1     | 1.13     | 1.17     | 0.92     | 1.09     | 1.07       | 0.13 | 6        | 15         | 4.43E-50  |
| B4DKS      | cDNA FLJ53381,                                                               | MCT1      | 1.14     | 1.24     | 0.84     | 1.19     | 1.07       | 0.21 | 5        | 11         | 6.88E-36  |

| UniProt ID | Protein_Name                                      | Gene Name  | F1 (L/H) | F2 (L/H) | R1 (H/L) | R1 (L/H) | Mean (T/U) | S.D. | Pep. No. | %Seq. Cov. | PEP       |
|------------|---------------------------------------------------|------------|----------|----------|----------|----------|------------|------|----------|------------|-----------|
| 0          | highly similar to Monocarboxylate transporter 1   |            |          |          |          |          |            |      |          |            |           |
| Q69YN4-1   | Protein virilizer homolog                         | KIAA1429   | 1.14     | 1.26     | 0.82     | 1.22     | 1.07       | 0.23 | 2        | 1.5        | 1.44E-19  |
| O00267-1   | DRB sensitivity-inducing factor 160 kDa subunit   | SPT5       | 1.19     | 1.24     | 0.79     | 1.27     | 1.07       | 0.25 | 12       | 15         | 6.25E-49  |
| Q13206     | DEAD box protein 10                               | DDX10      | 1.07     | 1.35     | 0.80     | 1.25     | 1.07       | 0.28 | 7        | 13         | 4.73E-80  |
| Q9NPF4     | Probable O-sialoglycoprotein endopeptidase        | GCPL1      | 1.23     | 1.25     | 0.74     | 1.35     | 1.07       | 0.29 | 4        | 19         | 2.33E-86  |
| P62316     | Small nuclear ribonucleoprotein Sm D2             | SNRPD2     | 1.10     | 1.06     | 1.06     | 0.94     | 1.07       | 0.02 | 9        | 55         | 3.58E-181 |
| P22626-1   | Heterogeneous nuclear ribonucleoproteins A2/B1    | HNRNP A2B1 | 1.04     | 1.07     | 1.11     | 0.90     | 1.07       | 0.04 | 28       | 74         | 0.00E+00  |
| A8MYH0     | Lissencephaly-1 protein                           | LIS1       | 0.99     | 1.11     | 1.12     | 0.89     | 1.07       | 0.07 | 3        | 11         | 5.44E-18  |
| P49755     | 21 kDa transmembrane-trafficking protein          | TMED10     | 1.15     | 1.09     | 0.98     | 1.02     | 1.07       | 0.09 | 8        | 41         | 7.27E-55  |
| O60885-1   | Bromodomain-containing protein 4                  | BRD4       | 1.09     | 1.15     | 0.98     | 1.02     | 1.07       | 0.09 | 9        | 8.2        | 1.65E-27  |
| Q7Z4W1     | Carbonyl reductase II                             | DCXR       | 1.06     | 0.97     | 1.19     | 0.84     | 1.07       | 0.11 | 11       | 55         | 1.38E-42  |
| P56537     | B(2)GCN homolog                                   | EIF6       | 0.95     | 1.21     | 1.06     | 0.94     | 1.07       | 0.13 | 8        | 56         | 1.80E-143 |
| P10809     | 60 kDa chaperonin                                 | HSP60      | 1.15     | 1.18     | 0.89     | 1.12     | 1.07       | 0.16 | 51       | 81         | 0.00E+00  |
| Q13136-1   | LAR-interacting protein 1                         | LIP1       | 0.85     | 1.27     | 1.10     | 0.91     | 1.07       | 0.21 | 6        | 6.7        | 8.23E-24  |
| Q6P1K2-1   | Polyamine-modulated factor 1                      | PMF1       | 1.16     | 0.99     |          |          | 1.08       | 0.12 | 3        | 18         | 4.49E-14  |
| Q96M27-2   | Protein PRRC1                                     | PRRC1      |          | 0.83     | 1.32     | 0.76     | 1.08       | 0.35 | 2        | 7.1        | 1.53E-51  |
| Q96HA1-1   | Nuclear envelope pore membrane protein POM 121    | KIAA0618   | 1.06     |          | 1.09     | 0.92     | 1.08       | 0.02 | 2        | 3.1        | 1.39E-13  |
| Q9BQE3     | Alpha-tubulin 6                                   | TUBA1C     | 1.04     |          | 1.11     | 0.90     | 1.08       | 0.05 | 32       | 73         | 0.00E+00  |
| Q9H7P6-1   | ESCRT-I complex subunit MVB12B                    | C9orf28    |          | 1.03     | 1.12     | 0.89     | 1.08       | 0.06 | 3        | 16         | 3.04E-14  |
| Q99549-2   | M-phase phosphoprotein 8                          | MPHOSPH8   | 1.34     |          | 0.81     | 1.23     | 1.08       | 0.37 | 2        | 3.6        | 4.13E-05  |
| B4DRY5     | cDNA FLJ54538, highly similar to Transportin-2    | TNPO2      | 0.94     | 1.07     | 1.22     | 0.82     | 1.08       | 0.14 | 9        | 11         | 1.51E-31  |
| Q96CP2     | FLYWCH family member 2                            | FLYWCH2    | 1.17     | 1.22     | 0.84     | 1.19     | 1.08       | 0.21 | 3        | 30         | 4.49E-08  |
| O00330     | Dihydrolipoamide dehydrogenase-binding protein of | PDHX       | 0.83     | 1.01     | 1.39     | 0.72     | 1.08       | 0.29 | 4        | 11         | 3.53E-07  |

| UniProt ID | Protein_Name                                 | Gene Name | F1 (L/H) | F2 (L/H) | R1 (H/L) | R1 (L/H) | Mean (T/U) | S.D. | Pep. No. | %Seq. Cov. | PEP       |
|------------|----------------------------------------------|-----------|----------|----------|----------|----------|------------|------|----------|------------|-----------|
|            | pyruvate dehydrogenase complex               |           |          |          |          |          |            |      |          |            |           |
| P38646     | 75 kDa glucose-regulated protein             | GRP75     | 1.12     | 1.15     | 0.96     | 1.04     | 1.08       | 0.10 | 38       | 57         | 0.00E+00  |
| Q14139-2   | Ubiquitin conjugation factor E4 A            | KIAA0126  | 1.01     | 1.20     | 1.02     | 0.98     | 1.08       | 0.11 | 7        | 8.1        | 5.59E-98  |
| Q13162     | Antioxidant enzyme AOE372                    | PRDX4     | 1.16     | 1.18     | 0.89     | 1.12     | 1.08       | 0.16 | 10       | 49         | 1.43E-44  |
| P84077     | ADP-ribosylation factor 1                    | ARF1      | 1.22     | 1.12     | 0.89     | 1.12     | 1.08       | 0.17 | 9        | 58         | 2.25E-129 |
| Q14690     | NF-kappa-B-binding protein                   | KIAA0185  | 1.09     | 1.24     | 0.90     | 1.11     | 1.08       | 0.17 | 11       | 7.5        | 2.20E-67  |
| P16104     | Histone H2A.x                                | H2AFX     | 0.98     | 0.95     | 1.30     | 0.77     | 1.08       | 0.19 | 10       | 62         | 0.00E+00  |
| Q9UIJ7     | Adenylate kinase 3                           | AK3       | 0.95     | 0.96     | 1.32     | 0.76     | 1.08       | 0.21 | 9        | 39         | 2.16E-111 |
| P62314     | Small nuclear ribonucleoprotein Sm D1        | SNRPD1    | 1.21     | 1.20     | 0.82     | 1.22     | 1.08       | 0.22 | 3        | 28         | 1.01E-65  |
| Q02543     | 60S ribosomal protein L18a                   | RPL18A    | 1.29     | 1.23     | 0.71     | 1.41     | 1.08       | 0.32 | 13       | 53         | 2.57E-86  |
| P22102-1   | 5-phosphoribosylglycine amide transformylase | GART      | 1.23     | 1.29     | 0.71     | 1.41     | 1.08       | 0.32 | 31       | 42         | 4.46E-257 |
| Q9P258     | Protein RCC2                                 | KIAA1470  | 1.09     | 1.11     | 1.03     | 0.97     | 1.08       | 0.04 | 23       | 46         | 4.65E-114 |
| Q9NZI8     | Coding region determinant-binding protein    | CRDBP     | 1.06     | 1.01     | 1.16     | 0.86     | 1.08       | 0.08 | 11       | 24         | 2.68E-173 |
| Q96HS1-1   | Bcl-XL-binding protein v68                   | PGAM5     | 1.18     | 1.27     | 0.78     | 1.28     | 1.08       | 0.26 | 13       | 50         | 1.80E-75  |
| Q96ER9-1   | Coiled-coil domain-containing protein 51     | CCDC51    | 1.17     | 1.09     | 0.98     | 1.02     | 1.08       | 0.10 | 3        | 10         | 1.02E-15  |
| Q4KMP7-2   | TBC1 domain family member 10B                | FP2461    | 1.22     | 1.08     | 0.94     | 1.06     | 1.08       | 0.14 | 4        | 10         | 2.19E-34  |
| Q6F5E8     | Leucine-rich repeat-containing protein 16C   | LRRC16C   | 1.26     | 1.21     | 0.77     | 1.30     | 1.08       | 0.27 | 9        | 9.8        | 7.47E-111 |
| P46777     | 60S ribosomal protein L5                     | MSTP030   | 1.24     | 1.27     | 0.73     | 1.37     | 1.08       | 0.30 | 17       | 48         | 1.75E-146 |
| Q9ULA0     | Aspartyl aminopeptidase                      | ASPEP     | 1.73     | 0.94     | 0.57     | 1.75     | 1.08       | 0.59 | 5        | 15         | 4.84E-27  |
| Q9BVC5     | Ashwin                                       | C2orf49   | 1.08     |          | 1.08     | 0.93     | 1.08       | 0.00 | 3        | 16         | 4.62E-08  |
| Q86WA6-1   | Biphenyl hydrolase-like protein              | BPHL      | 1.08     |          | 1.08     | 0.93     | 1.08       | 0.00 | 3        | 14         | 6.55E-25  |
| Q96BH1     | E3 ubiquitin-protein ligase RNF25            | RNF25     | 1.07     | 1.09     |          |          | 1.08       | 0.01 | 4        | 9.8        | 3.87E-77  |
| P63279     | p18                                          | UBC9      | 1.10     |          | 1.06     | 0.94     | 1.08       | 0.03 | 6        | 47         | 1.41E-65  |
| A8MXB9     | C-alpha-formylglycine-generating enzyme 2    | PSEC0171  | 1.10     |          | 1.06     | 0.94     | 1.08       | 0.03 | 13       | 42         | 1.36E-149 |
| P09429     | High mobility group protein 1                | HMG1      | 1.08     | 1.12     | 1.04     | 0.96     | 1.08       | 0.04 | 19       | 56         | 3.12E-265 |

| UniProt ID | Protein_Name                                                                            | Gene Name | F1 (L/H) | F2 (L/H) | R1 (H/L) | R1 (L/H) | Mean (T/U) | S.D. | Pep. No. | %Seq. Cov. | PEP       |
|------------|-----------------------------------------------------------------------------------------|-----------|----------|----------|----------|----------|------------|------|----------|------------|-----------|
| Q9UMS4     | Nuclear matrix protein 200                                                              | NMP200    | 1.15     | 1.10     | 0.99     | 1.01     | 1.08       | 0.08 | 15       | 47         | 2.28E-119 |
| P17612-1   | cAMP-dependent protein kinase catalytic subunit alpha                                   | PKACA     | 1.02     |          | 1.14     | 0.88     | 1.08       | 0.08 | 11       | 35         | 2.46E-83  |
| P13674-2   | Procollagen-proline,2-oxoglutarate-4-dioxygenase subunit alpha-1                        | P4HA      |          | 1.02     | 1.14     | 0.88     | 1.08       | 0.08 | 12       | 30         | 4.40E-119 |
| Q9HCD5     | Coactivator independent of AF-2                                                         | KIAA1637  | 1.12     | 0.98     | 1.14     | 0.88     | 1.08       | 0.09 | 5        | 11         | 5.18E-46  |
| Q59GA1     | Splicing factor, arginine/serine-rich 10 (Transformer 2 homolog, Drosophila) variant    | SFRS10    | 1.02     | 1.02     | 1.20     | 0.83     | 1.08       | 0.10 | 9        | 36         | 1.44E-66  |
| Q9BTZ2-1   | Dehydrogenase/reductase SDR family member 4                                             | DHRS4     | 1.16     |          | 1.00     | 1.00     | 1.08       | 0.11 | 5        | 15         | 1.05E-11  |
| Q16134     | Electron transfer flavoprotein-ubiquinone oxidoreductase, mitochondrial                 | ETFDH     | 1.17     |          | 0.99     | 1.01     | 1.08       | 0.13 | 6        | 12         | 1.57E-115 |
| P05141     | Adenine nucleotide translocator 2                                                       | ANT2      | 1.19     |          | 0.97     | 1.03     | 1.08       | 0.16 | 11       | 33         | 1.84E-73  |
| B4DLH4     | cDNA FLJ53622, highly similar to Hematological and neurological expressed1-like protein | C16orf34  | 0.92     | 1.24     |          |          | 1.08       | 0.23 | 3        | 21         | 3.72E-22  |
| Q6NUL7     | SPTLC1 protein                                                                          | SPTLC1    | 1.25     |          | 0.91     | 1.10     | 1.08       | 0.24 | 3        | 10         | 1.55E-90  |
| P35270     | Sepiapterin reductase                                                                   | SPR       | 1.36     | 0.97     | 0.91     | 1.10     | 1.08       | 0.24 | 8        | 41         | 4.16E-182 |
| Q93045     | Stathmin-2                                                                              | SCG10     | 0.90     | 0.98     | 1.36     | 0.74     | 1.08       | 0.25 | 5        | 15         | 6.52E-37  |
| P13807     | Glycogen [starch] synthase, muscle                                                      | GYS       | 1.33     |          | 0.83     | 1.20     | 1.08       | 0.35 | 2        | 4.7        | 1.11E-15  |
| B4DHM0     | cDNA FLJ59687, highly similar to Secernin-1                                             | KIAA0193  | 0.82     | 0.80     | 1.62     | 0.62     | 1.08       | 0.47 | 3        | 9.2        | 1.47E-18  |
| A8K822     | cDNA FLJ7778, highly similar to Homo sapiens death-associated protein 6 (DAXX), mRNA    | BING2     | 1.43     |          | 0.73     | 1.37     | 1.08       | 0.49 | 2        | 4.9        | 2.11E-51  |
| B1AKJ7     | Oxysterol-binding protein                                                               | OSBPL9    |          |          | 1.08     | 0.93     | 1.08       |      | 2        | 3.2        | 3.42E-08  |
| Q9NRG0     | Chromatin accessibility complex 15 kDa protein                                          | CHRA C1   | 1.08     |          |          |          | 1.08       |      | 2        | 26         | 6.69E-05  |
| Q8IYQ7     | Threonine synthase-like 1                                                               | THNSL1    |          | 1.08     |          |          | 1.08       |      | 2        | 3.5        | 5.58E-12  |
| Q7Z7F0     | UPF0469 protein                                                                         | BLOM7     |          | 1.08     |          |          | 1.08       |      | 2        | 2.9        | 1.90E-03  |

| UniProt ID | Protein_Name                                                            | Gene Name   | F1 (L/H) | F2 (L/H) | R1 (H/L) | R1 (L/H) | Mean (T/U) | S.D. | Pep. No. | %Seq. Cov. | PEP       |
|------------|-------------------------------------------------------------------------|-------------|----------|----------|----------|----------|------------|------|----------|------------|-----------|
| -1         | KIAA0907                                                                |             |          |          |          |          |            |      |          |            |           |
| A4D0Z6     | Inosine-5-monophosphate dehydrogenase                                   | IMPDH1      |          | 1.08     |          |          | 1.08       |      | 3        | 7.2        | 9.85E-10  |
| A8MSU4     | Putative uncharacterized protein HPRT1                                  | HPRT1       |          | 1.08     |          |          | 1.08       |      | 4        | 21         | 1.49E-56  |
| B2RU10     | EIF4G1 protein                                                          | EIF4G1      |          | 1.08     |          |          | 1.08       |      | 41       | 21         | 0.00E+00  |
| Q00839-1   | Heterogeneous nuclear ribonucleoprotein U                               | HNRNP U     | 1.07     | 1.1      | 1.08     | 0.93     | 1.08       | 0.02 | 45       | 47         | 0.00E+00  |
| P51659     | 17-beta-hydroxysteroid dehydrogenase 4                                  | EDH17B4     | 1.12     | 1.10     | 1.03     | 0.97     | 1.08       | 0.05 | 11       | 23         | 4.77E-130 |
| P20339     | Ras-related protein Rab-5A                                              | RAB5        | 1.02     | 1.09     | 1.14     | 0.88     | 1.08       | 0.06 | 9        | 60         | 2.61E-121 |
| Q9Y2H0-2   | Disks large-associated protein 4                                        | DAP4        | 1.04     | 1.04     | 1.17     | 0.85     | 1.08       | 0.08 | 3        | 4.9        | 7.14E-14  |
| P10319     | Bw-58                                                                   | HLA-B       | 1.15     | 0.95     | 1.15     | 0.87     | 1.08       | 0.12 | 8        | 28         | 1.15E-89  |
| Q5QPK0     | Dolichyl-phosphate mannosyltransferase polypeptide 1, catalytic subunit | DPM1        | 0.95     | 1.09     | 1.21     | 0.83     | 1.08       | 0.13 | 3        | 17         | 1.62E-32  |
| P39023     | 60S ribosomal protein L3                                                | OK/SW-cl.32 | 1.18     | 1.24     | 0.83     | 1.20     | 1.08       | 0.22 | 15       | 39         | 1.20E-109 |
| P18085     | ADP-ribosylation factor 4                                               | ARF2        | 1.24     | 1.20     | 0.81     | 1.23     | 1.08       | 0.24 | 7        | 51         | 8.17E-67  |
| Q01813     | 6-phosphofructokinase type C                                            | PFKF        | 1.19     | 1.26     | 0.80     | 1.25     | 1.08       | 0.25 | 23       | 36         | 0.00E+00  |
| Q13151     | Heterogeneous nuclear ribonucleoprotein A0                              | HNRNP A0    | 0.91     | 0.96     | 1.38     | 0.72     | 1.08       | 0.26 | 15       | 51         | 1.92E-218 |
| Q9NYP9     | FAPP1-associated protein 1                                              | C21orf45    | 0.89     | 0.98     | 1.38     | 0.72     | 1.08       | 0.26 | 5        | 33         | 2.94E-13  |
| P17480-1   | Autoantigen NOR-90                                                      | UBF         | 0.91     | 0.93     | 1.41     | 0.71     | 1.08       | 0.28 | 24       | 32         | 2.01E-171 |
| P20042     | Eukaryotic translation initiation factor 2 subunit 2                    | EIF2B       | 1.20     | 1.30     | 0.75     | 1.33     | 1.08       | 0.29 | 14       | 38         | 4.84E-288 |
| Q9NYL4     | 19 kDa FK506-binding protein                                            | FKBP11      | 1.30     | 1.22     | 0.73     | 1.37     | 1.08       | 0.31 | 3        | 18         | 2.05E-34  |
| Q9BJW5     | Pre-mRNA-splicing factor SF3b 10 kDa subunit                            | SF3B10      | 1.00     | 1.43     | 0.82     | 1.22     | 1.08       | 0.31 | 3        | 40         | 1.06E-38  |
| Q96PU8-4   | Protein quaking                                                         | HKQ         | 1.72     | 0.74     | 0.79     | 1.27     | 1.08       | 0.55 | 2        | 7.7        | 1.43E-07  |
| P52597     | Heterogeneous nuclear ribonucleoprotein F                               | HNRNP F     | 1.11     | 1.12     | 1.02     | 0.98     | 1.08       | 0.06 | 13       | 55         | 0.00E+00  |
| P32942     | CDw50                                                                   | ICAM3       | 1.10     |          | 1.07     | 0.93     | 1.09       | 0.02 | 5        | 11         | 6.30E-39  |
| Q12981-4   | BCL2/adenovirus E1B 19 kDa protein-interacting protein 1                | BNIP1       | 1.01     | 1.16     |          |          | 1.09       | 0.11 | 3        | 12         | 2.64E-05  |
| A8K654     | cDNA FLJ75178, highly similar to                                        | CXXC3       | 1.20     |          | 0.97     | 1.03     | 1.09       | 0.16 | 2        | 4          | 2.93E-09  |

| UniProt ID | Protein_Name                                                                                                                      | Gene Name | F1 (L/H) | F2 (L/H) | R1 (H/L) | R1 (L/H) | Mean (T/U) | S.D. | Pep. No. | %Seq. Cov. | PEP       |
|------------|-----------------------------------------------------------------------------------------------------------------------------------|-----------|----------|----------|----------|----------|------------|------|----------|------------|-----------|
|            | Homo sapiens methyl-CpG binding protein splice variant 1 (MBD1) mRNA                                                              |           |          |          |          |          |            |      |          |            |           |
| O60613-1   | 15 kDa selenoprotein                                                                                                              | 41167     | 0.96     |          | 1.21     | 0.83     | 1.09       | 0.18 | 2        | 15         | 2.29E-27  |
| Q86X76-3   | Nitrilase homolog 1                                                                                                               | NIT1      | 1.10     | 1.01     | 1.15     | 0.87     | 1.09       | 0.07 | 6        | 19         | 1.58E-29  |
| Q15286     | GTP-binding protein RAY                                                                                                           | RAB1C     | 1.01     | 1.08     | 1.17     | 0.85     | 1.09       | 0.08 | 6        | 40         | 1.46E-46  |
| Q92621     | 205 kDa nucleoporin                                                                                                               | C7orf14   | 0.98     | 1.13     | 1.15     | 0.87     | 1.09       | 0.09 | 9        | 6.5        | 9.45E-116 |
| Q15437     | Protein transport protein Sec23B                                                                                                  | SEC23B    | 1.16     | 1.12     | 0.98     | 1.02     | 1.09       | 0.09 | 9        | 17         | 1.07E-64  |
| Q9Y5B9     | Chromatin-specific transcription elongation factor 140 kDa subunit                                                                | FACT140   | 1.14     | 1.15     | 0.97     | 1.03     | 1.09       | 0.10 | 31       | 32         | 1.19E-287 |
| P07900-2   | Heat shock 86 kDa                                                                                                                 | HSP90A    | 1.15     | 1.24     | 0.87     | 1.15     | 1.09       | 0.19 | 66       | 60         | 0.00E+00  |
| A8K3N2     | cDNA FLJ76264, highly similar to Homo sapiens mediator of RNA polymerase II transcription, subunit 6 homolog (yeast) (MED6), mRNA | ARC33     | 1.29     | 1.12     | 0.85     | 1.18     | 1.09       | 0.22 | 2        | 7.9        | 1.04E-06  |
| Q9UI12-1   | Nef-binding protein 1                                                                                                             | ATP6V1H   | 0.94     | 0.96     | 1.36     | 0.74     | 1.09       | 0.24 | 5        | 14         | 8.26E-17  |
| B9ZVP3     | DEAD (Asp-Glu-Ala-Asp) box polypeptide 54, isoform CRA_a                                                                          | DDX54     | 1.3      | 1.14     | 0.82     | 1.22     | 1.09       | 0.24 | 7        | 10         | 2.93E-42  |
| Q969V3-1   | Nicalin                                                                                                                           | NCLN      | 1.36     | 1.06     | 0.84     | 1.19     | 1.09       | 0.26 | 3        | 7.8        | 1.29E-12  |
| O60232     | Autoantigen p27                                                                                                                   | SSSCA1    | 1.44     | 1.20     | 0.62     | 1.61     | 1.09       | 0.42 | 7        | 50         | 1.66E-96  |
| O00411     | DNA-directed RNA polymerase, mitochondrial                                                                                        | POLRMT    | 1.32     | 1.39     | 0.55     | 1.82     | 1.09       | 0.47 | 8        | 10         | 7.88E-100 |
| Q96EK9     | Protein KTI12 homolog                                                                                                             | KTI12     | 1.15     |          | 1.03     | 0.97     | 1.09       | 0.08 | 2        | 10         | 1.91E-12  |
| P26196     | ATP-dependent RNA helicase p54                                                                                                    | DDX6      | 1.17     | 1.15     | 0.95     | 1.05     | 1.09       | 0.12 | 9        | 30         | 1.00E-110 |
| P0C0S5     | Histone H2A.Z                                                                                                                     | H2AFZ     | 0.99     | 1.23     | 1.05     | 0.95     | 1.09       | 0.12 | 6        | 38         | 1.11E-114 |
| A8MZI2     | Putative uncharacterized protein SAMM50                                                                                           | SAMM50    |          | 0.98     | 1.20     | 0.83     | 1.09       | 0.16 | 3        | 8.5        | 3.23E-26  |
| Q9H9A5-1   | CCR4-NOT transcription complex subunit 10                                                                                         | CNOT10    | 0.83     | 1.18     | 1.26     | 0.79     | 1.09       | 0.23 | 2        | 3          | 1.51E-09  |
| P54136-1   | Arginine--tRNA ligase                                                                                                             | RARS      | 1.27     | 1.20     | 0.80     | 1.25     | 1.09       | 0.25 | 18       | 33         | 1.79E-142 |
| P40926     | Malate                                                                                                                            | MDH2      | 1.03     | 1.12     | 1.12     | 0.89     | 1.09       | 0.05 | 18       | 61         | 0.00E+00  |

| UniProt ID | Protein_Name                                                                        | Gene Name        | F1 (L/H) | F2 (L/H) | R1 (H/L) | R1 (L/H) | Mean (T/U) | S.D. | Pep. No. | %Seq. Cov. | PEP       |
|------------|-------------------------------------------------------------------------------------|------------------|----------|----------|----------|----------|------------|------|----------|------------|-----------|
|            | dehydrogenase, mitochondrial                                                        |                  |          |          |          |          |            |      |          |            |           |
| Q8IYI6     | Exocyst complex 84 kDa subunit                                                      | EXOC8            | 0.98     | 1.04     | 1.25     | 0.80     | 1.09       | 0.14 | 4        | 12         | 1.54E-26  |
| Q96JP5-1   | Zinc finger protein 91 homolog                                                      | FKSG11           | 1.04     | 0.95     | 1.28     | 0.78     | 1.09       | 0.17 | 3        | 8.1        | 2.46E-33  |
| O00268     | RNA polymerase II TBP-associated factor subunit C                                   | TAF2C            |          | 0.92     | 1.26     | 0.79     | 1.09       | 0.24 | 4        | 4.4        | 2.13E-16  |
| Q9BQC3     | Diphthamide biosynthesis protein 2                                                  | DPH2             | 1.26     |          | 0.92     | 1.09     | 1.09       | 0.24 | 2        | 9          | 8.74E-08  |
| Q92696     | Geranylgeranyl transferase type II subunit alpha                                    | RABGTA           |          | 1.26     | 0.92     | 1.09     | 1.09       | 0.24 | 3        | 4.8        | 7.83E-06  |
| Q9GZR2     | Exonuclease XPMC2                                                                   | PMC2             |          |          | 1.09     | 0.92     | 1.09       |      | 2        | 4.7        | 1.42E-02  |
| Q5JT09     | Uridine kinase                                                                      | RP11-334J6.5-004 |          |          | 1.09     | 0.92     | 1.09       |      | 3        | 9.9        | 2.04E-05  |
| P78560     | Caspase and RIP adapter with death domain                                           | CRADD            | 1.09     |          |          |          | 1.09       |      | 2        | 16         | 3.12E-29  |
| O14893-1   | Component of gems 2                                                                 | GEMIN2           | 1.09     |          |          |          | 1.09       |      | 2        | 9.6        | 5.07E-08  |
| Q9UJ83     | 2-hydroxyacyl-CoA lyase 1                                                           | HACL1            |          | 1.09     |          |          | 1.09       |      | 2        | 3.6        | 1.72E-05  |
| B7ZBD6     | Putative uncharacterized protein RABL2A                                             | RABL2A           | 1.09     |          |          |          | 1.09       |      | 2        | 13         | 1.53E-07  |
| B7Z268     | cDNA FLJ51825, highly similar to Single-stranded DNA-binding protein, mitochondrial | hCG_2014251      |          | 1.09     |          |          | 1.09       |      | 2        | 15         | 7.32E-85  |
| P36404     | ADP-ribosylation factor-like protein 2                                              | ARL2             | 1.09     |          |          |          | 1.09       |      | 4        | 28         | 3.10E-108 |
| Q99417     | Associate of Myc 1                                                                  | AMY1             | 1.09     |          |          |          | 1.09       |      | 4        | 50         | 5.03E-11  |
| P32321-2   | dCMP deaminase                                                                      | DCTD             | 0.96     | 1.22     | 1.10     | 0.91     | 1.09       | 0.13 | 2        | 15         | 3.34E-38  |
| P08238     | Heat shock 84 kDa                                                                   | HSP90AB1         | 1.16     | 1.19     | 0.93     | 1.08     | 1.09       | 0.14 | 60       | 74         | 0.00E+00  |
| Q9Y3B2     | 3-5 exoribonuclease CSL4 homolog                                                    | CGI-108          | 1.22     | 1.20     | 0.86     | 1.16     | 1.09       | 0.20 | 4        | 28         | 3.31E-123 |
| Q14691     | DNA replication complex GINS protein PSF1                                           | GINS1            | 1.23     | 1.19     | 0.86     | 1.16     | 1.09       | 0.20 | 3        | 21         | 2.42E-112 |
| P29372-1   | 3-alkyladenine DNA glycosylase                                                      | AAG              | 1.30     | 1.21     | 0.77     | 1.30     | 1.09       | 0.28 | 6        | 34         | 7.95E-37  |
| P15927-3   | Replication factor A protein 2                                                      | REPA2            | 1.08     | 1.07     | 1.13     | 0.88     | 1.09       | 0.03 | 7        | 28         | 1.70E-50  |
| P25786-2   | 30 kDa prosomal protein                                                             | HC2              | 1.12     | 1.20     | 0.96     | 1.04     | 1.09       | 0.12 | 20       | 69         | 2.07E-208 |
| P21127-    | Cell division cycle 2-                                                              | CDC2L            | 1.08     | 1.24     | 0.96     | 1.04     | 1.09       | 0.14 | 9        | 11         | 2.59E-27  |



| UniProt ID | Protein_Name                                                               | Gene Name | F1 (L/H) | F2 (L/H) | R1 (H/L) | R1 (L/H) | Mean (T/U) | S.D. | Pep. No. | %Seq. Cov. | PEP       |
|------------|----------------------------------------------------------------------------|-----------|----------|----------|----------|----------|------------|------|----------|------------|-----------|
| 1          | like protein kinase 1                                                      | 1         |          |          |          |          |            |      |          |            |           |
| O43252     | 3-phosphoadenosine-5-phosphosulfate synthase                               | ATPSK1    | 1.10     | 1.29     | 0.89     | 1.12     | 1.09       | 0.20 | 10       | 26         | 2.61E-153 |
| Q13601     | HIV-1 Rev-binding protein 2                                                | HRB2      | 1.24     | 1.25     | 0.79     | 1.27     | 1.09       | 0.26 | 4        | 11         | 5.62E-32  |
| Q04637-3   | Eukaryotic translation initiation factor 4 gamma 1                         | EIF4F     | 1.12     | 1.37     | 0.79     | 1.27     | 1.09       | 0.29 | 57       | 37         | 0.00E+00  |
| O00566     | M phase phosphoprotein 10                                                  | MPHOSPH10 | 1.32     | 1.25     | 0.71     | 1.41     | 1.09       | 0.33 | 11       | 26         | 7.63E-177 |
| Q6DKJ4-1   | Nucleoredoxin                                                              | NRX       | 1.06     |          | 1.13     | 0.88     | 1.10       | 0.05 | 2        | 10         | 2.92E-17  |
| Q9NPE3     | H/ACA ribonucleoprotein complex subunit 3                                  | NOLA3     | 1.05     | 1.14     |          |          | 1.10       | 0.06 | 3        | 58         | 1.19E-53  |
| Q96G21     | Brix domain-containing protein 4                                           | BXDC4     | 1.14     | 1.05     |          |          | 1.10       | 0.06 | 3        | 12         | 2.98E-52  |
| P49736     | DNA replication licensing factor MCM2                                      | BM28      | 1.01     |          | 1.18     | 0.85     | 1.10       | 0.12 | 35       | 50         | 0.00E+00  |
| B4DZS0     | cDNA FLJ50316, highly similar to DNAation factor subunit beta (EC 3.-.-.-) | DFFB      | 1.25     |          | 0.94     | 1.06     | 1.10       | 0.22 | 2        | 8.8        | 8.80E-08  |
| Q3ZCM7     | Tubulin beta-8 chain                                                       | TUBB8     | 0.91     |          | 1.28     | 0.78     | 1.10       | 0.26 | 11       | 25         | 8.85E-116 |
| Q9ULI0-1   | ATPase family AAA domain-containing protein 2B                             | ATAD2B    |          | 0.87     | 1.32     | 0.76     | 1.10       | 0.32 | 2        | 2.3        | 4.98E-17  |
| Q6GMV3     | Uncharacterized protein C2orf79                                            | C2orf79   | 1.09     | 1.10     |          |          | 1.10       | 0.01 | 4        | 25         | 1.52E-30  |
| O96033     | Molybdenum cofactor synthesis protein 2 small subunit                      | MOCO1     | 1.12     | 1.07     |          |          | 1.10       | 0.04 | 3        | 28         | 9.32E-05  |
| P84103     | Pre-mRNA-splicing factor SRP20                                             | SFRS3     | 1.08     | 1.08     | 1.13     | 0.88     | 1.10       | 0.03 | 12       | 49         | 1.30E-83  |
| O75494-1   | 40 kDa SR-repressor protein                                                | FUSIP1    | 1.09     | 1.06     | 1.14     | 0.88     | 1.10       | 0.04 | 6        | 24         | 1.30E-47  |
| P17174     | Aspartate aminotransferase, cytoplasmic                                    | GOT1      | 1.07     | 1.06     | 1.16     | 0.86     | 1.10       | 0.06 | 14       | 50         | 2.21E-240 |
| Q96MU7-1   | Putative splicing factor YT521                                             | KIAA1966  | 1.02     | 1.16     | 1.11     | 0.90     | 1.10       | 0.07 | 9        | 13         | 3.29E-36  |
| P83731     | 60S ribosomal protein L24                                                  | RPL24     | 1.05     | 1.05     | 1.19     | 0.84     | 1.10       | 0.08 | 19       | 61         | 2.84E-74  |
| Q13724     | Mannosyl-oligosaccharide glucosidase                                       | GCS1      | 1.08     | 1.21     | 1.00     | 1.00     | 1.10       | 0.11 | 10       | 21         | 1.44E-88  |
| Q15393-1   | Pre-mRNA-splicing factor SF3b 130 kDa subunit                              | KIAA0017  | 1.14     | 1.23     | 0.92     | 1.09     | 1.10       | 0.16 | 25       | 26         | 3.73E-248 |
| Q13045     | Protein flightless-1                                                       | FLII      | 0.95     | 1.02     | 1.32     | 0.76     | 1.10       | 0.20 | 20       | 23         | 8.40E-111 |

| UniProt ID | Protein_Name                                                                                                                                                                                                       | Gene Name         | F1 (L/H) | F2 (L/H) | R1 (H/L) | R1 (L/H) | Mean (T/U) | S.D. | Pep. No. | %Seq. Cov. | PEP       |
|------------|--------------------------------------------------------------------------------------------------------------------------------------------------------------------------------------------------------------------|-------------------|----------|----------|----------|----------|------------|------|----------|------------|-----------|
|            | homolog                                                                                                                                                                                                            |                   |          |          |          |          |            |      |          |            |           |
| Q15554-1   | Telomeric DNA-binding protein                                                                                                                                                                                      | TERF2             | 1.20     | 1.24     | 0.85     | 1.18     | 1.10       | 0.21 | 4        | 12         | 6.86E-59  |
| Q86SX6     | Glutaredoxin-related protein 5, mitochondrial                                                                                                                                                                      | C14orf87          | 1.23     | 1.23     | 0.83     | 1.20     | 1.10       | 0.23 | 3        | 28         | 2.02E-133 |
| Q9Y3E1     | Hepatoma-derived growth factor 2                                                                                                                                                                                   | CGI-142           | 0.92     | 1.00     | 1.37     | 0.73     | 1.10       | 0.24 | 4        | 25         | 2.01E-10  |
| O15160-1   | DNA-directed RNA polymerases I and III 40 kDa polypeptide                                                                                                                                                          | POLR1C            | 1.27     | 1.25     | 0.77     | 1.30     | 1.10       | 0.28 | 7        | 27         | 3.33E-91  |
| Q9NY12-1   | H/ACA ribonucleoprotein complex subunit 1                                                                                                                                                                          | GAR1              | 1.18     | 1.33     | 0.78     | 1.28     | 1.10       | 0.28 | 6        | 28         | 5.37E-29  |
| Q15785     | Mitochondrial import receptor subunit TOM34                                                                                                                                                                        | TOMM34            | 1.29     | 1.23     | 0.77     | 1.30     | 1.10       | 0.28 | 11       | 47         | 1.23E-193 |
| Q8NAN0     | Ferrochelatase                                                                                                                                                                                                     | FECH              | 1.07     | 1.44     | 0.78     | 1.28     | 1.10       | 0.33 | 4        | 12         | 1.54E-29  |
| P23527     | Histone H2B type 1-O                                                                                                                                                                                               | H2BFH             | 0.91     | 0.88     | 1.50     | 0.67     | 1.10       | 0.35 | 13       | 73         | 1.50E-175 |
| A8K435     | cDNA FLJ78564, highly similar to Homo sapiens aldehyde dehydrogenase 5 family, member A1 (succinate-semialdehyde dehydrogenase) (ALDH5A1), nuclear gene encoding mitochondrial protein, transcript variant 2, mRNA | ALDH5A1           | 1.18     | 1.05     | 1.07     | 0.93     | 1.10       | 0.07 | 7        | 15         | 3.31E-25  |
| Q9H2U2-1   | Inorganic pyrophosphatase 2, mitochondrial                                                                                                                                                                         | HSPC124           | 1.05     | 1.05     | 1.2      | 0.83     | 1.10       | 0.09 | 23       | 63         | 9.31E-226 |
| Q00610-1   | Clathrin heavy chain 1                                                                                                                                                                                             | CLH17             | 1.09     | 1.21     | 1.00     | 1.00     | 1.10       | 0.11 | 60       | 43         | 0.00E+00  |
| Q6JUT2     | Toll-like receptor adapter molecule 2 (TICAM-2) (Putative NF-kappa-B-activating protein 502).                                                                                                                      | hCG_37564         | 1.00     | 1.04     | 1.26     | 0.79     | 1.10       | 0.14 | 3        | 10         | 3.98E-07  |
| Q8TD19     | Nercc1 kinase                                                                                                                                                                                                      | KIAA1995          | 1.20     | 1.26     | 0.84     | 1.19     | 1.10       | 0.23 | 4        | 6.5        | 1.17E-15  |
| Q6TXQ4     | Histone H3                                                                                                                                                                                                         | H3                | 1.07     |          | 1.13     | 0.88     | 1.10       | 0.04 | 6        | 52         | 3.54E-95  |
| B0QYN7     | Ubiquitin carrier protein                                                                                                                                                                                          | LA16c-358B7.1-006 | 1.13     | 1.07     |          |          | 1.10       | 0.04 | 4        | 20         | 6.91E-37  |
| O60506-1   | Glycine- and tyrosine-rich RNA-binding                                                                                                                                                                             | HNRPQ             | 1.05     | 1.15     | 1.10     | 0.91     | 1.10       | 0.05 | 25       | 45         | 0.00E+00  |

| UniProt ID | Protein_Name                                                | Gene Name | F1 (L/H) | F2 (L/H) | R1 (H/L) | R1 (L/H) | Mean (T/U) | S.D. | Pep. No. | %Seq. Cov. | PEP       |
|------------|-------------------------------------------------------------|-----------|----------|----------|----------|----------|------------|------|----------|------------|-----------|
|            | protein                                                     |           |          |          |          |          |            |      |          |            |           |
| Q9P1F3     | UPF0727 protein C6orf115                                    | C6orf115  | 1.02     |          | 1.18     | 0.85     | 1.10       | 0.11 | 3        | 54         | 1.33E-16  |
| Q08211     | ATP-dependent RNA helicase A                                | DDX9      | 1.13     | 1.24     | 0.93     | 1.08     | 1.10       | 0.16 | 43       | 40         | 0.00E+00  |
| P26885     | 13 kDa FK506-binding protein                                | FKBP13    | 0.98     | 1.22     |          |          | 1.10       | 0.17 | 3        | 14         | 4.08E-09  |
| O60306     | Intron-binding protein aquarius                             | AQR       | 1.07     | 1.29     | 0.94     | 1.06     | 1.10       | 0.18 | 19       | 15         | 4.90E-85  |
| Q96GX5-1   | Microtubule-associated serine/threonine-protein kinase-like | MASTL     |          |          | 1.10     | 0.91     | 1.10       |      | 2        | 4.1        | 3.70E-05  |
| Q9ULU8-4   | Calcium-dependent activator protein for secretion 1         | CADPS     |          |          | 1.10     | 0.91     | 1.10       |      | 2        | 1          | 1.66E-03  |
| Q1HDL3     | HBeAg-binding protein 2 binding protein A                   | HBEBP2BPA |          |          | 1.10     | 0.91     | 1.10       |      | 2        | 8          | 2.44E-12  |
| P10321     | MHC class I antigen Cw                                      | HLA-Cw    |          |          | 1.10     | 0.91     | 1.10       |      | 7        | 26         | 9.68E-117 |
| Q9Y211-1   | Imidazoline receptor 1                                      | IRAS      | 1.10     |          |          |          | 1.10       |      | 2        | 1.9        | 2.37E-04  |
| Q5T6V5     | UPF0553 protein C9orf64                                     | C9orf64   |          | 1.10     |          |          | 1.10       |      | 3        | 8.8        | 1.67E-08  |
| Q5U0E9     | Cellular nucleic acid binding protein alpha variant 1       | CNBP1     | 1.1      |          |          |          | 1.10       |      | 9        | 45         | 2.96E-161 |
| Q86UX7-1   | Fermitin family homolog 3                                   | FERMT3    | 1.06     | 1.13     | 1.12     | 0.89     | 1.10       | 0.04 | 21       | 46         | 1.89E-211 |
| Q15005     | Microsomal signal peptidase 25 kDa subunit                  | KIAA0102  | 1.16     | 1.07     | 1.08     | 0.93     | 1.10       | 0.05 | 6        | 35         | 1.32E-137 |
| Q5T0S6     | Palmitoyl-protein thioesterase 1                            | PPT1      | 1.07     | 1.16     | 1.08     | 0.93     | 1.10       | 0.05 | 7        | 38         | 1.63E-75  |
| B0V0T1     | Low molecular mass protein 2                                | LMP2      | 1.05     | 1.08     | 1.18     | 0.85     | 1.10       | 0.07 | 5        | 30         | 2.22E-73  |
| P27694     | Replication factor A protein 1                              | REPA1     | 1.12     | 1.02     | 1.17     | 0.85     | 1.10       | 0.08 | 17       | 38         | 1.21E-267 |
| Q15293     | Reticulocalbin-1                                            | RCN       | 0.90     | 1.27     | 1.14     | 0.88     | 1.10       | 0.19 | 5        | 18         | 1.67E-43  |
| P23284     | Cyclophilin B                                               | CYPB      | 1.27     | 1.22     | 0.82     | 1.22     | 1.10       | 0.25 | 12       | 48         | 1.64E-98  |
| P61604     | 10 kDa chaperonin                                           | HSPE1     | 1.24     | 1.28     | 0.79     | 1.27     | 1.10       | 0.27 | 12       | 78         | 2.24E-65  |
| Q13838-2   | 56 kDa U2AF65-associated protein                            | BAT1      | 1.08     | 1.12     | 1.11     | 0.90     | 1.10       | 0.02 | 19       | 50         | 6.40E-152 |
| O75150-1   | 95 kDa retinoblastoma-associated protein                    | BRE1B     | 1.05     | 1.15     | 1.11     | 0.90     | 1.10       | 0.05 | 23       | 25         | 2.43E-99  |
| Q13445     | Interleukin-1 receptor-like 1 ligand                        | IL1RL1L   | 1.15     |          | 1.06     | 0.94     | 1.11       | 0.06 | 2        | 12         | 2.45E-06  |
| P34913     | Cytosolic epoxide hydrolase                                 | EPHX2     | 1.15     |          | 1.06     | 0.94     | 1.11       | 0.06 | 4        | 11         | 4.70E-11  |
| B5MD17     | Putative uncharacterized                                    | CBX1      | 1.04     |          | 1.17     | 0.85     | 1.11       | 0.09 | 7        | 51         | 2.98E-140 |

| UniProt ID | Protein_Name                                                      | Gene Name   | F1 (L/H) | F2 (L/H) | R1 (H/L) | R1 (L/H) | Mean (T/U) | S.D. | Pep. No. | %Seq. Cov. | PEP       |
|------------|-------------------------------------------------------------------|-------------|----------|----------|----------|----------|------------|------|----------|------------|-----------|
|            | protein CBX1                                                      |             |          |          |          |          |            |      |          |            |           |
| Q08623     | Haloacid dehalogenase-like hydrolase domain-containing protein 1A | DXF68 S1E   | 1.20     |          | 1.01     | 0.99     | 1.11       | 0.13 | 4        | 26         | 4.68E-76  |
| Q96CB8     | Integrator complex subunit 12                                     | INTS12      |          | 1.00     | 1.21     | 0.83     | 1.11       | 0.15 | 2        | 6.7        | 7.10E-18  |
| B4DN31     | cDNA FLJ55809                                                     | CHID1       |          | 1.22     | 0.99     | 1.01     | 1.11       | 0.16 | 2        | 5.5        | 1.74E-06  |
| Q9H5N1-1   | Rab GTPase-binding effector protein 2                             | RABEP2      |          | 0.94     | 1.27     | 0.79     | 1.11       | 0.23 | 2        | 3.9        | 9.12E-07  |
| Q8WU D4    | Coiled-coil domain-containing protein 12                          | CCDC12      | 0.87     |          | 1.34     | 0.75     | 1.11       | 0.33 | 6        | 42         | 3.32E-21  |
| Q9NX70     | Intersex-like protein                                             | IXL         |          | 0.81     | 1.40     | 0.71     | 1.11       | 0.42 | 2        | 13         | 4.96E-101 |
| Q9BTC0-4   | Death-associated transcription factor 1                           | C20orf158   | 0.98     | 1.32     | 1.02     | 0.98     | 1.11       | 0.19 | 7        | 4.4        | 1.45E-33  |
| P53007     | Citrate transport protein                                         | SLC20A3     | 1.15     | 0.85     | 1.32     | 0.76     | 1.11       | 0.24 | 4        | 14         | 6.53E-14  |
| Q92820     | Conjugase                                                         | GGH         | 0.93     | 0.93     | 1.46     | 0.68     | 1.11       | 0.31 | 4        | 16         | 9.46E-245 |
| Q9NPL8     | Protein M5-14                                                     | C3orf1      | 1.36     | 1.31     | 0.65     | 1.54     | 1.11       | 0.40 | 8        | 33         | 3.46E-63  |
| Q99856     | AT-rich interactive domain-containing protein 3A                  | ARID3A      | 0.78     | 0.84     | 1.70     | 0.59     | 1.11       | 0.51 | 4        | 12         | 2.16E-41  |
| Q9H9L3     | Interferon-stimulated 20 kDa exonuclease-like 2                   | HSD38       | 1.06     | 1.16     |          |          | 1.11       | 0.07 | 2        | 7.6        | 1.55E-22  |
| Q13523     | PRP4 kinase                                                       | KIAA0536    | 1.04     | 1.18     |          |          | 1.11       | 0.10 | 4        | 4.5        | 3.54E-08  |
| P28074     | Macropain epsilon chain                                           | LMPX        | 1.23     | 1.16     | 0.94     | 1.06     | 1.11       | 0.15 | 13       | 54         | 8.38E-233 |
| B5MDF5     | Putative uncharacterized protein RAN                              | hCG_1744585 | 1.23     | 1.16     | 0.94     | 1.06     | 1.11       | 0.15 | 14       | 44         | 3.70E-118 |
| Q99575     | Ribonucleases P/MRP protein subunit POP1                          | KIAA0061    | 0.97     | 1.54     | 0.82     | 1.22     | 1.11       | 0.38 | 7        | 9.8        | 2.77E-26  |
| P61960     | Ubiquitin-fold modifier 1                                         | BM-002      | 1.11     |          | 1.11     | 0.90     | 1.11       | 0.00 | 2        | 59         | 1.85E-29  |
| A1L0T0-1   | Acetolactate synthase-like protein                                | AHAS        | 1.10     |          | 1.12     | 0.89     | 1.11       | 0.01 | 2        | 6.3        | 1.52E-15  |
| O14497-1   | AT-rich interactive domain-containing protein 1A                  | ARID1A      | 1.05     | 1.11     | 1.17     | 0.85     | 1.11       | 0.06 | 23       | 17         | 1.81E-165 |
| Q2TAY7     | Smu-1 suppressor of mec-8 and unc-52 protein homolog              | SMU1        | 1.02     | 1.27     | 1.04     | 0.96     | 1.11       | 0.14 | 7        | 15         | 5.96E-43  |
| Q9UHI6     | Component of gems 3                                               | DDX20       | 1.10     | 1.26     | 0.97     | 1.03     | 1.11       | 0.15 | 5        | 8.3        | 1.06E-37  |
| Q13423     | NAD(P) transhydrogenase, mitochondrial                            | NNT         | 0.95     | 1.13     | 1.25     | 0.80     | 1.11       | 0.15 | 8        | 9.4        | 5.94E-38  |
| P45954     | 2-methyl branched chain acyl-CoA                                  | ACADS B     | 0.91     | 1.21     | 1.21     | 0.83     | 1.11       | 0.17 | 2        | 5.3        | 2.91E-05  |

| UniProt ID | Protein_Name                                                  | Gene Name | F1 (L/H) | F2 (L/H) | R1 (H/L) | R1 (L/H) | Mean (T/U) | S.D. | Pep. No. | %Seq. Cov. | PEP       |
|------------|---------------------------------------------------------------|-----------|----------|----------|----------|----------|------------|------|----------|------------|-----------|
|            | dehydrogenase                                                 |           |          |          |          |          |            |      |          |            |           |
| O43615     | Mitochondrial import inner membrane translocase subunit TIM44 | MIMT44    | 1.08     | 1.32     | 0.93     | 1.08     | 1.11       | 0.20 | 9        | 19         | 1.82E-78  |
| Q9H4M9     | EH domain-containing protein 1                                | CDABP0131 | 1.01     | 0.98     | 1.34     | 0.75     | 1.11       | 0.20 | 7        | 19         | 1.96E-140 |
| Q9H7Z7     | Microsomal prostaglandin E synthase 2                         | C9orf15   | 1.33     |          | 0.89     | 1.12     | 1.11       | 0.31 | 4        | 19         | 8.03E-38  |
| P61313     | 60S ribosomal protein L15                                     | EC45      | 1.23     | 1.43     | 0.67     | 1.49     | 1.11       | 0.39 | 10       | 44         | 3.99E-55  |
| Q8N766-1   | Uncharacterized protein KIAA0090                              | KIAA0090  | 1.08     | 1.53     | 0.72     | 1.39     | 1.11       | 0.41 | 4        | 7          | 1.55E-13  |
| P50454     | 47 kDa heat shock protein                                     | CBP1      | 0.76     | 0.96     | 1.61     | 0.62     | 1.11       | 0.44 | 4        | 13         | 1.20E-28  |
| P04181     | Ornithine aminotransferase, hepatic form                      | OAT       | 1.52     | 1.34     | 0.47     | 2.13     | 1.11       | 0.56 | 7        | 24         | 1.99E-68  |
| Q9H8W4     | PH and FYVE domain-containing protein 2                       | PLEKH F2  |          | 1.11     |          |          | 1.11       |      | 2        | 7.2        | 4.56E-04  |
| B7ZKU0     | C11orf30 protein                                              | C11orf30  |          | 1.11     |          |          | 1.11       |      | 2        | 1.1        | 1.72E-02  |
| Q9H0E9-1   | Bromodomain-containing protein 8                              | BRD8      | 1.11     |          |          |          | 1.11       |      | 3        | 3.8        | 3.90E-04  |
| Q68CZ6     | HAUS augmin-like complex subunit 3                            | C4orf15   |          | 1.11     |          |          | 1.11       |      | 3        | 5.3        | 9.04E-09  |
| Q9BT73     | Proteasome assembly chaperone 3                               | C7orf48   | 1.11     |          |          |          | 1.11       |      | 3        | 43         | 7.10E-05  |
| A8K0Z3     | CXYorf1-like protein on chromosome 9                          | FAM39E    |          | 1.11     |          |          | 1.11       |      | 3        | 7.9        | 3.18E-20  |
| O15235     | 28S ribosomal protein S12, mitochondrial                      | MRPS12    | 1.11     |          |          |          | 1.11       |      | 4        | 23         | 8.83E-07  |
| Q15819     | Enterocyte differentiation-associated factor 1                | MMS2      |          | 1.11     |          |          | 1.11       |      | 5        | 33         | 1.20E-20  |
| Q8N9N7     | Leucine-rich repeat-containing protein 57                     | LRRC57    | 1.11     |          |          |          | 1.11       |      | 6        | 28         | 8.30E-27  |
| P54577     | Tyrosyl--tRNA ligase                                          | YARS      | 1.07     | 1.11     | 1.16     | 0.86     | 1.11       | 0.05 | 25       | 53         | 5.82E-169 |
| P38919     | ATP-dependent RNA helicase DDX48                              | DDX48     | 1.11     | 1.16     | 1.07     | 0.93     | 1.11       | 0.05 | 18       | 46         | 1.18E-202 |
| P43403-1   | 70 kDa zeta-associated protein                                | SRK       | 1.30     | 1.29     | 0.75     | 1.33     | 1.11       | 0.31 | 22       | 44         | 4.31E-188 |
| Q86UY3     | ARHGAP4 protein                                               | ARHGAP4   | 1.27     | 1.26     | 0.81     | 1.23     | 1.11       | 0.26 | 9        | 14         | 1.43E-80  |
| Q9BUH6-1   | Uncharacterized protein C9orf142                              | C9orf142  | 1.22     | 1.52     | 0.60     | 1.67     | 1.11       | 0.47 | 2        | 13         | 5.57E-34  |
| P09488-1   | Glutathione S-transferase Mu 1                                | GST1      | 1.19     |          | 1.04     | 0.96     | 1.12       | 0.11 | 7        | 33         | 1.26E-71  |
| Q8WVC6-1   | Dephospho-CoA kinase domain-                                  | DCAKD     | 1.24     |          | 0.99     | 1.01     | 1.12       | 0.18 | 3        | 14         | 3.59E-08  |

| UniProt ID | Protein_Name                                                                                                                                     | Gene Name | F1 (L/H) | F2 (L/H) | R1 (H/L) | R1 (L/H) | Mean (T/U) | S.D. | Pep. No. | %Seq. Cov. | PEP       |
|------------|--------------------------------------------------------------------------------------------------------------------------------------------------|-----------|----------|----------|----------|----------|------------|------|----------|------------|-----------|
|            | containing protein                                                                                                                               |           |          |          |          |          |            |      |          |            |           |
| B2RCK3     | cDNA, FLJ96127, highly similar to Homo sapiens glutathione transferase zeta 1 (maleylacetoacetate isomerase) (GSTZ1), transcript variant 3, mRNA | GSTZ1     | 1.31     |          | 0.92     | 1.09     | 1.12       | 0.28 | 3        | 24         | 1.22E-34  |
| Q9NX62     | Inositol monophosphatase 3                                                                                                                       | IMPA3     | 0.91     |          | 1.32     | 0.76     | 1.12       | 0.29 | 2        | 11         | 1.81E-09  |
| Q9NYF8-1   | Bcl-2-associated transcription factor 1                                                                                                          | BCLAF1    | 1.04     | 1.18     | 1.13     | 0.88     | 1.12       | 0.07 | 24       | 24         | 3.14E-105 |
| Q9Y4L1     | 150 kDa oxygen-regulated protein                                                                                                                 | GRP170    | 1.17     | 1.27     | 0.91     | 1.10     | 1.12       | 0.19 | 44       | 54         | 0.00E+00  |
| P18858     | DNA ligase 1                                                                                                                                     | LIG1      | 1.23     | 1.26     | 0.86     | 1.16     | 1.12       | 0.22 | 21       | 30         | 5.79E-273 |
| P13987     | 1F5 antigen                                                                                                                                      | CD59      | 1.31     | 0.97     | 1.07     | 0.93     | 1.12       | 0.17 | 3        | 25         | 2.23E-18  |
| Q14204     | Cytoplasmic dynein 1 heavy chain 1                                                                                                               | DHC1      | 1.28     | 1.37     | 0.70     | 1.43     | 1.12       | 0.36 | ##       | 29         | 0.00E+00  |
| O43242     | 26S proteasome non-ATPase regulatory subunit 3                                                                                                   | PSMD3     | 1.18     | 1.20     | 0.98     | 1.02     | 1.12       | 0.12 | 16       | 38         | 3.56E-158 |
| O76021     | Cellular senescence-inhibited gene protein                                                                                                       | CATX11    | 1.19     | 1.20     | 0.97     | 1.03     | 1.12       | 0.13 | 23       | 46         | 0.00E+00  |
| O43776     | Asparagine--tRNA ligase                                                                                                                          | NARS      | 1.26     | 1.17     | 0.93     | 1.08     | 1.12       | 0.17 | 16       | 36         | 5.12E-181 |
| Q96S44     | Nori-2                                                                                                                                           | C20orf64  | 1.24     | 1.20     | 0.92     | 1.09     | 1.12       | 0.17 | 4        | 20         | 1.88E-82  |
| Q8IUD2-1   | ELKS/Rab6-interacting/CAST family member 1                                                                                                       | ELKS      | 1.01     | 0.91     | 1.44     | 0.69     | 1.12       | 0.28 | 4        | 5.8        | 1.14E-33  |
| Q13952-1   | CAAT box DNA-binding protein subunit C                                                                                                           | NFYC      | 1.18     | 1.06     |          |          | 1.12       | 0.08 | 3        | 7.6        | 1.43E-17  |
| Q16836-2   | Hydroxyacyl-coenzyme A dehydrogenase, mitochondrial                                                                                              | HAD       | 1.07     | 1.07     | 1.22     | 0.82     | 1.12       | 0.09 | 10       | 35         | 3.19E-81  |
| O15260-1   | Surfeit locus protein 4                                                                                                                          | SURF4     | 1.05     |          | 1.19     | 0.84     | 1.12       | 0.10 | 3        | 15         | 1.02E-22  |
| P51809-1   | Synaptobrevin-like protein 1                                                                                                                     | SYBL1     | 1.19     | 1.05     |          |          | 1.12       | 0.10 | 3        | 11         | 2.68E-03  |
| O95777     | N-alpha-acetyltransferase 38, NatC auxiliary subunit                                                                                             | LSM8      | 1.08     | 1.04     | 1.24     | 0.81     | 1.12       | 0.11 | 3        | 47         | 1.26E-58  |
| Q13158     | FAS-associated death domain protein                                                                                                              | FADD      | 1.04     |          | 1.20     | 0.83     | 1.12       | 0.11 | 4        | 29         | 2.34E-252 |
| Q9H501     | ABT1-associated protein                                                                                                                          | ABTAP     |          | 1.21     | 1.03     | 0.97     | 1.12       | 0.13 | 4        | 5.9        | 1.64E-23  |
| Q3LXA3     | ATP-dependent dihydroxyacetone kinase                                                                                                            | DAK       | 1.09     | 1.28     | 0.99     | 1.01     | 1.12       | 0.15 | 6        | 18         | 3.31E-87  |

| UniProt ID | Protein_Name                                                                    | Gene Name   | F1 (L/H) | F2 (L/H) | R1 (H/L) | R1 (L/H) | Mean (T/U) | S.D. | Pep. No. | %Seq. Cov. | PEP       |
|------------|---------------------------------------------------------------------------------|-------------|----------|----------|----------|----------|------------|------|----------|------------|-----------|
| P84243     | Histone H3.3                                                                    | H3.3A       | 1.01     |          | 1.23     | 0.81     | 1.12       | 0.16 | 8        | 53         | 1.24E-86  |
| P33991     | CDC21 homolog                                                                   | CDC21       |          | 0.97     | 1.27     | 0.79     | 1.12       | 0.21 | 37       | 49         | 0.00E+00  |
| B4DMQ9     | cDNA FLJ58590, highly similar to YLP motif-containing protein 1                 | YLPM1       | 1.23     | 1.30     | 0.83     | 1.20     | 1.12       | 0.25 | 21       | 14         | 4.52E-175 |
| Q9UBW8     | COP9 signalosome complex subunit 7a                                             | COPS7A      | 1.62     |          | 0.62     | 1.61     | 1.12       | 0.71 | 2        | 11         | 2.03E-45  |
| Q15596     | Class E basic helix-loop-helix protein 75                                       | BHLHE75     |          |          | 1.12     | 0.89     | 1.12       |      | 2        | 1.4        | 4.04E-02  |
| Q9BSH4     | Coiled-coil domain-containing protein 44                                        | CCDC44      |          |          | 1.12     | 0.89     | 1.12       |      | 2        | 11         | 3.08E-10  |
| Q8TB03-1   | Uncharacterized protein CXorf38                                                 | CXorf38     |          |          | 1.12     | 0.89     | 1.12       |      | 3        | 10         | 1.06E-05  |
| Q9Y3Q8     | TSC22 domain family protein 4                                                   | TILZ2       | 1.12     |          |          |          | 1.12       |      | 2        | 17         | 5.52E-17  |
| P30405     | Cyclophilin F                                                                   | CYP3        | 1.12     |          |          |          | 1.12       |      | 2        | 7.2        | 6.55E-03  |
| Q9NSU2-1   | 3-5 exonuclease TREX1                                                           | TREX1       | 1.12     |          |          |          | 1.12       |      | 2        | 6.5        | 8.11E-05  |
| Q7Z5R6     | Amyloid beta A4 precursor protein-binding family B member 1-interacting protein | APBB1IP     |          | 1.12     |          |          | 1.12       |      | 2        | 2.9        | 4.44E-05  |
| Q96CS2-1   | Coiled-coil domain-containing protein 5                                         | CCDC5       | 1.12     |          |          |          | 1.12       |      | 2        | 11         | 5.91E-05  |
| Q5JRA6-1   | C219-reactive peptide                                                           | KIAA0268    | 1.12     |          |          |          | 1.12       |      | 2        | 1.3        | 5.30E-18  |
| A4D1Z4     | KIAA0415 gene product                                                           | KIAA0415    |          | 1.12     |          |          | 1.12       |      | 2        | 1.1        | 4.63E-03  |
| B7WPI0     | Linker for activation of T cells, isoform CRA_d                                 | hCG_2039637 | 1.12     |          |          |          | 1.12       |      | 3        | 26         | 1.23E-14  |
| Q9NZM3-1   | Intersectin-2                                                                   | ITSN2       | 1.12     |          |          |          | 1.12       |      | 5        | 4.1        | 3.99E-18  |
| P24666-1   | Adipocyte acid phosphatase                                                      | ACP1        | 1.15     | 1.14     | 1.08     | 0.93     | 1.12       | 0.04 | 8        | 61         | 3.34E-96  |
| Q9Y3A5     | Ribosome maturation protein SBDS                                                | CGI-97      | 1.18     | 1.00     | 1.19     | 0.84     | 1.12       | 0.11 | 3        | 12         | 8.53E-14  |
| Q9Y277-2   | Outer mitochondrial membrane protein porin 3                                    | VDAC3       | 1.26     | 1.12     | 0.99     | 1.01     | 1.12       | 0.14 | 5        | 22         | 2.51E-39  |
| P14868     | Aspartate--tRNA ligase                                                          | DARS        | 1.17     | 1.27     | 0.93     | 1.08     | 1.12       | 0.17 | 15       | 33         | 8.76E-63  |
| Q14839-2   | ATP-dependent helicase CHD4                                                     | CHD4        | 1.17     | 1.33     | 0.87     | 1.15     | 1.12       | 0.23 | 32       | 24         | 2.68E-189 |
| P51571     | Signal sequence receptor subunit delta                                          | SSR4        | 1.24     | 1.28     | 0.85     | 1.18     | 1.12       | 0.24 | 4        | 29         | 4.49E-45  |
| Q96DB5     | Protein FAM82B                                                                  | CGI-90      | 0.84     | 1.21     | 1.32     | 0.76     | 1.12       | 0.25 | 4        | 11         | 4.40E-18  |
| O95456     | Chromosome 21 leucine-rich protein                                              | C21LRP      | 1.28     | 1.28     | 0.81     | 1.23     | 1.12       | 0.27 | 6        | 28         | 2.73E-92  |

| UniProt ID | Protein_Name                                                          | Gene Name             | F1 (L/H) | F2 (L/H) | R1 (H/L) | R1 (L/H) | Mean (T/U) | S.D. | Pep. No. | %Seq. Cov. | PEP       |
|------------|-----------------------------------------------------------------------|-----------------------|----------|----------|----------|----------|------------|------|----------|------------|-----------|
| -1         |                                                                       |                       |          |          |          |          |            |      |          |            |           |
| Q8IXT5     | RNA-binding motif protein 12B                                         | RBM12B                | 1.03     | 1.44     | 0.90     | 1.11     | 1.12       | 0.28 | 4        | 4.4        | 1.57E-24  |
| P60510     | Protein phosphatase X                                                 | PPP4                  | 1.38     | 1.18     | 0.81     | 1.23     | 1.12       | 0.29 | 4        | 17         | 3.00E-64  |
| Q9Y2B0-1   | MIR-interacting saposin-like protein                                  | CNPY2                 | 1.31     | 1.27     | 0.79     | 1.27     | 1.12       | 0.29 | 8        | 65         | 1.90E-120 |
| Q13469-1   | NFAT pre-existing subunit                                             | NFAT1                 | 1.21     |          | 1.04     | 0.96     | 1.13       | 0.12 | 2        | 2.8        | 2.56E-04  |
| B4DQM4     | cDNA FLJ61157, highly similar to XPA-binding protein 1                | GPN1                  | 1.01     | 1.24     |          |          | 1.13       | 0.16 | 2        | 6.4        | 1.59E-44  |
| Q9HD20-1   | Probable cation-transporting ATPase 13A1                              | ATP13A                |          | 1.36     | 0.89     | 1.12     | 1.13       | 0.33 | 3        | 2.8        | 8.14E-05  |
| Q8N9N8     | Eukaryotic translation initiation factor 1A domain-containing protein | EIF1AD                | 1.16     | 1.19     | 1.03     | 0.97     | 1.13       | 0.09 | 5        | 39         | 2.99E-59  |
| O00487     | 26S proteasome non-ATPase regulatory subunit 14                       | POH1                  | 1.22     | 1.13     | 1.03     | 0.97     | 1.13       | 0.10 | 6        | 38         | 2.85E-96  |
| B1AH57     | RAB, member of RAS oncogene family-like 4                             | LL22NC01-132D12.2-002 | 1.25     | 0.98     | 1.15     | 0.87     | 1.13       | 0.14 | 3        | 18         | 6.72E-80  |
| Q16740     | Endopeptidase Clp                                                     | CLPP                  | 1.03     | 1.03     | 1.32     | 0.76     | 1.13       | 0.17 | 9        | 35         | 4.08E-136 |
| Q562R1     | Beta-actin-like protein 2                                             | ACTBL2                | 1.21     | 1.24     | 0.93     | 1.08     | 1.13       | 0.17 | 8        | 26         | 5.96E-120 |
| Q4VC31     | Coiled-coil domain-containing protein 58                              | CCDC58                | 1.44     | 1.00     | 0.94     | 1.06     | 1.13       | 0.27 | 3        | 25         | 4.73E-29  |
| O14744     | 72 kDa IChn-binding protein                                           | HRMT1L5               | 1.28     | 1.34     | 0.76     | 1.32     | 1.13       | 0.32 | 12       | 24         | 1.72E-34  |
| P15529-2   | Membrane cofactor protein                                             | CD46                  | 1.15     |          | 1.11     | 0.90     | 1.13       | 0.03 | 2        | 5.5        | 2.64E-18  |
| Q59FB9     | Toll interacting protein variant                                      | TOLLIP                | 1.04     |          | 1.22     | 0.82     | 1.13       | 0.13 | 3        | 9.9        | 1.95E-14  |
| O75915     | ADP-ribosylation factor-like protein 6-interacting protein 5          | ARL6IP5               | 1.03     |          | 1.23     | 0.81     | 1.13       | 0.14 | 3        | 17         | 1.37E-88  |
| P46779     | 60S ribosomal protein L28                                             | RPL28                 |          | 1.02     | 1.24     | 0.81     | 1.13       | 0.16 | 16       | 52         | 1.16E-95  |
| Q8IV63     | Serine/threonine-protein kinase VRK3                                  | VRK3                  |          |          | 1.13     | 0.88     | 1.13       |      | 2        | 4.4        | 2.32E-17  |
| Q5JRS2     | Ubiquitin-like modifier activating enzyme 1                           | CTD-2522E6.1-008      |          |          | 1.13     | 0.88     | 1.13       |      | 11       | 43         | 3.21E-128 |
| O14925     | Mitochondrial import inner membrane translocase subunit Tim23         | TIM23                 | 1.13     |          |          |          | 1.13       |      | 2        | 12         | 6.57E-29  |
| O15127     | Secretory carrier-associated membrane protein 2                       | SCAMP2                | 1.13     |          |          |          | 1.13       |      | 3        | 14         | 5.62E-94  |



| UniProt ID | Protein_Name                                                       | Gene Name  | F1 (L/H) | F2 (L/H) | R1 (H/L) | R1 (L/H) | Mean (T/U) | S.D. | Pep. No. | %Seq. Cov. | PEP       |
|------------|--------------------------------------------------------------------|------------|----------|----------|----------|----------|------------|------|----------|------------|-----------|
| Q00746     | Nucleoside diphosphate kinase                                      | NME1-NME2  | 1.13     |          |          |          | 1.13       |      | 5        | 81         | 2.30E-92  |
| Q8N257     | H2B type 12                                                        | HIST3 H2BB |          | 1.13     |          |          | 1.13       |      | 12       | 73         | 2.01E-85  |
| P13929-1   | 2-phospho-D-glycerate hydro-lyase                                  | ENO3       | 1.13     |          |          |          | 1.13       |      | 12       | 26         | 1.02E-229 |
| Q96HE7     | Endoplasmic oxidoreductin-1-like protein                           | ERO1L      | 1.22     | 1.09     | 1.08     | 0.93     | 1.13       | 0.08 | 10       | 26         | 1.54E-69  |
| O75688-1   | Protein phosphatase 1B                                             | PP2CB      | 0.91     | 1.11     | 1.37     | 0.73     | 1.13       | 0.23 | 3        | 7.3        | 6.62E-23  |
| P61160     | Actin-like protein 2                                               | ACTR2      | 0.92     |          | 1.34     | 0.75     | 1.13       | 0.30 | 15       | 37         | 3.42E-161 |
| P30044-1   | Alu corepressor 1                                                  | ACR1       | 1.16     | 1.19     | 1.05     | 0.95     | 1.13       | 0.07 | 11       | 56         | 3.86E-249 |
| Q5JSH3-1   | Rabphilin-11                                                       | WDR44      | 1.18     | 0.83     | 1.39     | 0.72     | 1.13       | 0.28 | 2        | 3.1        | 1.68E-07  |
| P05114     | High mobility group nucleosome-binding domain-containing protein 1 | HMG14      | 1.14     | 1.24     | 1.02     | 0.98     | 1.13       | 0.11 | 7        | 53         | 7.14E-67  |
| P49914     | 5,10-methenyl-tetrahydrofolate synthetase                          | MTHFS      | 1.06     | 1.42     | 0.92     | 1.09     | 1.13       | 0.26 | 4        | 24         | 6.43E-13  |
| C9JI13     | Putative uncharacterized protein CCNK                              | CCNK       | 1.54     | 1.18     | 0.68     | 1.47     | 1.13       | 0.43 | 3        | 9.8        | 2.83E-42  |
| Q8WX92     | Cofactor of BRCA1                                                  | COBR A1    | 1.06     | 1.30     | 1.04     | 0.96     | 1.13       | 0.14 | 6        | 17         | 1.10E-25  |
| Q99816-1   | ESCRT-I complex subunit TSG101                                     | TSG101     |          | 1.14     | 1.13     | 0.88     | 1.14       | 0.01 | 3        | 9.5        | 3.63E-15  |
| B4DV10     | cDNA FLJ59142, highly similar to Epididymal secretory protein E1   | HE1        | 1.15     | 1.12     |          |          | 1.14       | 0.02 | 4        | 29         | 4.99E-81  |
| P09234     | U1 small nuclear ribonucleoprotein C                               | SNRPC      | 1.18     |          | 1.09     | 0.92     | 1.14       | 0.06 | 2        | 13         | 1.79E-25  |
| O43933     | Peroxin-1                                                          | PEX1       | 1.18     |          | 1.09     | 0.92     | 1.14       | 0.06 | 2        | 2.5        | 1.83E-06  |
| Q9NQT5     | Exosome complex exonuclease RRP40                                  | CGI-102    | 1.27     | 1.00     |          |          | 1.14       | 0.19 | 4        | 30         | 1.32E-26  |
| O43598     | c-Myc-responsive protein Rcl                                       | C6orf108   | 0.96     |          | 1.31     | 0.76     | 1.14       | 0.25 | 7        | 58         | 1.72E-35  |
| Q08722-1   | Antigenic surface determinant protein OA3                          | CD47       | 1.17     | 1.20     | 1.04     | 0.96     | 1.14       | 0.09 | 4        | 12         | 2.54E-04  |
| O75844     | CAAX prenyl protease 1 homolog                                     | FACE1      | 1.02     | 1.25     | 1.14     | 0.88     | 1.14       | 0.12 | 3        | 6.1        | 2.05E-65  |
| Q15291-1   | Retinoblastoma-binding protein 5                                   | RBBP5      | 1.00     | 1.19     | 1.22     | 0.82     | 1.14       | 0.12 | 2        | 4          | 9.60E-05  |
| P11279     | CD107 antigen-like family member A                                 | LAMP1      | 1.29     | 1.13     | 0.99     | 1.01     | 1.14       | 0.15 | 4        | 9.8        | 5.76E-74  |
| O14773-1   | Cell growth-inhibiting gene 1 protein                              | CLN2       | 1.35     | 1.12     | 0.94     | 1.06     | 1.14       | 0.21 | 5        | 12         | 9.83E-64  |

| UniProt ID | Protein_Name                                                                                                        | Gene Name | F1 (L/H) | F2 (L/H) | R1 (H/L) | R1 (L/H) | Mean (T/U) | S.D. | Pep. No. | %Seq. Cov. | PEP       |
|------------|---------------------------------------------------------------------------------------------------------------------|-----------|----------|----------|----------|----------|------------|------|----------|------------|-----------|
| B2ZZ83     | Filamin B                                                                                                           | FLNB      | 1.33     | 1.31     | 0.77     | 1.30     | 1.14       | 0.32 | 85       | 47         | 0.00E+00  |
| Q92530     | Proteasome inhibitor PI31 subunit                                                                                   | PSMF1     | 1.56     | 1.19     | 0.66     | 1.52     | 1.14       | 0.45 | 5        | 34         | 2.75E-141 |
| Q9H307-1   | 140 kDa nuclear and cell adhesion-related phosphoprotein                                                            | DRS       | 1.10     | 1.19     | 1.13     | 0.88     | 1.14       | 0.05 | 20       | 31         | 1.29E-126 |
| Q9H2P0     | Activity-dependent neuroprotective protein                                                                          | ADNP      | 1.15     | 1.18     | 1.09     | 0.92     | 1.14       | 0.05 | 6        | 10         | 2.18E-65  |
| Q96AE4-2   | DNA helicase V                                                                                                      | FUBP1     | 1.09     | 1.28     | 1.05     | 0.95     | 1.14       | 0.12 | 36       | 55         | 0.00E+00  |
| P30049     | ATP synthase subunit delta, mitochondrial                                                                           | ATP5D     | 1.00     | 1.30     | 1.12     | 0.89     | 1.14       | 0.15 | 3        | 38         | 5.97E-81  |
| Q8NBJ5     | Glycosyltransferase 25 family member 1                                                                              | GLT25D1   | 1.20     | 1.30     | 0.92     | 1.09     | 1.14       | 0.20 | 3        | 5.1        | 8.54E-09  |
| Q8WU39-1   | Plasma cell-induced resident endoplasmic reticulum protein                                                          | HSPC190   | 1.33     | 1.33     | 0.76     | 1.32     | 1.14       | 0.33 | 6        | 52         | 4.07E-126 |
| Q92522     | Histone H1x                                                                                                         | H1FX      | 0.85     | 1.01     | 1.56     | 0.64     | 1.14       | 0.37 | 7        | 30         | 1.35E-78  |
| Q9Y3C4-3   | PRPK-binding protein                                                                                                | CGI-121   | 1.64     |          | 0.64     | 1.56     | 1.14       | 0.71 | 2        | 14         | 4.31E-135 |
| P05771-2   | Protein kinase C beta type                                                                                          | PKCB      |          |          | 1.14     | 0.88     | 1.14       |      | 2        | 4.8        | 3.66E-04  |
| O75410-2   | Gastric cancer antigen Ga55                                                                                         | KIAA1103  |          |          | 1.14     | 0.88     | 1.14       |      | 2        | 2.7        | 4.72E-04  |
| B3KY41     | cDNA FLJ46786 fis, clone TRACH3028837, highly similar to Homo sapiens smoothelin (SMTN), transcript variant 2, mRNA | SMTN      |          |          | 1.14     | 0.88     | 1.14       |      | 2        | 2.1        | 8.27E-09  |
| Q96NL3-1   | Zinc finger protein 599                                                                                             | ZNF599    | 1.14     |          |          |          | 1.14       |      | 2        | 3.4        | 2.75E-02  |
| Q8N567     | Zinc finger CCHC domain-containing protein 9                                                                        | ZCCHC9    |          | 1.14     |          |          | 1.14       |      | 2        | 8.9        | 6.62E-05  |
| P15104     | Glutamate decarboxylase                                                                                             | GLNS      | 1.14     |          |          |          | 1.14       |      | 5        | 15         | 1.00E-144 |
| O75880     | Protein SCO1 homolog, mitochondrial                                                                                 | SCO1      | 1.18     |          | 1.10     | 0.91     | 1.14       | 0.06 | 4        | 18         | 1.17E-10  |
| B1B5P7     | N-acylsphingosine amidohydrolase 1                                                                                  | ASAH1     | 1.19     |          | 1.09     | 0.92     | 1.14       | 0.07 | 3        | 15         | 1.97E-11  |
| Q96C01     | Protein FAM136A                                                                                                     | FAM136A   | 1.19     | 1.09     |          |          | 1.14       | 0.07 | 3        | 15         | 9.46E-17  |
| Q05048     | CF-1 50 kDa subunit                                                                                                 | CSTF1     | 1.19     | 1.09     |          |          | 1.14       | 0.07 | 4        | 10         | 1.27E-32  |
| O00422     | 18 kDa Sin3-associated polypeptide                                                                                  | GIG38     | 1.20     | 1.08     |          |          | 1.14       | 0.08 | 9        | 52         | 3.43E-89  |
| Q969Q0     | 60S ribosomal protein L36a-like                                                                                     | RPL36AL   | 1.23     | 1.05     |          |          | 1.14       | 0.13 | 6        | 30         | 3.19E-24  |
| Q9BX4      | Protein FAM61B                                                                                                      | C20orf4   | 1.31     |          | 0.97     | 1.03     | 1.14       | 0.24 | 3        | 12         | 1.84E-31  |

| UniProt ID | Protein_Name                                                                                                                  | Gene Name | F1 (L/H) | F2 (L/H) | R1 (H/L) | R1 (L/H) | Mean (T/U) | S.D. | Pep. No. | %Seq. Cov. | PEP       |
|------------|-------------------------------------------------------------------------------------------------------------------------------|-----------|----------|----------|----------|----------|------------|------|----------|------------|-----------|
| 0-1        |                                                                                                                               | 0         |          |          |          |          |            |      |          |            |           |
| Q96EY1-1   | DnaJ homolog subfamily A member 3, mitochondrial                                                                              | DNAJA3    | 1.34     | 1.27     | 0.81     | 1.23     | 1.14       | 0.29 | 4        | 14         | 1.79E-52  |
| O75152     | Zinc finger CCCH domain-containing protein 11A                                                                                | KIAA0663  | 1.01     | 1.16     | 1.26     | 0.79     | 1.14       | 0.13 | 13       | 22         | 1.89E-117 |
| Q14676-1   | Mediator of DNA damage checkpoint protein 1                                                                                   | KIAA0170  | 1.27     | 1.18     | 0.98     | 1.02     | 1.14       | 0.15 | 25       | 23         | 4.47E-187 |
| Q9NRV9     | Heme-binding protein 1                                                                                                        | HBP1      | 1.07     | 1.29     | 1.07     | 0.93     | 1.14       | 0.13 | 5        | 33         | 5.97E-83  |
| Q9H098-2   | Protein FAM107B                                                                                                               | C10orf45  | 1.19     |          | 1.10     | 0.91     | 1.15       | 0.06 | 2        | 7.8        | 5.23E-15  |
| O43482     | Cancer/testis antigen 86                                                                                                      | MIS18B    | 1.02     | 1.27     |          |          | 1.15       | 0.18 | 2        | 17         | 2.28E-40  |
| Q16576     | Histone acetyltransferase type B subunit 2                                                                                    | RBAP46    | 1.30     | 0.99     |          |          | 1.15       | 0.22 | 11       | 28         | 2.99E-87  |
| Q9Y6D5     | Brefeldin A-inhibited guanine nucleotide-exchange protein 2                                                                   | ARFGEF2   | 1.34     |          | 0.95     | 1.05     | 1.15       | 0.28 | 3        | 3.2        | 9.84E-07  |
| Q13257     | Mitotic arrest deficient 2-like protein 1                                                                                     | MAD2      |          | 1.40     | 0.89     | 1.12     | 1.15       | 0.36 | 4        | 17         | 1.25E-04  |
| Q9Y399     | 28S ribosomal protein S2, mitochondrial                                                                                       | CGI-91    |          | 0.87     | 1.42     | 0.70     | 1.15       | 0.39 | 3        | 8.8        | 6.74E-06  |
| Q9BRP8-1   | Partner of Y14 and mago                                                                                                       | PYM       | 1.02     | 1.23     | 1.19     | 0.84     | 1.15       | 0.11 | 6        | 53         | 2.76E-89  |
| Q92900-1   | ATP-dependent helicase RENT1                                                                                                  | KIAA0221  | 1.12     | 1.29     | 1.03     | 0.97     | 1.15       | 0.13 | 32       | 31         | 2.72E-181 |
| A6NHQ2     | rRNA/tRNA 2-O-methyltransferase fibrillar-like protein 1                                                                      | FBLL1     | 1.23     | 1.51     | 0.70     | 1.43     | 1.15       | 0.41 | 2        | 6.6        | 9.38E-13  |
| Q13057-2   | Bifunctional coenzyme A synthase                                                                                              | COASY     | 1.17     |          | 1.13     | 0.88     | 1.15       | 0.03 | 3        | 6.4        | 1.35E-25  |
| B4DU42     | cDNA FLJ56153, highly similar to Homo sapiens transforming growth factor beta regulator 4 (TBRG4), transcript variant 1, mRNA | CPR2      |          | 1.21     | 1.09     | 0.92     | 1.15       | 0.08 | 2        | 4.8        | 4.48E-40  |
| P55795     | Heterogeneous nuclear ribonucleoprotein H                                                                                     | FTP3      | 1.22     |          | 1.08     | 0.93     | 1.15       | 0.10 | 11       | 30         | 6.46E-265 |
| O75525-1   | KH domain-containing, RNA-binding, signal transduction-associated protein 3                                                   | KHDRBS3   | 1.05     | 1.25     |          |          | 1.15       | 0.14 | 4        | 9.8        | 7.98E-05  |
| Q96BR5     | Hcp beta-lactamase-like protein C1orf163                                                                                      | C1orf163  | 0.94     |          | 1.36     | 0.74     | 1.15       | 0.30 | 4        | 19         | 1.09E-08  |
| P46063     | ATP-dependent DNA helicase Q1                                                                                                 | RECQ1     |          | 0.88     | 1.42     | 0.70     | 1.15       | 0.38 | 5        | 7.6        | 3.87E-22  |

| UniProt ID | Protein_Name                                        | Gene Name | F1 (L/H) | F2 (L/H) | R1 (H/L) | R1 (L/H) | Mean (T/U) | S.D. | Pep. No. | %Seq. Cov. | PEP       |
|------------|-----------------------------------------------------|-----------|----------|----------|----------|----------|------------|------|----------|------------|-----------|
| P42695     | Condensin-2 complex subunit D3                      | CAPD3     | 1.55     |          | 0.75     | 1.33     | 1.15       | 0.57 | 7        | 7.5        | 4.43E-126 |
| Q92558     | Wiskott-Aldrich syndrome protein family member 4    | SCAR2     |          |          | 1.15     | 0.87     | 1.15       |      | 2        | 4.2        | 1.99E-28  |
| Q99728     | BRCA1-associated RING domain protein 1              | BARD1     |          |          | 1.15     | 0.87     | 1.15       |      | 2        | 3.5        | 4.22E-03  |
| Q9HBM6     | Neuronal cell death-related protein 7               | TAF9B     |          |          | 1.15     | 0.87     | 1.15       |      | 2        | 14         | 4.26E-04  |
| Q9NPJ3     | Acyl-coenzyme A thioesterase 13                     | ACOT13    | 1.15     |          |          |          | 1.15       |      | 2        | 11         | 3.27E-10  |
| P61457     | 4-alpha-hydroxy-tetrahydropterin dehydratase        | DCOH      | 1.15     |          |          |          | 1.15       |      | 2        | 17         | 9.32E-03  |
| Q8N4P3-1   | HD domain-containing protein 3                      | HDDC3     | 1.15     |          |          |          | 1.15       |      | 2        | 16         | 1.56E-06  |
| Q71UM5     | 40S ribosomal protein S27-like                      | RPS27L    | 1.15     |          |          |          | 1.15       |      | 3        | 38         | 1.41E-17  |
| Q9Y2W1     | Thyroid hormone receptor-associated protein 3       | THRAP3    | 1.14     | 1.22     | 1.09     | 0.92     | 1.15       | 0.07 | 26       | 27         | 9.72E-201 |
| Q13733-1   | Sodium pump subunit alpha-4                         | ATP1A4    | 0.97     | 1.02     | 1.46     | 0.68     | 1.15       | 0.27 | 7        | 10         | 1.42E-20  |
| P84085     | ADP-ribosylation factor 5                           | ARF5      | 1.14     | 1        | 1.32     | 0.76     | 1.15       | 0.16 | 6        | 31         | 2.07E-19  |
| O75340     | Apoptosis-linked gene 2 protein                     | ALG2      | 0.93     | 1.48     | 1.05     | 0.95     | 1.15       | 0.29 | 7        | 55         | 7.75E-129 |
| Q9NZJ9-1   | Diadenosine 5,5-P1,P6-hexaphosphate hydrolase 2     | DIPP2     | 0.93     | 1.53     | 1        | 1.00     | 1.15       | 0.33 | 4        | 22         | 1.56E-31  |
| Q58FG1     | Heat shock 90 kDa protein 1 alpha-like 2            | HSP90AA4P | 1.22     | 1.31     | 0.93     | 1.08     | 1.15       | 0.20 | 3        | 7.4        | 1.40E-10  |
| P26232-1   | Alpha N-catenin                                     | CAPR      | 1.16     |          | 1.15     | 0.87     | 1.16       | 0.01 | 2        | 3.7        | 2.11E-65  |
| Q16566     | Calcium/calmodulin-dependent protein kinase type IV | CAMK4     |          | 1.29     | 1.02     | 0.98     | 1.16       | 0.19 | 2        | 4.9        | 1.49E-27  |
| O95487-1   | Protein transport protein Sec24B                    | SEC24B    | 1.29     |          | 1.02     | 0.98     | 1.16       | 0.19 | 3        | 4.9        | 7.15E-26  |
| A6NLK4     | 35-alpha calcimedien                                | ANX3      |          | 1.01     | 1.30     | 0.77     | 1.16       | 0.21 | 2        | 8.4        | 5.17E-07  |
| Q8WUQ7-2   | Cactin                                              | C19orf29  | 0.93     |          | 1.38     | 0.72     | 1.16       | 0.32 | 2        | 4.3        | 2.13E-30  |
| Q14980-2   | Nuclear mitotic apparatus protein 1                 | NUMA      |          | 0.89     | 1.42     | 0.70     | 1.16       | 0.37 | 80       | 45         | 0.00E+00  |
| P26639     | Threonine--tRNA ligase                              | TARS      | 1.16     | 1.16     | 1.15     | 0.87     | 1.16       | 0.01 | 26       | 41         | 2.77E-240 |
| P36776     | Lon protease homolog, mitochondrial                 | LONP1     | 1.08     | 1.17     | 1.22     | 0.82     | 1.16       | 0.07 | 36       | 46         | 0.00E+00  |
| Q9NZL9-1   | DTDP-4-keto-6-deoxy-D-glucose 4-reductase           | MAT2B     | 1.26     | 1.37     | 0.84     | 1.19     | 1.16       | 0.28 | 11       | 40         | 1.32E-111 |

| UniProt ID | Protein_Name                                         | Gene Name       | F1 (L/H) | F2 (L/H) | R1 (H/L) | R1 (L/H) | Mean (T/U) | S.D. | Pep. No. | %Seq. Cov. | PEP       |
|------------|------------------------------------------------------|-----------------|----------|----------|----------|----------|------------|------|----------|------------|-----------|
| Q9BZJ0-1   | Crooked neck homolog                                 | CGI-201         | 1.12     | 1.25     | 1.10     | 0.91     | 1.16       | 0.08 | 8        | 11         | 1.09E-112 |
| Q9H3P7     | Acyl-CoA-binding domain-containing protein 3         | ACBD3           | 1.26     | 1.02     | 1.19     | 0.84     | 1.16       | 0.12 | 5        | 15         | 1.62E-137 |
| P06748-1   | Nucleolar phosphoprotein B23                         | NPM             | 1.47     | 1.36     | 0.64     | 1.56     | 1.16       | 0.45 | 15       | 60         | 0.00E+00  |
| Q9NPF5     | DNA methyltransferase 1-associated protein 1         | DMAP1           | 1.18     | 1.14     |          |          | 1.16       | 0.03 | 2        | 6.6        | 2.04E-14  |
| Q8IYB3-2   | Ser/Arg-related nuclear matrix protein               | SRM160          | 1.26     | 1.25     | 0.97     | 1.03     | 1.16       | 0.16 | 5        | 9.3        | 5.40E-26  |
| P26583     | High mobility group protein 2                        | HMG2            | 1.01     | 1.08     | 1.39     | 0.72     | 1.16       | 0.20 | 20       | 67         | 1.43E-190 |
| Q9BVK6     | Glycoprotein 25L2                                    | GP25L2          | 1.38     | 1.26     | 0.84     | 1.19     | 1.16       | 0.28 | 7        | 25         | 1.29E-62  |
| Q9BU76-1   | Multiple myeloma tumor-associated protein 2          | C1orf35         | 1.50     | 0.94     | 1.04     | 0.96     | 1.16       | 0.30 | 4        | 16         | 5.12E-33  |
| P05198     | Eukaryotic translation initiation factor 2 subunit 1 | EIF2A           | 1.42     | 1.38     | 0.68     | 1.47     | 1.16       | 0.42 | 21       | 65         | 0.00E+00  |
| P78559     | MAP1 light chain LC2                                 | MAP1A           | 1.48     | 1.41     | 0.59     | 1.69     | 1.16       | 0.49 | 30       | 15         | 1.21E-208 |
| Q92793     | CREB-binding protein                                 | CBP             |          |          | 1.16     | 0.86     | 1.16       |      | 3        | 1.6        | 4.78E-07  |
| C9J837     | Putative uncharacterized protein RAB3GAP1            | RAB3GAP1        |          |          | 1.16     | 0.86     | 1.16       |      | 4        | 5.8        | 4.65E-19  |
| P41236     | Protein phosphatase inhibitor 2                      | IPP2            | 1.16     |          |          |          | 1.16       |      | 2        | 12         | 3.25E-06  |
| Q68D91-1   | Metallo-beta-lactamase domain-containing protein 2   | MBLAC2          |          | 1.16     |          |          | 1.16       |      | 2        | 5.4        | 6.21E-05  |
| Q9H3G5     | Carboxypeptidase, vitellogenic-like                  | CPVL            |          | 1.16     |          |          | 1.16       |      | 2        | 4.8        | 1.48E-03  |
| O95613     | Kendrin                                              | KIAA0402        |          | 1.16     |          |          | 1.16       |      | 2        | 0.7        | 1.27E-03  |
| B1AK40     | Fumarylacetoacetate hydrolase domain containing 1    | AC012180.10-003 | 1.16     |          |          |          | 1.16       |      | 2        | 15         | 1.67E-14  |
| A2A2Q9     | Chromosome 20 open reading frame 4                   | C20orf4         |          | 1.16     |          |          | 1.16       |      | 2        | 4          | 1.74E-08  |
| Q9H061     | Transmembrane protein 126A                           | TMEM126A        | 1.16     |          |          |          | 1.16       |      | 4        | 29         | 2.46E-44  |
| P30042-1   | ES1 protein homolog, mitochondrial                   | C21orf33        | 1.21     | 1.11     |          |          | 1.16       | 0.07 | 7        | 53         | 7.40E-95  |
| Q02447-1   | SPR-2                                                | SP3             |          | 1.04     | 1.28     | 0.78     | 1.16       | 0.17 | 3        | 2.9        | 6.63E-11  |
| Q9Y5J9     | DDP-like protein                                     | DDP2            | 1.04     | 1.28     |          |          | 1.16       | 0.17 | 3        | 27         | 2.08E-23  |
| Q9BQ75     | Uncharacterized protein C3orf26                      | C3orf26         | 0.97     | 1.35     |          |          | 1.16       | 0.27 | 2        | 7.5        | 5.43E-03  |
| Q9Y3Y2-3   | Uncharacterized protein C1orf77                      | C1orf77         | 1.12     | 1.22     | 1.15     | 0.87     | 1.16       | 0.05 | 4        | 21         | 4.76E-121 |

| UniProt ID | Protein_Name                                                                             | Gene Name        | F1 (L/H) | F2 (L/H) | R1 (H/L) | R1 (L/H) | Mean (T/U) | S.D. | Pep. No. | %Seq. Cov. | PEP       |
|------------|------------------------------------------------------------------------------------------|------------------|----------|----------|----------|----------|------------|------|----------|------------|-----------|
| Q96GQ7     | DEAD box protein 27                                                                      | DDX27            | 1.18     | 1.21     | 1.10     | 0.91     | 1.16       | 0.06 | 14       | 19         | 8.83E-158 |
| Q00577     | Purine-rich single-stranded DNA-binding protein alpha                                    | PUR1             | 1.22     | 1.19     | 1.08     | 0.93     | 1.16       | 0.07 | 5        | 21         | 2.31E-89  |
| Q9UBB9-1   | Septin and tuftelin-interacting protein 1                                                | HSPC006          | 1.07     | 1.13     | 1.29     | 0.78     | 1.16       | 0.11 | 5        | 6.7        | 5.65E-21  |
| Q10567-1   | Adapter-related protein complex 1 subunit beta-1                                         | ADTB1            | 1.35     | 1.17     | 0.97     | 1.03     | 1.16       | 0.19 | 19       | 21         | 8.92E-185 |
| Q9UPT8     | Zinc finger CCCH domain-containing protein 4                                             | C19orf7          | 1.11     | 1.43     | 0.95     | 1.05     | 1.16       | 0.24 | 13       | 18         | 3.17E-72  |
| Q16763     | E2-EPF                                                                                   | E2EPF            | 1.32     | 1.45     | 0.72     | 1.39     | 1.16       | 0.39 | 6        | 38         | 5.82E-67  |
| Q76FK4-2   | Nucleolar protein 8                                                                      | C9orf34          | 1.17     | 1.59     | 0.73     | 1.37     | 1.16       | 0.43 | 3        | 3.9        | 4.16E-22  |
| Q6PKG0-1   | La ribonucleoprotein domain family member 1                                              | KIAA0731         | 1.49     | 1.44     | 0.56     | 1.79     | 1.16       | 0.52 | 18       | 24         | 5.34E-96  |
| Q4VY20     | Tyrosine 3-monooxygenase/tryptophan 5-monooxygenase activation protein, beta polypeptide | RP1-148E22.1-003 | 1.10     |          | 1.23     | 0.81     | 1.17       | 0.09 | 9        | 87         | 2.70E-63  |
| Q9UKL0     | Protein CoREST                                                                           | KIAA0071         |          | 1.24     | 1.09     | 0.92     | 1.17       | 0.11 | 2        | 5.8        | 1.59E-17  |
| Q8IU81     | Interferon regulatory factor 2-binding protein 1                                         | IRF2BP1          | 1.21     | 1.22     | 1.07     | 0.93     | 1.17       | 0.08 | 8        | 22         | 7.02E-57  |
| Q7L2J0     | 7SK snRNA methylphosphate capping enzyme                                                 | BCDIN3           | 1.27     | 1.16     | 1.07     | 0.93     | 1.17       | 0.10 | 3        | 9.9        | 1.70E-07  |
| P61006     | Oncogene c-mel                                                                           | MEL              | 1.07     | 1.35     | 1.08     | 0.93     | 1.17       | 0.16 | 8        | 40         | 2.06E-235 |
| P07814     | Bifunctional aminoacyl-tRNA synthetase                                                   | EPRS             | 1.18     | 1.35     | 0.97     | 1.03     | 1.17       | 0.19 | 65       | 56         | 0.00E+00  |
| Q6L8Q7-1   | 2,5-phosphodiesterase 12                                                                 | PDE12            | 1.40     | 1.17     | 0.93     | 1.08     | 1.17       | 0.24 | 4        | 13         | 9.44E-45  |
| Q7Z7K6-1   | Centromere protein V                                                                     | CENPV            | 1.32     | 1.30     | 0.88     | 1.14     | 1.17       | 0.25 | 5        | 30         | 2.51E-96  |
| Q8IXJ6-1   | NAD-dependent deacetylase sirtuin-2                                                      | SIR2L            | 1.17     |          | 1.17     | 0.85     | 1.17       | 0.00 | 2        | 8.5        | 2.25E-05  |
| Q9GZY8-1   | Mitochondrial fission factor                                                             | AD030            | 1.15     |          | 1.19     | 0.84     | 1.17       | 0.03 | 2        | 11         | 5.57E-08  |
| P33992     | CDC46 homolog                                                                            | CDC46            | 1.21     | 1.22     | 1.08     | 0.93     | 1.17       | 0.08 | 28       | 45         | 5.92E-96  |
| Q9GZT6-1   | Coiled-coil domain-containing protein 90B, mitochondrial                                 | CCDC90B          | 1.24     | 1.10     |          |          | 1.17       | 0.10 | 2        | 11         | 3.09E-05  |
| Q6FI13     | Histone H2A type 2-A                                                                     | H2AFO            | 1.02     |          | 1.32     | 0.76     | 1.17       | 0.21 | 11       | 60         | 0.00E+00  |
| Q8TAD8     | FHA domain-containing protein SNIP1                                                      | SNIP1            | 0.95     | 0.87     | 1.69     | 0.59     | 1.17       | 0.45 | 3        | 7.6        | 3.89E-67  |

| UniProt ID | Protein_Name                                                 | Gene Name       | F1 (L/H) | F2 (L/H) | R1 (H/L) | R1 (L/H) | Mean (T/U) | S.D. | Pep. No. | %Seq. Cov. | PEP       |
|------------|--------------------------------------------------------------|-----------------|----------|----------|----------|----------|------------|------|----------|------------|-----------|
| P68032     | Actin, alpha cardiac muscle 1                                | ACTC            |          |          | 1.17     | 0.85     | 1.17       |      | 20       | 53         | 9.39E-188 |
| Q9UHA4     | MEK-binding partner 1                                        | MAP2K1IP1       | 1.17     |          |          |          | 1.17       |      | 2        | 36         | 8.97E-06  |
| Q9NWS0     | Nucleolar protein 17 homolog                                 | NOP17           | 1.17     |          |          |          | 1.17       |      | 2        | 14         | 1.98E-18  |
| P21953     | 2-oxoisovalerate dehydrogenase subunit beta, mitochondrial   | BCKDHB          | 1.17     |          |          |          | 1.17       |      | 3        | 14         | 1.11E-13  |
| A8MYU1     | Adenosylhomocysteinase                                       | AHCYL1          |          | 1.17     |          |          | 1.17       |      | 3        | 5.1        | 3.63E-04  |
| Q9BV19     | Uncharacterized protein C1orf50                              | C1orf50         | 1.17     |          |          |          | 1.17       |      | 4        | 36         | 4.22E-43  |
| Q8NF33     | FLJ00369 protein                                             | FLJ00369        | 1.17     |          |          |          | 1.17       |      | 9        | 14         | 7.83E-23  |
| Q9P032     | Hormone-regulated proliferation-associated protein of 20 kDa | C6orf66         | 1.09     | 1.15     | 1.27     | 0.79     | 1.17       | 0.09 | 7        | 43         | 1.28E-43  |
| Q7L0Y3     | HBV pre-S2 trans-regulated protein 2                         | MRPP1           | 1.06     | 1.10     | 1.35     | 0.74     | 1.17       | 0.16 | 2        | 8.7        | 4.32E-50  |
| B0V043     | Valyl-tRNA synthetase                                        | DAAP-21F2.2-001 | 1.35     | 1.45     | 0.72     | 1.39     | 1.17       | 0.40 | 23       | 26         | 1.71E-147 |
| B9VP24     | 60 kDa chaperonin                                            | HSPD1           | 1.19     | 1.23     | 1.10     | 0.91     | 1.17       | 0.07 | 3        | 12         | 1.99E-13  |
| Q05519     | Arginine-rich 54 kDa nuclear protein                         | SFRS11          | 1.21     | 1.33     | 0.98     | 1.02     | 1.17       | 0.18 | 5        | 15         | 7.72E-45  |
| C9JL30     | Putative uncharacterized protein SUMF2                       | SUMF2           | 1.29     | 1.30     | 0.93     | 1.08     | 1.17       | 0.21 | 6        | 25         | 8.68E-55  |
| Q9HAU5-1   | Nonsense mRNA reducing factor 2                              | KIAA1408        | 1.30     | 1.36     | 0.86     | 1.16     | 1.17       | 0.27 | 6        | 6.1        | 1.16E-22  |
| P49588     | Alanine--tRNA ligase                                         | AARS            | 0.82     | 0.85     | 1.85     | 0.54     | 1.17       | 0.59 | 38       | 51         | 0.00E+00  |
| O95478     | Hairy cell leukemia protein 1                                | HUSSY-29        | 1.56     | 1.18     | 0.78     | 1.28     | 1.17       | 0.39 | 3        | 13         | 1.21E-08  |
| P50542-2   | Peroxin-5                                                    | PEX5            |          | 1.08     | 1.27     | 0.79     | 1.18       | 0.13 | 2        | 7.5        | 1.91E-04  |
| C9J3F9     | Putative uncharacterized protein PPAN                        | PPAN            | 1.22     | 1.33     | 0.98     | 1.02     | 1.18       | 0.18 | 3        | 4.2        | 7.12E-10  |
| Q9BRT9-1   | DNA replication complex GINS protein SLD5                    | GINS4           | 1.14     | 1.47     | 0.92     | 1.09     | 1.18       | 0.28 | 6        | 32         | 4.76E-31  |
| Q96QC0     | MHC class I region proline-rich protein CAT53                | CAT53           | 1.18     | 1.27     | 1.08     | 0.93     | 1.18       | 0.10 | 8        | 13         | 2.04E-49  |
| O96011     | Peroxin-11B                                                  | PEX11B          | 1.16     | 1.20     | 1.18     | 0.85     | 1.18       | 0.02 | 4        | 16         | 6.00E-32  |
| O43633     | Charged multivesicular body protein 2a                       | BC2             | 1.24     | 1.13     | 1.17     | 0.85     | 1.18       | 0.06 | 4        | 17         | 1.22E-27  |
| Q9Y6A4     | Transcription factor IIB                                     | C16orf80        | 1.25     | 1.15     | 1.14     | 0.88     | 1.18       | 0.06 | 7        | 38         | 1.75E-221 |

| UniProt ID | Protein_Name                                                        | Gene Name | F1 (L/H) | F2 (L/H) | R1 (H/L) | R1 (L/H) | Mean (T/U) | S.D. | Pep. No. | %Seq. Cov. | PEP       |
|------------|---------------------------------------------------------------------|-----------|----------|----------|----------|----------|------------|------|----------|------------|-----------|
| P30040     | Endoplasmic reticulum resident protein 28                           | C12orf8   | 1.26     | 1.29     | 0.99     | 1.01     | 1.18       | 0.17 | 12       | 47         | 4.03E-114 |
| P07203     | Cellular glutathione peroxidase                                     | GPX1      | 1.25     | 1.39     | 0.90     | 1.11     | 1.18       | 0.25 | 4        | 37         | 1.47E-24  |
| Q9Y450-1   | ERFS                                                                | HBS1      | 1.59     | 0.89     | 1.06     | 0.94     | 1.18       | 0.37 | 5        | 9.9        | 2.23E-19  |
| Q9H0A0     | N-acetyltransferase 10                                              | ALP       | 1.26     | 1.5      | 0.78     | 1.28     | 1.18       | 0.37 | 20       | 27         | 3.26E-139 |
| Q9BUP0     | EF-hand domain-containing protein 1                                 | EFHD1     | 0.41     |          | 1.95     | 0.51     | 1.18       | 1.09 | 5        | 32         | 6.84E-51  |
| Q8TD16-2   | Protein bicaudal D homolog 2                                        | BICD2     |          | 1.18     |          |          | 1.18       |      | 2        | 2.6        | 1.96E-07  |
| P56556     | Complex I-B14                                                       | LYRM6     | 1.18     |          |          |          | 1.18       |      | 2        | 12         | 4.68E-03  |
| Q86X83     | COMM domain-containing protein 2                                    | COMM D2   | 1.11     |          | 1.25     | 0.80     | 1.18       | 0.10 | 3        | 17         | 1.65E-09  |
| B4DJ38     | cDNA FLJ56092, highly similar to Pentatricopeptide repeat protein 1 | PTCD1     | 1.05     |          | 1.31     | 0.76     | 1.18       | 0.18 | 2        | 3.2        | 6.01E-26  |
| Q96QR8     | Purine-rich element-binding protein B                               | PURB      | 1.21     | 1.12     | 1.22     | 0.82     | 1.18       | 0.06 | 8        | 28         | 2.40E-44  |
| Q9Y580     | RNA-binding motif protein 7                                         | RBM7      | 1.28     | 0.94     | 1.33     | 0.75     | 1.18       | 0.21 | 2        | 18         | 2.26E-31  |
| Q8N983-4   | 39S ribosomal protein L43, mitochondrial                            | MRPL43    | 1.16     |          | 1.21     | 0.83     | 1.19       | 0.04 | 3        | 20         | 2.37E-15  |
| Q6P3W7     | Coated vesicle-associated kinase of 104 kDa                         | CVAK104   |          | 1.44     | 0.93     | 1.08     | 1.19       | 0.36 | 2        | 3.2        | 1.40E-04  |
| Q9UKV3-1   | Apoptotic chromatin condensation inducer in the nucleus             | ACIN1     | 1.19     | 1.17     | 1.20     | 0.83     | 1.19       | 0.02 | 36       | 31         | 1.47E-286 |
| Q96EB6     | NAD-dependent deacetylase sirtuin-1                                 | SIR2L1    | 1.28     | 1.13     | 1.15     | 0.87     | 1.19       | 0.08 | 14       | 31         | 5.94E-240 |
| Q13426-1   | DNA repair protein XRCC4                                            | XRCC4     | 0.99     | 1.17     | 1.40     | 0.71     | 1.19       | 0.21 | 3        | 10         | 3.42E-16  |
| O95336     | 6-phosphogluconolactonase                                           | PGLS      | 1.30     | 1.47     | 0.79     | 1.27     | 1.19       | 0.35 | 12       | 62         | 1.05E-220 |
| Q9P2J5     | Leucine--tRNA ligase                                                | KIAA1352  | 1.35     | 1.43     | 0.78     | 1.28     | 1.19       | 0.35 | 22       | 23         | 0.00E+00  |
| Q71U36     | Alpha-tubulin 3                                                     | TUBA1A    | 0.91     | 0.88     | 1.77     | 0.56     | 1.19       | 0.51 | 33       | 76         | 0.00E+00  |
| Q8N183     | Mimitin, mitochondrial                                              | NDUF A12L | 1.15     | 1.23     |          |          | 1.19       | 0.06 | 4        | 40         | 8.33E-34  |
| Q9NZ08-2   | Adipocyte-derived leucine aminopeptidase                            | APPILS    |          | 1.13     | 1.25     | 0.80     | 1.19       | 0.08 | 4        | 4.4        | 2.23E-09  |
| Q8WUY1     | Mesenchymal stem cell protein DSCD75                                | C8orf55   | 1.12     | 1.26     |          |          | 1.19       | 0.10 | 4        | 18         | 5.43E-42  |
| Q9HBH1     | Peptide deformylase, mitochondrial                                  | PDF       | 1.17     | 1.09     | 1.31     | 0.76     | 1.19       | 0.11 | 4        | 33         | 3.51E-78  |
| Q96AB      | Isochorismatase                                                     | ISOC2     | 1.09     |          | 1.29     | 0.78     | 1.19       | 0.14 | 6        | 48         | 1.03E-143 |



| UniProt ID | Protein_Name                                                                                                  | Gene Name | F1 (L/H) | F2 (L/H) | R1 (H/L) | R1 (L/H) | Mean (T/U) | S.D. | Pep. No. | %Seq. Cov. | PEP       |
|------------|---------------------------------------------------------------------------------------------------------------|-----------|----------|----------|----------|----------|------------|------|----------|------------|-----------|
| 3-2        | domain-containing protein 2, mitochondrial                                                                    |           |          |          |          |          |            |      |          |            |           |
| Q9UHR6     | Zinc finger HIT domain-containing protein 2                                                                   | C11orf5   |          | 1.33     | 1.05     | 0.95     | 1.19       | 0.20 | 2        | 5.7        | 1.08E-05  |
| P56192     | Methionine--tRNA ligase                                                                                       | MARS      | 1.38     | 1.27     | 0.92     | 1.09     | 1.19       | 0.24 | 18       | 29         | 4.95E-119 |
| Q9Y5Q9-1   | General transcription factor 3C polypeptide 3                                                                 | GTF3C3    |          | 1.49     | 0.89     | 1.12     | 1.19       | 0.42 | 2        | 2.7        | 7.67E-06  |
| Q15392     | 24-dehydrocholesterol reductase                                                                               | DHCR24    |          | 1.50     | 0.88     | 1.14     | 1.19       | 0.44 | 2        | 4.1        | 1.18E-07  |
| Q14562     | ATP-dependent RNA helicase DHX8                                                                               | DDX8      |          | 1.54     | 0.84     | 1.19     | 1.19       | 0.49 | 4        | 4.7        | 1.17E-05  |
| O76024     | Wolframin                                                                                                     | WFS1      |          |          | 1.19     | 0.84     | 1.19       |      | 2        | 3          | 3.56E-17  |
| O43819     | Protein SCO2 homolog, mitochondrial                                                                           | SCO2      |          | 1.19     |          |          | 1.19       |      | 2        | 6.8        | 1.34E-04  |
| Q9GZP4-1   | UPF0424 protein C1orf128                                                                                      | AD039     | 1.37     | 1.16     | 1.04     | 0.96     | 1.19       | 0.17 | 6        | 33         | 4.00E-34  |
| O15397     | Importin-8                                                                                                    | IPO8      | 1.37     | 1.27     | 0.93     | 1.08     | 1.19       | 0.23 | 4        | 4.6        | 3.64E-22  |
| Q9UK59-1   | Lariat debranching enzyme                                                                                     | DBR1      | 1.27     | 1.27     | 1.04     | 0.96     | 1.19       | 0.13 | 3        | 7.4        | 3.52E-13  |
| B4DEA8     | cDNA FLJ56425, highly similar to Very-long-chain specific acyl-CoA dehydrogenase, mitochondrial (EC 1.3.99.-) | ACADVL    | 1.28     | 1.28     | 1.02     | 0.98     | 1.19       | 0.15 | 15       | 32         | 8.09E-125 |
| Q9H078-1   | Caseinolytic peptidase B protein homolog                                                                      | CLPB      | 1.04     | 1.35     |          |          | 1.20       | 0.22 | 7        | 9.6        | 1.14E-22  |
| Q00059     | Mitochondrial transcription factor 1                                                                          | TCF6      | 0.77     |          | 1.62     | 0.62     | 1.20       | 0.60 | 4        | 15         | 4.04E-15  |
| Q93009     | Deubiquitinating enzyme 7                                                                                     | HAUSP     | 1.49     | 1.38     | 0.72     | 1.39     | 1.20       | 0.42 | 12       | 15         | 7.67E-96  |
| Q12907     | Glycoprotein GP36b                                                                                            | C5orf8    | 1.54     | 1.35     | 0.70     | 1.43     | 1.20       | 0.44 | 5        | 22         | 1.90E-17  |
| Q14061     | Cytochrome c oxidase copper chaperone                                                                         | COX17     | 1.20     | 1.20     |          |          | 1.20       | 0.00 | 2        | 37         | 2.60E-22  |
| P11498     | Pyruvate carboxylase, mitochondrial                                                                           | PC        | 1.19     | 1.17     | 1.24     | 0.81     | 1.20       | 0.04 | 4        | 6.4        | 4.28E-15  |
| O14657     | Torsin family 1 member B                                                                                      | DQ1       | 1.17     |          | 1.23     | 0.81     | 1.20       | 0.04 | 2        | 6.8        | 1.12E-03  |
| Q6SPF0     | Atherin                                                                                                       | SAMD1     | 1.11     | 1.22     | 1.27     | 0.79     | 1.20       | 0.08 | 5        | 17         | 2.14E-17  |
| A7BI36     | p180/ribosome receptor                                                                                        | RRBP1     | 1.10     | 1.27     | 1.23     | 0.81     | 1.20       | 0.09 | 19       | 28         | 8.51E-216 |
| O00154-1   | Acyl-CoA thioesterase 7                                                                                       | ACOT7     | 1.28     | 1.47     | 0.85     | 1.18     | 1.20       | 0.32 | 11       | 30         | 1.08E-101 |
| Q147X3-1   | N-acetyltransferase 12                                                                                        | C14orf35  |          | 1.44     | 0.96     | 1.04     | 1.20       | 0.34 | 2        | 5.8        | 1.73E-05  |
| Q5JTH9-1   | RRP12-like protein                                                                                            | KIAA0690  | 1.36     | 1.48     | 0.76     | 1.32     | 1.20       | 0.39 | 8        | 9.4        | 8.34E-72  |

| UniProt ID | Protein_Name                                                  | Gene Name       | F1 (L/H) | F2 (L/H) | R1 (H/L) | R1 (L/H) | Mean (T/U) | S.D. | Pep. No. | %Seq. Cov. | PEP       |
|------------|---------------------------------------------------------------|-----------------|----------|----------|----------|----------|------------|------|----------|------------|-----------|
| P63000-2   | Cell migration-inducing gene 5 protein                        | MIG5            | 1.41     | 1.45     | 0.74     | 1.35     | 1.20       | 0.40 | 10       | 41         | 6.29E-53  |
| P07954-1   | Fumarate hydratase, mitochondrial                             | FH              | 1.42     | 1.51     | 0.67     | 1.49     | 1.20       | 0.46 | 17       | 54         | 5.96E-251 |
| O75208-1   | Ubiquinone biosynthesis protein COQ9, mitochondrial           | C16orf49        |          |          | 1.20     | 0.83     | 1.20       |      | 4        | 27         | 9.51E-77  |
| A8MVZ9     | Fructose-bisphosphate aldolase                                | ALDO C          |          |          | 1.20     | 0.83     | 1.20       |      | 28       | 65         | 0.00E+00  |
| P61244-1   | Class D basic helix-loop-helix protein 4                      | BHLH D4         |          | 1.20     |          |          | 1.20       |      | 2        | 13         | 1.16E-04  |
| Q9UPT5-3   | Exocyst complex component 7                                   | EXO70           | 1.20     |          |          |          | 1.20       |      | 2        | 3.5        | 1.93E-02  |
| Q8NFV4-1   | Abhydrolase domain-containing protein 11                      | ABHD11          |          | 1.20     |          |          | 1.20       |      | 2        | 6.7        | 1.68E-09  |
| Q15643     | Clonal evolution-related gene on chromosome 14 protein        | CEV14           |          | 1.20     |          |          | 1.20       |      | 3        | 1.8        | 1.11E-28  |
| P09497-1   | Clathrin light chain B                                        | CLTB            |          | 1.20     |          |          | 1.20       |      | 3        | 12         | 1.22E-05  |
| Q8IYB8     | ATP-dependent RNA helicase SUPV3L1, mitochondrial             | SUPV3L1         |          | 1.20     |          |          | 1.20       |      | 3        | 4.6        | 4.62E-06  |
| A8MU M1    | Putative uncharacterized protein TSSC1                        | TSSC1           | 1.20     |          |          |          | 1.20       |      | 3        | 9.4        | 1.18E-04  |
| O14561     | Acyl carrier protein, mitochondrial                           | NDUF AB1        | 1.20     |          |          |          | 1.20       |      | 4        | 21         | 1.96E-24  |
| B4DI54     | cDNA FLJ56386, highly similar to Heat shock 70 kDa protein 1L | DAAP-21F2.9-001 |          | 1.20     |          |          | 1.20       |      | 9        | 15         | 2.20E-191 |
| Q9BSD7     | Nucleoside triphosphate phosphohydrolase                      | NTPCR           | 1.2      |          |          |          | 1.20       |      | 11       | 66         | 1.21E-48  |
| O96013-1   | p21-activated kinase 4                                        | KIAA1142        |          | 1.30     | 1.10     | 0.91     | 1.20       | 0.14 | 2        | 2.5        | 1.74E-03  |
| P61020     | Ras-related protein Rab-5B                                    | RAB5B           | 0.83     | 0.99     | 1.79     | 0.56     | 1.20       | 0.51 | 6        | 34         | 3.97E-48  |
| Q93084-6   | Calcium pump 3                                                | ATP2A3          | 1.26     |          | 1.15     | 0.87     | 1.21       | 0.08 | 6        | 7.4        | 2.52E-81  |
| Q6PI26     | Protein SHQ1 homolog                                          | SHQ1            | 1.55     |          | 0.86     | 1.16     | 1.21       | 0.49 | 4        | 13         | 3.74E-07  |
| P43362     | Cancer/testis antigen 1.9                                     | MAGE9           | 0.80     |          | 1.61     | 0.62     | 1.21       | 0.57 | 6        | 23         | 4.55E-130 |
| P34896-1   | Serine hydroxymethyltransferase, cytosolic                    | SHMT1           | 1.27     | 1.24     | 1.11     | 0.90     | 1.21       | 0.09 | 7        | 18         | 7.34E-75  |
| Q6P2Q9     | 220 kDa U5 snRNP-specific protein                             | PRPC8           | 1.22     | 1.39     | 1.01     | 0.99     | 1.21       | 0.19 | 48       | 25         | 3.04E-292 |
| Q9UQ37-1   | 300 kDa nuclear matrix antigen                                | HSPC075         | 1.40     | 1.43     | 0.79     | 1.27     | 1.21       | 0.36 | 23       | 12         | 3.46E-160 |

| UniProt ID | Protein_Name                                                                               | Gene Name         | F1 (L/H) | F2 (L/H) | R1 (H/L) | R1 (L/H) | Mean (T/U) | S.D. | Pep. No. | %Seq. Cov. | PEP       |
|------------|--------------------------------------------------------------------------------------------|-------------------|----------|----------|----------|----------|------------|------|----------|------------|-----------|
| 5-1        |                                                                                            |                   |          |          |          |          |            |      |          |            |           |
| P34897     | Serine hydroxymethyltransferase, mitochondrial                                             | SHMT2             | 1.16     | 1.23     | 1.24     | 0.81     | 1.21       | 0.04 | 20       | 50         | 8.80E-235 |
| Q14165     | Malectin                                                                                   | KIAA0152          | 1.42     | 1.26     | 0.95     | 1.05     | 1.21       | 0.24 | 5        | 20         | 3.67E-32  |
| Q96CX2     | BTB/POZ domain-containing protein KCTD12                                                   | C13orf2           | 1.38     | 1.56     | 0.69     | 1.45     | 1.21       | 0.46 | 7        | 31         | 3.49E-146 |
| Q9H496     | cDNA FLJ77012, highly similar to Homo sapiens interferon responsive gene 15 (IFRG15), mRNA | hCG_1759493       |          |          | 1.21     | 0.83     | 1.21       |      | 2        | 25         | 2.32E-18  |
| Q03111     | Protein ENL                                                                                | ENL               |          |          | 1.21     | 0.83     | 1.21       |      | 2        | 4.3        | 1.97E-04  |
| Q9UMS0     | HIRA-interacting protein 5                                                                 | CGI-33            |          |          | 1.21     | 0.83     | 1.21       |      | 2        | 9.4        | 1.69E-03  |
| Q7L5Y9-1   | Cell proliferation-inducing gene 5 protein                                                 | EMP               |          |          | 1.21     | 0.83     | 1.21       |      | 2        | 6.1        | 5.25E-21  |
| B0S872     | HCG1999928, isoform CRA_b                                                                  | DAAP-218M18.9-001 |          |          | 1.21     | 0.83     | 1.21       |      | 3        | 14         | 7.03E-09  |
| Q9ULH7-1   | Megakaryoblastic leukemia 2                                                                | KIAA1243          |          |          | 1.21     | 0.83     | 1.21       |      | 4        | 5.5        | 3.96E-20  |
| Q96JJ7-1   | Protein disulfide-isomerase TMX3                                                           | KIAA1830          |          |          | 1.21     | 0.83     | 1.21       |      | 6        | 14         | 5.02E-31  |
| P42166     | Lamina-associated polypeptide 2, isoform alpha                                             | LAP1              |          |          | 1.21     | 0.83     | 1.21       |      | 12       | 28         | 1.71E-56  |
| P30825     | Ecotropic retroviral leukemia receptor homolog                                             | ATRC1             | 1.21     |          |          |          | 1.21       |      | 2        | 3.3        | 9.56E-03  |
| O75935-1   | Dynactin complex subunit 22 kDa subunit                                                    | DCTN22            | 1.21     |          |          |          | 1.21       |      | 3        | 23         | 4.00E-16  |
| Q96RS6-1   | Chronic myelogenous leukemia tumor antigen 66                                              | CML66             |          | 1.21     |          |          | 1.21       |      | 3        | 5.3        | 1.79E-14  |
| P21108     | Phosphoribosyl pyrophosphate synthase 1-like 1                                             | PRPS1L1           |          | 1.21     |          |          | 1.21       |      | 4        | 13         | 7.51E-19  |
| P60983     | Glia maturation factor beta                                                                | GMFB              | 1.21     |          |          |          | 1.21       |      | 4        | 42         | 3.50E-37  |
| P54687     | Branched-chain-amino-acid aminotransferase, cytosolic                                      | BCAT1             | 1.22     | 1.5      | 0.92     | 1.09     | 1.21       | 0.29 | 8        | 25         | 2.08E-120 |
| Q9P265-1   | Disco-interacting protein 2 homolog B                                                      | DIP2B             | 1.32     | 1.65     | 0.67     | 1.49     | 1.21       | 0.50 | 2        | 1.6        | 3.25E-19  |
| Q96S19-1   | UPF0585 protein C16orf13                                                                   | C16orf13          | 1.85     | 1.06     | 0.73     | 1.37     | 1.21       | 0.58 | 3        | 16         | 2.17E-19  |
| Q5JPE7     | Nodal modulator 2                                                                          | NOMO2             | 1.25     | 1.18     |          |          | 1.22       | 0.05 | 9        | 8.5        | 1.30E-25  |

| UniProt ID | Protein_Name                                                                                                                      | Gene Name   | F1 (L/H) | F2 (L/H) | R1 (H/L) | R1 (L/H) | Mean (T/U) | S.D. | Pep. No. | %Seq. Cov. | PEP       |
|------------|-----------------------------------------------------------------------------------------------------------------------------------|-------------|----------|----------|----------|----------|------------|------|----------|------------|-----------|
| -1         |                                                                                                                                   |             |          |          |          |          |            |      |          |            |           |
| B4E137     | cDNA FLJ61523, highly similar to Vesicle transport through interaction witht-SNAREs homolog 1A                                    | hCG_1811152 | 1.04     |          | 1.39     | 0.72     | 1.22       | 0.25 | 4        | 23         | 7.69E-90  |
| Q12974-1   | HU-PP-1                                                                                                                           | BM-008      | 1.32     | 1.11     |          |          | 1.22       | 0.15 | 6        | 53         | 7.36E-82  |
| Q96HA7-2   | Inhibitor of kappa B-related protein                                                                                              | IKBR        | 0.93     | 1.50     |          |          | 1.22       | 0.40 | 3        | 2.3        | 1.76E-04  |
| P61081     | NEDD8 carrier protein                                                                                                             | UBC12       | 1.38     | 1.15     | 1.12     | 0.89     | 1.22       | 0.14 | 7        | 39         | 2.11E-150 |
| O75436     | Vacuolar protein sorting-associated protein 26A                                                                                   | VPS26       | 1.27     | 1.17     |          |          | 1.22       | 0.07 | 2        | 9.2        | 7.04E-44  |
| O15446-2   | Antisense to ERCC-1 protein                                                                                                       | ASE1        | 1.52     | 1.40     | 0.74     | 1.35     | 1.22       | 0.42 | 6        | 25         | 3.74E-37  |
| Q6PL24     | Protein TMED8                                                                                                                     | FAM15B      |          |          | 1.22     | 0.82     | 1.22       |      | 2        | 11         | 4.83E-04  |
| Q96RG2-2   | PAS domain-containing serine/threonine-protein kinase                                                                             | KIAA0135    |          |          | 1.22     | 0.82     | 1.22       |      | 2        | 2.7        | 1.30E-07  |
| Q96TC7-1   | Cerebral protein 10                                                                                                               | FAM82A2     |          |          | 1.22     | 0.82     | 1.22       |      | 2        | 8.5        | 6.55E-06  |
| B4DW W2    | cDNA FLJ57641, highly similar to Microcephalin                                                                                    | MCPH1       |          |          | 1.22     | 0.82     | 1.22       |      | 2        | 5.2        | 2.86E-02  |
| Q96B23-1   | Uncharacterized protein C18orf25                                                                                                  | C18orf25    |          |          | 1.22     | 0.82     | 1.22       |      | 3        | 15         | 1.86E-14  |
| P56545-2   | C-terminal-binding protein 2                                                                                                      | CTBP2       |          |          | 1.22     | 0.82     | 1.22       |      | 6        | 5.4        | 2.19E-09  |
| B3KTT6     | cDNA FLJ38699 fis, clone KIDNE2002168, highly similar to Short chain 3-hydroxyacyl-CoA dehydrogenase, mitochondrial (EC 1.1.1.35) | HADH        |          |          | 1.22     | 0.82     | 1.22       |      | 24       | 50         | 9.39E-155 |
| Q9BYG9     | Nucleophosmin (Nucleolar phosphoprotein B23, numatrin)                                                                            | NPM1        |          |          | 1.22     | 0.82     | 1.22       |      | 26       | 88         | 6.63E-303 |
| P55273     | Cyclin-dependent kinase 4 inhibitor D                                                                                             | CDKN2D      |          | 1.22     |          |          | 1.22       |      | 2        | 19         | 5.22E-05  |
| Q99996-6   | AKAP 120-like protein                                                                                                             | AKAP350     |          | 1.22     |          |          | 1.22       |      | 2        | 0.5        | 2.86E-11  |
| Q6Y1H2     | Protein-tyrosine phosphatase-like member B                                                                                        | PTPLB       |          | 1.22     |          |          | 1.22       |      | 2        | 7.9        | 4.97E-05  |
| P62072     | Mitochondrial import inner membrane                                                                                               | TIM10       |          | 1.22     |          |          | 1.22       |      | 3        | 26         | 9.24E-15  |

| UniProt ID | Protein_Name                                                                                               | Gene Name | F1 (L/H) | F2 (L/H) | R1 (H/L) | R1 (L/H) | Mean (T/U) | S.D. | Pep. No. | %Seq. Cov. | PEP       |
|------------|------------------------------------------------------------------------------------------------------------|-----------|----------|----------|----------|----------|------------|------|----------|------------|-----------|
|            | translocase subunit Tim10                                                                                  |           |          |          |          |          |            |      |          |            |           |
| B4E2A6     | cDNA FLJ55508, highly similar to Sad1/unc-84-like protein 2                                                | UNC84 B   | 1.21     | 1.22     | 1.24     | 0.81     | 1.22       | 0.02 | 3        | 7.3        | 6.46E-64  |
| Q96B54-1   | Enzyme-like protein PIT13                                                                                  | C19orf3 7 | 1.31     | 1.60     | 0.76     | 1.32     | 1.22       | 0.43 | 3        | 27         | 5.03E-66  |
| Q93034     | Cullin-5                                                                                                   | CUL5      |          | 0.95     | 1.50     | 0.67     | 1.23       | 0.39 | 3        | 3.7        | 1.09E-04  |
| P06396-1   | Actin-depolymerizing factor                                                                                | GSN       | 1.25     | 1.46     | 0.97     | 1.03     | 1.23       | 0.25 | 4        | 5.2        | 2.14E-31  |
| Q8NI36     | T-cell activation WD repeat-containing protein                                                             | WDR36     | 1.46     | 1.60     | 0.62     | 1.61     | 1.23       | 0.53 | 8        | 11         | 3.28E-51  |
| Q13630     | GDP-4-keto-6-deoxy-D-mannose-3,5-epimerase-4-reductase                                                     | SDR4E 1   | 1.49     | 1.40     | 0.80     | 1.25     | 1.23       | 0.38 | 5        | 17         | 2.63E-42  |
| Q02978     | Mitochondrial 2-oxoglutarate/malate carrier protein                                                        | SLC20 A4  | 1.43     |          | 1.03     | 0.97     | 1.23       | 0.28 | 4        | 15         | 3.73E-50  |
| Q8NFF 5-1  | FAD pyrophosphorylase                                                                                      | FLAD1     | 1.66     |          | 0.80     | 1.25     | 1.23       | 0.61 | 3        | 9.4        | 1.54E-46  |
| Q96EK 7    | Constitutive coactivator of peroxisome proliferator-activated receptor gamma                               | CCPG      |          |          | 1.23     | 0.81     | 1.23       |      | 2        | 2.1        | 1.16E-03  |
| Q13617     | Cullin-2                                                                                                   | CUL2      |          |          | 1.23     | 0.81     | 1.23       |      | 4        | 6.5        | 1.85E-07  |
| Q9NZ7 2    | SCG10-like protein                                                                                         | SCLIP     |          | 1.23     |          |          | 1.23       |      | 2        | 9.4        | 1.69E-03  |
| Q5J8M3-1   | Cell proliferation-inducing gene 17 protein                                                                | HSPC1 84  | 1.23     |          |          |          | 1.23       |      | 2        | 14         | 2.83E-07  |
| Q8IVS2-1   | [Acyl-carrier-protein] malonyltransferase                                                                  | MCAT      | 1.56     | 1.25     | 0.89     | 1.12     | 1.23       | 0.34 | 3        | 13         | 4.35E-57  |
| Q9BU6 1    | NADH dehydrogenase [ubiquinone] 1 alpha subcomplex assembly factor 3                                       | C3orf60   | 1.31     | 1.16     |          |          | 1.24       | 0.11 | 4        | 32         | 3.20E-66  |
| P28907-1   | ADP-ribosyl cyclase 1                                                                                      | CD38      | 1.15     |          | 1.32     | 0.76     | 1.24       | 0.12 | 2        | 9.3        | 3.32E-04  |
| O43493-1   | TGN38 homolog                                                                                              | TGN46     | 1.11     | 1.36     |          |          | 1.24       | 0.18 | 2        | 5.8        | 5.36E-47  |
| B4DPV 7    | cDNA FLJ54534, highly similar to Homo sapiens cysteinyl-tRNA synthetase (CARS), transcript variant 3, mRNA | CARS      | 1.13     | 1.13     | 1.45     | 0.69     | 1.24       | 0.18 | 16       | 24         | 7.39E-158 |
| Q9UNQ 2    | 18S rRNA dimethylase                                                                                       | DIMT1     | 1.22     | 1.26     |          |          | 1.24       | 0.03 | 3        | 8.9        | 1.24E-04  |
| Q96IU4     | Abhydrolase domain-                                                                                        | ABHD1     | 1.30     | 1.22     | 1.20     | 0.83     | 1.24       | 0.05 | 6        | 38         | 1.66E-55  |

| UniProt ID | Protein_Name                                                                                                      | Gene Name | F1 (L/H) | F2 (L/H) | R1 (H/L) | R1 (L/H) | Mean (T/U) | S.D. | Pep. No. | %Seq. Cov. | PEP       |
|------------|-------------------------------------------------------------------------------------------------------------------|-----------|----------|----------|----------|----------|------------|------|----------|------------|-----------|
| -1         | containing protein 14B                                                                                            | 4B        |          |          |          |          |            |      |          |            |           |
| A3KM H1-1  | Uncharacterized protein KIAA0564                                                                                  | KIAA0564  |          | 1.17     | 1.31     | 0.76     | 1.24       | 0.10 | 5        | 2.9        | 3.62E-14  |
| Q6ZN5 5-2  | Zinc finger protein 574                                                                                           | ZNF574    | 1.16     |          | 1.32     | 0.76     | 1.24       | 0.11 | 2        | 3.2        | 2.24E-02  |
| Q9P015     | 39S ribosomal protein L15, mitochondrial                                                                          | HSPC145   | 1.01     |          | 1.47     | 0.68     | 1.24       | 0.33 | 3        | 13         | 4.33E-15  |
| Q9BVG 9    | Phosphatidylserine synthase 2                                                                                     | PSS2      | 1.04     | 1.04     | 1.64     | 0.61     | 1.24       | 0.35 | 2        | 7.8        | 8.50E-06  |
| Q16795     | Complex I-39kD                                                                                                    | NDUF A9   |          |          | 1.24     | 0.81     | 1.24       |      | 2        | 5.8        | 5.61E-04  |
| O75695     | Protein XRP2                                                                                                      | RP2       |          |          | 1.24     | 0.81     | 1.24       |      | 2        | 5.1        | 7.94E-05  |
| Q9H300     | Mitochondrial intramembrane cleaving protease PARL                                                                | PARL      |          |          | 1.24     | 0.81     | 1.24       |      | 2        | 3.4        | 2.76E-04  |
| P54198     | Protein HIRA                                                                                                      | DGCR1     |          |          | 1.24     | 0.81     | 1.24       |      | 2        | 2.2        | 2.13E-04  |
| Q8NCC 3    | 1-O-acylceramide synthase                                                                                         | LYPLA 3   |          |          | 1.24     | 0.81     | 1.24       |      | 2        | 7.5        | 7.70E-07  |
| Q9Y3D 3    | 28S ribosomal protein S16, mitochondrial                                                                          | CGI-132   |          |          | 1.24     | 0.81     | 1.24       |      | 3        | 45         | 3.08E-29  |
| Q86Y91 -2  | Kinesin-like protein KIF18B                                                                                       | KIF18B    |          |          | 1.24     | 0.81     | 1.24       |      | 3        | 4.5        | 1.66E-11  |
| A8K2Y 8    | cDNA FLJ77052, highly similar to Homo sapiens FYN binding protein (FYB-120/130) (FYB), transcript variant 1, mRNA | FYB       |          |          | 1.24     | 0.81     | 1.24       |      | 19       | 34         | 2.72E-120 |
| Q8WW H5    | Probable tRNA pseudouridine synthase 1                                                                            | PUS4      | 1.24     |          |          |          | 1.24       |      | 2        | 6.6        | 9.80E-04  |
| O15067     | Formylglycinamide ribotide amidotransferase                                                                       | KIAA0361  |          | 1.24     |          |          | 1.24       |      | 14       | 11         | 7.89E-119 |
| Q9HCE 1-1  | Moloney leukemia virus 10 protein                                                                                 | KIAA1631  | 1.33     | 1.51     | 0.89     | 1.12     | 1.24       | 0.32 | 9        | 11         | 4.14E-129 |
| Q9BXS 6-1  | Nucleolar and spindle-associated protein 1                                                                        | ANKT      | 1.10     | 1.12     | 1.53     | 0.65     | 1.25       | 0.24 | 6        | 17         | 2.31E-35  |
| B4DZH 6    | cDNA FLJ56474, highly similar to Histone deacetylase 6                                                            | HDAC6     |          |          | 1.25     | 0.80     | 1.25       |      | 2        | 2.5        | 2.23E-04  |
| P46939     | Dystrophin-related protein 1                                                                                      | DMDL      |          |          | 1.25     | 0.80     | 1.25       |      | 2        | 0.8        | 1.42E-07  |
| Q9H410 -1  | Kinetochores-associated protein DSN1 homolog                                                                      | C20orf172 |          |          | 1.25     | 0.80     | 1.25       |      | 2        | 5.6        | 2.26E-04  |
| A6QL6 4-2  | UPF0634 protein KIAA1641                                                                                          | KIAA1641  |          |          | 1.25     | 0.80     | 1.25       |      | 2        | 1.4        | 2.26E-02  |
| P13797     | Plastin-3                                                                                                         | PLS3      |          |          | 1.25     | 0.80     | 1.25       |      | 8        | 12         | 4.29E-139 |
| Q5T5I6     | Golgi phosphoprotein                                                                                              | GOLPH     |          | 1.25     |          |          | 1.25       |      | 2        | 9.1        | 1.37E-31  |

| UniProt ID | Protein_Name                                               | Gene Name         | F1 (L/H) | F2 (L/H) | R1 (H/L) | R1 (L/H) | Mean (T/U) | S.D. | Pep. No. | %Seq. Cov. | PEP       |
|------------|------------------------------------------------------------|-------------------|----------|----------|----------|----------|------------|------|----------|------------|-----------|
|            | 3-like                                                     | 3L                |          |          |          |          |            |      |          |            |           |
| B4DV13     | cDNA FLJ51327, highly similar to Protein CGI-117           | hCG_1980223       |          | 1.25     |          |          | 1.25       |      | 2        | 7.8        | 8.14E-06  |
| P51452     | Dual specificity protein phosphatase 3                     | DUSP3             | 1.25     |          |          |          | 1.25       |      | 2        | 15         | 6.44E-56  |
| C9J5N9     | Putative uncharacterized protein APOOL                     | APOOL             | 1.25     |          |          |          | 1.25       |      | 2        | 9.7        | 7.81E-09  |
| Q96E11-1   | Ribosome-recycling factor, mitochondrial                   | MRRF              | 1.40     | 1.48     | 0.88     | 1.14     | 1.25       | 0.33 | 5        | 30         | 5.03E-52  |
| Q9UFN0     | Protein NipSnap homolog 3A                                 | HSPC299           | 1.02     |          | 1.49     | 0.67     | 1.26       | 0.33 | 4        | 24         | 1.19E-36  |
| Q9P2W1-1   | Homologous-pairing protein 2 homolog                       | HOP2              | 1.25     | 1.44     | 1.08     | 0.93     | 1.26       | 0.18 | 3        | 20         | 2.43E-37  |
| Q96GM8     | Target of EGR1 protein 1                                   | TOE1              | 1.17     | 1.61     | 0.99     | 1.01     | 1.26       | 0.32 | 3        | 11         | 1.90E-26  |
| O60831     | PRA1 family protein 2                                      | JM4               | 1.06     | 1.17     | 1.55     | 0.65     | 1.26       | 0.26 | 3        | 17         | 1.30E-52  |
| Q5T4L4     | Putative uncharacterized protein RPS27                     | RP11-422P24.3-002 | 1.73     | 1.28     | 0.77     | 1.30     | 1.26       | 0.48 | 4        | 39         | 2.58E-21  |
| P46926     | Glucosamine-6-phosphate deaminase 1                        | GNPD A1           | 1.39     | 1.76     | 0.63     | 1.59     | 1.26       | 0.58 | 3        | 13         | 2.29E-31  |
| Q9P035     | Butyrate-induced protein 1                                 | BIND1             |          |          | 1.26     | 0.79     | 1.26       |      | 4        | 13         | 9.52E-08  |
| Q14242     | P-selectin glycoprotein ligand 1                           | SELPLG            |          |          | 1.26     | 0.79     | 1.26       |      | 5        | 9.3        | 1.43E-08  |
| O75251     | Complex I-20kD                                             | NDUFS7            | 1.26     |          |          |          | 1.26       |      | 2        | 14         | 5.26E-13  |
| Q86XL3-1   | Ankyrin repeat and LEM domain-containing protein 2         | ANKLE2            | 1.26     |          |          |          | 1.26       |      | 2        | 5.5        | 1.63E-12  |
| B4DLW0     | cDNA FLJ56622, highly similar to Beta-arrestin-2           | ARB2              | 1.26     |          |          |          | 1.26       |      | 2        | 7.2        | 9.67E-07  |
| Q92979     | Nucleolar protein EMG1 homolog                             | C2F               | 1.38     |          | 1.15     | 0.87     | 1.27       | 0.16 | 3        | 20         | 9.34E-13  |
| O60701     | UDP-glucose 6-dehydrogenase                                | UGDH              |          | 1.05     | 1.48     | 0.68     | 1.27       | 0.30 | 2        | 4.7        | 8.96E-07  |
| B0QZ18     | Copine I                                                   | CPNE1             | 1.57     |          | 0.96     | 1.04     | 1.27       | 0.43 | 4        | 12         | 6.23E-58  |
| P41250     | Diadenosine tetraphosphate synthetase                      | GARS              | 1.26     | 1.25     | 1.29     | 0.78     | 1.27       | 0.02 | 34       | 52         | 0.00E+00  |
| B4DMU0     | Pyrroline-5-carboxylate reductase                          | PYCR1             | 1.23     | 1.41     | 1.16     | 0.86     | 1.27       | 0.13 | 7        | 29         | 3.96E-153 |
| Q14137     | Block of proliferation 1 protein                           | BOP1              | 1.59     | 1.62     | 0.59     | 1.69     | 1.27       | 0.59 | 13       | 30         | 2.06E-109 |
| Q68E01-1   | Integrator complex subunit 3                               | C1orf193          | 1.99     | 0.77     | 1.04     | 0.96     | 1.27       | 0.64 | 4        | 8.2        | 5.30E-15  |
| Q9GZZ9-1   | Ubiquitin-activating enzyme E1 domain-containing protein 1 | UBA5              | 1.02     | 1.87     | 0.91     | 1.10     | 1.27       | 0.53 | 3        | 11         | 2.84E-17  |

| UniProt ID | Protein_Name                                                                                | Gene Name | F1 (L/H) | F2 (L/H) | R1 (H/L) | R1 (L/H) | Mean (T/U) | S.D. | Pep. No. | %Seq. Cov. | PEP       |
|------------|---------------------------------------------------------------------------------------------|-----------|----------|----------|----------|----------|------------|------|----------|------------|-----------|
| P61978-1   | Heterogeneous nuclear ribonucleoprotein K                                                   | HNRNP K   | 1.12     | 1.01     | 1.68     | 0.60     | 1.27       | 0.36 | 44       | 71         | 0.00E+00  |
| Q9BX68     | Histidine triad nucleotide-binding protein 2, mitochondrial                                 | HINT2     | 1.54     | 1.31     | 0.96     | 1.04     | 1.27       | 0.29 | 5        | 46         | 1.04E-90  |
| A6NMJ5     | Putative uncharacterized protein YTHDF1                                                     | YTHDF1    |          | 1.51     | 1.03     | 0.97     | 1.27       | 0.34 | 5        | 9.6        | 4.55E-46  |
| C9J303     | Putative uncharacterized protein SNRPG                                                      | SNRPG     | 0.99     |          | 1.55     | 0.65     | 1.27       | 0.40 | 2        | 15         | 1.16E-83  |
| B4E3Q7     | 3-oxoacyl-ACP synthase, mitochondrial, isoform CRA_a                                        | hCG_28352 |          |          | 1.27     | 0.79     | 1.27       |      | 2        | 25         | 2.15E-03  |
| B4DMB7     | cDNA FLJ55986                                                                               | C14orf133 |          |          | 1.27     | 0.79     | 1.27       |      | 3        | 8.7        | 1.43E-03  |
| Q9H488-1   | GDP-fucose protein O-fucosyltransferase 1                                                   | FUT12     |          |          | 1.27     | 0.79     | 1.27       |      | 3        | 10         | 3.43E-13  |
| Q9HD47-1   | Ran guanine nucleotide release factor                                                       | HSPC165   | 1.27     |          |          |          | 1.27       |      | 3        | 26         | 3.44E-20  |
| O95749     | Dimethylallyltranstransferase                                                               | GGPS1     |          | 1.27     |          |          | 1.27       |      | 3        | 8.7        | 4.72E-05  |
| Q13015     | Protein AF1q                                                                                | AF1Q      | 1.27     |          |          |          | 1.27       |      | 4        | 73         | 1.11E-53  |
| B2RAN1     | cDNA, FLJ95012, highly similar to Homo sapiens UDP-glucose pyrophosphorylase 2 (UGP2), mRNA | UGP2      | 1.45     | 1.03     | 1.34     | 0.75     | 1.27       | 0.22 | 5        | 13         | 2.00E-24  |
| Q9BQ69     | MACRO domain-containing protein 1                                                           | LRP16     | 0.82     |          | 1.73     | 0.58     | 1.28       | 0.64 | 3        | 14         | 2.24E-19  |
| P11908-2   | Phosphoribosyl pyrophosphate synthase II                                                    | PRPS2     | 1.40     |          | 1.16     | 0.86     | 1.28       | 0.17 | 10       | 36         | 4.08E-146 |
| Q6NZY4-1   | Zinc finger CCHC domain-containing protein 8                                                | ZCCHC8    | 1.18     | 1.59     | 1.07     | 0.93     | 1.28       | 0.27 | 8        | 15         | 3.92E-70  |
| O75306     | Complex I-49kD                                                                              | NDUFS2    |          | 0.97     | 1.59     | 0.63     | 1.28       | 0.44 | 4        | 7.8        | 6.21E-60  |
| P49902     | Cytosolic 5-nucleotidase II                                                                 | NT5B      | 1.63     |          | 0.93     | 1.08     | 1.28       | 0.49 | 3        | 9.3        | 6.40E-51  |
| Q6P9B9     | Integrator complex subunit 5                                                                | INTS5     |          | 1.28     |          |          | 1.28       |      | 3        | 3          | 1.00E-11  |
| Q15008     | 26S proteasome non-ATPase regulatory subunit 6                                              | KIAA0107  |          | 1.28     |          |          | 1.28       |      | 11       | 29         | 2.13E-46  |
| A6NKT7     | RanBP2-like and GRIP domain-containing protein 3                                            | RGP3      |          | 1.28     |          |          | 1.28       |      | 12       | 8.4        | 3.09E-112 |
| Q8WZ82     | Ovarian cancer-associated gene 2                                                            | OVCA2     | 1.53     | 1.60     | 0.72     | 1.39     | 1.28       | 0.49 | 5        | 34         | 2.16E-50  |



| UniProt ID | Protein_Name                                                                                      | Gene Name         | F1 (L/H) | F2 (L/H) | R1 (H/L) | R1 (L/H) | Mean (T/U) | S.D. | Pep. No. | %Seq. Cov. | PEP       |
|------------|---------------------------------------------------------------------------------------------------|-------------------|----------|----------|----------|----------|------------|------|----------|------------|-----------|
|            | protein                                                                                           |                   |          |          |          |          |            |      |          |            |           |
| Q9NVX2     | Notchless protein homolog 1                                                                       | HUSSY-07          | 1.57     | 1.21     | 1.07     | 0.93     | 1.28       | 0.26 | 2        | 4.7        | 1.19E-05  |
| Q99873-1   | Interferon receptor 1-bound protein 4                                                             | HMT2              | 1.39     | 1.82     | 0.64     | 1.56     | 1.28       | 0.60 | 5        | 18         | 4.08E-49  |
| Q86YV9     | Hermansky-Pudlak syndrome 6 protein                                                               | HPS6              | 1.36     |          | 1.21     | 0.83     | 1.29       | 0.11 | 2        | 5.7        | 1.76E-19  |
| O75787     | ATPase H(+)-transporting lysosomal accessory protein 2                                            | ATP6A P2          | 1.34     | 1.61     | 0.91     | 1.10     | 1.29       | 0.35 | 3        | 11         | 5.35E-67  |
| Q00325-2   | Phosphate carrier protein, mitochondrial                                                          | OK/SW-cl.48       | 1.31     | 1.36     | 1.20     | 0.83     | 1.29       | 0.08 | 7        | 19         | 3.95E-42  |
| Q9NRF9     | Arsenic-transactivated protein                                                                    | CHRA C17          | 1.17     |          | 1.41     | 0.71     | 1.29       | 0.17 | 6        | 34         | 5.15E-17  |
| Q969H8     | Interleukin-25                                                                                    | C19orf10          | 1.15     |          | 1.43     | 0.70     | 1.29       | 0.20 | 3        | 21         | 3.47E-44  |
| Q9BT30     | Alkylated DNA repair protein alkB homolog 7                                                       | ABH7              |          |          | 1.29     | 0.78     | 1.29       |      | 2        | 15         | 1.50E-05  |
| P05386     | 60S acidic ribosomal protein P1                                                                   | RPLP1             | 1.29     |          |          |          | 1.29       |      | 2        | 52         | 5.95E-60  |
| P51812     | 90 kDa ribosomal protein S6 kinase 3                                                              | ISPK1             |          | 1.29     |          |          | 1.29       |      | 2        | 3.4        | 9.00E-03  |
| B4DGY2     | cDNA FLJ59683, highly similar to Homo sapiens malignant T cell amplified sequence 1 (MCTS1), mRNA | MCTS1             | 1.24     | 1.35     |          |          | 1.30       | 0.08 | 5        | 41         | 8.21E-87  |
| Q15813     | Tubulin-folding cofactor E                                                                        | TBCE              |          | 1.69     | 0.9      | 1.11     | 1.30       | 0.56 | 25       | 54         | 7.86E-264 |
| P05161     | Interferon-induced 15 kDa protein                                                                 | G1P2              | 1.99     | 0.95     | 0.95     | 1.05     | 1.30       | 0.60 | 4        | 37         | 3.43E-32  |
| Q969S3     | Zinc finger protein 622                                                                           | ZNF622            | 1.33     | 1.61     | 0.96     | 1.04     | 1.30       | 0.33 | 4        | 11         | 2.68E-24  |
| Q96C36     | Pyrroline-5-carboxylate reductase 2                                                               | PYCR2             | 1.52     | 1.52     | 0.86     | 1.16     | 1.30       | 0.38 | 7        | 28         | 6.37E-77  |
| Q9H5X1     | Protein FAM96A                                                                                    | FAM96A            |          |          | 1.30     | 0.77     | 1.30       |      | 2        | 13         | 5.47E-03  |
| Q8NHP8     | 76 kDa protein                                                                                    | PLBD2             |          |          | 1.30     | 0.77     | 1.30       |      | 5        | 11         | 5.22E-41  |
| B0LM41     | Transcriptional coactivator CoAZ                                                                  | RBM14/RBM4 fusion |          |          | 1.30     | 0.77     | 1.30       |      | 11       | 48         | 1.69E-243 |
| Q9UKJ3-1   | G patch domain-containing protein 8                                                               | GPATC8            |          | 1.30     |          |          | 1.30       |      | 2        | 1.7        | 4.91E-09  |
| O14653-2   | 27 kDa Golgi SNARE protein                                                                        | GOSR2             | 1.30     |          |          |          | 1.30       |      | 3        | 17         | 7.36E-14  |
| P58107     | 450 kDa epidermal antigen                                                                         | EPIPL             | 1.30     |          |          |          | 1.30       |      | 4        | 3.6        | 2.81E-54  |
| P08195-4   | 4F2 cell-surface antigen heavy chain                                                              | MDU1              | 1.28     | 1.32     | 1.31     | 0.76     | 1.30       | 0.02 | 16       | 29         | 4.07E-214 |

| UniProt ID | Protein_Name                                                                                   | Gene Name | F1 (L/H) | F2 (L/H) | R1 (H/L) | R1 (L/H) | Mean (T/U) | S.D. | Pep. No. | %Seq. Cov. | PEP       |
|------------|------------------------------------------------------------------------------------------------|-----------|----------|----------|----------|----------|------------|------|----------|------------|-----------|
| Q96AQ6-1   | Hematopoietic PBX-interacting protein                                                          | HPIP      | 1.32     | 1.06     | 1.53     | 0.65     | 1.30       | 0.24 | 3        | 5.7        | 8.27E-12  |
| P55010     | Eukaryotic translation initiation factor 5                                                     | EIF5      | 1.53     | 1.58     | 0.80     | 1.25     | 1.30       | 0.44 | 12       | 29         | 2.96E-65  |
| Q8WZA9     | Immunity-related GTPase family Q protein                                                       | FKSG27    | 1.91     | 1.03     | 0.97     | 1.03     | 1.30       | 0.53 | 5        | 13         | 2.12E-14  |
| Q9BZK7     | F-box-like/WD repeat-containing protein TBL1XR1                                                | IRA1      | 2.01     | 0.83     | 1.07     | 0.93     | 1.30       | 0.62 | 4        | 10         | 2.54E-57  |
| Q99766     | ATP synthase subunit s, mitochondrial                                                          | ATP5S     | 1.18     |          | 1.43     | 0.70     | 1.31       | 0.18 | 2        | 9.3        | 2.00E-04  |
| Q8WUF8-1   | Protein FAM172A                                                                                | C5orf21   | 1.16     |          | 1.45     | 0.69     | 1.31       | 0.21 | 2        | 8.2        | 2.54E-06  |
| Q71DI3     | Histone H3.2                                                                                   | H3F2      | 1.01     |          | 1.60     | 0.63     | 1.31       | 0.42 | 8        | 53         | 3.03E-113 |
| B4DNA3     | Adenylyl cyclase-associated protein                                                            | CAP1      | 0.84     | 1.81     | 1.27     | 0.79     | 1.31       | 0.49 | 26       | 73         | 4.75E-269 |
| P46013-1   | Antigen KI-67                                                                                  | MKI67     | 1.38     | 1.18     | 1.37     | 0.73     | 1.31       | 0.11 | 10       | 5.1        | 3.16E-38  |
| P07738     | 2,3-bisphosphoglycerate mutase, erythrocyte                                                    | BPGM      |          |          | 1.31     | 0.76     | 1.31       |      | 2        | 12         | 1.34E-13  |
| B7ZM97     | SFRS8 protein                                                                                  | SFRS8     |          |          | 1.31     | 0.76     | 1.31       |      | 3        | 3.6        | 7.89E-04  |
| Q9BTU6     | Phosphatidylinositol 4-kinase type 2-alpha                                                     | PI4K2A    | 1.31     |          |          |          | 1.31       |      | 2        | 9.6        | 1.10E-06  |
| Q9UBB5-1   | Demethylase                                                                                    | MBD2      | 1.31     |          |          |          | 1.31       |      | 2        | 7.1        | 4.55E-04  |
| Q96A72     | Protein mago nashi homolog 2                                                                   | MAGO H2   | 1.37     | 1.26     |          |          | 1.32       | 0.08 | 3        | 33         | 2.43E-07  |
| Q9Y248     | DNA replication complex GINS protein PSF2                                                      | CGI-122   | 1.17     | 1.46     |          |          | 1.32       | 0.21 | 3        | 27         | 1.10E-18  |
| B4DHX5     | cDNA FLJ53329, highly similar to NADPH:adrenodoxin oxidoreductase, mitochondrial (EC 1.18.1.2) | ADXR      |          | 1.10     | 1.53     | 0.65     | 1.32       | 0.30 | 3        | 5.6        | 1.38E-03  |
| Q9UL42     | 40 kDa neuronal protein                                                                        | KIAA0883  | 1.36     | 1.89     | 0.70     | 1.43     | 1.32       | 0.60 | 4        | 19         | 1.68E-09  |
| Q99442     | Translocation protein 1                                                                        | SEC62     |          | 1.05     | 1.59     | 0.63     | 1.32       | 0.38 | 2        | 3          | 9.20E-04  |
| Q96NY9     | Crossover junction endonuclease MUS81                                                          | MUS81     | 1.32     |          |          |          | 1.32       |      | 2        | 7.1        | 1.97E-09  |
| Q15070-2   | Mitochondrial inner membrane protein OXA1L                                                     | OXA1L     | 1.32     |          |          |          | 1.32       |      | 2        | 8.8        | 8.22E-03  |
| P32519     | E74-like factor 1                                                                              | ELF1      | 1.39     | 1.49     | 1.09     | 0.92     | 1.32       | 0.21 | 4        | 13         | 2.67E-23  |
| Q9BTY7     | Brain protein 16                                                                               | BRP16     | 1.41     | 1.69     | 0.87     | 1.15     | 1.32       | 0.42 | 5        | 24         | 2.54E-36  |
| Q96DA      | DnaJ homolog subfamily C member                                                                | DNAJC19   | 1.39     | 1.26     |          |          | 1.33       | 0.09 | 3        | 27         | 1.38E-15  |

| UniProt ID | Protein_Name                                                                       | Gene Name | F1 (L/H) | F2 (L/H) | R1 (H/L) | R1 (L/H) | Mean (T/U) | S.D. | Pep. No. | %Seq. Cov. | PEP       |
|------------|------------------------------------------------------------------------------------|-----------|----------|----------|----------|----------|------------|------|----------|------------|-----------|
| 6          | 19                                                                                 |           |          |          |          |          |            |      |          |            |           |
| P41223     | Protein BUD31 homolog                                                              | BUD31     | 1.43     | 1.24     | 1.31     | 0.76     | 1.33       | 0.10 | 5        | 42         | 6.75E-48  |
| O43175     | D-3-phosphoglycerate dehydrogenase                                                 | PGDH3     | 1.19     | 1.18     | 1.62     | 0.62     | 1.33       | 0.25 | 22       | 55         | 0.00E+00  |
| Q86TI0     | TBC1 domain family member 1                                                        | KIAA1108  |          |          | 1.33     | 0.75     | 1.33       |      | 2        | 1.8        | 2.39E-14  |
| O43324     | Aminoacyl tRNA synthetase complex-interacting multifunctional protein 3            | AIMP3     | 1.33     |          |          |          | 1.33       |      | 2        | 9.8        | 2.04E-10  |
| Q6NUM9-1   | All-trans-13,14-dihydroretinol saturase                                            | RETSAT    | 1.33     |          |          |          | 1.33       |      | 2        | 4.9        | 1.85E-09  |
| Q15836     | Cellubrevin                                                                        | SYB3      |          | 1.33     |          |          | 1.33       |      | 3        | 40         | 1.36E-161 |
| Q9BRP1     | Programmed cell death protein 2-like                                               | PDCD2L    | 1.38     | 1.30     |          |          | 1.34       | 0.06 | 3        | 9.5        | 3.73E-13  |
| P09471-1   | Guanine nucleotide-binding protein G(o) subunit alpha                              | GNAO1     | 0.93     | 1.33     | 1.76     | 0.57     | 1.34       | 0.42 | 5        | 17         | 7.05E-39  |
| Q9NYV4-1   | Cdc2-related kinase, arginine/serine-rich                                          | CDK12     | 1.87     | 1.28     | 0.87     | 1.15     | 1.34       | 0.50 | 5        | 5.2        | 1.14E-117 |
| Q9UDX4     | SEC14-like protein 3                                                               | SEC14L3   |          |          | 1.34     | 0.75     | 1.34       |      | 2        | 8.4        | 1.57E-02  |
| Q8IY37     | DEAH box protein 37                                                                | DDX37     |          |          | 1.34     | 0.75     | 1.34       |      | 2        | 2.5        | 4.65E-11  |
| Q8CCF4     | Putative uncharacterized protein DOCK11                                            | DOCK11    |          |          | 1.34     | 0.75     | 1.34       |      | 3        | 1.4        | 2.15E-03  |
| P30462     | HLA class I histocompatibility antigen, B-14 alpha chain                           | HLAB14    |          |          | 1.34     | 0.75     | 1.34       |      | 8        | 30         | 2.20E-99  |
| Q9H7E9-2   | UPF0488 protein C8orf33                                                            | C8orf33   | 1.34     | 2.02     | 0.68     | 1.47     | 1.35       | 0.67 | 2        | 12         | 1.57E-33  |
| B3KM97     | cDNA FLJ10554 fis, clone NT2RP2002385, highly similar to Synaptic glycoprotein SC2 | GPSN2     | 1.59     |          | 1.11     | 0.90     | 1.35       | 0.34 | 3        | 8.7        | 7.82E-05  |
| Q9Y4E8-1   | Deubiquitinating enzyme 15                                                         | KIAA0529  | 1.35     |          |          |          | 1.35       |      | 2        | 2          | 1.25E-13  |
| Q15041     | ADP-ribosylation factor-like protein 6-interacting protein 1                       | ARL6IP    | 1.35     |          |          |          | 1.35       |      | 2        | 8.9        | 7.78E-03  |
| C9J4G0     | HCG32827, isoform CRA_d                                                            | C17orf49  | 1.35     |          |          |          | 1.35       |      | 3        | 23         | 8.38E-24  |
| Q8WY22     | BRI3-binding protein                                                               | BRI3BP    | 1.27     | 1.72     | 1.07     | 0.93     | 1.35       | 0.33 | 2        | 14         | 1.44E-70  |
| Q8TCA0-1   | Leucine-rich repeat-containing protein 20                                          | LRRC20    | 1.32     | 1.39     |          |          | 1.36       | 0.05 | 3        | 20         | 1.78E-07  |
| Q9Y2R4     | ATP-dependent RNA helicase ROK1-like                                               | DDX52     | 1.75     |          | 0.96     | 1.04     | 1.36       | 0.56 | 2        | 6.7        | 1.67E-05  |

| UniProt ID | Protein_Name                                                                                                                                          | Gene Name | F1 (L/H) | F2 (L/H) | R1 (H/L) | R1 (L/H) | Mean (T/U) | S.D. | Pep. No. | %Seq. Cov. | PEP      |
|------------|-------------------------------------------------------------------------------------------------------------------------------------------------------|-----------|----------|----------|----------|----------|------------|------|----------|------------|----------|
| Q9BZQ8     | Cell growth-inhibiting gene 39 protein                                                                                                                | C1orf24   | 1.28     | 1.36     | 1.43     | 0.70     | 1.36       | 0.08 | 5        | 11         | 6.00E-84 |
| Q15311     | 76 kDa Ral-interacting protein                                                                                                                        | RALBP1    |          |          | 1.36     | 0.74     | 1.36       |      | 3        | 7.8        | 1.85E-09 |
| O15320-5   | cTAGE family member 5                                                                                                                                 | CTAGE5    |          |          | 1.36     | 0.74     | 1.36       |      | 3        | 5.9        | 1.14E-07 |
| P49137-1   | MAP kinase-activated protein kinase 2                                                                                                                 | MAPKAPK2  |          | 1.36     |          |          | 1.36       |      | 2        | 5          | 8.37E-04 |
| Q9Y3E7     | Charged multivesicular body protein 3                                                                                                                 | CGI-149   |          | 1.36     |          |          | 1.36       |      | 2        | 7.7        | 3.17E-03 |
| Q8IWD4-1   | Coiled-coil domain-containing protein 117                                                                                                             | CCDC117   | 1.36     |          |          |          | 1.36       |      | 2        | 13         | 1.84E-17 |
| B4E284     | cDNA FLJ51188, highly similar to N-acetylglucosamine-6-sulfatase (EC3.1.6.14)                                                                         | GNS       |          | 1.36     |          |          | 1.36       |      | 2        | 3.6        | 1.35E-06 |
| Q5JYR6     | cDNA FLJ38924 fis, clone NT2NE2011896, highly similar to Dolichyl-diphosphooligosaccharide--protein glycosyltransferase 63 kDa subunit (EC 2.4.1.119) | hCG_37142 |          | 1.36     |          |          | 1.36       |      | 4        | 8.5        | 1.66E-32 |
| O43592     | Exportin(tRNA)                                                                                                                                        | XPOT      | 1.72     | 1.54     | 0.83     | 1.20     | 1.36       | 0.47 | 8        | 14         | 3.02E-48 |
| Q6P1L5-1   | Amyotrophic lateral sclerosis 2 chromosomal region candidate gene 13 protein                                                                          | ALS2C R13 |          | 1.03     | 1.70     | 0.59     | 1.37       | 0.47 | 3        | 6.1        | 7.78E-43 |
| A7E2Y1-1   | Antigen MLAA-21                                                                                                                                       | KIAA1512  |          |          | 1.37     | 0.73     | 1.37       |      | 4        | 2          | 3.96E-06 |
| A6NFH1     | Putative uncharacterized protein GTPBP3                                                                                                               | GTPBP3    | 1.37     |          |          |          | 1.37       |      | 2        | 8.4        | 6.23E-25 |
| P47813     | Eukaryotic translation initiation factor 1A, X-chromosomal                                                                                            | EIF1A     | 1.37     |          |          |          | 1.37       |      | 6        | 35         | 2.61E-21 |
| Q68Y55     | Poly(RC) binding protein 2                                                                                                                            | PCBP2     | 1.37     |          |          |          | 1.37       |      | 17       | 74         | 0.00E+00 |
| O15143     | Actin-related protein 2/3 complex subunit 1B                                                                                                          | ARC41     | 1.23     | 1.64     | 1.25     | 0.80     | 1.37       | 0.23 | 7        | 20         | 1.27E-95 |
| Q9Y5X1     | SH3 and PX domain-containing protein 1                                                                                                                | SH3PX1    | 1.37     | 1.39     |          |          | 1.38       | 0.01 | 3        | 6.4        | 1.40E-14 |
| Q6NS38     | Alkylated DNA repair protein alkB homolog 2                                                                                                           | ABH2      | 1.40     | 1.36     |          |          | 1.38       | 0.03 | 3        | 14         | 8.69E-67 |
| O75044     | Formin-binding protein 2                                                                                                                              | ARHGAP34  |          | 1.03     | 1.73     | 0.58     | 1.38       | 0.49 | 4        | 5          | 9.40E-08 |
| Q6ZQQ      | Testis development                                                                                                                                    | WDR87     |          |          | 1.38     | 0.72     | 1.38       |      | 2        | 0.9        | 1.77E-02 |

| UniProt ID | Protein_Name                                                                       | Gene Name | F1 (L/H) | F2 (L/H) | R1 (H/L) | R1 (L/H) | Mean (T/U) | S.D. | Pep. No. | %Seq. Cov. | PEP       |
|------------|------------------------------------------------------------------------------------|-----------|----------|----------|----------|----------|------------|------|----------|------------|-----------|
| 6-2        | protein NYD-SP11                                                                   |           |          |          |          |          |            |      |          |            |           |
| Q08209-1   | Calmodulin-dependent calcineurin A subunit alpha isoform                           | CALNA     |          |          | 1.38     | 0.72     | 1.38       |      | 3        | 6.1        | 1.16E-06  |
| B7Z6Q5     | Beta-galactosidase                                                                 | ELNR1     |          |          | 1.38     | 0.72     | 1.38       |      | 3        | 7.6        | 1.61E-06  |
| Q93074-3   | Activator-recruited cofactor 240 kDa component                                     | ARC240    |          | 1.38     |          |          | 1.38       |      | 2        | 0.7        | 2.99E-02  |
| P48723     | Heat shock 70 kDa protein 13                                                       | HSPA13    |          | 1.38     |          |          | 1.38       |      | 2        | 4          | 7.35E-03  |
| P51531-1   | ATP-dependent helicase SMARCA2                                                     | BAF190B   |          | 1.38     |          |          | 1.38       |      | 6        | 3.7        | 1.12E-12  |
| Q01650     | 4F2 light chain                                                                    | CD98LC    | 1.41     | 1.50     | 1.25     | 0.80     | 1.39       | 0.13 | 5        | 7.9        | 4.41E-99  |
| P23381-1   | Interferon-induced protein 53                                                      | IFI53     | 1.71     | 1.62     | 0.84     | 1.19     | 1.39       | 0.48 | 10       | 28         | 8.64E-135 |
| Q9H3Z4-1   | Cysteine string protein                                                            | CSP       |          |          | 1.39     | 0.72     | 1.39       |      | 2        | 25         | 1.77E-06  |
| P29350-3   | Hematopoietic cell protein-tyrosine phosphatase                                    | HCP       |          |          | 1.39     | 0.72     | 1.39       |      | 28       | 56         | 0.00E+00  |
| C9JXA6     | Adapter-related protein complex 1 sigma-1A subunit                                 | AP19      | 1.39     |          |          |          | 1.39       |      | 3        | 17         | 1.56E-42  |
| Q96FX7-2   | tRNA (adenine-N(1)-)-methyltransferase catalytic subunit TRMT61A                   | C14orf172 | 1.55     | 1.89     | 0.74     | 1.35     | 1.39       | 0.59 | 3        | 15         | 1.86E-56  |
| P13995     | Bifunctional methylenetetrahydrofolate dehydrogenase/cyclohydrolase, mitochondrial | MTHFD2    | 1.48     | 1.44     | 1.27     | 0.79     | 1.40       | 0.11 | 12       | 49         | 8.45E-66  |
| O00115     | Acid DNase                                                                         | DNASE2    |          |          | 1.40     | 0.71     | 1.40       |      | 2        | 5.8        | 3.05E-56  |
| Q9Y3Q3     | Membrane protein p24B                                                              | C15orf22  |          | 1.40     |          |          | 1.40       |      | 2        | 8.8        | 8.90E-06  |
| Q9BRU9-1   | rRNA-processing protein UTP23 homolog                                              | C8orf53   |          | 1.40     |          |          | 1.40       |      | 3        | 9.2        | 8.58E-07  |
| Q9Y696     | Chloride intracellular channel protein 4                                           | CLIC4     | 1.14     | 1.13     | 1.95     | 0.51     | 1.41       | 0.47 | 10       | 48         | 6.10E-89  |
| Q9Y613-2   | EH domain-binding mitotic phosphoprotein                                           | EPN1      |          |          | 1.41     | 0.71     | 1.41       |      | 2        | 5          | 9.27E-27  |
| Q9HCL2     | Glycerol-3-phosphate acyltransferase 1, mitochondrial                              | GPAM      |          |          | 1.41     | 0.71     | 1.41       |      | 2        | 5.1        | 1.72E-01  |
| Q92620     | ATP-dependent RNA helicase DHX38                                                   | DDX38     | 1.41     |          |          |          | 1.41       |      | 2        | 2.3        | 4.35E-03  |
| O94919     | Endonuclease domain-containing 1 protein                                           | ENDO1     | 1.75     | 1.85     | 0.63     | 1.59     | 1.41       | 0.68 | 4        | 16         | 2.50E-17  |
| P56381     | ATP synthase subunit                                                               | ATP5E     |          |          | 1.43     | 0.70     | 1.43       |      | 3        | 39         | 3.98E-08  |

| UniProt ID | Protein_Name                                                       | Gene Name       | F1 (L/H) | F2 (L/H) | R1 (H/L) | R1 (L/H) | Mean (T/U) | S.D. | Pep. No. | %Seq. Cov. | PEP       |
|------------|--------------------------------------------------------------------|-----------------|----------|----------|----------|----------|------------|------|----------|------------|-----------|
|            | epsilon, mitochondrial                                             |                 |          |          |          |          |            |      |          |            |           |
| A6NN38     | Coactivator-associated arginine methyltransferase 1, isoform CRA_b | CARM1           |          |          | 1.43     | 0.70     | 1.43       |      | 4        | 7.7        | 1.00E-09  |
| O94905-1   | Endoplasmic reticulum lipid raft-associated protein 2              | C8orf2          |          | 1.43     |          |          | 1.43       |      | 5        | 17         | 6.05E-43  |
| Q9NRK6     | ATP-binding cassette sub-family B member 10, mitochondrial         | ABCB10          |          |          | 1.44     | 0.69     | 1.44       |      | 5        | 9.6        | 2.18E-56  |
| Q9BVT8     | Hepatocyte odd protein shuttling protein                           | C7orf21         | 1.44     |          |          |          | 1.44       |      | 2        | 13         | 1.28E-04  |
| Q6NXS1     | Protein phosphatase 1, regulatory subunit 2 pseudogene 3           | PPP1R2P3        |          | 1.44     |          |          | 1.44       |      | 2        | 11         | 3.93E-10  |
| Q14376     | Galactowaldenase                                                   | GALE            | 1.44     |          |          |          | 1.44       |      | 2        | 14         | 2.91E-70  |
| Q02127     | Dihydroorotate dehydrogenase, mitochondrial                        | DHODH           |          | 1.44     |          |          | 1.44       |      | 3        | 10         | 9.63E-42  |
| Q08380     | Basement membrane autoantigen p105                                 | LGALS3BP        |          |          | 1.45     | 0.69     | 1.45       |      | 2        | 6.8        | 1.61E-35  |
| Q68D73     | Putative uncharacterized protein DKFZp686H15164                    | DKFZp686H15164  |          |          | 1.45     | 0.69     | 1.45       |      | 2        | 1.1        | 1.98E-02  |
| Q00266     | Methionine adenosyltransferase 1                                   | AMS1            |          |          | 1.45     | 0.69     | 1.45       |      | 6        | 16         | 8.93E-63  |
| B1AVU8     | Prosaposin                                                         | PSAP            | 1.45     |          |          |          | 1.45       |      | 5        | 7.7        | 6.50E-142 |
| Q9Y6H1     | Aging-associated gene 10 protein                                   | AAG10           | 2.20     | 1.73     | 0.43     | 2.33     | 1.45       | 0.92 | 4        | 34         | 1.09E-102 |
| Q969X6-1   | Cirhin                                                             | CIRH1A          | 1.46     |          | 1.45     | 0.69     | 1.46       | 0.01 | 4        | 7.9        | 3.73E-48  |
| Q92560     | BRCA1-associated protein 1                                         | BAP1            | 1.75     |          | 1.17     | 0.85     | 1.46       | 0.41 | 2        | 5.6        | 2.37E-22  |
| P82912-1   | 28S ribosomal protein S11, mitochondrial                           | HCC2            |          |          | 1.46     | 0.68     | 1.46       |      | 3        | 30         | 2.47E-12  |
| O94763-1   | Protein NNX3                                                       | C19orf2         |          |          | 1.46     | 0.68     | 1.46       |      | 3        | 13         | 2.92E-08  |
| Q6DN03     | Histone H2B.t                                                      | HIST2H2BC       |          |          | 1.46     | 0.68     | 1.46       |      | 7        | 30         | 2.26E-15  |
| B1AZV3     | Transporter 1 ATP-binding cassette sub-family B (MDR/TAP)          | DASS67H14.3-001 | 1.46     |          |          |          | 1.46       |      | 2        | 3.1        | 3.45E-09  |
| Q8WV22     | Non-structural maintenance of chromosomes element 1 homolog        | HSPC333         | 1.78     | 1.15     |          |          | 1.47       | 0.45 | 2        | 12         | 1.15E-16  |
| Q13428-4   | Treacher Collins syndrome protein                                  | TCOF1           | 1.5      | 1.57     | 1.33     | 0.75     | 1.47       | 0.12 | 18       | 15         | 3.49E-201 |
| P41091     | Eukaryotic translation                                             | EIF2G           | 1.89     | 1.84     | 0.67     | 1.49     | 1.47       | 0.69 | 12       | 34         | 1.36E-82  |

| UniProt ID | Protein_Name                                                 | Gene Name | F1 (L/H) | F2 (L/H) | R1 (H/L) | R1 (L/H) | Mean (T/U) | S.D. | Pep. No. | %Seq. Cov. | PEP       |
|------------|--------------------------------------------------------------|-----------|----------|----------|----------|----------|------------|------|----------|------------|-----------|
|            | initiation factor 2 subunit 3                                |           |          |          |          |          |            |      |          |            |           |
| O00754     | Lysosomal acid alpha-mannosidase                             | LAMAN     |          |          | 1.48     | 0.68     | 1.48       |      | 4        | 6.2        | 4.57E-94  |
| P62330     | ADP-ribosylation factor 6                                    | ARF6      | 1.48     |          |          |          | 1.48       |      | 2        | 26         | 1.21E-08  |
| Q9BPX5     | Actin-related protein 2/3 complex subunit 5-like protein     | ARPC5L    | 0.83     | 2.29     | 1.32     | 0.76     | 1.48       | 0.74 | 2        | 33         | 1.44E-19  |
| Q9NZ23     | Drug-sensitive protein 1                                     | YA61      | 1.92     | 1.36     | 1.17     | 0.85     | 1.48       | 0.39 | 8        | 80         | 3.71E-54  |
| Q9NWU1     | 3-oxoacyl-[acyl-carrier-protein] synthase, mitochondrial     | OXSM      |          |          | 1.49     | 0.67     | 1.49       |      | 2        | 10         | 1.73E-05  |
| A8MU24     | Prolylcarboxypeptidase (Angiotensinase C), isoform CRA_b     | hCG_27286 |          |          | 1.49     | 0.67     | 1.49       |      | 4        | 11         | 8.71E-15  |
| P18583-5   | Bax antagonist selected in saccharomyces 1                   | C21orf50  | 1.37     | 1.47     | 1.65     | 0.61     | 1.50       | 0.14 | 14       | 11         | 8.92E-54  |
| Q12906-1   | Isoform 1 of Interleukin                                     | ILF3      | 1.51     |          |          |          | 1.51       |      | 28       | 42         | 6.28E-203 |
| O95837     | Guanine nucleotide-binding protein subunit alpha-14          | GNA14     |          |          | 1.52     | 0.66     | 1.52       |      | 3        | 11         | 1.88E-46  |
| Q9NRF8     | CTP synthase 2                                               | CTPS2     |          |          | 1.52     | 0.66     | 1.52       |      | 3        | 6.1        | 1.33E-07  |
| P53801     | Putative pituitary tumor-transforming gene 3 protein         | PTTG3     |          |          | 1.53     | 0.65     | 1.53       |      | 2        | 11         | 1.51E-03  |
| Q13510-2   | Acid ceramidase                                              | ASAH      |          | 1.80     | 1.28     | 0.78     | 1.54       | 0.37 | 2        | 4.6        | 1.89E-03  |
| O75153     | Protein KIAA0664                                             | KIAA0664  | 1.25     | 1.81     | 1.57     | 0.64     | 1.54       | 0.28 | 9        | 11         | 7.08E-61  |
| Q8TEM4     | ADP-ribosylation factor-like protein 6-interacting protein 4 | FLJ00169  |          |          | 1.55     | 0.65     | 1.55       |      | 2        | 6.4        | 1.33E-115 |
| P78330     | L-3-phosphoserine phosphatase                                | PSPH      | 1.59     | 1.70     | 1.38     | 0.72     | 1.56       | 0.16 | 5        | 26         | 2.32E-29  |
| Q9Y324     | rRNA-processing protein FCF1 homolog                         | C14orf111 | 1.59     |          | 1.58     | 0.63     | 1.59       | 0.01 | 2        | 10         | 6.80E-18  |
| Q9UNK0     | Syntaxin-8                                                   | STX8      | 1.01     |          | 2.18     | 0.46     | 1.60       | 0.83 | 4        | 27         | 3.78E-89  |
| Q96IH1     | FSCN1 protein                                                | FSCN1     |          |          | 1.62     | 0.62     | 1.62       |      | 2        | 5.2        | 2.01E-25  |
| Q09666     | Desmoyokin                                                   | AHNAK     |          |          | 1.62     | 0.62     | 1.62       |      | 3        | 1.6        | 8.38E-05  |
| Q5T440     | Putative transferase C1orf69, mitochondrial                  | C1orf69   | 1.86     | 1.39     |          |          | 1.63       | 0.33 | 3        | 12         | 2.87E-41  |
| B4DHQ3     | Phosphoserine aminotransferase                               | PSA       | 1.85     | 1.83     | 1.20     | 0.83     | 1.63       | 0.37 | 22       | 59         | 9.30E-260 |
| Q7Z2Y      | Interferon-induced very large GTPase 1                       | GVIN1     |          | 1.63     |          |          | 1.63       |      | 2        | 0.9        | 6.26E-04  |

| UniProt ID | Protein_Name                                                       | Gene Name        | F1 (L/H) | F2 (L/H) | R1 (H/L) | R1 (L/H) | Mean (T/U) | S.D. | Pep. No. | %Seq. Cov. | PEP       |
|------------|--------------------------------------------------------------------|------------------|----------|----------|----------|----------|------------|------|----------|------------|-----------|
| 8          |                                                                    |                  |          |          |          |          |            |      |          |            |           |
| B1ANH1     | Guanylate kinase 1                                                 | GUK1             | 1.72     | 1.65     | 1.53     | 0.65     | 1.63       | 0.10 | 6        | 33         | 1.08E-59  |
| Q5T5C7     | Seryl-tRNA synthetase                                              | RP11-352P4.2-004 | 1.65     | 1.74     | 1.53     | 0.65     | 1.64       | 0.11 | 18       | 41         | 1.13E-165 |
| Q15758     | Baboon M7 virus receptor                                           | ASCT2            | 1.75     | 1.67     | 1.52     | 0.66     | 1.65       | 0.12 | 4        | 10         | 2.18E-28  |
| Q8TCD5-1   | 5(3)-deoxyribonucleotidase, cytosolic type                         | DNT1             | 1.65     |          |          |          | 1.65       |      | 4        | 30         | 1.93E-48  |
| O60547     | GDP-D-mannose dehydratase                                          | GMDS             | 1.66     |          |          |          | 1.66       |      | 2        | 5.1        | 8.70E-05  |
| O00165-2   | HCLS1-associated protein X-1                                       | HAX1             | 1.69     | 1.57     | 1.73     | 0.58     | 1.66       | 0.08 | 7        | 37         | 1.69E-26  |
| Q9BV57-1   | 1,2-dihydroxy-3-keto-5-methylthiopentene dioxygenase               | ADI1             | 1.60     |          | 1.74     | 0.57     | 1.67       | 0.10 | 6        | 47         | 7.83E-27  |
| Q8WTS1     | 1-acylglycerol-3-phosphate O-acyltransferase ABHD5                 | ABHD5            | 1.70     |          |          |          | 1.70       |      | 2        | 10         | 2.14E-11  |
| Q9UM00-1   | Transmembrane and coiled-coil domain-containing protein 1          | PNAS-10          | 2.09     | 1.84     | 1.24     | 0.81     | 1.72       | 0.44 | 2        | 15         | 3.24E-08  |
| Q96N66-1   | 1-acylglycerophosphatidylinositol O-acyltransferase                | BB1              | 2.22     | 2.10     | 0.86     | 1.16     | 1.73       | 0.75 | 3        | 6.4        | 1.59E-15  |
| Q7LBR1     | Charged multivesicular body protein 1b                             | C18orf2          |          |          | 1.73     | 0.58     | 1.73       |      | 2        | 7.5        | 1.15E-02  |
| P98155-1   | Very low-density lipoprotein receptor                              | VLDLR            |          |          | 1.74     | 0.57     | 1.74       |      | 2        | 4.6        | 4.89E-07  |
| P02794     | Cell proliferation-inducing gene 15 protein                        | FTH              | 1.96     |          | 1.53     | 0.65     | 1.75       | 0.30 | 5        | 42         | 3.73E-28  |
| Q9UPT6     | C-Jun-amino-terminal kinase-interacting protein 3                  | JIP3             |          |          | 1.78     | 0.56     | 1.78       |      | 2        | 3.1        | 2.28E-02  |
| Q02083-1   | Acid ceramidase-like protein                                       | ASAHL            | 1.78     |          |          |          | 1.78       |      | 2        | 10         | 7.34E-07  |
| P25686-3   | DnaJ homolog subfamily B member 2                                  | DNAJB2           |          | 1.79     |          |          | 1.79       |      | 3        | 9.3        | 3.83E-03  |
| P82970     | High mobility group nucleosome-binding domain-containing protein 5 | HMGN5            |          | 1.80     |          |          | 1.80       |      | 2        | 8.5        | 1.03E-04  |
| Q9C005     | Dpy-30-like protein                                                | DPY30            | 1.82     |          |          |          | 1.82       |      | 2        | 36         | 5.49E-34  |
| O60610-1   | Diaphanous-related formin-1                                        | DIAP1            | 1.99     | 2.10     | 1.39     | 0.72     | 1.83       | 0.38 | 23       | 23         | 1.08E-170 |
| Q9BY50     | Microsomal signal peptidase 21 kDa                                 | SEC11C           | 1.90     |          |          |          | 1.90       |      | 2        | 16         | 1.02E-43  |



| UniProt ID | Protein_Name                                                                                          | Gene Name | F1 (L/H) | F2 (L/H) | R1 (H/L) | R1 (L/H) | Mean (T/U) | S.D. | Pep. No. | %Seq. Cov. | PEP      |
|------------|-------------------------------------------------------------------------------------------------------|-----------|----------|----------|----------|----------|------------|------|----------|------------|----------|
|            | subunit                                                                                               |           |          |          |          |          |            |      |          |            |          |
| P50416-1   | Carnitine O-palmitoyltransferase 1, liver isoform                                                     | CPT1      | 2.01     | 2.10     | 1.63     | 0.61     | 1.91       | 0.25 | 10       | 15         | 3.49E-91 |
| Q5JTJ3-2   | Uncharacterized protein C1orf31                                                                       | C1orf31   | 2.42     | 1.64     | 1.69     | 0.59     | 1.92       | 0.44 | 2        | 17         | 1.82E-34 |
| Q14657     | L antigen family member 3                                                                             | DXS9879E  | 2.06     | 2.08     | 1.61     | 0.62     | 1.92       | 0.27 | 3        | 38         | 2.96E-42 |
| B4DW73     | cDNA FLJ50710, highly similar to Phosphoenolpyruvate carboxykinase (GTP), mitochondrial (EC 4.1.1.32) | PCK2      | 1.60     | 1.66     | 2.57     | 0.39     | 1.94       | 0.54 | 6        | 11         | 3.49E-54 |
| Q53EL6     | Neoplastic transformation inhibitor protein                                                           | H731      |          | 1.99     |          |          | 1.99       |      | 3        | 7.9        | 1.86E-09 |
| Q92599-1   | Septin-8                                                                                              | SEPT      |          | 2.06     |          |          | 2.06       |      | 2        | 3.3        | 1.46E-03 |
| Q01726     | Melanocortin receptor 1                                                                               | MC1R      | 1.81     |          | 2.35     | 0.43     | 2.08       | 0.38 | 17       | 28         | 0.00E+00 |
| P53350     | Polo-like kinase 1                                                                                    | PLK       |          | 2.77     | 1.67     | 0.60     | 2.22       | 0.78 | 2        | 5          | 1.19E-10 |
| Q9UKN8     | General transcription factor 3C polypeptide 4                                                         | GTF3C4    | 2.26     |          |          |          | 2.26       |      | 2        | 4.4        | 3.96E-03 |
| P08243     | Asparagine synthetase [glutamine-hydrolyzing]                                                         | ASNS      | 2.55     | 2.39     | 1.88     | 0.53     | 2.27       | 0.35 | 3        | 5.3        | 6.44E-76 |
| P12236     | Adenine nucleotide translocator 3                                                                     | ANT3      | 3.71     | 1.31     | 1.85     | 0.54     | 2.29       | 1.26 | 9        | 28         | 1.20E-35 |
| Q9NVP2     | Anti-silencing function protein 1 homolog B                                                           | ASF1B     | 2.86     |          | 1.79     | 0.56     | 2.33       | 0.76 | 4        | 35         | 1.28E-21 |
| Q9HB40-1   | Retinoid-inducible serine carboxypeptidase                                                            | MSTP034   |          |          | 2.34     | 0.43     | 2.34       |      | 2        | 5.3        | 3.37E-11 |
| Q9NQH7-1   | Aminopeptidase P3                                                                                     | XPNPEP3   | 2.95     |          | 1.93     | 0.52     | 2.44       | 0.72 | 2        | 7.5        | 9.99E-18 |
| Q05707-1   | Collagen alpha-1(XIV) chain                                                                           | COL14A1   |          | 2.48     |          |          | 2.48       |      | 2        | 1.5        | 2.85E-52 |
| Q8NCD3-1   | 14-3-3-associated AKT substrate                                                                       | FAKTS     |          | 2.68     |          |          | 2.68       |      | 2        | 3.2        | 9.86E-07 |
| Q75MQ0     | Putative uncharacterized protein EZH2                                                                 | EZH2      | 3.87     |          | 1.85     | 0.54     | 2.86       | 1.43 | 3        | 5.2        | 3.45E-08 |
| Q3B7T1-1   | Erythroid differentiation-related factor 1                                                            | C10orf137 | 3.42     |          |          |          | 3.42       |      | 2        | 2          | 1.62E-15 |
| Q9BPZ3     | Polyadenylate-binding protein-interacting protein 2                                                   | HSPC218   | 3.75     |          |          |          | 3.75       |      | 2        | 35         | 7.30E-09 |
| P15924-1   | 250/210 kDa paraneoplastic pemphigus antigen                                                          | DSP       |          | 3.84     |          |          | 3.84       |      | 2        | 0.7        | 1.76E-03 |

| UniProt ID | Protein_Name                                                                  | Gene Name | F1 (L/H) | F2 (L/H) | R1 (H/L) | R1 (L/H) | Mean (T/U) | S.D. | Pep. No. | %Seq. Cov. | PEP       |
|------------|-------------------------------------------------------------------------------|-----------|----------|----------|----------|----------|------------|------|----------|------------|-----------|
| Q86YJ6     | Threonine synthase-like 2                                                     | THNSL2    |          |          | 4.41     | 0.23     | 4.41       |      | 2        | 6.2        | 3.46E-02  |
| P05114     | High mobility group nucleosome-binding domain-containing protein 1            | HMG14     | 6.38     | 3.21     | 4.66     | 0.21     | 4.75       | 1.59 | 3        | 24         | 3.51E-31  |
| A5JHP3     | Dermcidin isoform 2                                                           | DCD       | 7.75     | 4.37     | 4.22     | 0.24     | 5.45       | 2.00 | 2        | 21         | 1.93E-35  |
| P06702     | Calgranulin-B                                                                 | CAGB      | 5.56     |          |          |          | 5.56       |      | 2        | 26         | 2.20E-66  |
| Q8TE01     | DERP12 (Dermal papilla derived protein 12)                                    | DERP12    | 6.21     | 7.55     | 6.12     | 0.16     | 6.63       | 0.80 | 11       | 42         | 1.60E-164 |
| P17096-1   | High mobility group AT-hook protein 1;High mobility group protein HMG-I/HMG-Y | HMG1      |          | 7.67     |          |          | 7.67       |      | 3        | 51         | 1.42E-55  |
| P05164-3   | 84 kDa myeloperoxidase                                                        | MPO       | 7.95     |          |          |          | 7.95       |      | 2        | 2.8        | 9.94E-06  |
| Q14473     | Beta-globin gene from a thalassemia patient                                   | HBB       |          | 22.05    |          |          | 22.05      |      | 10       | 51         | 0.00E+00  |

**Table S2.** A list of proteins which could be quantified in both forward and reverse SILAC labeling experiments and whose expressions were changed significantly upon <sup>S</sup>G treatment (“S.D.” represents standard deviation).

| <b>Protein ID</b> | <b>Protein Name</b>                                               | <b>Mean (T/U)</b> | <b>S.D.</b> |
|-------------------|-------------------------------------------------------------------|-------------------|-------------|
| P09382            | 14 kDa laminin-binding protein                                    | 0.31              | 0.01        |
| Q6UXB8-1          | Cysteine-rich secretory protein 9                                 | 0.36              | 0.08        |
| Q8WVG9-1          | G-protein coupled receptor 98                                     | 0.36              | 0.14        |
| Q8NB37-2          | Parkinson disease 7 domain-containing protein 1                   | 0.43              | 0.11        |
| Q99707            | 5-methyltetrahydrofolate--homocysteine methyltransferase          | 0.44              | 0.05        |
| P10606            | Cytochrome c oxidase polypeptide Vb                               | 0.45              | 0.08        |
| P63313            | Thymosin beta-10                                                  | 0.46              | 0.09        |
| A6NMH8            | Putative uncharacterized protein CD81                             | 0.48              | 0.49        |
| Q9H8V3-2          | Epithelial cell-transforming sequence 2 oncogene                  | 0.48              | 0.14        |
| B7Z6C0            | cDNA FLJ56946, highly similar to Cysteine-rich protein 2          | 0.49              | 0.24        |
| O75794            | Cell division cycle protein 123 homolog                           | 0.51              | 0.19        |
| P08590            | Cardiac myosin light chain 1                                      | 0.51              | 0.01        |
| P00403            | Cytochrome c oxidase polypeptide II                               | 0.51              | 0.07        |
| O75879            | Cytochrome oxidase assembly factor PET112 homolog                 | 0.52              | 0.14        |
| O95865            | Dimethylargininase-2                                              | 0.52              | 0.11        |
| P42575-1          | Caspase-2                                                         | 0.53              | 0.06        |
| Q9NUV9            | GTPase IMAF family member 4                                       | 0.53              | 0.02        |
| Q01970            | 1-phosphatidylinositol-4,5-bisphosphate phosphodiesterase beta-3  | 0.53              | 0.58        |
| O75155-1          | Cullin-associated and neddylation-dissociated protein 2           | 0.54              | 0.21        |
| P09669            | Cytochrome c oxidase polypeptide VIc                              | 0.54              | 0.04        |
| Q86UY6-1          | N-acetyltransferase 11                                            | 0.55              | 0.37        |
| Q15154-1          | Pericentriolar material 1 protein                                 | 0.55              | 0.12        |
| O95229            | ZW10 interactor                                                   | 0.55              | 0.06        |
| O43683            | Mitotic checkpoint serine/threonine-protein kinase BUB1           | 0.56              | 0.17        |
| Q13190-1          | Syntaxin-5                                                        | 0.58              | 0.08        |
| Q06945            | Transcription factor SOX-4                                        | 0.58              | 0.13        |
| P37268            | Farnesyl-diphosphate farnesyltransferase                          | 0.58              | 0.06        |
| Q14191            | DNA helicase, RecQ-like type 3                                    | 0.59              | 0.06        |
| A6NED2            | RCC1 domain-containing protein 1                                  | 0.59              | 0.08        |
| P30281            | G1/S-specific cyclin-D3                                           | 0.60              | 0.02        |
| O95299            | NADH dehydrogenase ubiquinone 1 alpha subcomplex                  | 0.60              | 0.02        |
| Q5TCU8            | Tropomyosin 2 (Beta)                                              | 0.60              | 0.09        |
| P63218            | Guanine nucleotide-binding protein G(I)/G(S)/G(O) subunit gamma-5 | 0.60              | 0.07        |
| Q6RFH5-1          | NOP seven-associated protein 1                                    | 0.61              | 0.15        |
| P84101            | Gastric cancer-related protein VRG107                             | 0.61              | 0.16        |
| C9JG49            | Protein tyrosine phosphatase, non-receptor type 6, isoform CRA_b  | 0.61              | 0.02        |

| <b>Protein ID</b> | <b>Protein Name</b>                                         | <b>Mean (T/U)</b> | <b>S.D.</b> |
|-------------------|-------------------------------------------------------------|-------------------|-------------|
| O60566-3          | MAD3/BUB1-related protein kinase                            | 0.61              | 0.07        |
| Q9ULT8            | E3 ligase for inhibin receptor                              | 0.61              | 0.11        |
| B4DGI9            | cDNA FLJ52589, highly similar to Transcription factor 12    | 0.62              | 0.10        |
| Q9BZL1            | Ubiquitin-like protein 5                                    | 0.62              | 0.03        |
| P51159-1          | GTP-binding protein Ram                                     | 0.62              | 0.07        |
| P56962            | Syntaxin-17                                                 | 0.62              | 0.03        |
| Q5T7F6            | Novel protein                                               | 0.63              | 0.02        |
| P08670            | Vimentin                                                    | 0.63              | 0.15        |
| P22695            | Complex III subunit 2                                       | 0.63              | 0.28        |
| Q96EB1-1          | Elongator complex protein 4                                 | 0.64              | 0.08        |
| Q53H12-1          | Acylglycerol kinase, mitochondrial                          | 0.64              | 0.08        |
| Q8NDI1-1          | EH domain-binding protein 1                                 | 0.64              | 0.13        |
| Q96EL3            | 39S ribosomal protein L53, mitochondrial                    | 0.65              | 0.08        |
| Q9UIC8-2          | Leucine carboxyl methyltransferase 1                        | 0.65              | 0.11        |
| Q9UPP1-1          | Histone lysine demethylase PHF8                             | 0.65              | 0.12        |
| P31930            | Complex III subunit 1                                       | 0.65              | 0.22        |
| P46108-1          | Adapter molecule crk                                        | 0.65              | 0.34        |
| Q9NP61            | ADP-ribosylation factor GTPase-activating protein 3         | 0.65              | 0.11        |
| Q96RT1-1          | Densin-180-like protein                                     | 0.65              | 0.00        |
| B7Z6Z4            | cDNA FLJ56329, highly similar to Myosin light polypeptide 6 | 0.65              | 0.03        |
| O94830            | DDHD domain-containing protein 2                            | 0.65              | 0.12        |
| Q14CJ1            | Amino-terminal enhancer of split                            | 0.65              | 0.14        |
| Q9BQS8-1          | FYVE and coiled-coil domain-containing protein 1            | 0.66              | 0.01        |
| Q9Y448            | Putative TRAF4-associated factor 1                          | 0.66              | 0.02        |
| Q9BXK1            | Basic transcription element-binding protein 4               | 0.66              | 0.15        |
| A2A305            | Ubiquitin associated protein 2                              | 0.66              | 0.15        |
| Q71RC2-4          | La ribonucleoprotein domain family member 4                 | 0.66              | 0.17        |
| P13051-1          | Uracil-DNA glycosylase                                      | 0.67              | 0.03        |
| O75146            | Huntingtin-interacting protein 12                           | 0.67              | 0.06        |
| Q9Y3P9-1          | GAP and centrosome-associated protein                       | 0.67              | 0.07        |
| P04818            | Thymidylate synthase                                        | 0.67              | 0.04        |
| Q9UJU2-1          | Lymphoid enhancer-binding factor 1                          | 0.67              | 0.05        |
| O15294-1          | O-GlcNAc transferase subunit p110                           | 0.67              | 0.16        |
| P18583-5          | Bax antagonist selected in saccharomyces 1                  | 1.50              | 0.14        |
| Q13510-2          | Acid ceramidase                                             | 1.54              | 0.37        |
| O75153            | Protein KIAA0664                                            | 1.54              | 0.28        |
| P78330            | L-3-phosphoserine phosphatase                               | 1.56              | 0.16        |
| Q9Y324            | rRNA-processing protein FCF1 homolog                        | 1.59              | 0.01        |
| Q9UNK0            | Syntaxin-8                                                  | 1.60              | 0.83        |
| Q5T440            | Putative transferase C1orf69, mitochondrial                 | 1.63              | 0.33        |
| B4DHQ3            | Phosphoserine aminotransferase                              | 1.63              | 0.37        |

| <b>Protein ID</b> | <b>Protein Name</b>                                                                                   | <b>Mean (T/U)</b> | <b>S.D.</b> |
|-------------------|-------------------------------------------------------------------------------------------------------|-------------------|-------------|
| B1ANH1            | Guanylate kinase 1                                                                                    | 1.63              | 0.10        |
| Q5T5C7            | Seryl-tRNA synthetase                                                                                 | 1.64              | 0.11        |
| Q15758            | Baboon M7 virus receptor                                                                              | 1.65              | 0.12        |
| O00165-2          | HCLS1-associated protein X-1                                                                          | 1.66              | 0.08        |
| Q9BV57-1          | 1,2-dihydroxy-3-keto-5-methylthiopentene dioxygenase                                                  | 1.67              | 0.10        |
| Q9UM00-1          | Transmembrane and coiled-coil domain-containing protein 1                                             | 1.72              | 0.44        |
| Q96N66-1          | 1-acylglycerophosphatidylinositol O-acyltransferase                                                   | 1.73              | 0.75        |
| P02794            | Cell proliferation-inducing gene 15 protein                                                           | 1.75              | 0.30        |
| O60610-1          | Diaphanous-related formin-1                                                                           | 1.83              | 0.38        |
| P50416-1          | Carnitine O-palmitoyltransferase 1, liver isoform                                                     | 1.91              | 0.25        |
| Q5JTJ3-2          | Uncharacterized protein C1orf31                                                                       | 1.92              | 0.44        |
| Q14657            | L antigen family member 3                                                                             | 1.92              | 0.27        |
| B4DW73            | cDNA FLJ50710, highly similar to Phosphoenolpyruvate carboxykinase (GTP), mitochondrial (EC 4.1.1.32) | 1.94              | 0.54        |
| Q01726            | Melanocortin receptor 1                                                                               | 2.08              | 0.38        |
| P53350            | Polo-like kinase 1                                                                                    | 2.22              | 0.78        |
| P08243            | Asparagine synthetase [glutamine-hydrolyzing]                                                         | 2.27              | 0.35        |
| P12236            | Adenine nucleotide translocator 3                                                                     | 2.29              | 1.26        |
| Q9NVP2            | Anti-silencing function protein 1 homolog B                                                           | 2.33              | 0.76        |
| Q9NQH7-1          | Aminopeptidase P3                                                                                     | 2.44              | 0.72        |
| Q75MQ0            | Putative uncharacterized protein EZH2                                                                 | 2.86              | 1.43        |
| P05114            | High mobility group nucleosome-binding domain-containing protein 1                                    | 4.75              | 1.59        |
| A5JHP3            | Dermcidin isoform 2                                                                                   | 5.45              | 2.00        |
| Q8TE01            | DERP12 (Dermal papilla derived protein 12)                                                            | 6.63              | 0.80        |

**Table S3.** Pathways perturbed by <sup>32</sup>S treatment, as identified by IPA. The most statistically significant canonical pathways and molecules identified are listed according to their p-value (-Log). The threshold of p-value is 0.05.

| <b>Ingenuity Canonical Pathways</b>       | <b>-log(p-value)</b> | <b># of Molecules</b> | <b>Molecules</b>                                                                                                                                                                                                                      |
|-------------------------------------------|----------------------|-----------------------|---------------------------------------------------------------------------------------------------------------------------------------------------------------------------------------------------------------------------------------|
| Mitochondrial Dysfunction                 | 7.41E00              | 13                    | NDUFA4 (0.64), NDUFV1 (0.48), CPT1 (1.91±0.25), MT-CO2 (0.51±0.07), NDUFA2 (0.63), UQCRC2 (0.63±0.28), UQCRFS1 (0.61), NDUFA10 (0.60±0.02), CYB5A (0.65), UQCRC1 (0.65±0.22), COX5B (0.45±0.08), COX6C (0.54±0.04), RHOT1 (0.58±0.06) |
| RhoGDI Signaling                          | 4.45E00              | 8                     | ARHGAP9 (0.41), MYL6 (0.65±0.03), RHOT1 (0.58±0.06), ARH9 (0.66), GNG5 (0.60±0.07), ARHGEF11 (0.51), GNA14 (1.52), MYL3 (0.51±0.01)                                                                                                   |
| CXCR4 Signaling                           | 4.19E00              | 9                     | MYL6 (0.65±0.03), RHOT1 (0.58±0.06), ARH9 (0.66), PLCB3 (0.53±0.58), GNG5 (0.60±0.07), CRK (0.65±0.34), ARHGEF11 (0.51), GNA14 (1.52), MYL3 (0.51±0.01)                                                                               |
| Signaling by Rho Family GTPases           | 3.97E00              | 9                     | SEPT8 (2.06), MYL6 (0.65±0.03), RHOT1 (0.58±0.06), ARH9 (0.66), VIM (0.63±0.15), GNG5 (0.60±0.07), ARHGEF11 (0.51), GNA14 (1.52), MYL3 (0.51±0.01)                                                                                    |
| RhoA Signaling                            | 3.59E00              | 6                     | SEPT8 (2.06), ARHGAP9 (0.41), MYL6 (0.65±0.03), ANLN (0.53), ARHGEF11 (0.51), MYL3 (0.51±0.01)                                                                                                                                        |
| ILK Signaling                             | 3.48E00              | 8                     | MYL6 (0.65±0.03), RHOT1 (0.58±0.06), ARH9 (0.66), VIM (0.63±0.15), LEF1 (0.67±0.05), MYH7 (0.30), MYL3 (0.51±0.01), DSP (3.84)                                                                                                        |
| Regulation of Actin-based Motility by Rho | 2.97E00              | 4                     | MYL6 (0.65±0.03), RHOT1 (0.58±0.06), ARH9 (0.66), MYL3 (0.51±0.01)                                                                                                                                                                    |
| Epithelial Adherens Junction Signaling    | 2.95E00              | 5                     | MYL6 (0.65±0.03), LEF1 (0.67±0.05), CRK (0.65±0.34), MYH7 (0.30), MYL3 (0.51±0.01)                                                                                                                                                    |
| Thrombin Signaling                        | 2.8E00               | 8                     | MYL6 (0.65±0.03), RHOT1 (0.58±0.06), ARH9 (0.66), PLCB3 (0.53±0.58), GNG5 (0.60±0.07), ARHGEF11 (0.51), GNA14 (1.52), MYL3 (0.51±0.01)                                                                                                |
| Phospholipase C Signaling                 | 2.73E00              | 9                     | AHNAK (1.62), MYL6 (0.65±0.03), RHOT1 (0.58±0.06), ARH9 (0.66), CAGA (0.08), PLCB3 (0.53±0.58), GNG5 (0.60±0.07), ARHGEF11 (0.51), MYL3 (0.51±0.01)                                                                                   |
| Oxidative phosphorylation                 | 2.51E00              | 11                    | MYL3 (0.51±0.01), COX5B (0.45±0.08), COX6C (0.54±0.04), NDUFA2 (0.63), NDUFA4 (0.64), NDUFA10 (0.60±0.02), NDUFV1 (0.48), UQCRC1 (0.65±0.22), UQCRC2 (0.63±0.28), ARHGEF11 (0.51), UQCRFS1 (0.61)                                     |
| Actin Cytoskeleton Signaling              | 2.46E00              | 4                     | MYL6 (0.65±0.03), CRK (0.65±0.34), MYH7 (0.30), MYL3 (0.51±0.01)                                                                                                                                                                      |
| Sphingosine-1-phosphate Signaling         | 2.33E00              | 4                     | RHOT1 (0.58±0.06), ARH9 (0.66), CASP2 (0.53±0.06), PLCB3 (0.53±0.58)                                                                                                                                                                  |

| <b>Ingenuity Canonical Pathways</b>                                   | <b>-log(p-value)</b> | <b># of Molecules</b> | <b>Molecules</b>                                                                                                      |
|-----------------------------------------------------------------------|----------------------|-----------------------|-----------------------------------------------------------------------------------------------------------------------|
| Actin Nucleation by ARP-WASP Complex                                  | 2.1E00               | 3                     | RHOT1 (0.58±0.06), ARH9 (0.66), FNRA (0.66)                                                                           |
| Cardiac Hypertrophy Signaling                                         | 1.84E00              | 7                     | MYL6 (0.65±0.03), RHOT1 (0.58±0.06), ARH9 (0.66), PLCB3 (0.53±0.58), GNG5 (0.60±0.07), GNA14 (1.52), MYL3 (0.51±0.01) |
| Clathrin-mediated Endocytosis Signaling                               | 1.79E00              | 4                     | LYZ (0.03), CAGA (0.08), CTTN (0.64), HIP12 (0.67±0.03)                                                               |
| Mitochondrial L-carnitine Shuttle Pathway                             | 1.63E00              | 2                     | CPT1 (1.91±0.25), ACS4 (0.48)                                                                                         |
| LXR/RXR Activation                                                    | 1.54E00              | 4                     | FDFT1 (0.58±0.06), LYZ (0.03), CAGA (0.08), IRF3 (0.66)                                                               |
| GADD45 Signaling                                                      | 1.50E00              | 2                     | CCND3 (0.60±0.02), CDK4 (2.27±0.04)                                                                                   |
| PAK Signaling                                                         | 1.44E00              | 3                     | MYL6 (0.65±0.03), CAGA (0.08), MYL3 (0.51±0.01)                                                                       |
| Cellular effects of sildenafil                                        | 1.44E00              | 4                     | MYL6 (0.65±0.03), PLCB3 (0.53±0.58), MYH7 (0.30), MYL3 (0.51±0.01)                                                    |
| Production of Nitric Oxide and Reactive Oxygen Species in Macrophages | 1.38E00              | 5                     | LYZ (0.03), MPO (7.95), RHOT1 (0.58±0.06), ARH9 (0.66), CAGA (0.08)                                                   |

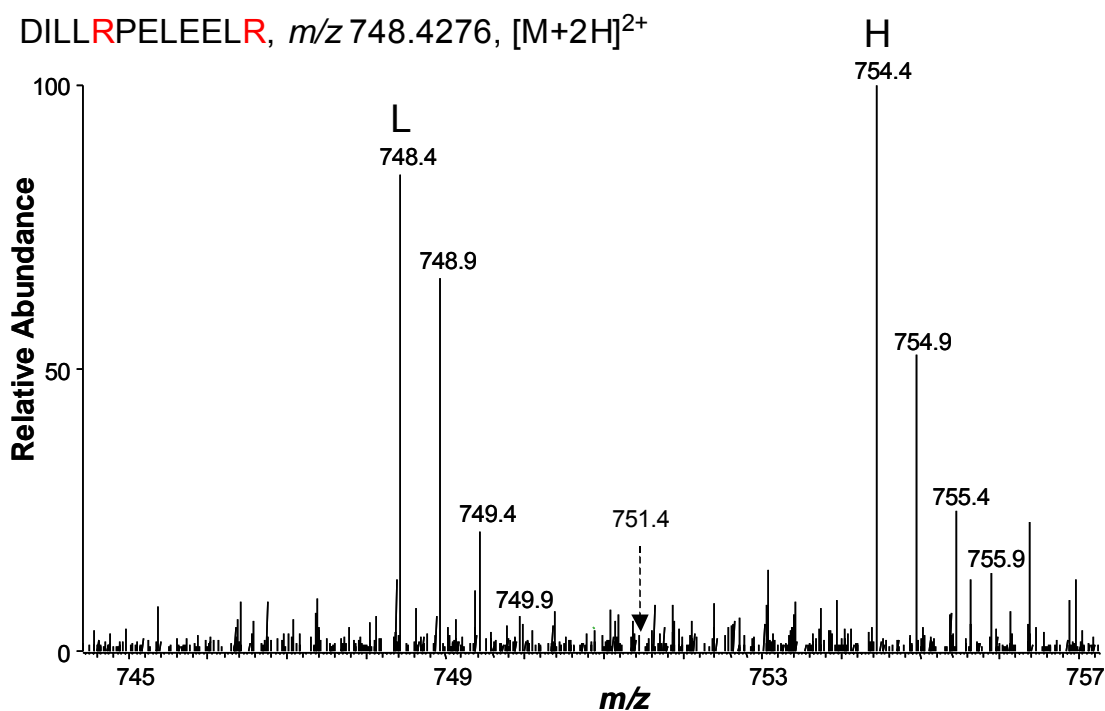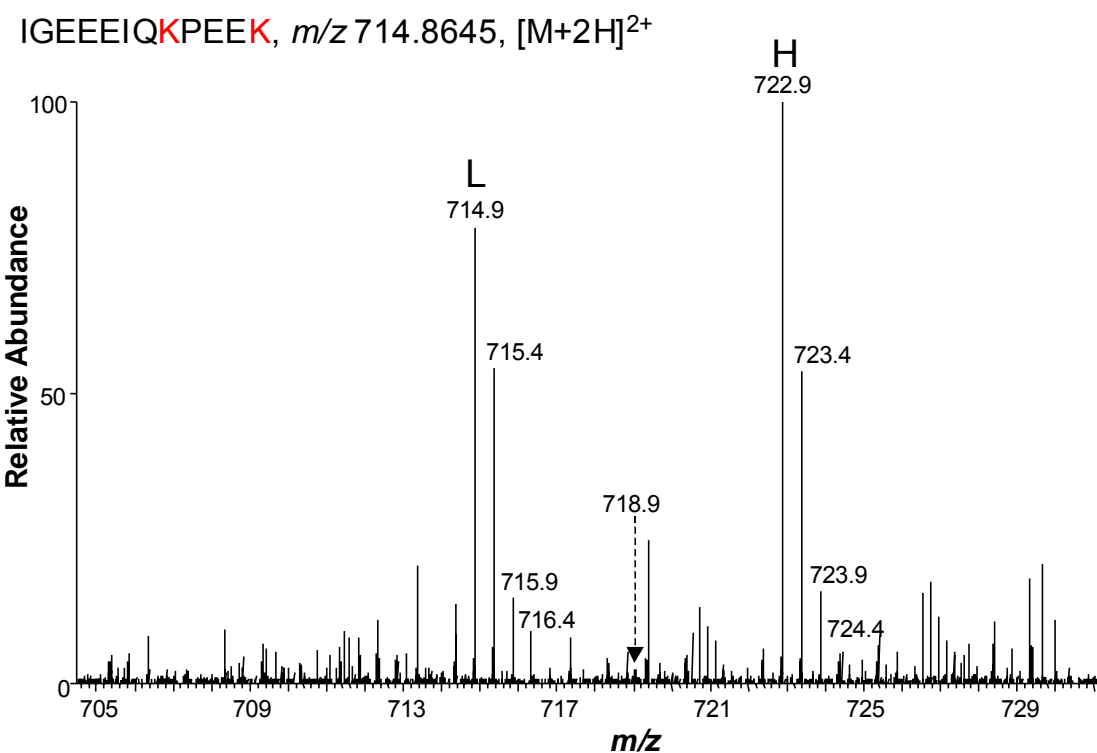

**Figure S1.** Example mass spectra showing the incorporation of heavy labeled K and R. Shown are the ESI-MS of two trypsin-miscleaved peptides which carry two arginines or two lysines; IGEEEIQKPEEK and DILLRPELEELR are derived from splicing factor 3a (SAP114) and NADH-cytochrome b5 reductase (CYB5R3), respectively. The ions of  $m/z$  751.4 and  $m/z$  718.9 refer to the putative incompletely labeled peptides (i.e., with a single R or K being heavily labeled), which are present at similar abundance levels as the noise peaks.



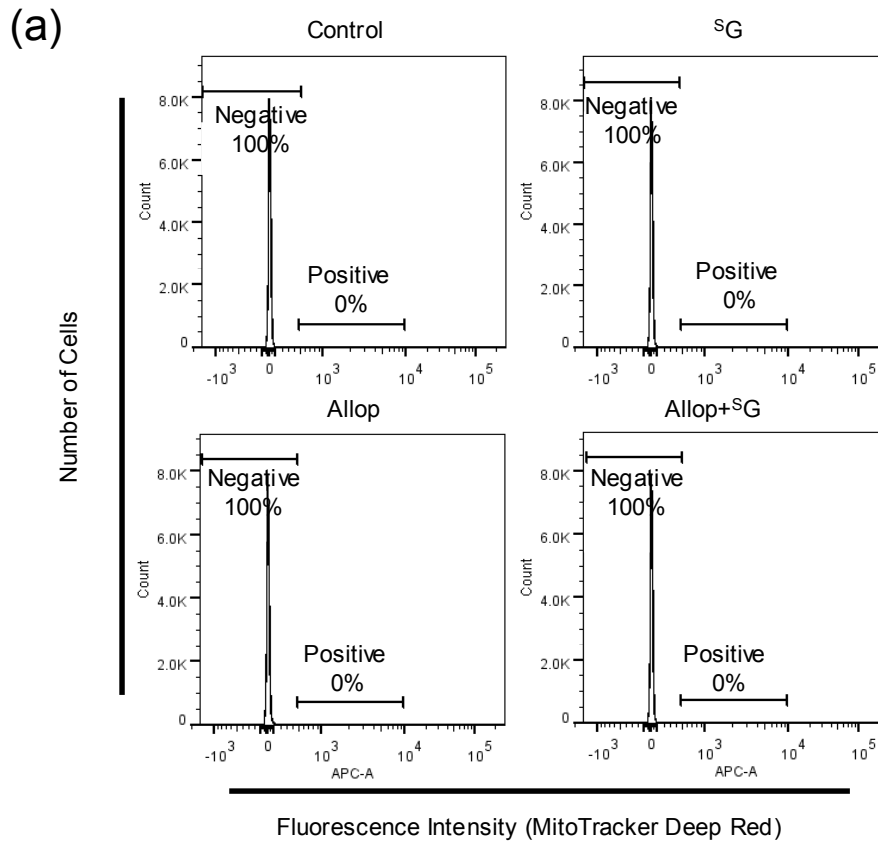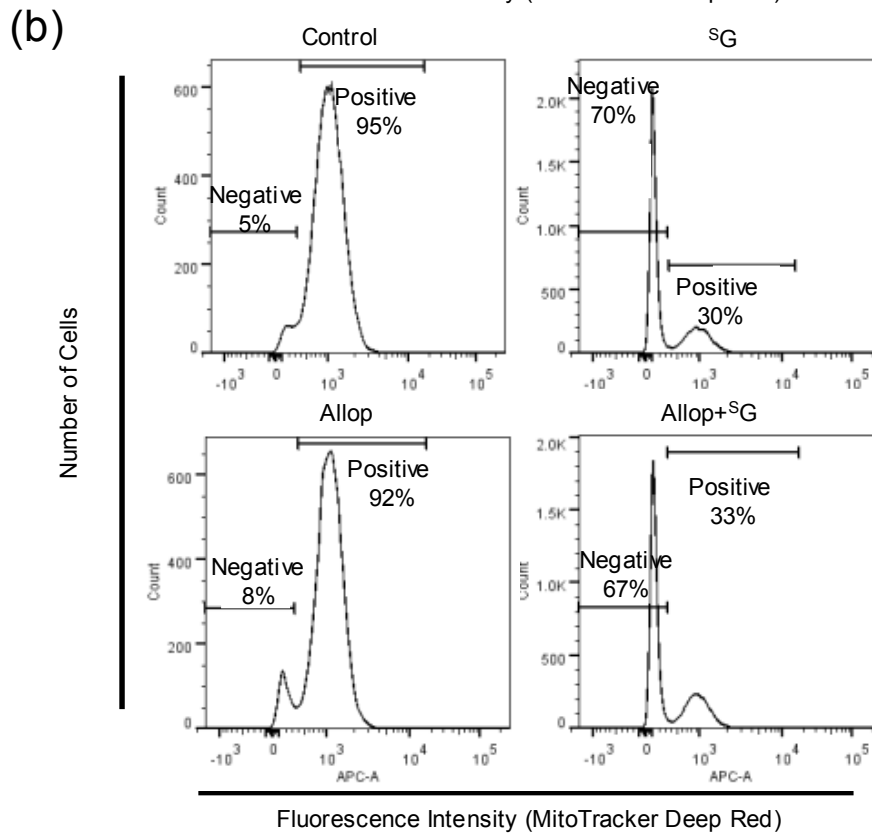

**Figure S2.** Flow cytometry results for control CEM cells, and CEM cells that were treated for 24 hrs with 3  $\mu\text{M}$   $^{\text{s}}\text{G}$  and 500  $\mu\text{M}$  allopurinol, alone or in combination. In (a), no MitoTracker Deep Red was added, whereas MitoTracker Deep Red was added in (b).

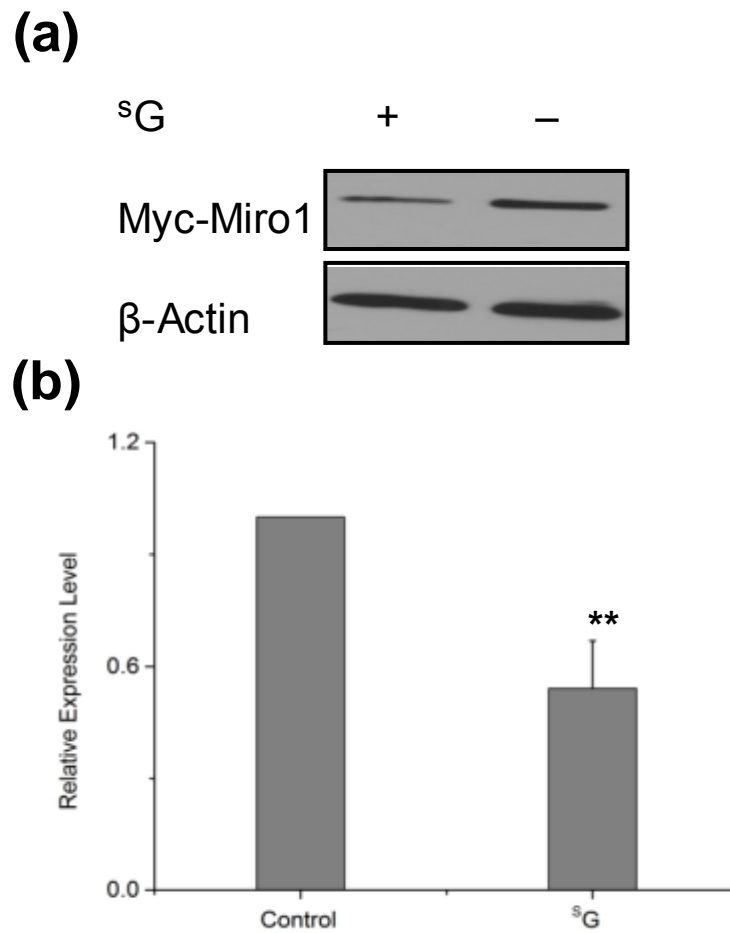

**Figure S3.** Western blot for monitoring the expression levels of ectopically expressed Myc-Miro1 in HEK293T cells upon treatment with 3  $\mu\text{M}$  <sup>s</sup>G (a).  $\beta$ -actin serves as the loading control. Shown in (b) are the quantification data, which represent the mean and S. D. of results from three independent drug treatment and Western blot experiments. “\*\*\*”,  $p < 0.01$ . The  $p$  value was calculated using two-tailed, unpaired student  $t$  test.

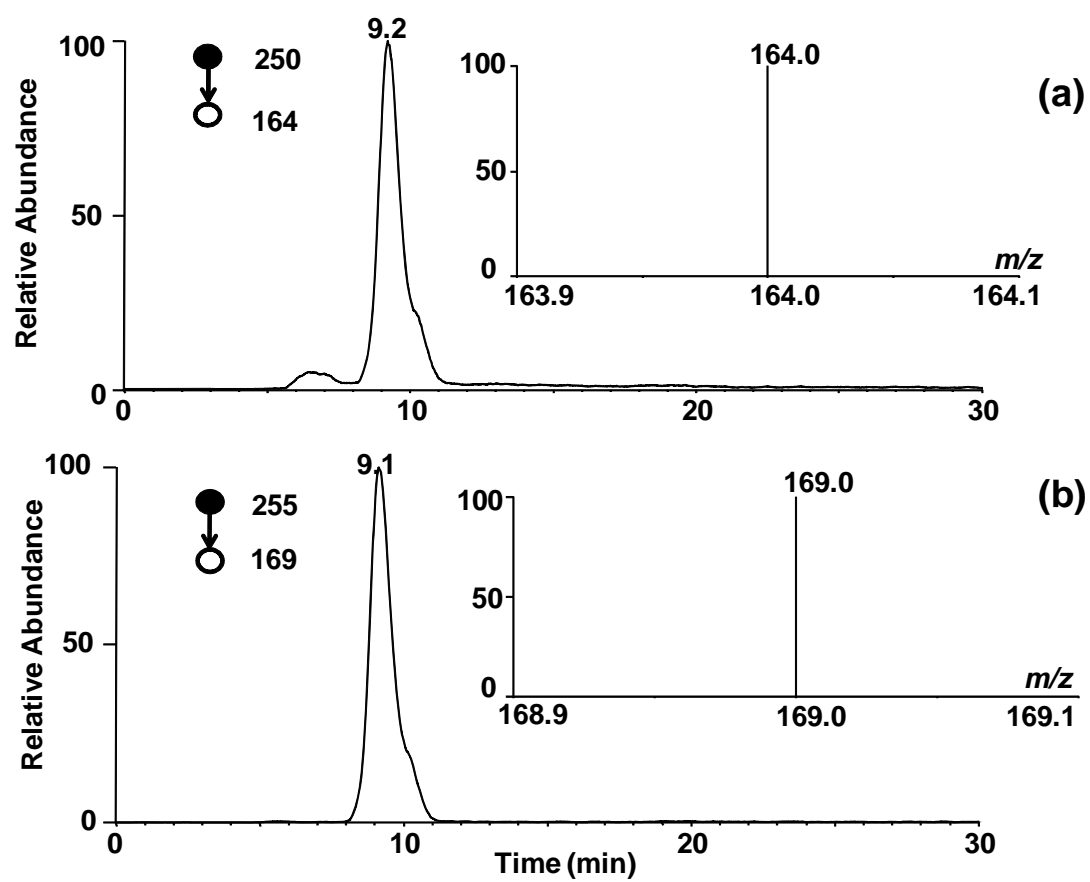

**Figure S4.** Selected-ion chromatograms for monitoring the transitions of  $m/z$  250 $\rightarrow$ 164 [(a), for unlabeled *R*-cdA] and  $m/z$  255  $\rightarrow$  169 [(b), for uniformly  $^{15}\text{N}$ -labeled *R*-cdA].

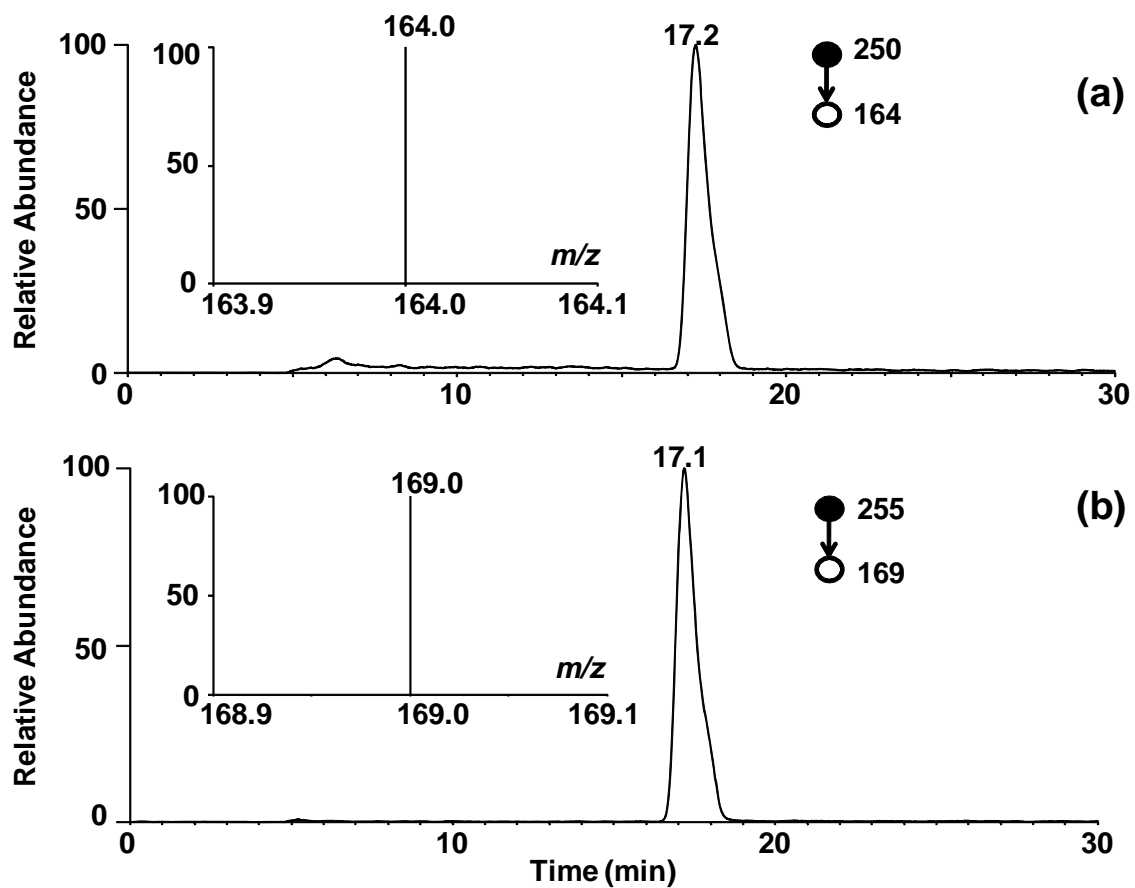

**Figure S5.** Representative selected-ion chromatograms for monitoring the transitions of  $m/z$  250 $\rightarrow$ 164 [(a), for unlabeled *S*-cdA] and  $m/z$  255  $\rightarrow$ 169 [(b), for uniformly  $^{15}\text{N}$  labeled *S*-cdA].

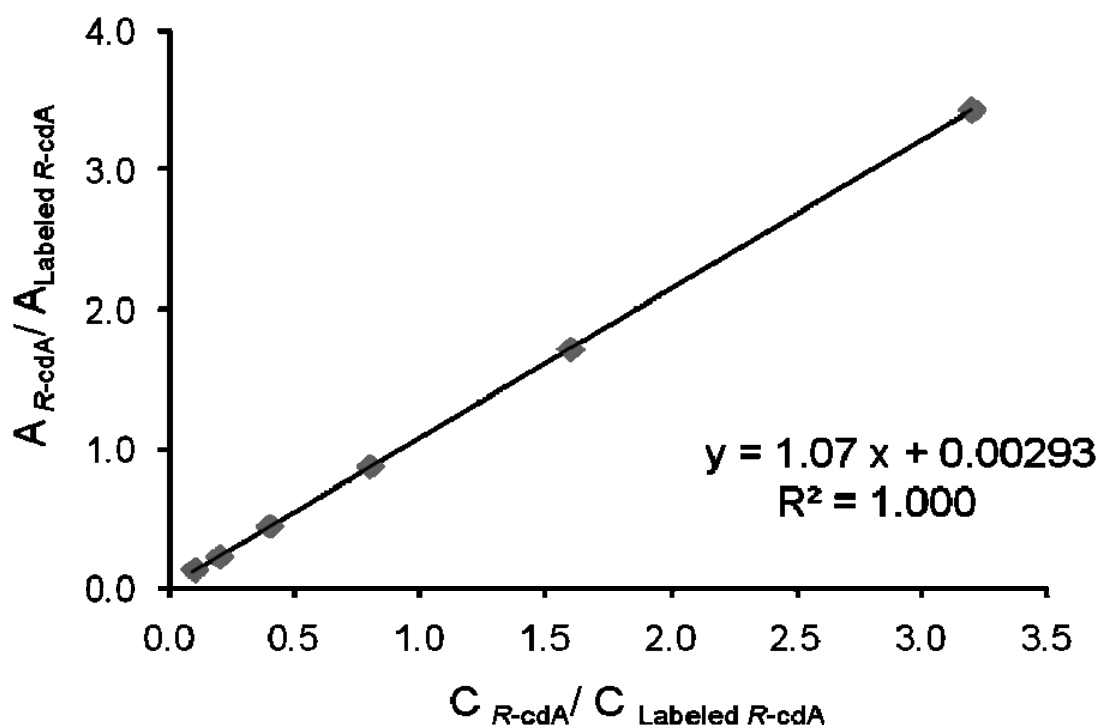

**Figure S6.** Calibration curve for the quantification of *R*-cdA, where 100 fmol of uniformly  $^{15}\text{N}$ -labeled *R*-cdA was added.

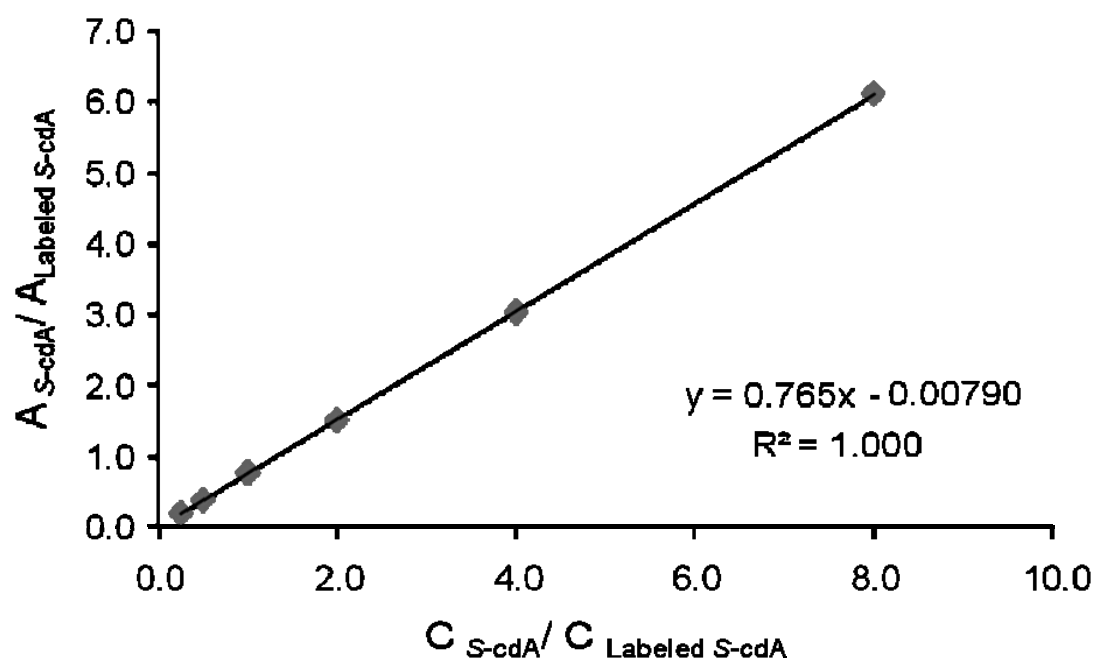

**Figure S7.** Calibration curve for the quantification of *S*-cdA, where 40 fmol uniformly  $^{15}\text{N}$ -labeled *S*-cdA was added to each sample.

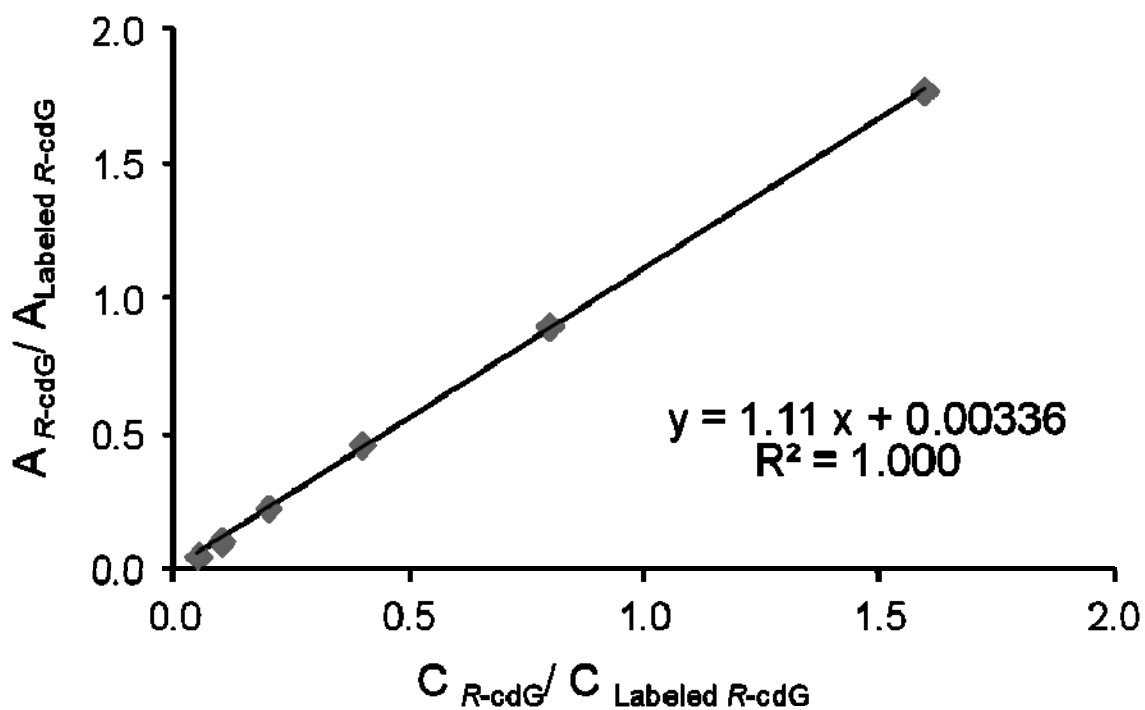

**Figure S8.** Calibration curve for the quantification of *R*-cdG, where 200 fmol of uniformly  $^{15}\text{N}$ -labeled *R*-cdG was added to each sample.

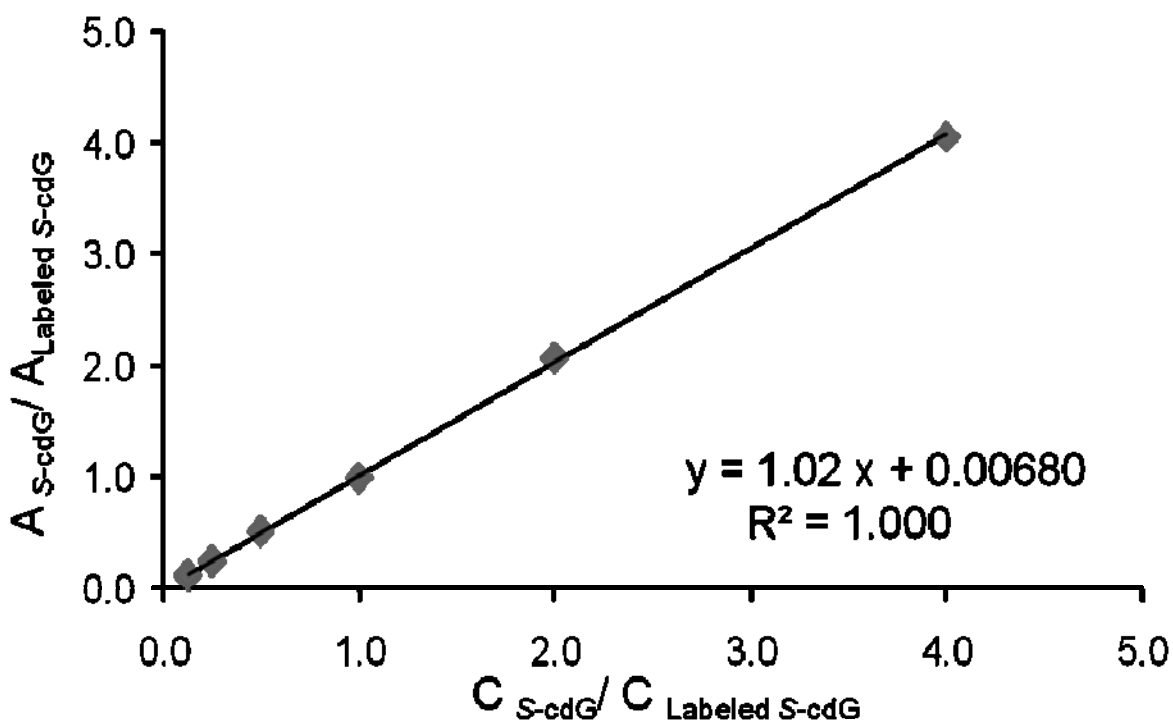

**Figure S9.** Calibration curve for the quantification of *S*-cdG, where 160 fmol uniformly  $^{15}\text{N}$ -labeled *S*-cdG was added to each sample.
